# Supplementary material for: Comprehensive tissue-specific transcriptome profiling of pineapple (Ananas comosus) and building an eFP-browser for further study
Source: PeerJ. 2018 Dec 4;6:e6028. doi: 10.7717/peerj.6028 (PMC6284516; doi:10.7717/peerj.6028)
Supplement: Supplemental Information 7 [file peerj-06-6028-s007.xlsx]

## Sheet: Sheet1
Table S1. Summary statistics for transcriptome sequencing of various tissue in genome-wide developmental expression analysis of Pineapple
Tissue
		Mapped reads	Total
			(GB)
First Stage
	Bract_1	35487764	4.43597
	Sepal_1	33396148	4.17452
	Flower_disk_1	26794264	3.34928
	Receptacle_1	32337386	4.04217
	Ovary_wall_1	36711708	4.58896
	Placenta_1	36368546	4.54607
	Ovule_1	32134714	4.01684
	Core_1	26683870	3.33548
	Petal_1	32875472	4.10943
	Stem_1	33772286	4.22154
	Leaf_1	30190142	3.77377
	Root_1	34824008	4.353
	Stamen_1	29133848	3.64173
	Style_1	29464732	3.68309
Second Stage
	Bract_2	29775874	3.72198
	Sepal_2	28788536	3.59857
	Flower_disk_2	28027154	3.50339
	Receptacle_2	37907026	4.73838
	Ovary_wall_2	34352056	4.29401
	Placenta_2	36926964	4.61587
	Ovule_2	33026530	4.12832
	Core_2	32694034	4.08675
	Stem_2	31094544	3.88682
	Leaf_2	30344484	3.79306
	Root_2	36154472	4.51931
Third Stage
	Bract_3	34894370	4.3618
	Sepal_3	31960954	3.99512
	Flower_disk_3	32405682	4.05071
	Receptacle_3	39221506	4.90269
	Ovary_wall_3	30114662	3.76433
	Placenta_3	37082804	4.63535
	Ovule_3	30677814	3.83473
	Core_3	37187272	4.64841
	Stem_3	33553456	4.19418
	Leaf_3	35256076	4.40701
	Root_3	36161838	4.52023
Total		1187782996	148.473
Average		3.2994e+07	4.12425
