# Supplementary material for: Comprehensive tissue-specific transcriptome profiling of pineapple (Ananas comosus) and building an eFP-browser for further study
Source: PeerJ. 2018 Dec 4;6:e6028. doi: 10.7717/peerj.6028 (PMC6284516; doi:10.7717/peerj.6028)
Supplement: Supplemental Information 8 [file peerj-06-6028-s008.xlsx]

## Sheet: Sheet1
Table S2. Expression patterns of consititutively-expressing genes of pineapple
	Bract	Core	Flower_disk	Leaf	Ovary_wall	Ovule	Petal	Placenta	Receptacle	Root	Sepal	Stamen	Stem	Style
Aco008289	484.823	664.847	667.151	803.473	773.631	597.258	762.737	839.036	805.696	583.957	586.961	848.965	574.335	788.187
Aco007160	365.969	332.964	434.346	309.739	347.411	455.847	456.226	472.41	346.695	412.97	383.787	366.872	352.105	451.172
Aco013953	310.69	305.273	408.787	256.664	328.99	378.024	426.335	426.613	365.552	276.792	365.422	420.596	377.113	388.806
Aco008794	219.492	337.057	301.003	364.029	354.693	363.855	256.13	368.203	295.249	317.69	202.26	362.285	336.063	292.152
Aco000662	324.602	311.215	335.121	243.513	279.678	241.379	340.999	297.75	329.86	229.034	342.899	253.125	264.313	295.612
Aco006323	223.784	207.876	321.498	225.56	251.044	333.684	310.8	313.258	233.519	269.529	241.035	286.433	297.565	320.803
Aco028583	238.732	315.651	296.077	308.375	288.099	233.986	226.377	296.95	298.772	285.422	208.207	271.294	278.596	233.028
Aco000571	273.04	270.449	300.247	133.434	265.21	265.759	324.191	300.736	250.688	249.047	269.095	215.647	289.878	299.824
Aco004139	255.947	245.139	288.948	232.203	218.431	266.872	284.084	282.64	230.862	220.439	228.8	260.791	291.933	280.303
Aco012376	302.23	277.902	294.361	124.323	263.909	263.362	262.796	272.099	253.36	197.216	255.653	259.618	234.691	276.674
Aco030299	266.212	264.209	246.698	131.611	230.891	269.204	259.01	261.393	222.096	227.887	222.649	292.607	214.914	267.636
Aco009488	179.641	254.002	241.585	164.257	238.307	237.554	247.167	273.669	229.357	268.285	173.414	277.121	286.282	280.338
Aco007554	228.823	235.673	240.692	137.649	226.759	289.158	263.044	282.816	222.833	253.878	207.739	271.565	205.782	261.739
Aco017987	201.874	274.157	205.175	167.61	212.237	235.292	247.533	216.846	203.286	272.85	185.928	258.529	250.641	240.997
Aco014396	199.583	192.931	241.156	211.81	218.135	208.882	174.133	225.748	207.6	231.986	227.459	113.854	241.622	183.296
Aco001794	230.258	208.993	205.188	123.115	176.401	189.394	207.611	183.017	211.676	239.892	211.1	166.226	225.746	193.572
Aco007872	159.074	154.952	224.639	177.567	183.057	215.526	233.887	225.552	163.901	173.35	154.439	221.228	186.506	225.979
Aco002677	198.849	186.755	164.59	152.469	199.056	180.223	170.271	207.679	171.813	157.189	183.233	192.199	146.694	190.838
Aco004279	193.839	206.84	148.394	215.885	169.33	196.096	135.114	218.839	162.72	197.698	169.729	162.932	184.794	137.148
Aco017783	187.857	158.948	203.147	87.8509	178.828	199.163	210.584	131.922	212.643	162.464	165.425	209.879	160.385	193.167
Aco017989	133.754	182.998	153.492	120.778	157.512	186.182	189.201	192.053	146.49	189.574	124.081	183.34	161.862	181.56
Aco020122	153.786	180.367	152.517	128.666	138.228	161.892	121.98	156.122	156.752	187.746	141.448	173.994	174.243	139.426
Aco012215	115.518	131.458	172.868	103.837	177.156	183.528	170.993	161.785	143.119	149.502	120.912	165.131	177.914	182.051
Aco008202	149.165	152.407	145.499	85.4241	141.909	147.346	163.193	133.526	171.048	176.982	138.346	144.013	126.367	156.133
Aco010152	142.208	134.457	147.602	76.1038	135.692	151.878	151.997	120.074	159.404	103.886	132.803	158.427	126.824	144.716
Aco006560	147.533	130.45	128.238	128.502	114.086	159.048	126.514	115.301	135.268	144.793	143.678	132.867	136.691	123.893
Aco009406	137.148	119.725	127.286	139.519	122.655	141.371	138.951	147.122	122.316	119.372	118.642	133.793	115.495	125.208
Aco006983	134.758	133.68	144.008	93.4924	124.016	137.277	127.466	133.618	135.744	125.693	113.967	122.774	110.284	136.165
Aco002097	95.4942	123.198	112.953	119.168	140.063	122.688	104.737	142.726	140.239	142.842	86.4149	99.9041	142.23	136.786
Aco029350	105.544	142.98	140.587	131.488	141.273	112.57	100.464	127.092	132.764	123.973	93.3699	119.936	126.385	98.574
Aco009394	92.7967	128.528	107.319	123.026	110.431	116.94	119.858	107.435	98.564	127.927	89.5036	132.976	137.952	124.079
Aco006057	109.19	105.371	121.859	107.476	94.3534	123.085	111.2	84.1771	104.352	117.734	106.669	132.57	130.823	106.108
Aco005260	96.9221	98.4001	108.38	120.372	99.9068	128.243	109.784	127.731	88.9126	109.583	86.7375	131.57	117.901	107.716
Aco012203	84.2842	97.9369	125.145	114.109	92.0185	120.118	116.338	129.864	86.6095	106.935	84.4649	130.437	117.73	122.417
Aco006138	118.375	126.564	113.085	89.0857	86.792	107.983	120.793	109.694	112.11	88.8594	105.189	129.498	86.9482	125.128
Aco006283	112.157	116.332	114.501	77.7838	100.799	127.944	93.3505	100.044	102.15	109.719	102.537	121.141	96.6852	105.338
Aco016095	80.9748	105.666	110.242	82.848	102.625	105.031	108.131	116.352	118.872	110.656	98.0007	99.5719	117.745	121.831
Aco002746	110.409	117.189	96.9215	118.053	103.57	112.288	84.9517	102.127	100.827	98.558	101.611	109.002	114.818	90.7662
Aco005880	121.528	109.858	96.9433	91.2509	90.1604	99.1775	104.318	85.5945	89.6903	121.55	96.8003	92.601	106.477	100.084
Aco014641	82.3192	90.076	95.1406	66.5789	107.981	116.595	107.016	101.902	103.385	104.196	90.1349	101.77	113.268	121.682
Aco002381	99.4641	108.195	93.0001	63.0645	103.715	106.289	109.721	83.7973	116.355	107.028	84.5427	99.3907	113.498	109.859
Aco021289	92.1713	88.1898	103.117	69.9625	101.625	114.646	107.682	92.1462	93.0401	91.8434	83.3117	109.811	117.023	117.66
Aco005837	100.236	97.0225	96.351	104.983	99.2674	103.679	68.1227	94.655	92.2393	115.06	105.039	77.9906	107.513	70.6619
Aco001465	110.93	86.6513	99.8717	72.167	95.3036	100.592	96.0599	83.4025	103.379	81.4029	97.1138	93.6031	69.3662	102.658
Aco018994	104.871	101.075	93.1622	49.0298	103.007	108.121	79.0804	101.737	95.2131	89.4625	96.9034	83.0635	83.2412	64.7999
Aco009684	85.7503	91.7062	96.6008	49.2752	79.2322	104.182	89.5774	75.3931	88.545	93.5621	80.4179	100.996	89.2435	99.3871
Aco023943	58.2026	75.624	76.8566	94.715	82.1626	94.7188	94.7228	95.8984	86.6624	88.0638	57.0958	100.911	91.6871	94.637
Aco013091	84.8538	75.4294	85.8596	82.5429	74.8242	82.7541	84.6633	84.4027	93.9276	92.3329	78.0952	90.6934	76.1786	101.889
Aco010250	77.7247	92.556	83.5531	77.3302	78.7896	99.2921	87.571	101.465	86.9244	81.6408	74.7646	80.3758	63.4275	82.958
Aco017592	96.8605	100.522	94.3056	88.2305	92.5434	95.8853	67.8626	91.1192	85.5313	70.72	79.2883	68.5681	59.5515	75.9309
Aco028386	78.8984	83.0904	85.729	98.6061	82.4216	94.869	62.497	86.826	88.2106	93.1418	80.5031	54.3035	90.7461	67.767
Aco010854	76.6815	87.0244	92.4092	43.1325	81.5065	86.3725	93.8231	77.2642	87.819	72.4457	76.5843	91.3124	84.2451	93.7228
Aco003682	64.6699	72.8994	85.9525	80.4536	71.824	91.211	84.999	88.2785	73.9601	83.3618	68.0425	66.2309	96.4232	88.955
Aco007148	71.9376	92.8381	95.1206	31.9578	89.8949	83.2322	85.8945	92.2425	92.4889	45.266	88.6111	87.5522	73.4684	86.4384
Aco018581	73.9173	72.0151	77.0086	78.201	80.3338	93.4021	64.6085	89.7887	70.6164	80.1722	68.645	92.6776	86.6774	86.4003
Aco019707	71.834	67.1583	81.1792	61.4489	95.501	94.4809	90.0787	79.7351	83.8204	76.6147	69.6483	73.5313	84.3612	78.6731
Aco010006	72.3047	71.3458	79.7318	74.0098	92.3178	91.0998	75.442	82.8082	86.5243	86.1539	68.4674	59.4044	89.0024	76.3763
Aco014608	84.2399	86.6704	72.2498	48.6946	81.6011	95.3922	75.7083	64.1047	81.8074	82.1136	80.2163	75.955	93.5004	80.9412
Aco009393	77.3966	91.167	92.3517	57.4648	73.8655	71.9884	81.958	65.4576	82.3532	80.0279	75.7271	77.3405	92.3253	76.8381
Aco015048	75.7111	65.3313	76.2422	64.7391	69.1303	84.3008	83.9645	71.4827	77.5806	79.4929	67.2571	67.5381	85.5486	92.0988
Aco002191	73.6886	88.1214	64.4632	58.5891	78.4465	86.0545	74.4796	68.9986	74.7731	87.7481	63.1483	89.4317	67.9269	73.1221
Aco010811	66.9466	68.001	74.0502	67.6561	79.9609	77.2976	78.3802	69.7689	67.111	85.8724	55.5412	85.6043	84.5139	79.231
Aco002208	78.4544	78.1485	63.2779	79.7827	63.3236	73.119	67.2591	61.493	80.1703	84.1795	63.6471	86.5621	86.7709	69.1282
Aco006446	76.1624	70.6374	71.2652	82.6465	69.5947	80.3205	55.412	70.596	75.628	87.7568	71.7235	56.1262	84.1828	61.3805
Aco017287	67.8929	68.0177	76.1057	60.8498	66.934	81.4396	80.2941	63.5529	64.2096	83.1283	56.4295	86.3858	63.7748	80.9496
Aco024714	48.1271	57.3581	81.0835	82.3503	79.4197	86.867	73.9554	63.5483	54.0185	85.917	50.1477	80.8326	69.3543	82.9537
Aco000333	67.5447	81.5713	56.27	78.3021	73.4237	71.0318	75.0419	70.1126	78.8021	71.194	58.7545	82.6188	48.1483	67.2671
Aco025214	81.6468	70.8773	66.876	66.5396	56.8635	65.7036	73.1625	68.3557	62.3637	67.4829	71.4769	52.8261	79.3749	64.6009
Aco016295	69.7886	57.7169	67.4985	76.686	63.8786	75.2226	65.651	71.9684	60.0218	65.3368	62.3864	58.234	72.5536	68.9563
Aco026193	63.9521	74.0528	58.4066	56.4554	63.4039	55.2268	78.2185	59.6576	66.7072	82.0148	47.3462	74.6442	75.3547	79.7167
Aco010484	62.6199	48.2347	79.5606	57.057	62.108	77.84	76.7946	77.9872	66.9034	73.2005	48.6884	42.5619	74.6581	77.0013
Aco018714	67.7002	63.0607	59.2532	61.1242	63.0361	80.1952	61.6269	66.4778	67.6914	80.7641	61.3659	66.9079	60.8173	61.483
Aco001323	56.3553	64.3457	57.9975	58.2788	75.3789	80.2286	60.4375	67.0534	65.1054	72.9685	57.2908	64.3698	68.0026	69.5227
Aco010482	60.5707	64.9361	74.8459	36.8111	71.4661	77.9028	62.962	73.5365	60.1752	75.7228	51.2359	41.6304	73.3495	67.9056
Aco021628	58.7371	59.0401	60.4917	61.4521	75.8251	66.5332	71.4533	60.9541	63.5813	59.9622	56.4744	60.9922	65.6149	68.4746
Aco000422	56.4048	40.9809	63.7769	60.0934	65.1041	73.2376	70.2329	67.989	56.436	61.6273	62.3079	47.9703	71.8657	67.5038
Aco017514	68.7167	73.8575	51.3845	49.2574	65.0953	63.3644	65.3084	52.6608	74.3	67.67	56.1418	63.3785	47.5543	62.3356
Aco001347	51.4085	73.6904	62.419	72.662	67.6694	66.3918	46.678	66.7028	58.7862	73.5498	49.0499	54.0889	66.2456	50.4915
Aco015248	67.1221	68.1714	60.5293	69.7712	65.3546	45.3168	66.9998	49.5252	71.2686	63.4579	56.1988	34.8757	48.9349	63.6975
Aco018004	58.9697	57.3887	57.9188	45.6105	61.768	52.4367	56.2262	54.9475	65.5803	58.2613	51.3941	70.4725	71.802	61.3937
Aco003947	53.5702	60.9527	48.7447	55.155	65.0323	64.2198	56.9417	55.1787	61.0423	53.1369	48.3473	69.2846	63.9504	63.8722
Aco018424	50.6294	69.7872	49.2922	64.4214	57.9756	64.156	62.0029	49.0897	55.4281	58.0759	44.2323	65.5697	57.1056	56.7875
Aco015353	63.3962	60.0304	51.5826	57.0689	54.2007	52.2166	60.3753	52.3737	61.3248	51.0677	60.5039	56.8965	58.5039	58.6992
Aco007749	52.4061	62.925	47.2845	45.4298	60.8801	66.8986	56.2251	47.2213	65.854	55.0331	45.9663	66.5026	46.2729	58.5916
Aco004007	55.1465	53.2341	43.9154	38.5985	66.2549	66.5134	49.1191	53.2568	50.3626	65.1212	50.8115	65.7809	52.6764	55.3707
Aco024796	54.4267	38.8988	64.2975	63.1566	57.0475	61.214	49.9991	62.0345	47.9621	65.2151	51.9035	37.6428	65.0271	45.4507
Aco007490	62.2334	55.722	47.9692	32.2003	55.5586	58.2747	57.0782	51.6359	62.8076	53.8097	50.6515	61.5285	49.0517	55.873
Aco014157	61.8002	51.7146	47.163	45.9978	50.3351	60.5085	50.516	52.6981	55.2933	56.5783	54.3696	50.5588	53.0308	56.9234
Aco013735	49.9903	56.9878	47.6149	63.3823	49.5647	61.6387	47.3986	56.2514	52.0003	49.5277	45.2902	57.1236	44.6306	52.4767
Aco016987	54.5645	56.5308	49.1032	40.852	55.5137	53.7816	53.6863	55.9987	47.0939	52.0445	53.9333	60.9334	43.8142	49.8069
Aco011848	57.0582	56.2324	50.0505	36.3715	54.8169	59.6862	57.3294	40.1363	63.1268	50.8557	51.5737	45.0847	50.1892	51.9669
Aco010178	42.0725	50.9083	46.5987	53.6023	49.1588	52.9691	54.3137	54.2802	45.8725	53.2291	39.923	54.9602	56.1268	56.3959
Aco030406	46.2605	45.6914	55.5616	20.0791	53.7241	51.0915	54.5938	55.5296	58.9258	52.3175	50.0128	48.0708	51.0522	51.8639
Aco010205	47.2568	54.2193	50.211	38.4987	58.1489	50.8119	33.9825	60.3879	55.1427	45.6052	52.4651	53.1759	51.441	39.9972
Aco014145	43.8539	53.7128	44.1398	48.8125	55.183	53.4646	40.577	56.7288	49.2279	49.5725	44.1197	49.0707	58.6154	42.8846
Aco010423	42.3836	49.6467	55.905	35.5951	52.3997	54.3733	49.5837	53.0659	51.5841	47.2148	47.1806	44.8716	55.3427	49.7712
Aco017742	59.3347	44.6904	55.8421	28.0705	51.3355	53.6175	50.562	39.0046	57.1926	45.9255	53.7098	46.6414	50.8203	45.3692
Aco021515	48.5116	52.6983	48.539	39.9239	52.4093	47.014	53.1966	46.6513	50.2962	42.5069	49.5778	45.9197	56.6919	48.086
Aco011540	55.2742	59.5119	42.5292	31.669	47.78	47.7961	52.9386	40.6511	58.5756	50.5327	45.3953	50.6784	48.3734	47.7878
Aco011753	41.8463	48.2674	47.7757	52.0444	52.6865	54.2083	45.2954	50.4025	45.0802	54.2033	39.0414	45.5403	50.0219	52.061
Aco020593	50.0921	50.4361	46.6172	29.5796	47.0252	49.412	52.8923	39.4105	57.6959	46.3785	44.1117	50.5305	53.6005	50.2697
Aco017047	46.8184	53.3246	41.5961	33.7848	52.4114	45.7512	41.6755	43.1152	57.6527	43.2398	44.056	56.4007	54.4394	43.1612
Aco011933	45.8818	55.4443	42.1627	42.3769	44.0254	51.6482	30.4194	49.0792	53.5114	54.6126	55.4538	43.7365	43.7417	40.5186
Aco003259	46.856	55.4705	41.3113	41.924	48.3453	54.9682	44.2582	46.4314	52.4837	46.5874	40.7053	46.4275	34.5827	47.2117
Aco003299	43.6483	50.8464	42.0336	26.067	47.5382	43.0904	51.1954	38.2495	52.4593	49.4076	37.9956	55.3082	52.1035	56.1796
Aco015857	34.488	44.7563	44.9235	35.0686	49.858	55.6275	44.1262	53.1928	42.6715	53.1684	29.9653	54.7344	45.7524	51.386
Aco024435	45.9073	43.2041	47.4009	46.9892	49.7974	47.9533	48.4882	51.1462	39.7214	38.6139	44.0499	42.5123	41.4834	47.711
Aco021572	47.4104	50.8081	41.9616	35.8701	42.8806	54.2747	35.4634	45.8702	47.1152	54.5871	45.0372	40.317	49.175	39.5771
Aco021534	52.5507	52.1168	35.3479	47.3764	38.5221	47.7546	43.4744	35.5767	53.3695	43.7905	40.3175	54.492	41.4365	41.4845
Aco006302	48.9755	49.7046	45.5586	34.1876	43.4427	49.983	38.5992	50.4697	36.0941	49.4489	48.066	40.6348	50.1871	40.9956
Aco000696	46.7895	48.6602	50.7162	20.4686	53.8166	41.969	49.7342	48.7702	54.0053	26.853	50.3894	35.8454	52.6333	42.7424
Aco018633	35.0809	41.7305	39.3114	34.4319	51.6061	54.4178	53.7728	41.7112	45.2839	45.3779	37.1941	52.5036	42.4316	46.9147
Aco000282	35.6991	46.941	41.099	31.177	44.6139	51.8115	47.0215	45.7777	44.5978	48.6434	39.3933	45.0561	51.0374	48.4298
Aco007202	47.6471	45.2826	41.6726	33.3551	44.5919	49.7993	48.3875	37.8177	52.0314	52.026	36.6653	46.3636	42.3561	39.0414
Aco024845	41.5169	43.9743	43.5103	41.7111	51.536	49.483	44.5361	46.5905	44.5782	42.1427	37.2035	47.7567	25.7939	49.2763
Aco013569	48.3681	51.5519	43.6144	21.726	50.9958	44.5942	45.8241	44.0601	52.5913	33.0875	46.7692	44.3277	34.5312	47.3164
Aco017005	40.3533	45.0139	42.0486	46.0581	42.1531	48.2915	51.5465	45.4259	32.9091	50.7601	34.4708	47.8916	31.4568	44.4128
Aco010257	35.4222	51.5423	44.2923	34.3996	49.8487	52.5698	49.7139	35.4423	52.5457	45.0722	34.6249	35.3725	32.9578	47.275
Aco014692	36.4338	47.0771	40.2984	38.8657	39.8625	47.996	44.2559	44.9223	43.9666	50.2454	37.6433	38.6985	39.2771	51.1215
Aco017826	52.0474	51.8352	43.7322	32.4264	45.3937	47.4696	29.6684	41.5931	44.9883	48.2813	50.2342	29.0131	45.7023	31.0021
Aco018120	41.0445	49.5513	40.8548	32.4112	39.7716	51.4636	43.4072	40.816	38.0467	48.884	40.1876	42.0793	42.9828	40.155
Aco011103	37.3472	40.9147	40.4641	33.7954	41.8191	49.0571	46.6565	47.3394	46.0368	41.5496	30.6374	49.2992	37.2683	46.5818
Aco028435	42.0073	34.4997	42.0313	50.2647	38.1474	47.241	40.4068	45.4255	43.5869	31.4487	48.3937	37.3682	38.2488	41.5501
Aco011596	47.5027	43.8146	44.2555	32.6955	46.2897	47.5023	44.2802	36.3675	38.6452	26.4671	49.6428	44.3877	42.59	35.966
Aco000172	43.8625	46.0624	36.4094	30.9677	38.9666	48.2019	44.2918	40.4333	50.4614	45.4878	36.1793	38.6784	34.4223	44.3154
Aco018396	39.3908	49.3663	42.2337	38.1001	39.889	39.2887	40.3515	38.5723	39.2377	37.0681	38.9941	48.1054	46.6214	41.4073
Aco008740	34.2546	45.1322	35.1552	40.6363	47.1038	49.284	43.2321	37.3646	39.1905	41.0971	33.3439	49.5055	36.1099	44.4142
Aco015308	40.971	39.9273	37.905	34.2493	43.2398	47.9747	43.8604	36.8418	42.1945	47.4303	35.6255	39.6005	35.9375	42.362
Aco016104	47.6778	42.9842	37.5906	31.2782	46.7395	45.4185	31.8309	42.3689	43.1657	47.6855	45.8161	32.6845	44.7409	27.14
Aco000484	34.0558	33.6772	37.7366	40.7561	37.8042	47.034	39.0823	39.2035	37.2078	35.1266	35.6616	48.8566	46.6832	47.5962
Aco015890	37.6064	43.8072	37.1186	30.6868	46.3616	45.6455	33.0115	37.6972	45.7828	43.294	31.1658	45.8542	47.0209	35.0438
Aco003726	39.4832	36.0888	44.0105	20.0062	44.8186	46.7838	44.0961	40.6627	48.6236	31.9432	39.9292	46.8985	33.6981	37.4099
Aco022168	31.8553	33.7946	35.2299	39.3263	44.7824	43.2237	43.1136	44.713	39.6478	40.5747	31.9852	38.3593	40.4766	42.2899
Aco012449	42.5667	44.6962	36.5575	36.4906	45.3153	45.711	41.0779	30.2237	44.7322	30.9042	39.8042	42.6632	29.6651	37.7632
Aco005147	47.6389	39.6005	34.5181	33.7621	38.9428	47.4404	34.8995	38.2393	35.3139	43.7798	47.6789	35.3573	36.6341	31.8612
Aco019356	34.9023	39.3438	38.2606	41.9629	43.9454	47.2721	36.3776	37.7299	34.5814	34.5235	30.2896	45.6903	36.3141	40.7599
Aco009309	37.8353	34.4953	32.6274	33.6964	41.5334	46.6018	33.9665	41.23	41.0536	38.8004	38.165	33.9962	41.2433	37.3851
Aco021015	33.7433	34.2512	36.0136	35.3659	39.0981	43.3808	36.0647	41.6041	34.4642	45.5462	32.0604	39.7222	39.2773	39.1944
Aco011381	44.4493	41.9743	31.3792	40.8067	41.0333	35.8868	36.5941	30.0389	43.3843	27.1292	38.5294	37.8513	32.2453	38.0995
Aco015182	31.6112	33.734	42.5369	31.2305	42.8075	42.315	40.8368	31.3054	39.8939	29.3483	36.1116	36.0671	36.0132	45.3936
Aco003978	35.4632	36.7363	38.2176	38.2701	43.4821	33.289	38.1123	33.8086	37.2641	31.1946	36.7797	43.1789	38.28	32.4757
Aco000467	33.5521	33.5612	31.4344	41.1955	42.7134	42.5352	31.8745	38.9919	42.7881	40.6318	35.1374	32.3228	38.763	30.4659
Aco006623	42.5079	31.71	32.1481	41.4246	35.3868	41.0801	26.5353	34.4565	31.9894	41.0159	44.8581	40.7616	39.4395	29.3403
Aco018482	29.8596	35.3956	34.1035	26.2436	35.1485	40.4918	44.4836	32.4089	39.8231	42.0663	27.3992	41.6312	44.1469	38.9121
Aco015043	41.0637	33.7808	40.3264	38.7144	37.3822	40.2872	24.532	39.3058	32.6557	35.7336	41.9875	33.1688	33.516	30.5829
Aco004808	43.6862	33.3016	32.2744	21.8403	38.6347	33.4037	35.1406	32.2894	42.9759	38.5375	39.3368	42.5155	32.1673	32.462
Aco015423	30.6108	25.7518	42.6623	26.4269	42.202	39.3915	36.7714	36.0031	38.6383	35.7814	35.126	27.4408	40.2556	39.246
Aco018840	41.9382	35.9707	33.68	36.6133	31.1162	41.677	37.1431	27.4865	36.6708	37.4703	37.3067	40.2743	24.4285	32.7417
Aco016135	38.6549	32.0581	35.3187	31.9182	32.3503	37.7471	31.6457	33.6275	38.251	30.4247	41.5384	34.7869	38.812	32.84
Aco028175	32.9538	31.8926	34.5756	29.3038	42.7731	40.3034	35.551	32.0194	38.069	36.7715	37.6502	31.6212	34.6452	30.9344
Aco023424	30.3429	34.5525	34.8418	31.3565	29.7047	38.0823	35.9238	37.496	35.6887	40.7149	27.6759	37.8063	33.3119	40.0443
Aco004120	34.0099	38.2737	27.3986	41.2827	38.9793	36.9551	25.7325	37.7562	30.7723	38.7592	31.4091	37.8608	29.1022	28.585
Aco002512	39.2213	37.617	30.2487	36.1532	27.1583	41.2912	29.1768	30.0366	30.3735	38.3866	35.1851	34.1288	35.5212	31.3032
Aco012502	39.1858	41.2833	36.8851	14.7829	39.0764	37.992	25.5165	36.8202	37.1447	34.9967	36.9236	25.394	38.8332	29.1976
Aco028573	37.5864	39.9263	31.4438	27.4687	36.4027	34.9855	31.6828	29.5488	34.5743	31.5023	31.8721	36.4101	37.4988	28.641
Aco015163	35.4765	35.3927	38.3166	27.285	38.3998	23.8475	26.078	34.3861	36.432	34.0785	30.6754	26.8138	32.0808	29.7824
Aco017977	31.5687	32.982	28.7942	19.4523	32.0652	34.8668	36.2966	28.9317	34.4032	34.7122	28.9071	32.3989	30.4921	33.1437
Aco000826	31.184	33.7995	34.3011	24.193	34.8704	32.4156	33.8736	29.253	32.0071	28.7563	27.6024	36.5778	27.555	30.3521
Aco004566	30.8887	31.5017	27.5593	33.3294	33.4529	30.5373	26.7139	30.3811	35.4452	28.913	32.7793	32.4324	32.6768	30.0561
Aco004802	25.6798	32.9079	27.2584	29.2013	34.8435	36.3047	27.5327	31.0797	32.9419	36.8567	24.2928	30.8372	32.3256	32.3474
Aco006966	33.6934	31.371	22.7691	37.6254	30.4339	34.7742	17.4435	34.3027	33.5168	35.906	30.8548	34.1405	29.9735	23.4561
Aco003247	34.0435	36.9839	30.7939	18.5512	30.7615	30.1064	37.5694	23.5972	36.9521	30.9223	30.8012	32.472	24.3235	32.3788
Aco003990	31.54	32.5043	25.8205	27.8294	33.3794	37.4698	28.0384	32.6551	33.3152	33.3444	28.3336	28.5579	29.1371	27.0518
Aco010551	36.4168	31.6908	26.3058	21.3765	29.5458	35.2414	34.3952	33.2376	34.1386	27.6722	30.6674	32.4986	23.7248	30.4164
Aco001739	30.0771	29.3247	32.1449	29.2776	32.9618	37.1065	30.1899	31.1559	27.6205	29.1885	28.4919	28.8508	24.3532	33.0649
Aco004021	30.0747	28.699	28.7597	27.2695	29.0099	35.7325	34.9701	30.6485	33.2558	27.9051	27.0624	30.3313	26.2051	29.8818
Aco026331	32.2622	33.8197	30.4286	27.171	28.6021	28.5168	29.1014	31.1541	28.2828	33.9973	30.377	36.1626	23.4541	24.4712
Aco006072	28.1584	32.8062	25.3457	28.6941	31.4838	32.2917	25.8665	30.7802	31.0233	31.6317	24.275	29.8641	27.7961	24.8852
Aco021166	29.8486	29.2398	26.1718	27.2616	31.9324	34.1	30.975	24.4215	29.0767	26.3181	26.6519	27.6484	28.4	32.1467
Aco000832	34.1782	31.875	28.5388	4.67354	34.3049	30.0783	30.2365	29.783	34.6333	24.4192	28.4724	33.514	25.8723	33.3861
Aco010192	21.2209	26.5768	29.5566	19.7091	31.1354	33.7264	34.9826	34.8403	31.0201	26.9134	21.3565	31.8136	31.8529	28.8795
Aco015383	26.0096	30.5424	28.3312	26.5003	31.901	27.3698	24.1665	32.2666	33.525	29.177	23.295	27.5761	29.4398	26.4115
Aco001428	29.0233	34.3064	25.7135	28.9874	32.2735	33.5116	23.7641	28.8775	24.0651	32.0608	30.0028	29.4601	20.4372	23.6835
Aco003429	23.2311	33.1358	25.6196	25.0573	28.666	27.0659	32.4783	27.7839	27.5577	23.2359	18.4801	31.5185	33.4948	33.4047
Aco000306	24.6076	29.0672	33.1316	24.0672	25.5572	29.3086	32.8947	27.6945	28.977	20.6638	27.3107	34.2092	24.574	28.4601
Aco013910	28.8849	26.4351	27.392	27.3844	23.9767	33.5247	31.8755	29.2733	26.6326	20.9005	26.1261	29.2512	23.1436	33.1192
Aco007126	33.1716	26.0363	28.1088	22.9768	29.0352	24.9859	24.1369	27.8593	31.883	24.1573	33.1702	23.1642	30.8263	24.1351
Aco005320	29.0691	26.661	29.2942	15.6512	25.8796	25.2343	33.5132	25.8623	31.7994	21.6609	32.0495	30.3658	24.4648	31.1042
Aco004419	22.772	28.4569	31.3853	22.2126	23.7871	33.553	24.1607	28.8747	26.9874	31.6881	25.5541	26.3661	29.983	26.8174
Aco006850	23.0106	30.5658	25.3704	26.0315	25.6628	28.9906	33.1484	21.8464	28.9861	31.2007	19.691	30.2429	24.9649	32.7627
Aco023256	23.1042	29.7936	27.8321	21.9805	27.5494	31.0187	30.802	26.3339	25.1025	24.3216	24.4665	31.4485	30.3849	28.0975
Aco024054	31.744	31.3472	22.0429	22.1048	26.2786	28.3881	22.0126	26.2137	26.6598	28.9707	27.7089	32.722	27.0961	23.2821
Aco028343	30.0266	29.031	26.8369	22.918	30.1107	26.1289	30.084	23.6061	23.4158	29.3887	26.1583	23.5406	24.362	28.6566
Aco012421	23.681	27.041	24.7004	13.9932	28.8301	32.2316	25.8262	32.3965	25.0097	26.4969	24.9174	29.6391	30.264	28.968
Aco024486	21.9378	24.2131	23.0954	32.0735	28.4347	28.7181	27.3183	31.425	20.2445	21.3744	23.1519	27.1935	30.0015	27.3098
Aco012824	15.7299	17.5861	26.564	30.5424	27.1183	31.656	26.0959	31.5008	27.3894	28.582	16.2468	30.587	28.5156	28.2338
Aco020893	23.0848	20.4019	25.6765	19.2078	27.5754	26.4427	30.5722	24.0867	27.9667	31.3595	22.1254	31.1866	25.0252	30.558
Aco001586	20.9189	27.2235	24.0096	31.4346	26.0347	27.5614	30.7074	22.7424	28.6395	25.2171	18.5475	27.0625	25.9846	27.014
Aco001991	31.3831	29.9013	23.3285	23.5749	26.479	27.2221	21.4129	25.0413	28.3332	23.9991	26.4063	27.9626	23.417	19.6454
Aco011637	26.3186	24.1943	29.4814	18.3491	23.3387	29.8791	24.1463	24.6164	24.8005	27.1961	28.4138	27.2706	26.527	22.0779
Aco021718	21.4772	21.6691	25.6511	26.5392	25.2738	26.3404	30.4325	23.4336	26.2269	25.1185	20.3173	29.4012	23.6945	29.4472
Aco025610	20.5345	19.5715	21.653	22.275	26.9773	28.4007	27.3886	27.3149	22.8941	23.5283	22.8645	29.9937	22.7164	29.9859
Aco010332	25.7956	22.0493	19.8866	26.7134	29.5195	28.5693	22.2412	24.2778	25.7284	22.0807	23.3089	25.2297	22.5538	25.152
Aco002986	25.9226	19.9199	25.809	18.4074	21.6798	25.9498	29.5163	29.5885	25.0299	20.6497	20.8588	26.6703	23.3864	29.4961
Aco009938	22.5969	22.3585	24.967	18.9022	27.1818	28.1212	22.0223	23.6066	24.3469	29.8892	23.0243	29.8405	20.3832	24.8719
Aco018666	27.3968	27.6703	21.9268	21.9478	23.7682	23.6558	20.3252	21.6127	24.5832	28.1896	26.3223	28.0207	23.9707	18.4798
Aco014973	24.9252	26.0817	24.9042	16.3719	24.0578	20.8263	22.5324	22.894	27.9487	17.7834	26.5652	28.5688	27.7698	26.3066
Aco000330	22.3045	20.0987	29.3024	26.2298	24.5683	26.5005	23.0249	24.2068	29.2614	24.2173	25.4309	20.3487	22.7983	18.0082
Aco010306	20.1625	20.6735	20.4339	19.4112	27.9279	28.9455	28.0321	19.4137	28.4217	21.8396	21.0338	22.8989	28.4076	25.5243
Aco004900	15.8442	26.21	27.7061	27.2213	22.3983	18.9529	23.2437	18.2308	27.1787	27.7814	19.2831	27.7311	20.9848	27.568
Aco017021	20.6307	23.53	26.7128	24.6159	28.2255	24.573	21.3756	22.1189	25.0222	23.3401	23.2821	21.591	21.1707	23.5108
Aco021371	19.0296	22.9733	20.3399	20.8911	26.2399	24.8708	27.606	25.1733	23.0016	23.4886	18.6768	22.5983	26.586	25.2284
Aco017180	18.5105	21.3232	27.0467	26.4719	23.3464	26.6415	22.087	23.3352	18.5118	22.787	19.8416	27.6588	26.0433	20.8067
Aco003982	27.0318	26.5081	19.268	20.439	24.3929	25.916	20.7926	22.3398	20.1978	26.9613	19.8899	23.2753	20.581	19.2507
Aco010700	24.7082	23.7883	25.514	14.7144	22.1538	20.6036	22.8657	18.3927	26.0022	21.9824	26.5536	20.5029	19.1598	23.187
Aco015263	18.6527	20.5588	23.0511	21.4254	22.8918	27.0834	21.0476	23.2895	17.3916	26.8319	17.7714	24.0095	19.1188	26.2734
Aco022973	26.2382	22.3615	23.9776	21.4976	22.9066	23.9441	10.4792	22.9056	22.9503	26.4149	25.1555	21.2525	20.5296	18.7105
Aco015786	21.4113	22.3121	23.5947	18.0366	23.5716	22.8166	21.3268	22.5893	23.6008	18.4309	21.9088	25.4508	21.5758	22.1092
Aco022312	22.7193	22.178	24.4506	17.5492	19.9995	22.2268	21.5922	21.9317	19.5301	25.4809	24.4777	24.3607	20.6912	17.9518
Aco027564	21.1161	17.7469	20.2574	22.3354	22.5081	26.5628	19.9051	23.6425	19.9193	20.6248	20.132	23.4229	22.5501	23.2606
Aco026735	15.6561	22.7706	25.5682	16.9578	23.0958	23.6937	19.3419	20.3773	24.5058	20.4776	17.4496	21.348	23.9318	21.6166
Aco027023	22.9603	19.3693	24.88	16.693	17.8328	19.9753	25.0186	18.187	22.0275	22.2039	16.8489	23.6165	23.0793	23.8817
Aco028822	21.7815	25.4418	16.6189	20.8321	22.9786	25.6715	20.5745	24.2593	23.0661	24.0251	17.0105	13.3542	16.362	24.5568
Aco000501	17.9591	19.0537	19.716	23.7182	23.9933	23.7364	21.8245	18.4319	22.4841	17.782	17.3798	20.1176	21.3072	17.6055
Aco000130	12.0477	17.8763	15.3303	23.8116	21.8474	23.5455	24.0877	23.1762	19.7844	24.8553	13.8957	22.3778	19.0803	21.863
Aco021690	22.7716	22.2169	19.9686	10.9935	19.5125	24.2503	18.6372	19.6674	21.0788	20.5339	23.4324	24.2107	19.9389	15.7763
Aco026652	21.2741	18.0917	21.4376	22.5512	20.588	24.3867	20.3548	17.9658	21.5303	17.806	18.5921	14.4436	20.6593	20.8535
Aco031283	17.4722	19.4642	16.0559	12.458	19.0568	23.8884	20.8038	20.5616	20.6216	22.4763	16.6029	22.156	21.829	19.421
Aco011664	20.6064	21.0937	18.7194	14.7505	23.646	20.207	17.0982	18.0597	22.7749	18.8638	17.2652	18.2995	21.1483	17.9832
Aco004400	20.3878	17.0551	18.243	16.8876	19.8802	21.8353	19.674	14.733	17.7555	20.3182	17.2183	22.8446	18.1876	20.41
Aco024142	15.4989	16.3023	19.731	16.228	18.7841	22.7123	20.0037	18.5083	18.4302	20.8108	14.6075	22.1685	14.5799	20.6294
Aco009643	19.5085	16.0934	17.8206	14.2511	20.1515	21.7278	19.9604	19.0186	18.2824	13.6841	20.304	19.3693	18.0296	18.0285
Aco015247	13.4455	16.3202	17.2821	17.8189	19.7224	21.9067	17.7186	17.5126	16.7871	18.9246	14.2234	21.4151	21.2696	17.725
Aco004804	17.7394	14.8572	19.0435	20.7443	22.0627	18.9522	15.9535	18.7486	19.5901	11.6008	18.0365	21.0588	16.4747	16.8253
Aco012330	15.383	15.8226	19.7934	13.5811	19.4455	20.9852	18.3538	20.1716	15.7941	19.6952	17.1808	16.8579	20.9003	17.1693
Aco015709	19.4068	10.2621	17.6976	18.5956	21.8368	19.5406	18.599	20.0546	14.17	16.1281	15.9834	20.1613	16.2641	20.7854
Aco017827	16.5233	15.6358	15.7275	17.2662	20.8563	21.2107	14.7336	16.0348	16.6407	21.7273	15.9547	21.5394	18.3051	16.5052
Aco020456	16.2498	19.3342	14.3594	18.9647	16.5218	17.4911	16.6303	17.6354	18.7243	17.2794	14.9697	17.7005	18.279	16.5678
Aco000336	18.9061	18.9846	14.2117	12.1278	16.2657	18.5531	15.5222	14.6862	16.2067	18.3837	15.8038	13.569	19.8613	15.0236
Aco020979	19.272	18.0278	15.7114	12.5238	17.3829	15.2708	13.0806	12.7701	18.2653	17.4259	18.6852	16.8694	14.4126	16.4579
Aco025138	12.9958	11.8894	15.9239	12.0683	17.0514	18.5392	16.9925	15.6579	16.3046	17.7035	14.91	16.4713	19.1526	13.1023
Aco002978	16.6762	12.5579	12.7723	13.6079	17.3485	15.8424	17.1105	18.9733	15.1149	14.1142	16.2358	18.4393	13.3847	16.23
Aco030240	18.2257	16.0932	18.5653	7.26155	18.1356	17.9113	12.5133	18.6007	12.6759	17.2987	17.96	9.46363	18.7447	12.5961
Aco009403	15.3207	15.0858	13.3341	12.9522	18.8639	18.3512	16.1232	18.0541	14.8114	13.3779	13.9121	18.229	12.7783	14.6504
Aco006641	13.0701	15.9582	14.0013	12.4901	14.8164	14.4011	14.8312	14.8865	14.9675	16.6181	11.0766	17.0183	13.7508	16.0199
Aco009549	15.6297	14.9052	11.224	16.6035	15.9937	16.7428	12.7452	13.1444	16.0026	15.6046	13.6966	16.5695	11.7936	11.5913
Aco009159	14.7401	15.778	12.5263	11.7452	14.5999	15.7875	13.2334	11.9917	15.1943	14.9746	14.1652	12.5869	13.4182	14.0681
Aco019486	13.8282	15.1886	13.0992	14.2402	14.1019	14.1601	14.5641	11.0748	16.8164	12.9686	13.9123	11.5838	11.955	15.5533
Aco000469	12.6286	16.5595	13.3229	13.8331	16.6318	14.8599	12.0539	11.0885	16.0854	14.1165	13.625	13.8869	14.1259	8.56272
Aco012245	12.2342	13.8218	13.2886	11.7322	10.1143	13.873	12.0714	16.1078	15.7983	15.7404	12.6467	14.2416	11.582	12.5451
Aco003283	14.1053	12.8525	12.6757	15.1475	14.2244	11.122	12.8102	12.6151	12.5377	9.54118	12.0813	13.1855	10.8721	13.003
Aco003591	11.8657	9.51165	13.9309	15.0901	14.1132	14.7747	9.2587	11.8969	11.8968	14.6511	13.2632	10.3738	14.1334	9.97296
Aco022167	11.8668	10.5966	11.1052	14.8659	13.5053	11.828	13.4922	13.6257	11.4028	11.7824	9.77969	13.193	14.9851	12.5486
Aco021007	11.0312	12.1676	12.8885	7.48757	12.8425	14.1389	12.5335	8.83149	13.773	13.903	10.5038	13.3254	11.059	11.0983
Aco010270	11.4916	11.3217	13.3329	13.268	12.7934	11.5511	11.8966	13.0739	12.0165	10.9865	10.5492	9.41209	10.2274	10.0318
Aco027746	13.8802	12.1301	10.1828	6.49005	12.4101	12.6373	11.2049	11.3082	10.6508	12.9672	12.8	11.5798	11.9471	11.686
Aco029803	12.9603	12.6608	11.0164	8.53194	9.33393	12.56	10.7501	10.8989	11.3535	10.9408	9.79614	14.0716	13.9435	11.6898
Aco015230	10.7327	9.79821	11.8754	11.8007	9.8037	13.3321	12.6504	9.31921	11.5384	12.2842	12.1115	12.8888	9.78953	12.4571
Aco016803	11.2775	12.9152	9.29016	12.5348	10.0709	12.7119	7.7856	11.7368	8.50546	8.51647	10.3285	11.8534	9.84322	10.8194
Aco017981	11.347	12.2766	9.96807	8.6409	10.2102	12.7924	8.14357	10.7862	12.5415	9.75244	9.76131	10.9412	12.4525	7.31761
Aco003347	8.20907	10.1571	9.8227	9.87872	10.8323	12.3802	10.1462	10.8524	10.029	11.7639	9.15403	9.65404	11.5194	11.8817
Aco017079	11.8537	11.9391	10.4312	5.78322	11.6634	11.825	9.5227	9.96307	12.2838	9.26017	8.58349	12.0571	10.0867	10.6251
Aco023277	10.4748	8.73287	9.03221	8.73101	10.5901	10.6325	10.2378	12.515	12.0332	11.8821	10.6342	9.35535	12.6784	8.28556
Aco026012	8.96578	10.5729	11.4271	9.91156	11.9427	11.5251	11.0348	10.0163	9.89183	11.2234	9.11877	10.6925	8.38851	10.3203
Aco006255	7.31525	9.3943	10.7951	8.4871	11.8085	11.2311	9.27947	11.5282	9.40887	11.8242	8.11826	8.51725	10.6665	9.70939
Aco026657	8.38822	7.5076	9.2843	7.71953	10.766	11.9211	11.8348	7.7264	11.6773	10.1082	8.38265	10.7882	9.98366	11.082
Aco027872	11.0757	10.3414	10.1244	8.35662	9.95477	11.5415	8.76439	10.8224	11.0073	7.2592	9.86178	8.62886	9.01779	9.46141
Aco020850	11.4468	8.63239	9.37464	5.50409	10.2117	11.2498	9.49836	9.94367	10.0339	10.5305	9.50263	7.81154	9.78265	10.7311
Aco002065	8.04368	8.01601	8.48953	10.3014	11.0043	10.7133	9.36994	10.7895	8.87755	7.73452	7.18013	11.0254	10.4274	11.2604
Aco028879	10.3263	8.49342	8.66583	10.4351	10.9759	11.1046	7.84494	10.8488	9.72415	9.54989	8.64653	10.0124	8.51325	7.52942
Aco001521	5.21604	10.4585	8.44673	8.98443	9.27595	9.05522	9.09175	10.011	8.67549	7.71687	5.57233	10.7056	9.11277	10.3872
Aco017482	9.53702	7.14332	7.50202	8.65155	8.78709	8.18669	7.03115	6.98399	8.68087	6.01472	8.91706	7.59767	7.99121	9.19643
Aco002741	7.37266	9.43256	7.11481	7.94903	8.42143	9.22787	7.33515	8.31908	8.43901	6.059	8.76089	8.70913	7.44328	5.67606
Aco027432	7.38166	8.43653	8.21108	5.68792	8.08094	9.15822	6.88933	7.75249	8.50248	6.22935	7.38179	7.62383	7.53512	8.35662
Aco000807	7.14822	8.25827	6.90981	8.27976	7.32089	8.86909	7.87971	7.21003	7.03906	7.3505	5.65736	7.25654	7.97083	8.91008
Aco029610	8.76697	6.7519	6.95215	6.61035	7.18593	7.7936	6.80155	8.50167	6.1535	7.01158	7.25247	7.49913	7.27199	6.91371
Aco027022	5.55987	4.81373	4.83578	6.69286	6.37392	7.58926	7.20458	6.78381	6.10283	6.43966	4.28177	7.35536	5.56363	7.01594
Aco003648	5.18342	5.73183	5.27406	4.02082	5.39998	5.85144	5.17751	5.12958	5.00566	5.75158	5.14876	3.1291	6.33728	5.81289
Aco031020	3.06971	5.20047	6.10948	5.95665	5.50193	5.36476	5.65558	4.81651	4.8414	4.91171	4.69505	3.89948	3.94147	5.8699
Aco019987	3.67988	3.74882	3.98017	3.90213	5.04738	4.86902	5.25292	4.40467	3.34645	4.27219	4.29844	4.58873	4.98036	4.68822
Aco016662	3.46666	3.44932	3.20236	4.32941	3.67161	4.09843	4.06333	3.32422	2.96275	3.03031	3.62887	3.61691	4.39085	3.97548
Aco011859	3.03903	2.0074	2.80892	2.80895	2.99775	3.17685	2.13366	2.94346	2.46223	2.85559	3.26343	1.95093	3.25167	1.93657
