# Supplementary material for: Comprehensive tissue-specific transcriptome profiling of pineapple (Ananas comosus) and building an eFP-browser for further study
Source: PeerJ. 2018 Dec 4;6:e6028. doi: 10.7717/peerj.6028 (PMC6284516; doi:10.7717/peerj.6028)
Supplement: Supplemental Information 9 [file peerj-06-6028-s009.xlsx]

## Sheet: Sheet1
Table S3. Expression patterns of consititutively-expressing genes of pineapple during fruit development
GeneID	Bract_1	Bract_2	Bract_3	Sepal_1	Sepal_2	Sepal_3	Flower_disk_1	Flower_disk_2	Flower_disk_3	Receptacle_1	Receptacle_2	Receptacle_3	Ovary_wall_1	Ovary_wall_2	Ovary_wall_3	Placenta_1	Placenta_2	Placenta_3	Ovule_1	Ovule_2	Ovule_3	Stamen_1	Style_1	Core_1	Core_2	Core_3	Petal_1	Stem_1	Stem_2	Stem_3	Leaf_1	Leaf_2	Leaf_3	Root_1	Root_2	Root_3
Aco027564	12.4878	14.3243	21.1161	12.1382	16.2077	20.132	20.1187	16.0908	20.2574	15.5734	13.4753	19.9193	18.0974	14.5331	22.5081	23.6425	14.1016	20.871	26.5628	11.4251	17.7109	23.4229	23.2606	12.4632	9.65779	17.7469	19.9051	22.5501	18.5196	22.2267	11.6694	20.2857	22.3354	13.8698	20.6248	18.4705
Aco026012	8.96578	7.938	8.25286	9.11877	7.78845	7.44918	11.4271	9.56559	9.39876	9.89183	7.62431	7.11905	11.9427	10.0463	9.86079	10.0163	9.80094	9.55021	9.64086	11.5251	9.91517	10.6925	10.3203	5.69146	8.43195	10.5729	11.0348	8.38851	6.12555	6.48796	6.19734	9.91156	7.15394	11.2234	9.57403	10.0509
Aco015353	63.3962	54.6028	54.069	60.5039	47.3535	45.9174	51.5826	37.7377	47.0913	61.3248	40.279	43.4374	54.2007	41.561	41.9173	52.3737	40.7768	44.1313	48.9853	52.2166	45.3963	56.8965	58.6992	49.2937	28.788	60.0304	60.3753	58.5039	46.2296	36.2784	50.7256	46.8504	57.0689	50.8891	51.0677	45.7992
Aco031283	17.4722	14.8664	15.271	15.356	15.0046	16.6029	15.7724	16.0559	13.7472	20.6216	13.5287	14.4009	19.0568	16.5015	12.6733	20.5616	12.6812	15.5571	23.8884	23.3738	18.5718	22.156	19.421	18.6332	14.8258	19.4642	20.8038	21.829	14.8143	14.4163	12.0351	12.458	10.9192	22.4763	19.6589	21.2896
Aco012245	11.375	10.0697	12.2342	11.4603	12.6467	7.71876	13.2886	9.96042	7.16476	15.7983	10.4469	7.94512	10.1143	7.36838	5.72335	16.1078	8.03394	9.35722	13.873	9.62318	10.5481	14.2416	12.5451	13.8218	4.7513	7.91838	12.0714	11.582	9.80113	5.73131	10.185	11.7322	10.7172	15.7404	11.1588	14.5085
Aco009393	70.282	69.8964	77.3966	66.7439	73.3671	75.7271	59.331	68.1818	92.3517	78.931	60.1112	82.3532	73.8552	59.0294	73.8655	53.2037	52.5264	65.4576	71.9884	54.5671	49.2879	77.3405	76.8381	81.3383	72.2034	91.167	81.958	84.1933	92.3253	89.6288	57.4648	53.2412	53.453	80.0279	75.7848	76.365
Aco018004	53.6036	58.9697	56.7282	45.6668	47.5165	51.3941	54.424	57.9188	46.3183	65.5803	63.8053	48.1717	61.768	59.3638	39.8439	54.9475	48.7588	39.3815	52.4367	35.2151	34.2001	70.4725	61.3937	57.3887	40.7724	51.288	56.2262	70.2879	71.802	57.9957	45.6105	43.7238	45.4594	58.2613	56.413	54.9803
Aco019987	3.07346	3.31169	3.67988	0.663123	3.71141	4.29844	2.77032	3.55716	3.98017	3.34645	2.65203	3.20743	5.04738	4.12591	2.62901	3.89469	4.40467	4.24963	4.86902	3.39552	3.34924	4.58873	4.68822	2.3323	3.2593	3.74882	5.25292	2.84444	4.33958	4.98036	3.90213	3.82628	3.67797	4.27219	3.86332	4.2614
Aco013910	28.8849	22.0632	25.6552	24.4319	26.1261	22.6242	27.392	23.8659	21.0631	26.6326	15.9302	19.2115	23.9767	19.8766	21.4334	29.2733	19.4419	19.3932	33.5247	21.2693	19.0192	29.2512	33.1192	26.4351	13.5326	24.3319	31.8755	23.1436	17.4497	16.7787	25.2001	24.6921	27.3844	20.9005	19.292	20.1072
Aco017826	38.0558	43.0876	52.0474	32.7422	35.1749	50.2342	28.3346	43.7322	38.5202	41.9459	39.5789	44.9883	42.9995	45.3937	34.2803	30.094	40.5159	41.5931	36.9318	45.3443	47.4696	29.0131	31.0021	51.8352	35.6672	48.3852	29.6684	36.9546	36.3738	45.7023	29.5842	30.5765	32.4264	43.2527	48.2813	45.8813
Aco015423	30.6108	23.6541	21.8757	35.126	23.7006	23.3823	42.6623	19.5775	20.1533	38.6383	19.5226	20.2192	42.202	20.0532	18.3096	36.0031	19.1281	22.3738	39.3915	18.7706	17.2272	27.4408	39.246	23.5334	15.7709	25.7518	36.7714	40.2556	33.2818	22.8412	24.6497	25.7961	26.4269	35.7814	35.3487	34.6519
Aco026652	21.2741	16.764	15.6912	18.5921	15.4468	16.3949	21.4376	14.5744	15.2046	21.5303	11.2011	9.52046	20.588	11.0985	14.0732	17.9658	13.8775	11.194	24.3867	16.6758	17.1622	14.4436	20.8535	14.5891	12.988	18.0917	20.3548	15.1664	18.4155	20.6593	18.2982	22.5512	22.3255	16.9299	17.806	14.1109
Aco026193	48.4255	45.7156	63.9521	44.7063	38.6441	47.3462	55.9711	42.3482	58.4066	54.4893	45.6837	66.7072	63.4039	39.6497	59.6033	59.6576	35.6518	58.4758	55.2268	29.8028	37.3551	74.6442	79.7167	56.9574	42.404	74.0528	78.2185	75.3547	54.6418	39.4105	56.4554	54.7742	48.2454	82.0148	66.0494	60.4854
Aco023277	8.66539	10.4748	9.48627	10.6342	9.17348	6.49523	9.03221	8.54749	7.69629	12.0332	11.7732	8.23341	10.5901	8.91542	7.82035	12.515	10.3561	7.60611	10.6325	8.77463	10.3044	9.35535	8.28556	8.73287	6.06961	8.72481	10.2378	12.6784	10.1755	9.21023	6.90672	8.73101	7.64893	8.46598	9.17706	11.8821
Aco021690	22.7716	21.1388	16.6672	23.4324	20.6545	18.1436	19.9686	15.8354	14.5282	21.0788	14.9189	16.5468	19.5125	15.3649	13.646	18.264	19.6674	16.8904	21.6044	24.2503	20.0817	24.2107	15.7763	17.4032	12.4072	22.2169	18.6372	19.9389	12.9589	15.6993	10.5604	10.3185	10.9935	19.6566	20.5339	20.3429
Aco021007	9.49843	11.0312	7.93836	10.5038	9.90445	6.83972	12.8885	7.39824	7.09037	13.773	6.89224	7.95069	12.8425	9.45067	6.03318	8.83149	7.61188	8.48569	10.0183	14.1389	8.13924	13.3254	11.0983	10.7908	6.07492	12.1676	12.5335	11.059	7.53852	7.30765	7.48757	5.80176	6.53245	13.903	11.4743	13.4073
Aco016662	2.42732	2.62027	3.46666	1.78367	2.92749	3.62887	3.20236	2.25121	2.68751	2.70051	1.84695	2.96275	3.67161	2.53551	2.18919	2.88154	2.65317	3.32422	4.09843	2.24485	2.25195	3.61691	3.97548	2.12039	0.93548	3.44932	4.06333	3.37629	4.39085	3.1141	2.8003	2.34798	4.32941	2.66157	3.03031	2.42042
Aco022312	13.2832	17.3198	22.7193	10.3933	19.2178	24.4777	14.4093	24.4506	23.8801	14.875	15.4609	19.5301	19.9995	15.0427	18.3149	11.3919	14.88	21.9317	22.2268	15.4585	14.2491	24.3607	17.9518	15.934	17.999	22.178	21.5922	15.0656	19.9194	20.6912	13.7783	17.5492	15.0499	18.4914	25.4809	15.2348
Aco018994	94.5211	104.871	95.9607	77.6749	96.9034	80.1658	66.9486	93.1622	69.1943	95.2131	83.4384	70.8799	75.9047	103.007	76.5063	58.2858	101.737	92.6085	75.9118	95.5763	108.121	83.0635	64.7999	100.84	61.4139	101.075	79.0804	72.7465	79.7958	83.2412	49.0298	41.8161	48.895	79.4257	89.4625	85.169
Aco028175	30.9194	32.9538	31.4479	37.6502	31.088	34.6057	31.0597	34.5756	30.2785	38.069	26.8544	27.3112	42.7731	29.712	28.4507	32.0194	30.0675	31.405	37.2997	36.3171	40.3034	31.6212	30.9344	27.5567	23.5799	31.8926	35.551	34.6452	32.699	33.5	27.8079	24.3109	29.3038	33.0668	36.7715	31.4793
Aco000336	15.7732	15.3103	18.9061	11.2819	13.5131	15.8038	11.6684	13.4998	14.2117	13.8675	16.2067	11.6975	16.2657	15.4221	10.7787	12.6317	11.2679	14.6862	18.5531	13.3849	10.6573	13.569	15.0236	16.5033	12.1291	18.9846	15.5222	15.1402	19.8613	15.7969	9.49516	12.1278	9.77819	13.9573	18.3837	13.9276
Aco015182	31.1767	31.6112	25.3897	36.1116	33.6066	27.015	42.5369	31.4292	22.7733	39.8939	33.935	25.975	42.8075	33.6081	28.5113	31.3054	30.3603	26.7427	42.315	24.7702	23.7837	36.0671	45.3936	31.0673	24.3204	33.734	40.8368	36.0132	24.6259	22.7583	31.2305	29.613	30.6764	28.8126	29.3483	24.5774
Aco024435	41.7973	45.9073	42.405	39.217	44.0499	34.2913	47.4009	34.9346	23.2862	39.7214	35.322	23.6455	49.7974	38.2583	21.885	51.1462	32.3587	24.4975	47.9533	28.1462	21.0528	42.5123	47.711	43.2041	26.5889	35.6142	48.4882	41.4834	37.929	40.7457	43.6909	46.9892	46.3674	32.7407	34.7626	38.6139
Aco004419	14.6286	11.8412	22.772	11.6238	16.3166	25.5541	19.5983	22.8884	31.3853	18.196	16.9592	26.9874	21.8365	22.0557	23.7871	21.9606	22.2644	28.8747	33.553	27.9492	28.217	26.3661	26.8174	19.9442	28.4569	26.301	24.1607	22.3936	29.983	28.5327	22.2126	20.9126	21.3439	31.6881	29.2077	30.7627
Aco013735	44.8722	49.9903	42.0023	45.1086	45.2902	40.3338	47.6149	45.8667	38.5905	52.0003	47.8711	40.44	44.2013	49.5647	38.7408	49.5969	56.2514	47.4575	53.8837	61.6387	51.3727	57.1236	52.4767	56.3165	38.1838	56.9878	47.3986	44.6306	35.8512	38.7559	63.3823	37.3125	50.1072	49.4323	48.9621	49.5277
Aco010811	66.9466	65.0448	56.5203	53.5341	55.5412	51.9909	74.0502	57.4173	49.2603	67.111	55.4124	51.5969	79.9609	59.4148	49.6243	69.7689	54.8176	60.3217	77.2976	58.5688	61.0057	85.6043	79.231	62.8212	50.3629	68.001	78.3802	84.5139	71.4057	54.6994	61.9837	67.6561	62.677	85.8724	75.9145	77.3393
Aco006850	23.0106	20.2947	21.6462	17.8083	17.4571	19.691	25.3704	17.1429	23.425	28.9861	15.5544	19.652	25.6628	14.5812	19.3381	20.4482	12.9681	21.8464	28.9906	22.1475	18.3872	30.2429	32.7627	17.6037	15.515	30.5658	33.1484	24.9649	19.318	15.5444	23.1314	25.3032	26.0315	31.2007	30.698	28.4365
Aco012203	84.2842	82.7444	79.426	84.4649	70.985	79.4899	125.145	72.3836	73.1842	86.6095	71.7354	73.7609	92.0185	70.1845	75.7276	129.864	79.6504	90.1243	120.118	73.2753	96.1031	130.437	122.417	84.9566	55.7746	97.9369	116.338	117.73	88.841	71.5918	96.7444	105.87	114.109	106.935	103.382	100.192
Aco009643	12.9044	14.2948	19.5085	11.3961	12.7635	20.304	17.8206	12.7626	14.0826	18.2824	11.75	15.5111	20.1515	12.8339	15.4993	19.0186	10.8234	14.9529	21.7278	7.45172	12.5206	19.3693	18.0285	12.2372	10.4241	16.0934	19.9604	18.0296	16.1022	13.2731	11.1496	13.4077	14.2511	13.6841	13.6682	12.729
Aco027746	10.8783	13.8802	12.1	9.7705	10.8073	12.8	10.1828	9.87948	7.23866	10.6508	9.23542	6.86381	12.4101	10.4956	7.33119	10.5095	11.3082	8.52911	12.6373	9.35741	9.70728	11.5798	11.686	12.1301	8.34453	8.24317	11.2049	10.5206	9.59518	11.9471	4.34403	6.49005	6.27468	12.1186	12.4461	12.9672
Aco003726	32.8111	39.4832	20.943	37.059	39.9292	25.8546	44.0105	33.6087	22.6093	48.6236	39.0708	20.8088	44.8186	41.2619	22.4106	34.7953	40.6627	28.1733	46.7838	36.7222	21.673	46.8985	37.4099	36.0888	31.6702	28.8122	44.0961	26.4477	29.4979	33.6981	20.0062	13.2746	15.1817	31.5162	31.9432	30.2746
Aco015230	9.82412	10.7327	9.55172	6.9333	10.6071	12.1115	8.03223	11.8754	10.8553	11.5384	7.95867	9.89276	9.8037	6.66496	9.54497	9.0068	9.31921	9.11012	13.3321	12.8681	11.2388	12.8888	12.4571	8.16343	7.36787	9.79821	12.6504	6.78432	9.78953	9.56195	8.7475	9.38683	11.8007	12.2842	8.96201	12.0502
Aco017079	10.1846	11.8537	11.3255	8.00215	8.58349	8.33082	10.4312	9.00563	7.50076	12.2838	8.07339	9.76307	11.6634	8.56034	7.97056	7.5867	7.16486	9.96307	11.825	8.41295	8.12949	12.0571	10.6251	11.9391	5.50934	11.0995	9.5227	7.00906	10.0867	7.73448	5.78322	5.35025	4.4766	9.11295	9.26017	8.37088
Aco021534	41.5782	52.5507	44.5601	37.8162	40.3175	33.6935	34.0681	33.1833	35.3479	53.3695	33.6021	35.4771	38.5221	32.2224	31.6923	23.4223	22.6872	35.5767	33.9426	47.7546	30.2609	54.492	41.4845	37.7229	22.157	52.1168	43.4744	41.4365	21.754	20.9065	47.3764	33.8322	34.9013	43.7905	29.6696	32.4673
Aco016295	62.6013	69.7886	57.752	62.3864	62.3225	47.0657	67.4985	44.4781	36.126	60.0218	48.4426	38.2918	63.8786	54.2647	41.0983	71.9684	54.0639	56.528	75.2226	46.0769	74.4242	58.234	68.9563	45.3306	29.5737	57.7169	65.651	72.5536	57.7243	45.9248	67.5913	76.686	70.9167	61.5549	64.4782	65.3368
Aco022973	21.6058	26.2382	17.8702	21.4624	25.1555	16.4455	23.3155	23.9776	20.1632	19.7983	22.9503	17.2642	19.7451	22.9066	20.4196	15.9835	19.0414	22.9056	23.9441	21.5531	22.6277	21.2525	18.7105	21.2964	15.162	22.3615	10.4792	15.6798	18.4893	20.5296	21.4976	16.7297	18.837	21.0219	22.6636	26.4149
Aco008289	474.693	442.491	484.823	586.961	472.796	416.639	667.151	377.847	617.105	538.138	471.335	805.696	652.411	461.334	773.631	839.036	430.6	673.455	597.258	406.925	565.313	848.965	788.187	518.632	480.887	664.847	762.737	574.335	501.811	502.19	803.473	537.288	640.058	532.513	582.052	583.957
Aco001586	18.5894	18.1201	20.9189	16.5792	16.5968	18.5475	22.1526	20.9842	24.0096	28.6395	18.519	19.7588	26.0347	17.0167	19.0761	22.561	15.9093	22.7424	27.5614	16.7298	15.808	27.0625	27.014	21.9839	24.5843	27.2235	30.7074	25.5369	25.9846	22.9927	23.5616	25.9592	31.4346	22.3699	25.2171	20.1597
Aco003982	21.916	27.0318	24.1786	16.4369	19.8899	18.698	19.268	16.7086	16.1729	20.1978	19.462	16.7366	24.3929	23.2341	16.862	19.7762	22.3398	20.9984	24.3906	18.2597	25.916	23.2753	19.2507	25.2136	15.5332	26.5081	20.7926	20.581	19.1657	18.4464	17.4941	19.7106	20.439	26.9613	25.3708	22.6195
Aco003429	19.0161	16.6472	23.2311	18.4801	16.6299	15.5899	25.6196	15.7709	21.8136	27.5577	13.375	22.475	28.666	13.5315	20.3399	27.7839	14.7086	26.1062	27.0659	19.434	19.6962	31.5185	33.4047	22.6287	17.9213	33.1358	32.4783	33.4948	25.1616	18.8055	23.8074	25.0573	23.1735	23.2359	19.0716	20.8286
Aco015786	17.6483	18.6941	21.4113	17.5005	18.6096	21.9088	19.0223	19.3063	23.5947	22.0633	17.6529	23.6008	23.5716	22.5231	22.8139	22.3513	18.7132	22.5893	22.5751	20.3988	22.8166	25.4508	22.1092	16.2292	15.4725	22.3121	21.3268	21.5758	19.3756	14.7855	13.1438	18.0366	15.6878	16.3178	18.2393	18.4309
Aco019486	13.8282	13.7762	13.801	11.1574	13.9123	13.5496	13.0992	11.1976	9.44824	16.8164	9.11311	9.36885	14.1019	10.9271	9.18445	8.83507	9.80608	11.0748	14.1601	8.72375	7.76044	11.5838	15.5533	12.7175	8.42581	15.1886	14.5641	11.955	11.2932	10.2986	13.9674	14.2402	13.5564	11.104	12.9686	11.637
Aco002097	72.3198	71.1206	95.4942	58.7773	76.3009	86.4149	67.7044	103.43	112.953	62.9457	100.353	140.239	100.875	106.906	140.063	133.547	142.726	137.609	109.952	122.688	118.918	99.9041	136.786	73.5751	123.198	108.073	104.737	106.298	124.102	142.23	119.168	99.4768	110.408	138.524	142.842	125.672
Aco003682	53.1724	64.6699	63.8258	56.6693	68.0425	65.4119	68.141	69.0207	85.9525	64.592	67.8466	73.9601	71.824	65.4881	70.7543	88.2785	61.8667	74.7022	91.211	88.8345	75.3405	66.2309	88.955	50.7241	72.8994	65.5394	84.999	82.6734	89.9414	96.4232	76.9081	80.4536	67.5813	83.2497	83.3618	81.6588
Aco006560	141.585	139.584	147.533	143.678	142.843	141.059	128.238	104.991	98.9951	135.268	108.761	85.5531	114.086	99.2814	90.2419	112.499	108.816	115.301	159.048	120.873	106.232	132.867	123.893	130.45	99.5268	125.602	126.514	122.823	136.691	108.968	102.627	122.518	128.502	139.079	144.793	140.082
Aco028386	65.1696	60.9565	78.8984	61.6133	62.3077	80.5031	54.2823	69.0464	85.729	66.8924	63.7688	88.2106	79.3519	71.8904	82.4216	65.1618	73.5363	86.826	94.869	47.9446	81.6778	54.3035	67.767	58.9057	54.5159	83.0904	62.497	90.7461	89.6008	82.4855	87.9758	98.6061	92.3771	77.5036	90.7632	93.1418
Aco006641	13.0701	10.3734	11.0163	11.0766	8.62053	8.23418	14.0013	12.4573	8.37356	14.9675	10.074	7.91953	14.8164	8.95796	8.9501	14.8865	14.5242	6.13657	14.1452	12.3079	14.4011	17.0183	16.0199	15.9582	10.4103	13.0594	14.8312	13.7508	11.2575	9.27598	10.6992	11.5968	12.4901	11.7111	16.6181	9.52647
Aco014608	73.6007	84.2399	79.3876	60.0168	76.9391	80.2163	66.6844	72.2498	63.1242	81.8074	65.0703	57.3023	81.6011	75.137	54.441	59.5611	56.3922	64.1047	95.3922	68.8361	56.2811	75.955	80.9412	86.6704	68.8754	84.4898	75.7083	83.9423	93.5004	90.1744	48.6946	46.9984	46.1758	82.1136	76.6311	71.1927
Aco002208	78.4544	76.6746	66.8875	63.6471	60.5783	54.6245	63.2779	58.2178	58.9154	80.1703	62.8922	52.3953	63.3236	56.0446	53.4296	52.3509	61.493	60.657	73.119	60.1214	57.4548	86.5621	69.1282	78.1485	42.0752	77.6746	67.2591	74.5967	86.7709	59.8229	79.7827	63.3588	67.7767	79.8644	80.0757	84.1795
Aco015163	35.4765	34.6915	29.4882	30.6754	29.3413	26.2363	38.3166	25.0028	22.4404	36.432	28.7837	22.4379	38.3998	22.4498	23.8949	34.3861	25.0649	22.2082	23.8475	17.8412	20.3159	26.8138	29.7824	35.3927	17.6717	34.7439	26.078	32.0808	19.7904	22.7029	22.3268	20.8264	27.285	32.191	34.0785	27.044
Aco024796	23.0986	30.8398	54.4267	19.2583	27.8721	51.9035	32.0408	36.8626	64.2975	30.8464	28.222	47.9621	41.9398	39.7875	57.0475	45.7934	34.2436	62.0345	61.214	34.7809	58.8754	37.6428	45.4507	26.2659	28.351	38.8988	49.9991	36.6647	65.0271	49.3489	35.7577	63.1566	40.4432	54.1734	65.2151	56.5827
Aco015709	16.6061	19.4068	18.0962	13.4565	15.9834	9.48737	16.165	9.92338	17.6976	6.43483	3.0788	14.17	21.8368	6.89843	13.9411	20.0546	13.6389	9.78326	19.5406	8.53467	12.5132	20.1613	20.7854	10.2621	7.59548	9.23791	18.599	11.883	16.2641	14.5419	16.5071	18.5956	17.0361	14.1319	16.1281	14.5885
Aco018424	47.4795	50.6294	47.4411	43.328	41.9305	44.2323	49.2922	45.2062	46.3641	55.4281	40.9531	41.8102	57.9756	54.1521	41.7881	38.5598	40.2185	49.0897	61.5407	64.156	43.9614	65.5697	56.7875	60.3508	44.4473	69.7872	62.0029	57.1056	49.0559	44.1082	64.4214	50.8507	59.2274	57.506	58.0759	56.0209
Aco012502	25.6517	39.1858	34.8073	26.5239	32.6147	36.9236	32.5229	36.8851	28.0696	30.5791	37.1447	21.7887	33.904	39.0764	25.4427	36.3038	36.8202	28.9937	37.992	33.2709	24.1943	25.394	29.1976	41.2833	21.0636	35.3015	25.5165	25.9036	38.8332	35.2552	14.7829	12.8102	12.3673	22.7742	31.4624	34.9967
Aco018120	38.2395	41.0445	36.7012	34.7024	40.1876	34.0801	40.8548	36.6098	34.643	38.0467	36.417	31.7768	39.7716	37.7707	35.3066	38.47	40.816	38.2206	51.4636	48.4149	37.9682	42.0793	40.155	44.7911	32.2017	49.5513	43.4072	42.9828	40.5486	40.3228	32.4112	31.2139	32.1141	48.884	45.9099	43.6814
Aco029350	89.2115	72.4361	105.544	72.4662	74.2227	93.3699	97.647	111.256	140.587	109.725	87.7962	132.764	114.602	86.313	141.273	121.816	105.332	127.092	112.57	99.6492	105.267	119.936	98.574	110.553	121.75	142.98	100.464	116.557	126.385	116.17	110.896	112.126	131.488	123.973	123.294	98.6809
Aco017987	172.715	152.989	201.874	159.357	143.757	185.928	202.339	155.566	205.175	198.687	143.096	203.286	210.455	150.123	212.237	199.911	166.737	216.846	235.292	212.469	199.507	258.529	240.997	198.382	173.304	274.157	247.533	250.641	245.617	198.221	156.088	164.137	167.61	272.85	249.649	251.857
Aco015890	31.3655	37.6064	32.026	24.1137	31.1658	27.1394	30.3653	37.1186	32.7529	45.7828	38.6994	29.1872	46.3616	43.1433	30.8514	30.5813	32.017	37.6972	45.6455	43.2599	33.9033	45.8542	35.0438	42.4525	26.826	43.8072	33.0115	34.8956	47.0209	42.6752	30.6868	30.0263	28.0886	41.2514	43.294	42.1789
Aco012330	12.1942	14.0574	15.383	11.0508	14.8385	17.1808	12.1698	19.7934	15.1493	15.142	15.7941	11.9971	19.4455	19.4118	14.2182	16.7381	20.1716	15.2564	20.9852	18.8772	15.9924	16.8579	17.1693	10.7876	15.8226	15.2592	18.3538	14.2017	19.6202	20.9003	12.9121	13.158	13.5811	18.2309	19.6952	18.4139
Aco000306	24.6076	17.732	19.4633	27.3107	13.046	15.3978	33.1316	13.6573	16.0902	28.977	12.6089	20.1496	25.5572	13.9622	18.8534	27.6945	14.3732	25.261	29.3086	15.9877	19.7692	34.2092	28.4601	21.6602	19.6006	29.0672	32.8947	24.574	18.2043	15.7945	20.2018	19.8579	24.0672	20.6638	17.7991	14.2814
Aco003283	11.75	11.7447	14.1053	10.5066	9.23636	12.0813	8.52316	9.49926	12.6757	11.4418	6.57508	12.5377	11.9084	9.34736	14.2244	11.8687	8.84761	12.6151	11.122	10.059	10.0527	13.1855	13.003	12.8525	8.1374	12.1787	12.8102	10.8721	5.14094	6.71343	14.7364	9.32794	15.1475	9.54118	6.62936	7.46031
Aco009488	179.641	149.821	176.496	156.959	142.271	173.414	241.585	170.639	206.451	211.151	163.976	229.357	238.307	152.13	227.75	273.669	159.536	219.198	237.554	168.519	196.73	277.121	280.338	191.03	234.272	254.002	247.167	267.036	286.282	243.941	152.839	149.436	164.257	246.995	261.961	268.285
Aco011933	45.8818	38.8387	32.0516	55.4538	43.7586	20.8586	42.1627	33.7876	27.6883	53.5114	41.5851	29.2802	44.0254	40.3831	30.6001	49.0792	47.2274	37.5952	47.4506	51.6482	48.2799	43.7365	40.5186	55.4443	53.8491	41.1816	30.4194	43.7417	31.881	29.4239	35.0813	42.342	42.3769	51.0368	54.6126	51.0963
Aco028343	26.6278	26.5672	30.0266	17.9988	22.4144	26.1583	20.6874	26.8369	25.8082	23.4158	22.0179	18.4973	30.1107	21.867	16.5185	23.6061	17.7061	20.1438	26.1289	21.5487	18.1076	23.5406	28.6566	22.5017	29.031	25.1441	30.084	19.0912	24.2872	24.362	15.4408	16.9902	22.918	26.719	29.3887	26.1557
Aco000826	31.184	28.4491	27.8253	27.6024	24.2148	23.3405	34.3011	19.8429	21.2879	32.0071	20.0317	22.8419	34.8704	22.2511	23.8639	29.253	24.2373	28.0602	32.4156	29.9897	29.5123	36.5778	30.3521	33.7995	19.756	31.6388	33.8736	27.555	24.8744	20.5077	24.193	18.7429	20.5356	27.6814	28.7563	27.1585
Aco011637	16.7254	21.0683	26.3186	13.1042	24.2353	28.4138	17.9934	29.4814	29.2226	17.7591	21.5046	24.8005	23.3387	20.3798	22.9486	18.3408	20.9301	24.6164	29.8791	22.6649	21.6986	27.2706	22.0779	18.9967	22.7629	24.1943	24.1463	17.2345	23.7856	26.527	16.4176	18.3491	16.4163	20.9831	27.1961	20.604
Aco029610	6.67777	8.76697	5.86206	7.25247	4.92565	5.41145	2.43491	6.95215	5.77937	6.1535	2.80364	4.33464	7.18593	1.09508	5.9291	8.50167	4.78924	3.556	2.9001	7.7936	5.49726	7.49913	6.91371	6.7519	3.34634	5.40532	6.80155	7.27199	6.12557	2.64152	6.61035	5.98565	3.46983	5.30375	5.56479	7.01158
Aco006323	223.784	196.392	195.057	241.035	173.082	164.278	321.498	156.812	170.762	233.519	161.643	174.737	251.044	160.572	174.676	313.258	177.645	185.161	333.684	132.611	216.215	286.433	320.803	192.89	132.962	207.876	310.8	297.565	225.631	176.817	180.398	219.943	225.56	269.529	235.225	243.731
Aco006255	5.24935	6.73103	7.31525	5.57621	6.36959	8.11826	10.7951	7.0992	7.07503	9.40887	7.77508	9.12755	11.8085	9.03111	8.79313	11.5282	8.30402	11.1521	11.2311	6.30218	10.5759	8.51725	9.70939	7.33766	6.53896	9.3943	9.27947	7.72892	10.6665	8.43611	6.44476	7.23983	8.4871	10.2915	9.72231	11.8242
Aco015383	19.5185	21.7252	26.0096	17.2382	20.3347	23.295	26.4187	25.961	28.3312	33.4395	16.1639	33.525	27.0892	18.1067	31.901	28.9874	20.0013	32.2666	26.9776	27.3698	24.9068	27.5761	26.4115	22.3009	20.8532	30.5424	24.1665	29.4398	25.3417	21.9253	26.5003	26.2506	21.5341	29.177	24.3818	23.5507
Aco007202	47.6471	43.632	43.952	34.6931	36.6653	34.8979	37.3083	41.6726	36.7604	52.0314	32.7051	28.8671	44.5919	36.6068	32.8443	34.5081	37.8177	34.0683	42.612	49.7993	38.6443	46.3636	39.0414	42.207	31.5141	45.2826	48.3875	42.3561	40.6484	32.1371	29.922	33.3551	32.7116	46.4968	46.8571	52.026
Aco018714	67.7002	63.9299	45.3569	61.3659	48.4696	39.973	59.2532	49.8026	37.1632	67.6914	43.4349	40.0092	63.0361	53.422	48.1944	66.4778	53.3416	56.7719	80.1952	78.4027	65.3436	66.9079	61.483	58.9088	39.8744	63.0607	61.6269	60.8173	50.3332	48.1389	61.1242	51.6717	59.52	80.7641	72.2069	77.974
Aco001465	110.93	102.586	74.8369	97.1138	91.19	64.349	99.8717	72.5433	49.3677	103.379	71.9487	44.1214	95.3036	76.9387	41.7881	83.4025	81.4546	54.2713	100.592	76.1218	61.6111	93.6031	102.658	86.6513	53.2089	72.5167	96.0599	69.3662	54.5158	52.4111	72.167	56.0317	64.2432	77.8148	81.4029	78.7103
Aco004279	119.657	154.786	193.839	104.46	141.14	169.729	117.067	148.394	146.267	155.845	141.774	162.72	145.523	154.836	169.33	114.284	160.754	218.839	137.584	146.266	196.096	162.932	137.148	129.699	104.193	206.84	135.114	184.794	176.103	152.799	215.885	164.556	182.538	184.652	192.945	197.698
Aco003978	30.8111	25.4813	35.4632	27.9039	29.4488	36.7797	38.2176	29.0114	31.4628	37.2641	29.0051	35.9172	43.4821	29.3105	28.0383	33.8086	26.2979	28.9071	28.989	33.289	33.0115	43.1789	32.4757	36.7363	31.1177	35.0545	38.1123	38.28	26.9626	32.9103	38.2701	22.9761	26.407	31.1946	27.0296	26.546
Aco006283	110.434	112.157	99.4796	97.0437	102.537	99.7076	102.426	96.0597	114.501	102.15	80.8979	93.8876	100.799	90.1023	98.1882	89.714	100.044	82.9637	113.95	127.944	103.86	121.141	105.338	116.332	72.3944	100.384	93.3505	96.6852	72.6078	68.7457	77.7838	68.813	69.8465	109.719	104.744	106.453
Aco028879	6.61014	7.81323	10.3263	7.37657	8.64653	8.6294	8.66583	7.90058	7.68292	9.72415	7.62462	8.37336	10.9759	8.51217	7.46284	10.8488	8.46998	8.74724	11.0051	11.1046	9.25683	10.0124	7.52942	5.98302	5.34971	8.49342	7.84494	8.45465	7.38661	8.51325	9.30933	9.98366	10.4351	9.31138	9.54989	9.22458
Aco000501	17.8227	14.4035	17.9591	17.3798	12.1385	15.0465	19.716	15.6525	17.3034	22.4841	13.4403	12.0093	23.9933	12.6163	13.0351	18.4319	13.6283	17.7306	23.7364	16.9852	13.7532	20.1176	17.6055	14.3766	11.8947	19.0537	21.8245	21.3072	16.4243	12.5447	23.7182	14.246	20.2402	17.782	17.2283	16.6585
Aco002512	39.1041	38.3407	39.2213	31.7069	35.1851	28.7497	30.2487	29.3604	29.4084	29.0736	30.3735	26.5896	23.9067	27.1583	23.0218	26.7519	30.0366	22.5551	21.138	41.2912	26.504	34.1288	31.3032	37.617	21.9702	35.9671	29.1768	35.5212	28.7206	26.7173	36.1532	28.859	32.213	38.3866	32.229	35.2068
Aco017989	123.179	107.882	133.754	111.156	98.3773	124.081	153.492	114.858	135.783	146.49	101.691	138.669	157.512	105.919	145.667	192.053	129.742	149.906	186.182	180.951	165.602	183.34	181.56	133.67	113.248	182.998	189.201	161.862	145.1	121.633	120.778	111.714	120.165	189.574	154.654	164.108
Aco009549	10.1471	12.0551	15.6297	9.27192	10.7207	13.6966	11.224	6.44732	9.80902	16.0026	7.57351	9.77203	15.9937	9.98172	10.0675	13.1444	6.02636	10.4819	16.7428	8.32661	8.64197	16.5695	11.5913	7.82065	14.9052	9.57217	12.7452	11.7936	11.0831	8.04158	16.4035	13.1199	16.6035	11.0585	15.6046	12.5657
Aco014157	61.8002	52.1536	54.2735	53.0952	54.3696	42.0372	47.163	46.2486	39.1115	55.2933	42.9214	38.5961	50.3351	40.3598	35.3141	52.6981	43.9618	34.8234	60.5085	57.3592	48.0148	50.5588	56.9234	51.7146	44.8808	45.8233	50.516	53.0308	52.9031	46.4334	44.7003	43.0551	45.9978	49.4545	56.5783	48.0507
Aco004139	255.947	232.519	247.367	228.8	206.421	227.059	288.948	189.532	203.54	230.862	201.023	210.941	218.431	171.827	186.609	282.64	184.645	173.349	266.872	120.221	166.627	260.791	280.303	223.904	145.189	245.139	284.084	291.933	261.639	186.203	197.718	230.937	232.203	202.172	220.439	183.611
Aco009394	86.8927	77.5066	92.7967	89.5036	67.5571	82.984	107.319	66.2837	87.4453	95.0057	64.783	98.564	110.431	66.204	92.5002	107.435	70.424	96.2186	116.94	66.5821	98.1599	132.976	124.079	92.5079	61.1199	128.528	119.858	137.952	101.162	73.5148	88.0597	107.226	123.026	127.927	115.025	121.928
Aco021572	44.0656	47.4104	43.4025	34.0472	45.0372	41.3718	38.0259	34.2623	41.9616	47.1152	42.5995	39.1553	41.1483	42.8806	39.3911	45.8702	39.1587	40.6718	42.359	54.2747	51.6628	40.317	39.5771	50.8081	30.0891	49.8661	35.4634	48.4892	49.175	35.0188	30.8942	33.443	35.8701	45.6617	45.4661	54.5871
Aco017287	66.2974	67.8929	60.717	56.4295	53.9543	47.9371	76.1057	47.7665	47.0213	64.2096	38.8135	46.3225	66.934	48.4681	50.1747	63.5529	44.9703	53.5087	81.4396	58.7395	66.705	86.3858	80.9496	53.9368	33.8796	68.0177	80.2941	63.7748	49.6873	43.472	60.8498	47.1903	53.1202	83.1283	69.7279	70.652
Aco003247	33.5854	30.8531	34.0435	26.9034	25.3695	30.8012	30.7939	23.0679	21.8991	36.9521	23.5934	24.343	30.7615	26.8862	20.9273	22.2749	18.7882	23.5972	30.1064	21.3012	17.6003	32.472	32.3788	36.9839	16.7488	34.7584	37.5694	24.3235	22.2684	21.9752	18.5512	15.3114	15.0647	30.9223	29.5742	29.7296
Aco014692	36.4338	33.1821	32.5143	37.6433	33.3662	32.0573	40.2984	28.5113	38.9795	43.9666	28.7388	33.0629	39.8625	32.4147	36.1777	36.9012	29.8655	44.9223	47.996	43.671	46.0503	38.6985	51.1215	28.8571	25.8823	47.0771	44.2559	39.2771	34.8682	33.1702	38.8657	28.9916	35.2062	48.0075	47.6393	50.2454
Aco010700	24.1711	22.8131	24.7082	22.8933	22.923	26.5536	23.2107	25.514	21.6887	23.3464	17.6297	26.0022	22.1538	19.8338	20.858	15.9518	18.3927	17.4309	20.6036	14.1198	17.7342	20.5029	23.187	23.7883	18.4397	18.1469	22.8657	16.5712	14.3343	19.1598	14.7144	12.4254	14.4689	19.4018	21.6838	21.9824
Aco006302	48.9755	39.6109	44.9611	45.6592	48.066	45.5685	45.5586	42.7047	35.3194	29.3149	36.0941	23.9403	43.4427	41.5887	34.4047	50.4697	48.1305	40.8871	44.8738	28.3298	49.983	40.6348	40.9956	38.1283	38.8229	49.7046	38.5992	43.1405	50.1871	44.1063	26.0671	32.6121	34.1876	49.4489	39.3157	43.5604
Aco014145	43.7732	42.7398	43.8539	32.7422	44.1197	35.1925	44.1398	38.441	43.9611	41.7559	25.7313	49.2279	55.183	37.1953	46.6959	56.7288	39.433	26.4329	53.4646	34.8319	43.4208	49.0707	42.8846	53.7128	29.3677	38.2307	40.577	47.9208	58.6154	49.8682	48.8125	43.6641	48.0202	49.2857	49.5725	46.7495
Aco010423	30.4402	39.4	42.3836	28.7748	37.9857	47.1806	37.0214	42.8171	55.905	45.294	38.9912	51.5841	50.8108	49.2891	52.3997	37.8022	30.2087	53.0659	54.3733	32.1964	33.3514	44.8716	49.7712	37.625	41.4697	49.6467	49.5837	51.0567	54.5977	55.3427	34.7119	33.3483	35.5951	43.8217	47.2148	42.3809
Aco002677	198.849	170.973	170.133	183.233	151.595	139.782	164.59	112.515	129.05	171.813	118.62	134.434	199.056	112.163	138.289	207.679	108.766	158.7	180.223	108.161	158.27	192.199	190.838	130.994	103.21	186.755	170.271	146.694	121.625	99.4268	152.469	131.114	139.454	154.88	157.189	152.093
Aco011859	1.27774	1.08777	3.03903	2.50802	1.64649	3.26343	2.80892	1.56522	1.73107	1.19898	2.26128	2.46223	2.40622	2.56971	2.99775	2.94346	2.53917	2.60517	3.17685	1.18653	2.37311	1.95093	1.93657	1.66785	1.75917	2.0074	2.13366	1.93367	3.17917	3.25167	1.39214	2.66168	2.80895	1.79559	2.85559	2.02269
Aco002746	93.1542	107.397	110.409	75.9728	97.34	101.611	79.1933	96.8354	96.9215	93.5807	100.827	90.5361	99.9943	103.57	85.7337	89.0649	90.5918	102.127	112.288	98.2064	87.8417	109.002	90.7662	104.379	80.3305	117.189	84.9517	114.818	102.265	95.1965	101.255	107.64	118.053	98.558	93.6892	92.7976
Aco027872	10.4678	11.0757	10.01	9.86178	7.53376	7.46683	10.1244	8.44187	6.47779	11.0073	8.03869	6.38869	9.95477	7.84399	4.97451	8.91308	10.8224	5.68985	10.1956	11.5415	8.51887	8.62886	9.46141	9.74385	5.92506	10.3414	8.76439	9.01779	5.90609	5.09618	7.28056	5.91938	8.35662	7.06195	7.2592	6.3205
Aco009309	36.079	37.8353	32.5872	38.165	36.4285	28.4022	31.1352	32.6274	17.5597	41.0536	32.1059	26.1144	41.5334	34.9532	22.7071	41.23	39.2911	26.5906	46.6018	34.157	42.1174	33.9962	37.3851	34.4953	21.1861	30.2774	33.9665	41.2433	28.8671	28.3019	21.284	33.6964	26.8068	36.0856	38.8004	31.8683
Aco000333	60.8517	67.5447	64.7856	54.8843	54.9343	58.7545	50.7239	53.2645	56.27	78.8021	50.5349	57.5558	73.4237	65.5311	58.8791	51.5777	57.8388	70.1126	66.692	71.0318	62.2521	82.6188	67.2671	74.0912	46.3982	81.5713	75.0419	48.1483	46.9566	42.2345	78.3021	58.1919	62.5668	71.194	66.3197	66.3984
Aco007148	71.9376	66.3842	40.2842	88.6111	70.5692	41.1969	95.1206	50.3593	30.1874	92.4889	61.2473	34.037	89.8949	57.2365	30.7366	92.2425	47.9459	35.5133	83.2322	34.5895	27.4618	87.5522	86.4384	92.8381	48.9113	48.2272	85.8945	73.4684	46.3634	38.4034	29.1298	29.4204	31.9578	39.3544	45.266	29.2698
Aco001323	49.1055	56.3553	54.7663	45.7542	57.2908	51.6831	57.9975	57.2449	50.9958	65.1054	57.0111	54.0622	75.3789	62.6092	48.9385	67.0534	57.3242	56.8558	80.2286	54.2673	56.7431	64.3698	69.5227	62.6852	44.8901	64.3457	60.4375	61.8359	68.0026	63.5816	50.5919	58.2788	55.0301	72.9685	67.4445	72.7336
Aco010551	30.0675	29.4455	36.4168	24.0216	24.1923	30.6674	26.3058	20.615	18.705	34.1386	19.434	17.0346	29.5458	26.2886	19.5471	33.2376	22.1209	24.3154	32.2735	29.3096	35.2414	32.4986	30.4164	25.6546	31.6908	24.8754	34.3952	19.8838	20.6367	23.7248	21.3765	17.8268	21.1488	26.7345	27.6319	27.6722
Aco022168	31.8553	31.2604	28.4855	31.9852	27.6894	27.4732	35.2299	28.4298	24.058	39.6478	30.8737	25.2046	44.7824	31.1259	27.4999	44.713	28.269	31.8711	43.2237	37.1312	40.1036	38.3593	42.2899	23.0311	18.5377	33.7946	43.1136	40.4766	26.006	25.9632	33.3197	39.3263	34.1792	40.5747	35.0929	40.1662
Aco011753	31.0011	33.509	41.8463	30.3306	35.385	39.0414	40.5697	42.7915	47.7757	45.0802	37.4255	42.0345	52.6865	41.463	42.0982	42.1535	37.1019	50.4025	54.2083	46.2392	43.7097	45.5403	52.061	41.766	35.3692	48.2674	45.2954	47.3553	50.0219	38.5503	45.9603	50.3908	52.0444	53.1398	52.6343	54.2033
Aco002986	25.9226	18.9273	18.3089	20.8588	18.4751	13.9633	25.809	14.0912	17.3635	25.0299	14.3353	14.9142	21.6798	12.669	16.6602	29.5885	16.9385	14.672	25.9498	13.4951	22.5343	26.6703	29.4961	19.9199	12.3765	17.2974	29.5163	23.3864	16.5693	13.0666	13.7995	16.2502	18.4074	15.4377	20.6497	16.9879
Aco006072	28.1584	26.1176	22.9283	21.7116	24.275	17.7396	25.3457	23.5033	18.1934	31.0233	18.5767	20.0222	31.4838	23.5545	17.9429	30.7802	22.4891	17.4035	24.6379	32.2917	27.5994	29.8641	24.8852	29.2845	11.2842	32.8062	25.8665	27.7961	19.5641	15.7009	26.841	24.0867	28.6941	31.6317	23.1946	26.449
Aco030240	10.8732	15.9594	18.2257	8.02142	11.2709	17.96	8.74024	18.5653	17.6792	12.1506	12.1191	12.6759	18.1356	17.2125	13.5342	11.3666	14.556	18.6007	17.9113	16.2992	15.2225	9.46363	12.5961	14.2012	10.3527	16.0932	12.5133	12.0447	17.4982	18.7447	7.22005	7.26155	6.62651	14.5682	12.5136	17.2987
Aco010006	72.3047	68.6205	58.7812	68.4674	65.4987	60.859	79.7318	65.7148	55.742	86.5243	54.461	59.2007	92.3178	63.2445	57.7998	82.8082	73.4787	57.8602	91.0998	78.751	66.0902	59.4044	76.3763	71.3458	58.6411	67.1231	75.442	84.0975	89.0024	80.1439	64.8858	71.0161	74.0098	75.6823	86.1539	81.2124
Aco012824	15.4961	14.5681	15.7299	11.1433	14.2374	16.2468	26.564	18.5271	19.7439	27.3894	15.2534	15.5425	27.1183	16.3447	16.9686	31.5008	15.9666	17.7042	31.656	17.9016	21.6341	30.587	28.2338	15.0675	17.5861	14.456	26.0959	23.9481	28.5156	21.6585	21.8476	25.4501	30.5424	22.2047	28.5393	28.582
Aco013091	84.8538	65.8401	59.0472	78.0952	56.4155	49.7062	85.8596	58.891	56.6825	93.9276	51.2632	58.9984	74.8242	54.9159	56.9348	84.4027	66.6786	58.2521	77.5017	82.7541	77.994	90.6934	101.889	75.4294	57.0188	74.9614	84.6633	76.1786	54.3453	44.8004	82.5429	70.6136	67.9499	92.3329	88.0159	76.8679
Aco000832	34.1782	28.1822	24.8061	28.4724	23.2074	18.1084	28.5388	23.0608	19.3525	34.6333	15.6053	15.6363	34.3049	19.9312	16.6844	29.783	15.8264	18.7819	30.0783	18.8901	10.8558	33.514	33.3861	31.875	17.0293	23.1478	30.2365	25.8723	16.7749	13.911	4.67354	3.6867	4.53492	23.5205	24.4192	19.864
Aco006057	68.856	72.7024	109.19	69.3601	82.4457	106.669	87.2106	103.913	121.859	79.6851	74.4423	104.352	94.3534	85.9107	90.4576	68.4257	84.1771	83.9859	123.085	120.439	121.811	132.57	106.108	73.8214	105.371	86.611	111.2	108.012	130.823	114.93	91.81	103.249	107.476	117.734	117.054	111.98
Aco001739	24.9085	24.291	30.0771	21.2631	24.9274	28.4919	32.1449	26.3184	22.6381	27.6205	21.3306	24.721	32.9618	23.6102	23.2867	31.1559	22.8368	27.6643	37.1065	21.903	26.9156	28.8508	33.0649	25.5625	19.638	29.3247	30.1899	24.3532	24.3488	23.5419	28.2181	29.2776	29.2294	29.1885	28.2684	27.4818
Aco017514	62.482	68.7167	61.2673	46.0248	56.1418	48.227	49.7524	51.3845	38.0174	74.3	47.3218	36.3524	65.0953	57.3823	37.913	37.4886	45.8364	52.6608	62.1777	63.3644	43.3486	63.3785	62.3356	73.8575	38.3904	65.7007	65.3084	47.5543	45.01	40.8718	49.2574	39.7391	43.948	67.67	60.4055	57.2436
Aco000130	11.5038	11.416	12.0477	11.4843	11.2058	13.8957	12.5904	15.3303	14.6526	19.7844	12.1081	15.0583	21.8474	14.5646	15.468	23.1762	15.2376	18.8793	23.5455	23.2057	20.9394	22.3778	21.863	13.9797	17.8763	13.8971	24.0877	15.1291	19.0803	18.7446	20.0844	20.3747	23.8116	22.3098	21.1436	24.8553
Aco011381	34.591	34.5985	44.4493	27.613	30.1433	38.5294	26.8898	31.3792	27.3137	43.3843	26.8452	25.9891	41.0333	34.6032	27.0901	28.5731	25.7817	30.0389	35.7628	35.8868	28.8011	37.8513	38.0995	40.0613	26.7285	41.9743	36.5941	28.3735	32.2453	25.3701	40.8067	33.888	36.3888	24.3893	27.1292	24.9207
Aco010332	18.5122	21.3736	25.7956	14.8581	20.713	23.3089	18.3873	19.8866	19.4814	25.7284	15.8359	18.8594	29.5195	22.7963	20.6634	19.7568	15.5594	24.2778	28.5693	23.082	22.0577	25.2297	25.152	21.4985	18.9588	22.0493	22.2412	21.6428	21.5179	22.5538	25.0617	26.7134	23.4031	20.5976	22.0807	20.0374
Aco000422	35.2651	36.3776	56.4048	31.6707	35.3118	62.3079	53.9924	47.1987	63.7769	46.1636	38.3821	56.436	65.1041	44.2006	58.4287	67.989	46.6518	53.3444	73.2376	46.572	56.3172	47.9703	67.5038	26.2088	40.9809	37.539	70.2329	59.3532	71.8657	70.2154	51.6697	56.8603	60.0934	51.4055	61.6273	57.4184
Aco000484	33.2093	34.0558	31.3561	33.6536	35.6616	33.9799	37.7366	33.4903	36.2361	37.2078	28.343	36.2292	37.8042	28.7484	33.1884	39.2035	30.2509	32.0413	47.034	24.9517	31.3306	48.8566	47.5962	27.3604	23.2542	33.6772	39.0823	36.3991	46.6832	35.7627	35.8272	36.4089	40.7561	24.8195	35.1266	30.3924
Aco017482	5.31263	6.1979	9.53702	4.5285	5.14387	8.91706	6.05317	7.50202	5.75535	8.68087	6.63355	7.9628	8.78709	6.2192	6.25387	6.61273	4.77607	6.98399	8.18669	2.82661	4.62592	7.59767	9.19643	7.14332	3.28363	5.65808	7.03115	7.17051	5.95087	7.99121	6.5123	7.74415	8.65155	3.41347	6.01472	4.08937
Aco015247	11.4584	12.1581	13.4455	9.50273	9.88313	14.2234	13.304	15.4935	17.2821	13.8775	11.9224	16.7871	19.7224	15.5741	15.6576	15.3104	13.2935	17.5126	21.9067	17.35	13.7113	21.4151	17.725	14.5719	14.0733	16.3202	17.7186	17.0026	21.2696	16.1624	17.8189	17.1831	17.063	18.2095	18.6999	18.9246
Aco003347	7.57073	8.20907	8.1447	7.083	7.64158	9.15403	9.8227	8.97958	7.05334	10.029	7.28133	7.10138	10.8323	8.22621	8.36117	10.8524	8.58787	8.91268	12.3802	9.39062	7.55955	9.65404	11.8817	7.56975	6.34494	10.1571	10.1462	9.3688	11.5194	9.9123	7.1283	9.38018	9.87872	9.42268	11.7639	8.83176
Aco028573	31.23	35.598	37.5864	23.1092	29.4693	31.8721	31.4438	26.8802	26.8646	34.5743	27.7825	30.238	36.4027	29.5948	26.302	29.5488	26.784	29.2496	34.9855	29.327	30.0883	36.4101	28.641	37.4719	16.2787	39.9263	31.6828	37.4988	25.9801	24.2592	25.5065	27.4687	23.6622	31.5023	30.5585	27.0772
Aco021289	85.0521	78.6373	92.1713	80.5741	79.6494	83.3117	103.117	77.705	71.21	93.0401	75.4268	83.4726	101.625	77.1893	77.9596	92.1462	74.7491	87.0154	114.646	69.6599	86.4835	109.811	117.66	88.1898	73.431	82.0663	107.682	115.822	117.023	92.5952	69.9625	68.8995	69.2323	91.8434	86.5452	88.4263
Aco003648	4.65559	3.46877	5.18342	5.04743	5.14876	4.57963	5.27406	4.85388	4.25959	5.00566	3.46806	4.97983	5.1414	5.0483	5.39998	3.98063	5.02058	5.12958	5.85144	5.01745	4.67708	3.1291	5.81289	2.24943	5.73183	2.89563	5.17751	5.67728	4.7362	6.33728	3.95382	4.02082	3.47107	3.91853	5.75158	5.09492
Aco020456	14.4259	15.3528	16.2498	12.6064	14.9697	13.8284	14.3594	12.4175	12.1928	18.7243	11.433	13.9105	16.5218	14.808	14.2824	13.5583	12.5381	17.6354	16.5219	17.4911	16.613	17.7005	16.5678	15.9826	12.5588	19.3342	16.6303	14.968	18.279	13.1021	17.7419	18.9647	17.3677	17.2794	16.7705	16.8782
Aco011103	37.3472	32.8295	26.0902	30.6374	28.6434	28.4496	40.4641	31.5025	38.5592	46.0368	26.3534	36.4858	41.8191	29.5184	40.522	35.7205	31.9449	47.3394	48.6641	49.0571	44.5603	49.2992	46.5818	31.7086	26.2541	40.9147	46.6565	35.6096	37.2683	31.7622	30.5862	33.7611	33.7954	41.5496	41.4246	36.5535
Aco004802	22.1079	25.6798	22.1344	21.9302	24.2928	20.5309	27.2584	27.1617	18.085	32.9419	25.8762	16.7122	34.8435	32.1534	18.8424	31.0797	30.8491	25.6733	36.3047	34.8629	29.4287	30.8372	32.3474	32.9079	20.7374	29.0786	27.5327	32.3256	30.7562	29.6472	26.7832	25.5393	29.2013	32.1226	36.8567	33.7607
Aco020593	50.0921	48.8172	46.258	40.2839	44.1117	40.8235	46.6172	42.2368	43.0824	57.6959	38.367	35.7867	47.0252	41.7908	33.5772	33.0727	38.326	39.4105	49.412	46.049	38.5111	50.5305	50.2697	50.4361	30.4395	50.3327	52.8923	45.0204	53.6005	49.0992	29.5796	26.6357	28.2546	43.6873	44.4596	46.3785
Aco025610	18.3855	15.7803	20.5345	14.2698	15.4751	22.8645	21.653	20.1356	20.319	22.8941	19.8808	12.8338	26.9773	17.1622	15.5652	27.3149	21.6214	16.4905	25.1355	28.4007	22.0729	29.9937	29.9859	19.5715	14.6962	18.6365	27.3886	22.7164	21.0492	21.8652	21.637	19.0003	22.275	18.8873	22.8657	23.5283
Aco000807	5.24843	6.26738	7.14822	5.09283	5.51063	5.65736	6.90981	4.89808	5.07465	7.03906	5.62349	5.15815	7.32089	6.32634	6.00785	7.21003	5.28379	6.86814	8.86909	5.05047	7.92218	7.25654	8.91008	5.99326	3.4795	8.25827	7.87971	7.18984	7.97083	5.57578	7.79271	7.43081	8.27976	5.97851	7.3505	7.13101
Aco004566	25.9833	28.4797	30.8887	21.4964	25.0108	32.7793	27.5593	26.201	25.0669	35.4452	25.3357	23.8584	33.4529	26.6602	24.2948	28.5232	30.3811	27.0635	30.5373	26.4509	29.8177	32.4324	30.0561	31.0171	23.9898	31.5017	26.7139	31.6684	27.983	32.6768	28.4794	33.3294	30.1607	27.187	28.8204	28.913
Aco000571	273.04	218.274	207.803	269.095	184.746	197.027	300.247	152.819	220.534	250.162	161.149	250.688	241.37	155.955	265.21	300.736	164.882	242.887	213.53	154.968	265.759	215.647	299.824	210.627	104.23	270.449	324.191	289.878	149.61	107.736	133.434	120.202	117.147	249.047	190.588	239.06
Aco012449	42.1606	42.5667	41.1906	33.2648	38.1055	39.8042	36.5575	32.6211	25.2383	44.7322	33.9591	22.4341	45.3153	38.1827	25.8138	30.2237	29.5814	29.4829	45.711	35.1499	27.8615	42.6632	37.7632	44.6962	35.5132	34.4294	41.0779	29.6651	23.7465	28.0137	36.4906	24.3586	30.2392	30.9042	27.9849	26.1019
Aco010484	62.6199	46.5803	51.7482	36.352	48.6884	32.6668	79.5606	51.162	64.7037	39.5562	12.4933	66.9034	62.108	21.6655	50.704	77.9872	44.0668	36.9821	62.7683	46.8099	77.84	42.5619	77.0013	43.8778	48.2347	36.9061	76.7946	60.5168	74.6581	56.2486	43.0961	53.3765	57.057	73.2005	64.0856	65.6979
Aco025138	11.3074	12.9958	10.3445	11.9633	12.8719	14.91	15.9239	11.2676	9.92574	16.3046	9.07521	9.89427	17.0514	12.838	11.1116	15.6579	13.086	11.9243	17.933	18.5392	15.3954	16.4713	13.1023	11.2694	11.8894	11.6697	16.9925	19.1526	13.8874	12.3674	12.0683	7.68324	9.1584	16.8007	15.9307	17.7035
Aco001428	28.6085	29.0233	23.2714	26.5747	30.0028	18.5489	23.7658	25.7135	15.3072	24.0651	20.7319	14.2149	28.1929	32.2735	16.0839	22.2019	28.8775	23.4683	29.9712	33.5116	26.6197	29.4601	23.6835	28.9298	20.4384	34.3064	23.7641	20.4372	15.9431	18.5992	28.9874	21.1936	27.0237	32.0608	29.1534	31.4235
Aco002741	6.15471	7.37266	7.13735	5.355	5.66442	8.76089	7.01902	6.04226	7.11481	8.11998	5.57316	8.43901	6.71677	6.0646	8.42143	8.31908	6.54118	7.48356	9.22787	6.22316	6.9643	8.70913	5.67606	6.99072	3.17358	9.43256	7.33515	5.40942	7.44328	6.70646	5.598	7.52614	7.94903	4.72638	6.059	4.95365
Aco020893	23.0848	17.1871	17.4032	22.1254	16.7434	17.5602	25.6765	16.5702	18.3894	27.9667	16.4518	17.8329	27.5754	16.9457	18.7168	24.0867	16.4068	23.7566	26.3374	21.9116	26.4427	31.1866	30.558	17.903	14.6935	20.4019	30.5722	24.6044	25.0252	19.2831	19.2078	18.0368	18.5137	27.0153	29.9583	31.3595
Aco009159	11.5751	12.9811	14.7401	10.9924	12.0267	14.1652	11.9834	12.5263	11.5425	15.1943	10.915	11.4948	13.8711	14.5999	11.1984	11.0732	10.8892	11.9917	15.7875	11.7281	10.6135	12.5869	14.0681	11.5871	8.19004	15.778	13.2334	13.3441	12.1869	13.4182	10.387	11.462	11.7452	13.5765	14.9746	12.0627
Aco009403	10.7452	13.4771	15.3207	9.90282	11.7018	13.9121	13.3341	10.349	8.5872	14.8114	13.6303	12.0255	18.8639	13.827	9.65622	18.0541	13.6315	11.181	18.3512	11.0193	12.6061	18.229	14.6504	15.0858	8.0389	14.1673	16.1232	12.7783	11.741	11.9903	11.1986	12.9522	9.7894	12.1127	13.1066	13.3779
Aco024486	16.0361	15.2603	21.9378	16.2669	18.5683	23.1519	23.0954	18.4499	22.4856	19.7843	16.2372	20.2445	28.4347	19.0558	22.2474	31.425	18.4445	24.2422	28.7181	14.7742	16.7599	27.1935	27.3098	15.0511	18.6212	24.2131	27.3183	30.0015	27.1804	22.1683	26.6637	32.0735	30.6871	20.0172	21.3744	17.8398
Aco004400	17.9831	16.8474	20.3878	12.8079	14.7431	17.2183	18.243	14.1878	14.4976	17.7555	11.2391	13.2414	19.8802	14.8557	12.8811	13.9201	11.4464	14.733	21.8353	18.3894	11.6839	22.8446	20.41	14.675	13.0382	17.0551	19.674	15.9361	18.1876	17.8531	16.8876	14.6969	14.6586	18.672	20.3182	18.2901
Aco016104	35.2058	47.6778	35.3713	37.6101	45.8161	36.4455	32.6393	37.5906	26.8216	43.1657	42.8518	27.5952	41.9575	46.7395	24.1409	35.2044	42.3689	29.5103	45.4185	32.2963	30.5921	32.6845	27.14	42.9842	24.6694	38.8496	31.8309	39.7703	44.7409	41.0238	31.2782	26.7918	29.7009	36.6348	45.6929	47.6855
Aco024714	48.1271	44.3561	46.3939	50.1477	47.3599	48.6683	81.0835	43.0404	42.9018	54.0185	40.6553	47.4577	79.4197	39.8196	43.9924	54.0454	43.0856	63.5483	86.867	49.3186	47.3814	80.8326	82.9537	52.727	45.814	57.3581	73.9554	69.3543	50.0433	52.2131	63.8654	69.1101	82.3503	85.917	70.2019	72.9827
Aco007872	159.074	136.041	130.265	154.439	112.439	111.172	224.639	109.167	90.8885	163.901	122.064	94.7349	183.057	118.522	100.984	225.552	122.829	109.394	215.526	111.627	117.963	221.228	225.979	154.952	77.2923	133.12	233.887	186.506	153.973	111.002	138.829	154.051	177.567	168.933	173.35	158.348
Aco021371	15	19.0296	17.6509	16.1849	18.6768	15.2574	20.3399	18.3671	19.7381	23.0016	18.7705	18.1303	26.2399	21.9426	20.3134	25.1733	19.2818	24.4332	24.8708	15.0427	24.2931	22.5983	25.2284	15.1651	15.9881	22.9733	27.606	26.586	24.664	20.7225	17.9749	19.3365	20.8911	23.4886	21.8684	22.1865
Aco017981	7.74639	8.59723	11.347	8.49919	9.76131	9.03074	9.12304	9.96807	8.0223	12.5415	9.11643	8.14485	10.2102	9.74457	7.14462	10.1598	10.7862	9.72723	12.7924	3.53751	11.914	10.9412	7.31761	8.18368	5.67924	12.2766	8.14357	12.4525	10.6575	9.38598	6.73614	8.28069	8.6409	8.52265	9.75244	8.32419
Aco004900	14.6031	15.8442	13.7371	13.9248	14.5668	19.2831	17.0556	14.4182	27.7061	16.878	15.1043	27.1787	15.4269	11.7931	22.3983	17.7508	16.3411	18.2308	18.7006	18.9529	12.3415	27.7311	27.568	21.9198	24.4477	26.21	23.2437	20.9848	19.2245	17.8017	27.2213	25.3415	26.0827	27.7814	26.4832	25.3316
Aco020979	14.508	19.272	10.5891	14.8446	18.6852	11.1755	15.7114	14.5015	10.7041	18.2653	16.2743	11.9453	17.3829	15.2801	11.4948	11.54	12.7701	12.0647	15.1142	15.2708	13.1531	16.8694	16.4579	18.0278	10.4527	15.3682	13.0806	14.4126	10.7218	13.2278	12.3782	10.4965	12.5238	17.4259	13.7643	13.5679
Aco016095	79.2737	78.5596	80.9748	68.9026	77.4504	98.0007	110.242	100.554	108.981	93.5233	93.6154	118.872	102.625	89.8949	97.2048	116.352	96.8177	98.8774	105.031	90.7524	90.6975	99.5719	121.831	88.5514	105.666	89.379	108.131	117.745	116.135	116.27	82.848	69.0575	82.4924	110.656	102.264	102.023
Aco016987	40.0932	44.9647	54.5645	33.4352	44.4249	53.9333	40.1888	43.5663	49.1032	47.0939	34.1303	42.8298	55.5137	42.9679	48.0824	35.9117	31.9096	55.9987	53.7816	43.4419	38.3996	60.9334	49.8069	44.4806	34.5808	56.5308	53.6863	41.8184	43.8142	37.1402	33.6525	40.852	36.8278	46.52	52.0445	42.5373
Aco017592	86.2007	88.2621	96.8605	61.3794	78.5391	79.2883	61.6954	94.3056	75.1216	85.5313	84.1061	74.8598	75.5106	92.5434	82.9521	52.3712	91.1192	82.3921	69.0176	95.8853	85.5013	68.5681	75.9309	100.522	75.5843	91.0689	67.8626	59.5515	53.1195	55.3032	82.1866	88.2305	84.4131	70.5538	70.72	69.8926
Aco026735	15.0013	15.6561	12.9073	12.3572	17.4496	12.2304	19.2565	25.5682	15.5713	17.5382	24.5058	12.9	14.6629	23.0958	15.0571	17.2683	20.3773	17.0885	23.6937	17.5411	15.1484	21.348	21.6166	21.9831	22.7706	18.4289	19.3419	20.0263	23.9318	18.8057	10.9457	15.381	16.9578	20.4776	18.8897	14.1285
Aco015048	75.7111	64.908	57.872	67.2571	55.8076	54.067	76.2422	59.5778	55.0234	77.5806	47.566	48.1644	69.1303	51.684	48.7037	71.4827	53.1357	50.5564	84.3008	64.947	60.2268	67.5381	92.0988	60.0999	64.9244	65.3313	83.9645	71.1329	85.5486	68.3756	64.7391	57.426	57.21	79.4929	66.3666	69.6714
Aco017047	46.8184	43.4223	45.8513	39.4888	39.4389	44.056	41.5961	36.9367	41.4047	57.6527	31.5074	40.484	52.4114	41.3499	40.3877	37.3591	31.4976	43.1152	45.7512	44.6492	36.7225	56.4007	43.1612	51.8574	34.5791	53.3246	41.6755	47.5307	54.4394	51.8961	33.7848	26.574	28.8583	39.3764	43.2398	43.1422
Aco021166	29.8486	27.1282	27.8629	23.6414	23.7212	26.6519	22.6991	26.1718	23.0324	29.0767	16.6907	21.1065	31.9324	21.9513	20.3122	22.9461	18.6027	24.4215	34.1	31.4073	25.2872	27.6484	32.1467	29.2398	22.6903	27.6713	30.975	28.4	21.1772	18.9985	24.5002	25.3726	27.2616	26.3181	25.9879	25.8107
Aco012215	84.8745	88.0873	115.518	86.8057	96.9875	120.912	141.426	139.083	172.868	126.665	105.624	143.119	177.156	124.216	155.241	161.785	124.042	147.312	183.528	138.743	131.203	165.131	182.051	96.8774	131.458	100.99	170.993	159.491	177.914	171.76	103.837	91.0596	89.3711	133.324	140.757	149.502
Aco030299	266.212	188.882	226.256	222.649	200.349	169.65	220.776	169.984	246.698	199.53	132.615	222.096	207.29	128.45	230.891	261.393	155.841	189.967	269.204	253.368	231.505	292.607	267.636	175.878	158.243	264.209	259.01	214.914	213.611	158.676	131.611	131.189	131.453	227.887	225.012	200.11
Aco028435	38.2317	42.0073	41.2398	42.6676	36.3197	48.3937	42.0313	24.9589	33.1023	41.8514	30.1713	43.5869	32.4826	28.3674	38.1474	45.4255	33.7008	31.9657	47.241	8.34303	35.6134	37.3682	41.5501	26.2509	21.0592	34.4997	40.4068	38.2488	36.0492	26.8032	28.0927	50.2647	48.4725	30.0025	31.4487	31.0596
Aco014973	24.9252	23.9177	21.9561	26.5652	23.2223	20.5577	24.9042	18.2405	18.5786	27.9487	26.3351	21.6259	24.0578	21.4754	17.0516	22.894	16.9888	16.0628	20.8263	9.27457	13.8636	28.5688	26.3066	24.7813	26.0817	19.4065	22.5324	27.7698	21.6243	23.3625	13.5223	15.0994	16.3719	14.0299	17.6464	17.7834
Aco006983	110.66	134.758	95.0089	113.967	110.119	78.1863	144.008	84.2751	67.2971	126.63	135.744	75.599	115.606	124.016	81.6722	133.618	106.007	116.877	137.277	121.139	101.728	122.774	136.165	133.68	60.5817	115.984	127.466	110.284	97.6503	79.3375	93.4924	76.4027	84.221	117.44	118.493	125.693
Aco022167	7.06076	9.35506	11.8668	6.41297	6.9474	9.77969	11.1052	9.48646	10.751	11.4028	6.80067	10.9819	13.5053	8.4298	9.49872	13.6257	7.99961	12.5103	11.828	5.11297	11.2793	13.193	12.5486	4.7881	7.05091	10.5966	13.4922	14.4459	14.9851	12.4813	12.0103	13.8329	14.8659	9.69985	11.7824	11.4259
Aco002065	4.49912	5.86479	8.04368	4.84043	6.39449	7.18013	8.48953	7.07383	7.71653	8.34722	4.90632	8.87755	11.0043	6.28205	8.87775	10.0175	5.50498	10.7895	10.7133	5.98314	8.48341	11.0254	11.2604	5.97799	8.01601	6.53813	9.36994	8.69202	10.4274	7.75012	9.02256	10.3014	7.94456	6.92879	6.8188	7.73452
Aco014641	81.8127	82.3192	74.6019	90.1349	69.8565	64.1365	95.1406	78.3444	64.6026	103.385	78.2043	75.4961	107.981	82.9065	67.3003	80.3064	83.6525	101.902	116.595	94.8187	85.5601	101.77	121.682	82.95	65.9346	90.076	107.016	113.268	94.6848	76.1954	66.5789	62.0921	62.7579	104.196	89.9149	87.9764
Aco015248	67.1221	55.3163	48.9124	56.1988	45.7717	48.1229	60.5293	39.9625	43.946	71.2686	39.7874	40.3583	65.3546	40.6642	36.9875	41.7523	49.5252	40.811	43.2826	45.3168	41.9015	34.8757	63.6975	68.1714	46.1659	65.4667	66.9998	48.9349	45.6891	40.694	62.6689	50.5004	69.7712	63.4579	50.8524	47.9017
Aco024142	14.4092	15.4989	12.6799	14.6075	13.2834	13.212	16.9374	12.3504	19.731	18.4302	12.3893	13.752	18.7841	15.274	13.4666	18.5083	12.939	14.6996	22.7123	14.7518	14.6383	22.1685	20.6294	16.3023	11.7825	14.9048	20.0037	13.5328	14.5799	12.0357	13.0772	13.4969	16.228	14.9818	20.8108	14.7606
Aco007749	50.0616	52.4061	44.484	45.9663	45.4932	40.7568	47.2845	37.4266	29.4059	65.854	40.4046	32.6209	60.8801	49.4585	31.8974	47.2213	40.9919	41.8662	66.8986	55.0628	43.8116	66.5026	58.5916	62.925	33.5442	58.0257	56.2251	46.2729	30.252	38.5462	45.4298	38.4114	41.4157	55.0331	48.7313	46.127
Aco018482	27.217	29.8596	27.7428	24.8852	27.3992	27.0991	33.9953	34.1035	27.6371	39.8231	30.4428	21.5193	35.1485	32.2924	23.9121	27.2152	32.4089	30.0705	40.4918	36.2574	30.9146	41.6312	38.9121	32.3327	35.3956	33.0801	44.4836	37.5825	44.1469	37.348	26.2436	23.8712	24.0399	42.0663	36.0168	37.3321
Aco026331	19.4062	22.9042	32.2622	12.9226	18.6524	30.377	22.5586	25.0009	30.4286	23.5343	17.572	28.2828	28.3794	18.3232	28.6021	17.6368	14.8511	31.1541	28.5168	22.8466	17.8955	36.1626	24.4712	22.5433	15.1298	33.8197	29.1014	23.4541	21.8789	20.0472	17.4118	27.171	23.9648	33.9973	29.8373	23.5732
Aco024054	24.2622	28.9609	31.744	21.4793	24.5179	27.7089	21.8088	20.5758	22.0429	26.6598	19.8495	21.6959	26.2786	23.3451	22.4447	20.1942	19.2817	26.2137	28.3881	25.4081	25.7077	32.722	23.2821	23.1154	17.0847	31.3472	22.0126	23.2278	27.0961	21.0402	19.7315	22.1048	19.2573	28.87	25.9373	28.9707
Aco021515	36.6629	44.6725	48.5116	39.1468	41.635	49.5778	47.3117	40.2889	48.539	50.2962	43.1988	46.0438	52.4093	38.9539	44.1244	38.5843	34.9962	46.6513	47.014	45.7296	41.9264	45.9197	48.086	41.2793	40.6115	52.6983	53.1966	43.8995	56.0967	56.6919	39.9239	29.5087	33.4409	40.5583	42.5069	41.056
Aco007554	228.823	190.485	207.288	207.739	175.577	163.277	240.692	157.179	211.497	222.833	143.314	182.674	226.759	129.114	202.936	282.816	160.194	174.845	289.158	234.633	228.706	271.565	261.739	188.687	164.061	235.673	263.044	205.782	186.058	144.2	137.649	134.831	135.052	253.878	232.528	209.722
Aco010854	72.9965	71.7511	76.6815	74.8094	75.4559	76.5843	82.4226	79.9671	92.4092	86.8998	75.0829	87.819	81.5065	72.9628	78.3836	77.2642	67.6495	64.2362	86.3725	49.6577	51.6033	91.3124	93.7228	75.3423	87.0244	72.9143	93.8231	77.4739	84.2451	74.5649	36.3455	39.8108	43.1325	61.969	72.4457	60.809
Aco008740	28.8189	34.2454	34.2546	26.724	28.4175	33.3439	29.7081	31.5346	35.1552	39.1905	28.0394	32.4595	47.1038	33.2432	31.4405	37.3646	31.3963	36.7469	49.284	45.4983	39.4055	49.5055	44.4142	36.604	28.4528	45.1322	43.2321	36.1099	34.2212	29.2878	39.8315	37.0881	40.6363	41.0971	40.8895	38.1146
Aco000330	22.3045	15.4719	13.3835	25.4309	14.5557	13.0785	19.5278	16.3694	29.3024	18.1474	13.9892	29.2614	18.3467	11.6276	24.5683	19.473	15.4759	24.2068	26.5005	17.7007	25.2845	20.3487	18.0082	15.2728	18.3635	20.0987	23.0249	22.7983	22.1528	17.9612	26.2298	23.6201	24.8146	17.9887	20.3209	24.2173
Aco027023	16.3099	11.6227	22.9603	11.09	16.8489	16.0138	19.7115	15.3981	24.88	21.9231	10.669	22.0275	16.7393	8.77182	17.8328	18.187	13.2666	18.1625	19.6601	11.8561	19.9753	23.6165	23.8817	15.6061	6.42787	19.3693	25.0186	23.0793	18.2826	17.0241	9.22338	15.7352	16.693	15.2062	22.2039	17.8684
Aco015308	29.6434	32.5925	40.971	24.804	29.6893	35.6255	29.9337	36.0485	37.905	42.1945	24.9413	33.085	43.2398	32.811	33.9382	25.9714	27.279	36.8418	44.065	47.9747	31.7756	39.6005	42.362	39.9273	27.9833	36.5514	43.8604	29.8779	35.9375	33.882	26.2758	27.7299	34.2493	47.4303	42.4444	35.2059
Aco016803	8.62214	7.84319	11.2775	7.52922	6.92542	10.3285	9.29016	6.3417	8.12153	7.17555	4.55039	8.50546	10.0709	6.42203	8.47597	10.5935	6.25088	11.7368	10.0899	7.26543	12.7119	11.8534	10.8194	9.29009	5.70202	12.9152	7.7856	9.84322	9.23556	6.80489	12.5348	11.4818	10.9887	7.31639	8.51647	7.41273
Aco003990	25.7197	31.54	27.0629	23.5759	28.3336	24.9525	23.0882	25.8205	23.57	33.3152	28.6643	19.5963	33.3794	32.0653	22.9974	23.7085	28.2541	32.6551	35.9306	37.4698	36.1257	28.5579	27.0518	25.8748	17.9316	32.5043	28.0384	26.2523	28.0732	29.1371	27.8294	25.9438	25.8515	30.7985	29.8364	33.3444
Aco017742	59.3347	53.0347	39.3095	53.7098	46.5654	31.5768	55.8421	37.3002	29.3797	57.1926	28.9766	25.2881	51.3355	31.5696	26.0821	39.0046	30.0523	26.9749	53.6175	37.766	23.648	46.6414	45.3692	44.6904	33.799	40.1261	50.562	50.8203	40.4172	35.2196	23.5859	25.4169	28.0705	39.3496	45.9255	41.6504
Aco009406	137.148	110.632	112.788	118.642	104.725	95.6652	127.286	96.2837	101.832	122.316	72.7593	91.6742	122.655	88.8552	101.769	147.122	101.608	91.9339	141.371	122.646	135.861	133.793	125.208	119.725	76.526	103.566	138.951	115.495	108.325	77.1006	139.519	117.952	129.068	112.537	119.372	118.734
Aco011664	17.4839	20.6064	13.7477	17.2652	15.9889	14.4653	18.7194	18.2795	9.48665	22.7749	20.2263	10.8309	18.7983	23.646	11.5235	18.0597	17.9652	9.7452	20.207	16.6634	12.4472	18.2995	17.9832	21.0937	12.4629	18.5419	17.0982	15.9662	21.1483	16.3982	13.5507	12.8121	14.7505	17.3223	18.8638	17.9727
Aco006446	62.3093	61.4828	76.1624	58.38	62.1451	71.7235	50.8724	67.847	71.2652	58.5528	62.8849	75.628	63.7986	69.0133	69.5947	61.0932	59.5775	70.596	80.3205	39.5652	73.844	56.1262	61.3805	56.2353	48.9976	70.6374	55.412	81.7434	84.1828	72.8506	70.0408	82.6465	81.257	71.7724	87.7568	84.5861
Aco012376	273.938	302.23	221.361	255.653	253.207	165.322	294.361	186.016	127.958	253.36	140.874	126.468	263.909	164.325	119.41	272.099	172.74	108.959	263.362	149.437	164.645	259.618	276.674	277.902	150.037	171.633	262.796	234.691	173.138	158.807	124.323	110.444	121.155	197.216	181.598	167.328
Aco007160	365.969	287.004	323.542	383.787	276.109	335.706	434.346	232.519	338.837	335.71	229.2	346.695	328.073	204.376	347.411	472.41	256.507	342.356	455.847	276.886	454.381	366.872	451.172	255.482	179.977	332.964	456.226	352.105	309.96	233.413	213.834	300.129	309.739	412.97	390.881	401.242
Aco010178	35.2166	30.9925	42.0725	30.4485	29.854	39.923	46.5987	31.0056	42.4067	38.1883	31.285	45.8725	49.1588	33.3489	46.4886	45.4789	30.6886	54.2802	49.7049	51.649	52.9691	54.9602	56.3959	29.8607	23.9105	50.9083	54.3137	56.1268	44.1671	28.8739	40.5185	52.1408	53.6023	52.7417	46.5066	53.2291
Aco008202	149.165	122.627	121.76	138.346	103.215	108.357	145.499	105.389	112.841	171.048	80.0723	96.3808	141.909	81.4778	94.3817	133.526	77.7475	88.5533	147.346	109.261	92.901	144.013	156.133	152.407	89.3194	124.14	163.193	126.367	125.694	99.8237	73.8757	77.4626	85.4241	176.982	175.737	158.002
Aco013953	310.69	262.429	232.444	365.422	228.103	216.499	408.787	195.201	194.742	365.552	270.959	216.823	328.99	227.778	201.487	426.613	240.704	271.774	378.024	159.006	231.379	420.596	388.806	242.821	130.328	305.273	426.335	377.113	275.697	155.472	256.664	244.527	212.213	242.158	276.792	248.83
Aco009938	21.2568	22.5969	21.5121	23.0243	19.8799	19.0121	24.967	14.915	17.146	24.3469	16.3565	16.0678	27.1818	22.415	18.7986	23.6066	18.7282	22.8351	26.5068	28.1212	26.3065	29.8405	24.8719	19.7953	13.9348	22.3585	22.0223	20.3832	18.2078	17.8808	18.9022	16.2525	16.9724	28.4819	27.2408	29.8892
Aco006623	36.059	42.5079	42.3177	27.8373	36.3747	44.8581	28.484	30.7071	32.1481	27.3896	31.9894	29.0788	30.4764	35.3868	29.2264	25.3752	34.4565	28.368	34.924	38.2124	41.0801	40.7616	29.3403	31.71	30.9185	30.3229	26.5353	31.6207	30.126	39.4395	32.3161	40.0456	41.4246	39.8633	39.8655	41.0159
Aco020850	7.72064	11.4468	10.3865	7.89788	9.46757	9.50263	9.37464	8.66141	7.02807	10.0339	8.6089	6.26305	9.28091	10.2117	5.37637	9.94367	9.54025	6.937	11.2498	9.98714	9.82358	7.81154	10.7311	8.63239	6.7538	6.62682	9.49836	7.86757	8.57183	9.78265	3.16084	5.44247	5.50409	9.59426	10.5305	9.01224
Aco000696	46.7895	41.748	42.8619	44.2394	50.3894	44.7885	50.7162	41.7165	34.474	54.0053	32.3132	38.9042	53.8166	46.5387	41.4434	35.132	38.944	48.7702	41.969	41.2968	35.8403	35.8454	42.7424	48.6602	47.4664	46.4295	49.7342	40.816	26.5732	52.6333	20.4686	18.9551	19.3674	24.2814	26.853	24.0528
Aco010250	68.3407	55.2463	77.7247	74.7646	58.9775	68.497	83.5531	52.2797	73.5047	86.9244	51.4299	75.609	78.7896	47.2977	71.9268	101.465	61.8942	74.8695	99.2921	58.7978	75.0241	80.3758	82.958	82.7334	57.7543	92.556	87.571	63.4275	57.2673	53.3798	60.7908	63.6586	77.3302	75.2484	81.6408	70.2467
Aco019356	32.5221	34.9023	31.1549	26.5753	30.1141	30.2896	38.2606	33.5398	23.9359	34.5814	33.0981	25.1776	43.9454	33.1767	22.5469	37.7299	33.5408	26.7674	47.2721	43.3881	32.2277	45.6903	40.7599	38.2397	27.3818	39.3438	36.3776	35.3034	36.3141	28.8497	41.9629	41.7991	39.786	34.5235	33.8739	31.5165
Aco000469	11.8997	12.6286	8.97969	10.8746	13.625	9.38701	13.3229	12.1597	12.1723	16.0854	9.42161	14.0443	16.6318	11.3738	11.0316	10.3034	10.5141	11.0885	9.38351	14.8599	13.9526	13.8869	8.56272	16.5595	9.12816	15.9486	12.0539	14.1259	11.1058	8.31304	10.3035	13.8331	12.5349	14.1165	12.9752	10.3124
Aco020122	153.786	149.871	147.56	128.08	123.876	141.448	124.738	122.43	152.517	122.805	117.168	156.752	135.96	122.351	138.228	118.386	127.166	156.122	141.741	161.892	145.491	173.994	139.426	159.256	130.703	180.367	121.98	164.834	174.243	162.159	128.666	111.529	111.429	187.746	178.12	181.427
Aco000662	324.602	289.639	246.379	342.899	230.365	195.172	335.121	181.417	157.421	329.86	186.804	174.554	279.678	170.698	154.984	297.75	184.601	127.871	241.379	110.011	141.438	253.125	295.612	311.215	151.756	231.223	340.999	264.313	178.089	134.268	217.931	224.042	243.513	218.433	229.034	215.176
Aco014396	178.451	169.508	199.583	176.724	168.717	227.459	170.912	158.764	241.156	146.827	123.74	207.6	177.049	132.842	218.135	225.748	138.597	197.324	171.415	153.402	208.882	113.854	183.296	137.103	183.409	192.931	174.133	220.611	241.622	210.364	211.81	182.977	200.85	203.748	231.986	197.499
Aco028583	192.405	164.032	238.732	157.879	167.501	208.207	207.195	203.07	296.077	240.667	183.223	298.772	254.014	192.223	288.099	191.968	202.91	296.95	233.986	194.188	184.506	271.294	233.028	251.842	274.383	315.651	226.377	265.62	278.596	266.851	247.562	263.574	308.375	282.843	285.422	241.225
Aco000282	35.6991	33.9363	35.1844	33.9218	31.5072	39.3933	40.353	35.93	41.099	32.8652	29.5256	44.5978	42.3276	37.3302	44.6139	45.7777	40.9217	38.0462	51.8115	47.5754	39.1326	45.0561	48.4298	34.1427	32.1859	46.941	47.0215	51.0374	36.9715	33.4803	28.9418	24.0944	31.177	48.6434	45.7211	47.385
Aco010205	38.5288	40.5407	47.2568	31.9503	43.207	52.4651	37.2069	49.2871	50.211	41.005	55.1427	50.5128	46.1502	58.1489	49.4692	40.8956	49.251	60.3879	50.8119	39.9999	50.7264	53.1759	39.9972	45.5847	43.6216	54.2193	33.9825	46.6495	51.441	50.0491	37.2185	37.032	38.4987	45.6052	43.5554	43.5864
Aco011596	45.6799	42.6794	47.5027	35.979	49.6428	43.2907	44.2555	30.1907	27.389	38.6452	28.4094	30.2554	46.2897	29.6915	29.7499	36.3675	28.1803	28.4746	41.8525	47.5023	31.4385	44.3877	35.966	34.2715	43.8146	33.4942	44.2802	35.3399	36.4897	42.59	32.6955	18.7139	22.8057	25.1967	26.4671	24.9552
Aco015857	30.9439	25.755	34.488	26.8154	27.2357	29.9653	44.6458	29.8184	44.9235	38.5866	26.2702	42.6715	49.858	26.6641	37.5524	53.1928	25.7458	30.5178	55.6275	19.1223	26.0902	54.7344	51.386	37.2069	33.7928	44.7563	44.1262	42.6171	43.7596	45.7524	35.0686	25.1568	33.7094	53.1684	48.1283	44.2013
Aco004808	43.6862	42.2355	38.8674	39.3368	34.3558	35.183	32.2744	29.6691	32.2636	42.9759	29.0589	23.421	38.6347	24.3548	23.015	32.2894	22.1812	24.4993	33.4037	23.2351	20.0136	42.5155	32.462	33.3016	28.4613	33.0706	35.1406	32.1673	28.6361	23.537	21.8403	16.0546	18.5094	35.2862	38.5375	31.5223
Aco029803	10.8971	9.57114	12.9603	9.79614	5.81768	8.75655	11.0164	7.39069	9.38397	9.8694	7.1862	11.3535	9.33393	7.88606	8.3347	6.59032	5.29349	10.8989	12.56	8.8333	8.04874	14.0716	11.6898	7.71144	10.7954	12.6608	10.7501	12.8416	13.9435	13.2818	8.53194	7.8279	7.51653	10.0691	10.9408	9.45013
Aco018666	22.3579	24.8635	27.3968	19.3516	26.3223	25.9672	16.7033	21.8432	21.9268	24.5832	20.1927	21.3517	23.7682	18.0349	22.8112	17.112	17.1607	21.6127	23.6558	19.4108	17.1733	28.0207	18.4798	26.1963	20.8508	27.6703	20.3252	20.4696	23.9707	22.612	18.5647	20.3395	21.9478	27.1004	28.1896	22.6141
Aco002381	99.4641	91.227	91.8711	84.5427	74.2565	75.4631	93.0001	78.8301	82.9795	116.355	65.8408	83.2849	103.715	69.4441	77.1511	73.1289	62.2855	83.7973	106.289	65.0722	60.6153	99.3907	109.859	98.6269	63.3003	108.195	109.721	113.498	112.3	80.5203	59.4546	56.3111	63.0645	107.028	101.871	102.89
Aco011540	47.8397	49.1465	55.2742	43.1412	42.0205	45.3953	42.5292	39.4006	36.0643	58.5756	38.3182	37.7952	47.78	40.6822	34.2249	30.5065	32.951	40.6511	47.7961	38.6433	39.5456	50.6784	47.7878	50.5327	30.185	59.5119	52.9386	48.3734	37.4469	32.264	29.3709	28.5243	31.669	50.5327	46.6587	45.0922
Aco004007	36.9382	47.2795	55.1465	30.6148	45.4143	50.8115	43.2063	43.9154	42.5374	50.3626	37.7544	39.4004	66.2549	48.5385	41.2404	42.3883	35.4473	53.2568	66.5134	50.5058	39.2739	65.7809	55.3707	53.2341	33.2098	43.2681	49.1191	42.4382	52.6764	51.9765	30.2019	38.5985	36.5894	51.2738	65.1212	51.9675
Aco003947	42.4484	47.4481	53.5702	34.5983	43.4503	48.3473	48.7447	46.6106	48.3866	61.0423	46.3166	51.1639	65.0323	52.4791	48.0009	53.0212	45.0728	55.1787	64.2198	43.2761	50.9967	69.2846	63.8722	50.8528	34.547	60.9527	56.9417	63.9504	41.3227	39.2802	55.155	50.3844	51.994	53.1369	47.0156	50.1723
Aco018581	73.8279	69.0692	73.9173	63.4245	63.6092	68.645	77.0086	62.4574	60.3354	67.8712	70.6164	66.8104	80.3338	63.6758	60.1081	89.7887	70.5141	72.0882	93.4021	57.7056	74.6868	92.6776	86.4003	72.0151	65.1348	68.9463	64.6085	86.6774	73.5932	59.2002	62.9464	74.2044	78.201	70.9768	80.1722	78.9428
Aco000467	29.8284	28.4047	33.5521	25.0701	26.7025	35.1374	29.7823	29.2406	31.4344	42.7881	30.4069	29.262	42.7134	34.2162	31.5802	32.6983	34.7096	38.9919	35.7544	37.7812	42.5352	32.3228	30.4659	30.7203	30.912	33.5612	31.8745	30.3168	38.763	32.0228	38.1204	37.5206	41.1955	38.7256	38.4263	40.6318
Aco004021	22.4916	24.3372	30.0747	20.8128	23.1544	27.0624	28.7597	23.9257	22.4704	33.2558	20.0292	24.3988	29.0099	23.0601	20.553	30.6485	23.5862	22.7705	30.2908	35.7325	26.2229	30.3313	29.8818	22.9035	21.211	28.699	34.9701	26.2051	19.0478	19.9509	27.2695	20.2395	23.4873	27.9051	25.1429	25.097
Aco007490	54.7284	56.5545	62.2334	49.6696	50.6515	45.6646	47.9692	42.9812	41.8302	62.8076	43.6101	47.1879	55.5586	46.3832	36.4944	51.6359	35.6833	40.2618	58.2747	42.0366	34.546	61.5285	55.873	55.722	30.9513	45.2571	57.0782	49.0517	45.3467	40.881	28.1316	31.2	32.2003	53.8097	47.2174	52.4754
Aco010257	34.2195	35.4222	33.6162	32.5332	34.6249	26.5117	44.2923	33.4016	27.2451	52.5457	26.8018	19.9971	49.8487	36.4028	22.5644	35.4423	34.6824	29.3139	52.5698	52.0852	30.6964	35.3725	47.275	51.5423	31.7479	39.537	49.7139	32.9578	27.4554	27.024	28.8562	28.3077	34.3996	45.0722	43.3246	37.08
Aco002978	11.0255	9.66278	16.6762	11.4343	11.3058	16.2358	12.7563	10.4547	12.7723	10.5463	11.314	15.1149	17.3485	12.0304	12.8871	18.9733	9.86279	11.197	15.8424	7.16781	11.0929	18.4393	16.23	7.23109	11.584	12.5579	17.1105	13.3847	13.3836	12.3645	13.6079	10.5083	11.9336	12.4863	9.61207	14.1142
Aco008794	177.807	114.017	219.492	179.822	118.354	202.26	301.003	162.218	245.137	295.249	143.802	210.917	354.693	138.112	224.443	352.441	176.229	368.203	355.037	260.221	363.855	362.285	292.152	260.21	220.807	337.057	256.13	255.927	336.063	296.259	168.587	287.963	364.029	271.986	317.69	254.895
Aco012421	17.5516	18.1346	23.681	14.8198	16.3323	24.9174	23.4964	21.149	24.7004	25.0097	14.9989	21.8037	28.8301	18.8259	17.3467	32.3965	17.9972	19.1711	32.2316	12.8765	22.2139	29.6391	28.968	11.397	27.041	17.5672	25.8262	30.264	22.3454	22.7142	12.2408	13.7936	13.9932	17.0231	26.4969	19.4956
Aco017005	34.7078	34.6908	40.3533	26.433	28.9812	34.4708	36.6881	37.7271	42.0486	28.4017	22.0825	32.9091	42.1531	33.9141	34.8138	37.9115	33.5747	45.4259	48.2915	42.0807	44.2773	47.8916	44.4128	31.9239	37.5139	45.0139	51.5465	31.4568	26.2305	26.7017	38.4244	31.9988	46.0581	50.7601	42.9909	50.3731
Aco010482	60.5707	39.5049	53.9073	51.2359	43.3512	49.3654	58.0307	35.9855	74.8459	60.1752	35.4775	55.5091	50.587	27.7032	71.4661	73.5365	44.7974	62.1877	50.6388	48.7171	77.9028	41.6304	67.9056	47.182	52.291	64.9361	62.962	73.3495	54.9472	53.6313	36.3072	34.7775	36.8111	75.7228	66.14	59.1834
Aco015043	33.9102	41.0637	36.1621	24.0448	41.9875	31.7189	25.3417	40.3264	34.4395	30.9184	32.6557	28.5761	26.4682	37.3822	28.9778	24.685	39.3058	31.0652	38.9253	40.2872	32.8035	33.1688	30.5829	29.7535	25.2697	33.7808	24.532	27.3174	33.516	29.2238	36.542	38.6218	38.7144	35.7336	31.6969	31.2896
Aco017783	187.857	145.633	144.812	165.425	114.458	117.355	203.147	121.875	85.0192	212.643	106.45	85.0628	178.828	115.04	82.79	131.922	98.37	117.601	199.163	108.678	142.16	209.879	193.167	158.948	82.3629	122.387	210.584	120.031	160.385	99.9143	85.1221	87.8509	85.1118	151.771	156.232	162.464
Aco003591	8.56828	9.82724	11.8657	7.13569	10.4553	13.2632	9.20023	13.9309	9.96623	11.8968	10.6491	9.03718	14.1132	13.5012	9.63707	11.4906	11.6714	11.8969	14.7747	11.6253	12.7978	10.3738	9.97296	9.09922	7.15658	9.51165	9.2587	8.77399	12.7151	14.1334	14.1352	15.0901	14.0883	11.464	14.5686	14.6511
Aco018396	35.2937	39.3908	38.6293	26.8777	38.9941	36.5862	34.5523	42.2337	37.1987	39.2377	36.7959	35.3788	39.889	37.9814	36.123	36.0392	30.93	38.5723	36.9445	39.2887	27.9836	48.1054	41.4073	38.7643	35.9868	49.3663	40.3515	38.0019	46.6214	44.9022	38.1001	31.56	36.233	34.328	37.0681	32.4888
Aco005260	70.3007	52.5881	96.9221	67.0349	59.2218	86.7375	94.8333	64.8895	108.38	79.5268	57.859	88.9126	95.5076	62.6949	99.9068	127.731	67.5722	103.616	128.243	105.462	116.38	131.57	107.716	59.2009	76.179	98.4001	109.784	112.215	117.901	89.0015	106.711	116.319	120.372	109.583	101.775	95.9335
Aco009684	85.7503	64.1193	64.2363	80.4179	62.7888	60.3597	96.6008	56.6479	60.9263	88.545	49.1681	61.4399	79.2322	51.8676	71.5519	74.3964	68.3174	75.3931	102.255	104.182	80.5933	100.996	99.3871	72.0246	56.6461	91.7062	89.5774	89.2435	61.0721	51.7903	49.2752	42.0412	47.938	93.5621	86.9963	78.5345
Aco017977	27.3065	26.7969	31.5687	25.8666	23.5702	28.9071	28.7942	26.4487	27.0845	34.4032	20.4903	24.4162	32.0652	23.5647	26.4558	24.9255	21.7445	28.9317	34.8668	34.6265	28.5974	32.3989	33.1437	28.6177	22.6089	32.982	36.2966	28.2975	30.4921	26.579	16.5784	19.4523	17.6319	34.7122	32.6755	31.5543
Aco002191	67.4738	69.431	73.6886	50.6929	58.3063	63.1483	64.4632	59.1912	56.1878	74.7731	53.5374	54.4915	78.4465	63.1889	54.6148	57.162	56.7292	68.9986	86.0545	72.99	65.6203	89.4317	73.1221	78.9061	50.8593	88.1214	74.4796	67.9269	62.8743	55.7517	50.236	58.5891	54.9878	87.7481	78.2733	77.7237
Aco023943	52.6782	44.215	58.2026	48.912	47.4959	57.0958	76.8566	58.6088	72.205	61.0112	48.6275	86.6624	75.3625	49.892	82.1626	95.8984	52.8527	76.6836	94.7188	56.9184	71.5032	100.911	94.637	60.2601	54.2201	75.624	94.7228	91.6871	81.0049	63.8552	94.715	94.322	93.3573	79.1722	88.0638	74.9763
Aco003299	42.8899	43.6483	42.1078	33.034	37.5221	37.9956	42.0336	37.0106	38.0902	52.4593	34.5361	33.5777	47.5382	35.5235	28.1583	38.2495	33.0138	31.9575	43.0904	38.3251	27.7241	55.3082	56.1796	50.8464	28.0741	42.6075	51.1954	52.1035	30.4022	30.1258	25.991	24.1483	26.067	49.4076	42.0769	37.085
Aco004120	27.8312	34.0099	32.3879	23.8345	29.4562	31.4091	24.4294	27.3986	24.8215	28.3374	30.7723	26.9549	38.2034	38.9793	25.425	27.1605	29.2839	37.7562	35.9953	36.9551	33.214	37.8608	28.585	32.9617	22.8554	38.2737	25.7325	24.4835	29.1022	26.2254	36.2009	41.2827	35.3199	32.7039	38.7592	32.9011
Aco001521	4.56873	4.44335	5.21604	3.73779	4.59823	5.57233	4.67781	5.3297	8.44673	5.12303	3.71895	8.67549	6.87423	3.46721	9.27595	10.011	4.31508	8.81842	6.50446	6.4904	9.05522	10.7056	10.3872	3.74216	6.27555	10.4585	9.09175	7.37555	9.11277	5.23498	8.12234	6.28646	8.98443	6.25082	7.71687	7.11186
Aco017021	17.7074	20.0566	20.6307	16.3222	21.5961	23.2821	26.7128	19.1418	14.6758	25.0222	21.6254	19.0921	28.2255	23.2978	19.7594	21.6696	18.41	22.1189	24.573	16.8542	15.4055	21.591	23.5108	23.53	16.6	21.8225	21.3756	21.1707	19.7774	19.8713	22.706	24.4345	24.6159	18.5456	23.3401	21.1011
Aco010192	21.2209	20.191	18.1012	21.3565	19.3381	19.3778	29.5566	20.6059	21.5914	31.0201	18.5404	20.1222	31.1354	19.0395	24.9681	34.8403	21.0315	25.1764	33.7264	33.4177	27.7273	31.8136	28.8795	17.7255	16.412	26.5768	34.9826	31.1118	31.8529	21.477	15.677	14.6769	19.7091	25.9666	26.9134	25.4052
Aco001347	45.8969	51.4085	51.0382	44.8869	46.6191	49.0499	53.1121	47.8134	62.419	58.5583	47.13	58.7862	40.4136	49.8696	67.6694	43.4621	47.2433	66.7028	63.9318	66.3918	60.2483	54.0889	50.4915	59.9527	61.8822	73.6904	46.678	52.9405	63.0304	66.2456	72.662	65.1771	58.5137	70.1352	73.5498	72.7487
Aco006138	102.447	118.375	83.8873	92.6344	105.189	80.1719	113.085	78.9524	62.5692	112.11	85.5724	49.2695	86.792	79.9241	48.7412	109.694	79.0888	48.5507	107.983	67.2575	58.7739	129.498	125.128	126.564	59.9787	66.2544	120.793	86.9482	83.9513	45.0324	68.1578	87.9843	89.0857	75.8999	88.8594	76.8009
Aco001794	230.258	208.08	145.958	211.1	144.266	100.757	205.188	125.236	95.5032	211.676	128.088	73.3182	176.401	138.945	99.1314	183.017	153	130.858	189.394	151.754	170.557	166.226	193.572	208.993	99.2022	175.212	207.611	225.746	166.313	132.987	123.115	98.8992	98.076	239.892	206.091	210.251
Aco017180	12.2701	18.5105	13.0963	14.8512	19.8416	16.1934	16.8928	27.0467	17.9862	14.1374	15.8519	18.5118	18.4587	19.7193	23.3464	15.0033	23.3352	21.1392	20.154	26.6415	22.0947	27.6588	20.8067	14.5848	21.3232	20.4387	22.087	20.0788	26.0433	22.0222	16.8825	26.4719	25.5373	22.787	22.5295	21.261
Aco023256	17.3624	21.3373	23.1042	15.7565	24.2475	24.4665	27.8321	27.0516	20.7545	22.1938	25.1025	21.5055	27.5494	24.3998	20.7467	26.3339	23.7698	25.0097	31.0187	28.6788	18.4955	31.4485	28.0975	19.4397	29.7936	21.6072	30.802	28.4291	30.1548	30.3849	20.5403	21.9805	21.7933	19.9876	24.3216	17.2274
Aco017827	14.4114	16.5233	15.8118	12.1883	15.9547	15.3168	14.865	15.5447	15.7275	16.6407	13.0256	13.6342	20.8563	16.9564	15.5203	14.3996	14.6678	16.0348	21.2107	17.4201	16.1544	21.5394	16.5052	15.6358	11.8407	15.0332	14.7336	18.3051	15.6029	16.4228	13.9832	17.2662	16.3554	21.7273	19.3715	19.9034
Aco010306	16.2166	17.6237	20.1625	14.0629	17.5785	21.0338	17.7652	19.3707	20.4339	28.4217	20.7192	19.428	27.9279	20.6985	18.3675	18.8	18.9408	19.4137	28.9455	16.4803	18.6235	22.8989	25.5243	19.564	20.6735	19.0023	28.0321	24.1236	26.3038	28.4076	19.4112	17.3907	18.0508	19.6714	21.8396	20.7388
Aco024845	33.3099	31.2867	41.5169	26.2119	26.6443	37.2035	38.4705	31.3665	43.5103	44.5782	26.6154	41.3402	51.536	32.1836	43.8078	40.6258	33.625	46.5905	49.483	45.6952	33.9269	47.7567	49.2763	29.3847	30.0398	43.9743	44.5361	25.7939	19.9098	21.2034	39.8326	36.3981	41.7111	40.266	42.1427	37.7502
Aco018840	38.5353	41.9382	40.5478	34.0526	37.3067	34.5122	33.68	32.1911	21.948	36.6708	26.7916	17.2101	31.1162	29.8097	18.4958	21.0125	27.4865	26.8071	41.677	36.8767	31.4977	40.2743	32.7417	35.9707	30.0087	33.1134	37.1431	23.1789	21.4917	24.4285	35.7055	30.8294	36.6133	33.5902	37.4703	33.1686
Aco005837	75.0277	93.5308	100.236	69.2934	94.4188	105.039	71.5667	96.351	85.5869	77.8579	92.2393	90.2338	86.4004	99.2674	90.9548	85.4255	94.655	88.4275	102.662	94.4154	103.679	77.9906	70.6619	82.2121	81.7367	97.0225	68.1227	78.9787	105.048	107.513	104.983	76.5268	85.6675	105.009	100.167	115.06
Aco005147	46.497	47.6389	33.4692	47.6789	42.4164	36.2775	34.5181	29.2225	30.9708	35.3139	33.1051	29.803	38.9428	35.7529	27.6446	38.2393	33.4385	30.7676	42.5633	47.4404	34.2348	35.3573	31.8612	39.6005	19.8817	37.1968	34.8995	35.7726	36.6341	27.2869	33.7621	28.1319	26.6701	41.9122	43.7798	42.028
Aco021718	21.4318	21.4772	20.8172	19.7626	19.7383	20.3173	25.6511	21.2005	20.7094	26.2269	19.1015	20.8704	25.2738	17.8388	19.5782	23.1426	21.4754	23.4336	26.3404	25.443	24.3664	29.4012	29.4472	18.0599	16.4722	21.6691	30.4325	22.1201	15.8806	23.6945	25.2915	26.4749	26.5392	24.3792	20.5481	25.1185
Aco021015	24.8671	27.4951	33.7433	20.5044	28.0979	32.0604	33.1594	31.0112	36.0136	30.2876	24.5561	34.4642	39.0981	31.8819	31.4347	34.5249	34.2397	41.6041	43.3808	36.7076	38.2309	39.7222	39.1944	23.219	28.5245	34.2512	36.0647	31.7549	39.2773	38.4049	32.2621	31.3616	35.3659	45.5462	41.8059	42.1532
Aco027022	3.98289	4.46507	5.55987	3.83223	3.21379	4.28177	4.37216	3.07054	4.83578	6.10283	5.0428	5.7251	6.37392	3.87666	4.76051	6.5557	3.53041	6.78381	7.58926	6.47542	7.2421	7.35536	7.01594	4.02281	3.37565	4.81373	7.20458	4.00607	5.56363	4.05196	5.46152	6.07327	6.69286	5.64011	6.43966	5.86591
Aco005880	121.528	108.994	121.027	90.7405	81.673	96.8003	96.9433	63.5448	87.9351	87.3574	72.368	89.6903	80.4085	78.2176	90.1604	85.5945	72.9091	82.1774	97.5593	71.499	99.1775	92.601	100.084	84.458	74.2944	109.858	104.318	88.7738	106.477	75.6534	88.7309	86.7606	91.2509	100.118	110.98	121.55
Aco031020	1.77036	3.06971	2.86323	4.69505	4.13605	3.17478	6.10948	2.46009	3.0499	2.93637	3.80265	4.8414	5.50193	2.57803	4.1598	4.81651	3.41283	3.24871	5.36476	3.7229	3.00985	3.89948	5.8699	5.02962	2.45752	5.20047	5.65558	3.94147	3.57385	2.29494	5.95665	4.39861	4.44605	4.32179	4.91171	2.58432
Aco001991	23.6555	31.3831	27.2305	23.7618	26.4063	24.0461	19.0927	23.3285	19.4576	28.3332	24.933	23.0288	25.2764	26.479	21.7461	20.47	20.3645	25.0413	27.2221	14.5561	19.4212	27.9626	19.6454	18.2219	12.1608	29.9013	21.4129	23.417	22.2774	19.3662	22.5853	23.5749	23.0203	22.4165	20.9127	23.9991
Aco018633	35.0809	34.8584	32.15	37.1941	31.8752	29.9583	39.3114	29.4534	26.5756	45.2839	25.9182	26.1056	51.6061	32.1685	26.8795	41.7112	29.465	33.5111	54.4178	40.4296	39.6072	52.5036	46.9147	41.7305	22.6309	40.2836	53.7728	42.4316	27.6732	26.0461	33.6451	29.984	34.4319	45.3779	38.1377	38.7227
Aco011848	57.0582	54.8597	54.4862	48.5884	51.5737	50.7299	44.6682	50.0505	43.1404	63.1268	41.9698	34.9638	54.8169	47.6535	38.8637	39.0983	39.8743	40.1363	59.6862	48.6058	44.5914	45.0847	51.9669	56.2324	40.8146	47.4118	57.3294	48.5775	50.1892	47.2297	36.3715	28.9462	29.6255	49.2747	48.4118	50.8557
Aco003259	44.3784	46.856	40.2225	39.4478	40.7053	37.1215	41.3113	36.8606	26.22	52.4837	37.7183	23.6284	48.3453	46.3079	22.4391	46.4314	43.2627	31.5108	51.7347	54.9682	39.0988	46.4275	47.2117	55.4705	26.3216	45.2406	44.2582	34.5827	25.9431	26.5687	41.924	31.3956	38.1957	39.213	38.3774	46.5874
Aco010270	5.77404	6.82074	11.4916	5.38734	6.93694	10.5492	7.03555	9.34598	13.3329	6.81225	6.40393	12.0165	8.1446	9.38912	12.7934	8.314	8.66588	13.0739	10.5846	8.76212	11.5511	9.41209	10.0318	6.59366	9.64986	11.3217	11.8966	7.41175	7.74649	10.2274	10.6005	10.0468	13.268	9.59292	10.9865	9.57923
Aco028822	21.7815	20.2689	15.978	17.0105	15.5323	13.3642	16.6189	13.0047	10.7046	23.0661	12.8024	9.04725	22.9786	15.1788	12.7954	24.2593	16.4452	13.2618	25.6715	14.0724	12.2174	13.3542	24.5568	25.4418	13.5585	17.0406	20.5745	16.3427	16.2706	16.362	20.8321	18.2922	18.1001	24.0251	21.2081	17.7647
Aco007126	30.4909	33.1716	29.2083	30.1543	33.1702	23.093	28.1088	23.1531	16.5897	31.883	21.2824	16.5653	29.0352	28.5745	17.6699	27.8593	25.0456	19.2108	24.9859	17.5479	21.5953	23.1642	24.1351	26.0363	11.8997	24.3192	24.1369	30.8263	18.5072	17.9495	11.5106	16.6275	22.9768	22.8884	24.1573	23.5114
Aco025214	81.6468	71.1204	70.9458	71.4769	61.095	63.2448	56.9261	53.4727	66.876	62.3637	54.7497	54.8275	51.9019	54.0746	56.8635	68.3557	47.0586	44.3615	65.7036	43.9569	47.0009	52.8261	64.6009	62.2053	54.5642	70.8773	73.1625	79.3749	65.1146	66.0115	58.9498	59.123	66.5396	54.2546	67.4829	48.6034
Aco030406	46.2605	39.7407	27.0413	50.0128	35.8774	33.6166	55.5616	39.2504	27.9367	58.9258	39.0437	26.0187	53.7241	39.463	24.7925	55.5296	49.63	32.0242	43.0639	51.0915	39.7573	48.0708	51.8639	45.6914	42.3834	36.6429	54.5938	51.0522	48.6199	43.1142	15.3212	20.0791	16.8732	52.3175	48.5725	45.0595
Aco021628	46.5785	57.7372	58.7371	42.6461	54.7506	56.4744	60.4917	52.6536	48.6142	63.5813	55.5018	55.5825	75.8251	57.6083	47.9337	60.9541	41.8653	55.0802	66.5332	42.0371	43.6441	60.9922	68.4746	51.5162	34.0843	59.0401	71.4533	64.75	65.6149	56.6201	49.3879	58.9367	61.4521	51.8483	59.9622	59.8845
Aco006966	24.941	33.6934	24.6259	30.8548	21.854	23.8054	21.6982	22.7691	20.1686	33.5168	24.8165	24.0774	30.4339	26.3564	27.7979	32.4126	34.3027	23.8842	28.4522	34.7742	31.8229	34.1405	23.4561	26.6494	20.2197	31.371	17.4435	29.9735	23.2195	18.5362	32.0716	27.1923	37.6254	33.5477	35.906	33.179
Aco026657	8.38822	6.34098	6.4466	7.78525	6.72585	8.38265	9.2843	6.8074	7.49584	11.6773	5.44418	7.75623	10.766	6.90498	6.6972	6.93918	6.01954	7.7264	11.9211	10.018	5.2409	10.7882	11.082	6.05445	7.34875	7.5076	11.8348	9.55995	9.98366	9.01623	6.12729	7.64707	7.71953	10.1082	9.13416	9.23006
Aco019707	55.9364	71.834	60.4094	55.0727	69.6483	59.0643	68.9144	81.1792	59.1759	83.8204	78.6686	53.3267	95.501	83.5749	58.5497	79.7351	77.5233	68.0042	94.4809	80.9223	66.5483	73.5313	78.6731	54.1253	66.7821	67.1583	90.0787	84.3192	84.3612	78.4251	61.4489	48.8132	54.1594	76.6147	64.039	69.2234
Aco000172	43.8625	35.0761	32.5524	36.1793	35.291	31.0748	36.4094	32.8454	27.6776	50.4614	32.6086	25.8376	38.9666	33.8221	25.87	40.4333	32.6359	29.6033	48.2019	45.4513	34.6772	38.6784	44.3154	46.0624	26.1881	40.1961	44.2918	34.4223	31.8096	27.8512	28.9493	27.7854	30.9677	43.4163	45.4878	40.5959
Aco023424	30.3429	18.57	24.4518	27.6759	26.9694	17.7735	34.8418	29.2212	23.0122	35.6887	24.3602	20.2428	29.7047	19.9272	19.11	36.172	37.496	18.7252	33.6639	38.0823	32.7868	37.8063	40.0443	34.5525	25.2468	32.7578	35.9238	33.3119	28.1899	20.9824	23.5165	29.0378	31.3565	37.5775	40.7149	29.1302
Aco013569	41.6407	48.3681	41.5565	39.0691	38.6708	46.7692	43.6144	38.2365	32.4377	52.5913	39.6341	27.421	50.9958	43.8215	28.1567	44.0601	35.5884	30.906	44.5942	35.5534	29.4378	44.3277	47.3164	51.5519	24.1564	35.7707	45.8241	34.5312	31.0961	27.5273	17.5421	21.726	18.8737	31.7292	32.2137	33.0875
Aco027432	5.46043	7.38166	6.50866	6.7599	7.38179	7.29556	6.68368	8.21108	7.15398	8.50248	5.92882	5.7386	8.08094	6.11814	6.90735	7.63439	6.57268	7.75249	9.15822	8.64565	8.26432	7.62383	8.35662	5.81571	5.82662	8.43653	6.88933	7.53512	6.57087	4.8117	5.68792	5.5655	4.52419	6.06189	6.22935	6.21817
Aco004804	17.7394	14.0651	17.1778	17.2995	18.0365	17.2785	19.0435	17.3742	9.75107	19.5901	13.0971	12.1122	22.0627	12.6088	8.46154	18.7486	11.5028	10.0869	18.9522	17.8899	14.1078	21.0588	16.8253	14.8572	10.5542	10.6705	15.9535	16.4747	13.1066	10.9131	11.1213	16.4317	20.7443	9.48784	11.6008	8.26032
Aco015263	18.6527	18.3585	16.6866	17.7714	14.3728	15.4907	23.0511	13.5665	15.9422	17.3916	15.1112	14.3834	22.8918	15.1076	16.8473	23.2895	11.9095	23.0972	27.0834	11.1266	20.6529	24.0095	26.2734	14.9794	11.9204	20.5588	21.0476	15.9044	19.1188	13.6988	17.6681	19.176	21.4254	23.2206	22.7479	26.8319
Aco010152	142.208	135.471	108.103	132.803	115.71	91.4214	147.602	94.0961	65.8617	159.404	93.6009	70.1528	135.692	96.1296	67.4981	120.074	82.8651	72.3573	151.878	86.378	75.3857	158.427	144.716	134.457	70.6946	104.741	151.997	126.824	111.291	99.5957	76.1038	72.1187	73.5528	93.1892	103.886	94.0229
Aco005320	28.306	21.6617	29.0691	32.0495	26.1542	25.1122	29.2942	19.9356	15.8736	31.7994	22.0461	19.277	25.8796	20.449	17.5884	25.8623	20.4215	14.1388	25.2343	10.3741	14.2424	30.3658	31.1042	26.661	15.5913	13.7789	33.5132	24.4648	21.1064	21.0531	12.1448	9.00272	15.6512	15.4264	21.6609	17.9395
Aco016135	36.936	38.6549	36.0476	36.644	41.5384	32.2154	35.3187	27.6573	22.5498	38.251	33.4423	24.4397	32.3503	30.9717	21.3002	33.6275	32.016	18.8486	37.7471	24.5748	23.952	34.7869	32.84	32.0581	22.9005	25.3749	31.6457	38.812	30.3366	33.228	29.7385	31.9182	30.5497	25.9167	30.4247	27.0668
