# Supplementary material for: Comprehensive tissue-specific transcriptome profiling of pineapple (Ananas comosus) and building an eFP-browser for further study
Source: PeerJ. 2018 Dec 4;6:e6028. doi: 10.7717/peerj.6028 (PMC6284516; doi:10.7717/peerj.6028)
Supplement: Supplemental Information 10 [file peerj-06-6028-s010.xlsx]

## Sheet: Sheet1
Table S4. Expression patterns of specific-expressing genes of pineapple
	Bract	Core	Flower_disk	Leaf	Ovary_wall	Ovule	Petal	Placenta	Receptacle	Root	Sepal	Stamen	Stem	Style
Aco000005	0	0	0	0	0	0	0	0.194569	0	0	0	0	0	0
Aco000042	0.106448	0	0	0	0	0	0	0	0	0	0	10.7134	0	0
Aco000225	0	0	0	0	0	0	0	0	0	0	0	0.263533	0	0
Aco000227	0	0	0	0	0	0	0	0	0	0	0	10.3935	0	0
Aco000263	0	0	0	0.095812	0.094833	0	0	0	0.149652	0	0.10657	7.75384	0	0.158032
Aco000379	0	0	0	0	0	0	0	0	0	0	0.526288	0	0	0
Aco000421	0	0	0	0	0	8.57037	0	0	0	0	0	0.801253	0	0
Aco000526	0	0	0.083993	0	0	0	0	0.122931	0	0	0	13.0948	0	0.560266
Aco000528	0	0	0	0	0	0	0	0	0	0	0	0.984796	0	0
Aco000529	0.081036	0	0.31083	0	0	0	0	0.082098	0.213383	0.164069	0	400.602	0	18.4844
Aco000536	0.650205	0	0.250185	0.920155	0	2.48574	0.358547	0.16908	0.235228	113.712	0.541788	0.612718	7.21537	0.328655
Aco000570	0.201857	0	1.49976	0.091387	0	0	0	0	0	22.9431	0.343293	0.254097	0	0
Aco000616	0.309862	0.083196	0	0	0.201555	1.62839	0	0.104284	0	0	0.241293	34.8698	0	0.951295
Aco000620	0	0	0	0	0	3.71443	0	0.271603	0	0	0	0	0	0
Aco000633	1.59598	0.621586	0.419226	59.0227	0.458119	0.704679	0.840458	0.289594	0.131912	0.593773	1.09999	0.335906	0.08988	0
Aco000667	0.189634	0	0.686013	0.187558	0	0	0	0.186418	0	1.48443	0.392096	40.4987	0	1.78142
Aco000693	1.75819	2.6622	3.22104	0.616377	1.93146	16.1469	0.637114	1.97491	2.78807	3.15601	1.67896	348.487	0.709882	1.71695
Aco000714	0	0	0	0	0	0	0	0	0	0	0	0	0	0.393242
Aco000766	0.115567	0.115492	0.071263	0.045428	0.142708	0	0	0	0	142.934	0.165906	0.075384	0	0.150802
Aco000779	0	0	0	0	0	0	0	0	0	0	0.353971	0	0	0
Aco000810	3.79242	0	0	0	0	0	0	0	0	0	0	0	0	0
Aco000819	0	0	0.10829	0	0	31.9786	0	0	0	0	0	0	0	0.708023
Aco000872	0	0	0	0	0.361922	0	0	0	0	0	0	0	0	0
Aco000880	0.108537	0.379342	0.18796	0.11073	0.062379	0.520221	0.662154	0.247511	0.2599	0.258599	0	49.4229	0	0.761567
Aco000898	1.25929	0.191058	1.32127	0.175611	1.20985	0.168323	0.844312	1.80748	0.678786	0.481871	1.13154	282.446	0	22.0685
Aco000918	0	0	0	0	0	0	0	0.170204	0	0	0	0	0	0
Aco000973	0	0	0	0	0	0	0	0	0	0	9.5967	0	0	0
Aco001008	1.7795	0	0	79.8149	0	0	0	0	0	0.200291	0.873994	2.4188	0	0
Aco001044	0	0	0.67153	0	0	0	0	0.195216	2.01689	0	0	278.192	0	3.19486
Aco001089	141.906	5.01791	11.6306	4165.62	2.01239	5.93064	7.26963	1.68031	11.1314	5.10831	259.025	9.47794	1.49573	4.35298
Aco001136	0	0	0	0	0	0.5046	0	0	0	0	0	0	0	0
Aco001143	2.37379	0.949007	4.57147	0.155502	2.44844	0.538569	0.42055	7.94898	3.86726	0.700464	1.95683	1495.69	0.058049	93.6139
Aco001155	0	0.379557	0	0	0	0.066361	0	0	0	0.307716	0	25.736	1.40981	1.13928
Aco001157	0	0	0	0	0	0.407788	0	0	0	11.7857	0	0	0.390624	0
Aco001180	0	0	0	2.47669	0	0	0	0	0	0	0	0	0	0
Aco001213	0	0	0	0	0	2.09546	0	0	0	0	0	0	0	0
Aco001214	0	0	0	0	0	0.303746	0	0	0	0	0	0	0	0
Aco001285	1.68189	10.2199	0	2.53042	0.805334	0	0	1.21165	0	165.844	0.412412	0	0.222557	0
Aco001292	0.096263	0	0	1.11204	0	0.076151	0	0	0.071288	0	0	14.5987	0.197106	0
Aco001464	0.799801	6.45701	0.157574	0	0.758151	0.174034	0	2.60115	0.185449	156.908	0.164285	1.15581	0.833744	0
Aco001638	0	0.063262	0	0	0	0.063779	0	0	0	0.078903	0	35.2392	0	0.674146
Aco001656	0	0	0	0	0	0	0	0	0	0	0	0	0.166875	0
Aco001789	0	0	0	0	0	0	0	0	0	0	0	0	0	0.372876
Aco001822	2.60759	1.34834	3.36946	0.094587	1.3551	0.716976	0.055374	4.35768	2.9076	0.749679	1.01877	984.004	0	53.5759
Aco001823	0.087656	0	0	0	0	0	0	0	0	0.062076	0	2.8297	0	0
Aco001898	0	0	0	0	0	0	0	0	0	0.510571	0	0	0	0
Aco001907	0	0	1.25264	0	0	0.271654	0	0	0.113334	0	0	332.414	0	0.482142
Aco001920	0	0	0	0	0	0	0	0	0	0	0	1.03704	0	0
Aco001925	0	0	0.313383	0	0	0	0	0	0	0	0	0	0	0
Aco001956	0	0	0	0.142018	0	0	0	0	0	0	0	0	0	0
Aco001972	0	0	0	0	0	0	0	0	0	0	0	0	0	0.352451
Aco002011	0.561178	0.125178	0	10.4426	0	0	0	0	0	0.190268	0	0	0	0
Aco002050	0	0	0	0	0	0	0	0	0	0.247149	0	0	0	0
Aco002117	0	0.07534	1.18511	0	1.40114	249.534	0	5.48305	0.666712	3.93092	0.067513	0.358743	0	0.300941
Aco002150	0	0	0	0	0	0	0	0	0.269467	0	0	0	0	0
Aco002199	0.125576	0	0	0	0	0	0	0	0	0	0	0	0	0
Aco002225	0	0	0	0	0	0	2.75522	0	0	0	0	0	0	0
Aco002280	2.26011	0	13.6216	0.15029	0.063326	0.604275	0	0.331676	0.044778	192.171	0.622818	0	0.204278	0
Aco002290	0.084171	0	0	0	0	0	0	0.15856	0	0	0	60.0404	0	2.64637
Aco002333	0	0	0	0	0	0	0	0	0	0.230629	0	0	0	0
Aco002420	0	0	0	0	0	0.282425	0	0	0	4.02158	0	0	0	0
Aco002425	0	0	0.153109	0	0	0	0	0	0	2.17924	0	0	0	0
Aco002509	0	0	0	0	0	0	0	0	0.273005	0	0	0	0	0
Aco002553	1.38215	0.247299	5.57516	0.256002	1.70776	0.587977	0	3.02225	3.10272	0.30228	1.32011	1188.02	0	60.9934
Aco002622	0	0	0	0	0	0	0	0.113552	0	0	0	0	0	0
Aco002813	0	0	0	0	0	0	0	0	0	0	0	0.384997	0	0
Aco002893	2.68123	0	1.07895	308.066	0	0	0.479366	0	0.216878	0	2.25152	0.971699	0.190867	3.94538
Aco002998	5.46093	0.165284	2.7569	168.051	0.411304	0.652211	0.212377	0.129509	0.334487	0.888552	8.6796	0.1631	0	0.683614
Aco003027	0	0	0	0	0	0	0	0	0	0.334589	0	0	0	0
Aco003028	0	0	0	0	0	0	0	0	0	2.13846	0	0	0	0
Aco003038	0	0	0.644335	0	0	0.109294	0	0	0.082872	0	0.114491	14.6356	0	0.399173
Aco003055	0	0	0	0	0	0	0	0	0	0.337671	0	0	0	0
Aco003075	0	0	0	0	0	0	0	0	0	0	0	0	0.639237	0
Aco003189	0.210285	0.115747	0.243625	0.152644	0	0	0	0.06699	0	0.122685	0.249968	29.4774	0	1.36951
Aco003192	0	0	0	0	0	0	0	0	0	0	0	0	0	12.1726
Aco003312	22.2824	0	1.72903	828.205	0.196054	1.70638	4.0433	0.38783	0.443784	1.31866	13.8879	1.24331	0	0.914381
Aco003432	0	0	0	0	0	0	0	0	0	0.198257	0	0	0	0
Aco003546	0	0	0	0	0	0	0	0	0	0	0	0.558908	0	0
Aco003561	0.10059	0	0	0	0	0	0	0	0	0	0	0	0	0
Aco003573	2.80272	0.417254	4.0837	0	0.784209	1.0192	0.297314	4.33653	2.70334	0.58465	1.48083	538.806	0.106228	32.3138
Aco003644	0	0	0.403562	0	0	4.66842	0	0	0	0	0	0	0	0
Aco003679	0	0	0	0	0	0	0	0	0	0.577524	0	0	0	0
Aco003705	0	0	0.155261	0.659407	0	0.525975	0	0.730303	0	30.1272	0	0.608243	0	0.392923
Aco003716	0.106179	0	0	0	0	0	0	0	0	0	0	0	0	0
Aco003745	0	0	0	0	0	0	0	0	0	0	0	0	0.357247	0
Aco003766	0	0	0	0	0	0	0	0	0	0	0.628853	0	0	0
Aco003771	0	0	0	0	0	0	0	0	0	0	0	0	0.327058	0
Aco003775	0	0	0.072831	0	0	0.315019	0.307892	0.110702	0	0	0	485.225	0	22.195
Aco003799	0	0	0	0	0	0	0	0	0	0	0	11.0569	0	0
Aco003870	0.218752	0	0	0	0	0	0	0.300621	0	0	0	8.57122	0.359782	0
Aco003918	0	0	0	3.27822	0	0	0	0	0	0	0	0	0	0
Aco003955	0	0	0	0	0	0	0	0.154135	0	0	0	0	0	0
Aco003981	0	0	0	0	0	0	2.57152	0	0	0	0	0	0	0
Aco004125	0	0	0	0	31.4448	0	0	0	0	0	0	0	0	0
Aco004129	0.205457	0	0.175209	0	0	0	0	0	0.270971	0.152423	0	159.404	0	2.69141
Aco004134	0	0	0	0	0	0	0	0	0	0	0	18.4204	0	0.206641
Aco004196	0	0.167364	0	0	0	0	0	0	0	1.48374	0	0	0	0
Aco004207	0	0	0.6131	0	0	0	0	0	0	0	0	0	0	0
Aco004261	0	0	0.151653	0	0	0	0	0	0	0	0	0	0	0
Aco004263	0	0	0	0	0	0	0	0	0	0	0	56.0078	0	0.496712
Aco004283	3.30371	0	0.314596	154.692	0	0.2901	0.155947	0	0	0.229021	2.97844	3.77437	0.104636	0.167773
Aco004300	0.184557	0	0	0	0	0	0	0	0	0	0	0	0	0
Aco004322	0.102325	0	0	0	0	0	0	0	0	0	0	1.044	0	0
Aco004346	0	0	0	0	0	0.846903	0	0	0	0	0	0	0	0
Aco004351	0.150642	0	0	0	0	3.25878	0	0	0	0	0	0	0	0
Aco004595	0	0	0	0	0	0	0	0	0	0	0	0.12549	0	0
Aco004648	0	0	0	0.344767	0	0	0	0	0	0	0	0	0	0
Aco004657	0	0	0	0	0.372679	0	0	0	0	0	0	0	0	0
Aco004687	0	0	0	0	0	0	0	0	0	0.21199	0	0	0	0
Aco004709	0	0.206591	0	0.16743	0	0	0	0	0	121.06	0	0	0	0
Aco004710	0.298655	0.200931	0.117853	0.272837	0.521316	0.54969	0	0.329725	0	46.608	0	0.216151	0.25109	0
Aco004759	0	0	0	0	0	0	0	0	0	0	0	3.55531	0	0
Aco004790	0	0	0	0	0	0	0	0.277318	0	0	0	0	0	0
Aco004817	0	0	0.821414	0	0	0	0	0	0	0	0	0	0	0
Aco004818	0	0	0	0	0	0	0	0	0.472474	0	0	0	0	0
Aco004830	0	0	0	0	0.260502	0	0	0	0	0	0	0	0	0
Aco004846	2.35549	0.898009	3.93569	1.66204	0.636172	0.474592	0	0.165065	0	147.263	2.92964	0	0.182816	0
Aco004956	4.00484	1.3136	0.473589	204.182	0.632631	3.57346	0.264135	1.16713	0.78978	1.84849	8.1392	0.948922	0.815386	0.935108
Aco004980	0.085753	0.209172	0	0	0.343761	65.465	0	1.44784	0.102277	0	0	0.288171	0	0.133373
Aco004981	0	0	0	0	0	0	0	0	0	0	0	0	0	0.516741
Aco005156	2.9442	1.09285	0.50745	173.462	1.14792	0.557495	0	0	0.505536	1.93589	3.97841	0	1.07906	0.469648
Aco005249	0	0	0	1.24082	0	0	0	0	0	0	0	0	0	0
Aco005268	0	0	0	1.62054	0	0	0	0	0	2941.3	0	0	0	0
Aco005373	0	0	0.366793	0	0	0	0.129024	0	0.166962	0	0	253.723	0	12.0166
Aco005468	0	0	0	0	0	0	0	0	0.203557	0	0	0	0	0
Aco005492	4.41436	2.59305	3.0489	0.753919	5.57121	0.409643	0.242433	1.8865	1.55294	7.40328	3.0816	538.347	0.599161	1.36063
Aco005564	22.9009	0.146814	0	538.827	0	0	0	0.120365	0	0.34874	15.0683	0	0	0
Aco005612	0	0	0	0	0.201366	0.180424	0.218361	0.377323	0	9.65113	0	0	0	0
Aco005644	0.073573	0.09063	0	0.121205	0	0	0	0.057631	0.062484	0.152119	0	5.2352	0	0
Aco005733	0	0	0	0	0	0	0	0	0	0.157412	0	0	0	0
Aco005809	0	0	0	0	0	0	0	0	0	0	0	0.350305	0	0
Aco005882	0	0	0	0	0	0	0	0	0	0	0	1.19419	0	0
Aco005916	0	0.249957	0.443444	2.20156	1.19723	1.25816	1.53318	0.460672	1.50687	1.43419	0.799605	166.785	0.282925	9.4782
Aco005965	0	0	0	1.75126	0	0	0	0	0	0	0	0	0	0
Aco005985	0.580699	0	0	0	0	0	0	0	0	0	0	0	0	0
Aco006010	0	0	0	0	0	0	0	0	0	0.426081	0	0	0	0
Aco006026	0	0	0	0	0	0	0	0.207749	0	0	0	0	0	0
Aco006061	0	0	0	0	0	0	0	0	0	0	0	1.14147	0	0.048423
Aco006116	0	0	0	0.027588	0	0	0	0.27333	0	0	0	0	0	0
Aco006119	0	0	0	0	0	0	0	0	0	0.267494	0	0	0	0
Aco006155	0	0	0.107447	0	0	0	0	0	0.155317	0	0	166.125	0	6.39544
Aco006156	0	0	0.221379	0	0	0	0	0	0.419403	0	0	539.436	0	25.7705
Aco006217	0	0	0	0	0	0	0	0	0	0	0.158478	0	0	0
Aco006239	0	0	0	0	0.262739	0	0	0	0	0	0	0	0	0
Aco006242	0.208518	0	0	0	0	0	0	0	0	3.78017	0.068021	0.116924	0	0
Aco006262	0	0	0	0	0	0.232487	0	0	0	0	0	11.2742	0	0
Aco006333	0.526428	0	0	0.015901	0	0	0	0	0.568821	151.563	0	0	0	0
Aco006338	0	0	0	0	0	0	0.578749	0	0	11.931	0	0	0	0
Aco006346	0	0	0	0	0	0	0	1.37926	0	0	0	0	0	0
Aco006354	0	0	0.458195	0	0	0	0	0	0	0	0	0	0	0
Aco006397	0	0	0	0	0	0	0	0	0	0	0.102064	0	0	0
Aco006601	0	0	0	0	0	0	0	0	0	0	0	0.675799	0	0
Aco006656	0	0	0	0	0	0	0	0	0	0.113647	0	0	0	0
Aco006685	0	0	0.639791	0	0.157074	25.3947	0	0	0.325268	0	0.287195	0	0	0.128478
Aco006793	0.005298	0	0	0	0	0	0	0	0	1.35294	0	0	0	0
Aco006808	0.065401	0	0	0	0	0	0	0	0	0	0	0.601729	0	0
Aco006830	0	0	0	0	0	0	0	0	0	0	0	0.256608	0	0
Aco006848	0	0	0.465951	0	0	0	0	0	0	0.119916	0	131.941	0	2.42473
Aco006877	0.158767	0	0.383078	0	0	0	0.134346	0	0	143.08	0.144923	0	2.34248	0
Aco006923	0.639721	0.52929	1.4725	0.578637	0.430342	1.05083	0.620652	1.09915	1.73511	2.05371	0.388995	1183.23	0.211137	69.6688
Aco006925	0	0	0	0	0	0	0	0	0	4.68164	0	0	0	0
Aco007066	0	0	0.210611	0	0	0	0	0	0	0.069461	0	9.693	0	0
Aco007091	0	0	0	0	0	0.237694	0	0	0	0	0	0	0	0
Aco007116	0.378338	0.545272	0.103621	0.062508	0	0.146784	0.176868	0.170873	1.02615	0	0.253835	1076.81	0.080848	51.6678
Aco007129	0	0	0	0	0	0	0	0	0	0	0.148709	3.88083	0	0.18954
Aco007153	1.15071	0.461849	2.32866	0.033028	0.802996	0.226936	0.452642	3.09876	2.32285	0.665885	0.291403	1007.31	0.042144	56.5982
Aco007175	0	0	0	0	0	0	0	0	0	0.119513	0	0	0	0
Aco007242	0	0	0	0	0	0.452139	0	0	0	0	0	0	0	0
Aco007252	0.175887	0	0.069784	0.043167	0	0	0	0	0.235509	0.063457	0	93.5322	0	1.22053
Aco007346	0	0.418597	0	0	0	0	0	0	0	0	0	0	0	0
Aco007360	0	0	0	0	0	0	0	0	0	0	0	0	0.243971	0
Aco007367	0	0	0	10.1185	0	0	0	0	0	0	0	0	0	0
Aco007368	0	0	0	50.4181	0	0	0	0	0	0	0	4.92854	0	0
Aco007369	0.639266	0	0	68.5626	0	0.129346	0	0	0.082876	0.102553	0	3.86136	0	0
Aco007399	0	0	0	0	0	0	0	0	0	0	0	0.239584	0	0
Aco007400	0.062102	0	0.916258	0	0.088633	0	0	0	0.19032	0.077842	0	159.713	0	1.16463
Aco007424	0	0	0	0	0	0.065028	0	0	0	0	0	3.35514	0	0
Aco007433	0	0	0	0	0.247614	11.206	0	0.582439	0	0.312151	0	0	0	0
Aco007438	0.14636	0.145822	0.27807	2.14545	0	0.063796	0.137084	0	0.122177	0.147352	0.240257	54.2857	0.083446	0.072962
Aco007470	0	0	0	0	0	0	0	0	0.349722	0	0	0	0	0
Aco007477	0	0	0	0	0	0	0	0	0	0	0	0.240068	0	0
Aco007492	0	0	0	0	0	0	0	0	0	0	0	0	1.32678	0
Aco007497	0	0	0	0	0	0.500124	0	0	0	0	0	0	0	0
Aco007500	0	0.094586	0.352186	0	0	0	0	0	0	0	0	24.8048	0	0
Aco007510	0	0	0	0	0	0	0	0	0	0	0	0.256517	0	0
Aco007513	0	0	0	0.241681	0	0	0	0	0	0	0	0	0	0
Aco007678	0	0	0.091559	0	0	0	1.39888	0	0	13.9283	0	0	0.163685	0
Aco007758	0	0	0	0	0	0	0	0	0	1.0758	0	0	0	0
Aco007894	0	0	0	0	0	0	0	0.134677	0	0	0	0	0	0
Aco007900	0	0	0	0	0	0	0	0	0	0	0	2.27472	0	0
Aco007937	0	0	0	0.150427	0	0	0	0	0	0	0	0	0	0
Aco007944	0	0	0	0	0	0	0	0	0	0	0.429888	0	0	0
Aco007946	0.046852	0	0	0	0	0	0	0	0.009239	0.527745	0	4.91533	0	0
Aco007948	0	0	0	0	0	0	0.174614	0	0	0	0	8.80696	0	0
Aco007988	0.174987	0	2.23228	0	0	0.214265	0.171546	0	0.937635	0.056775	0	719.37	0	8.80279
Aco008006	0	0	0	0	0	0	0	0	0	0	0	0.269049	0	0
Aco008096	0	0	0	0	0	0.141362	0	0	0	0	0	0	0	0
Aco008116	0	0	0.112979	0	0	0	0	0	0	0	0	0	0	0
Aco008192	0.094348	0.157507	0.382946	0	0.149085	0.367728	0.048797	0.441445	0.47113	0.135071	0.175914	153.043	0.080465	5.86033
Aco008218	0	0	0	0	0.338076	0	0	0	0	0	0	0	0	0
Aco008230	0	0	0	0	0	0	0	0	0	6.6457	0	0	0	0
Aco008231	0	0	0	0	0	0.519214	0	0	0	7.12161	0	0	0	0
Aco008290	0	0	0	0	0	0.100676	0	0.092656	0.098868	0	0	10.1189	0	0.570382
Aco008346	0.104497	2.16296	0	0	0	0.233556	0	0.101793	0.141182	0.444728	0.114667	57.0447	0	0.477934
Aco008353	0	0	0	0	0	15.0183	0	0	0	0	0	0	0	0
Aco008359	0	0	8.76828	0	1.75361	334.145	0	4.72879	9.81521	0	6.31127	10.0215	0	1.44693
Aco008382	0.269962	0	0	0	0	0	0	0.140858	0	46.4923	0.25532	0	0	0
Aco008387	0	0	0.91597	0	0	0.251686	0	0	0	59.1408	0.213956	0	0	0
Aco008388	0.1504	0.322613	0	0	0	0	0	0	0	35.4838	0.406378	0	0	0
Aco008391	1.88874	0	0.977356	0.29182	0	0	0	0	0	46.2469	0.436898	0	0	0
Aco008507	0	0	0	0	0	0	0	0	0	0.250149	0	0	0	0
Aco008541	0	0.035253	0	0	0	0	0	0	0	1.47777	0	0	0	0
Aco008544	0	0.127672	0	0.080784	0	0	0	0	0	4.3327	0.102418	0	0	0
Aco008587	0	0	0	0	0	0	0	0	0	0	0.430305	0	0	0
Aco008601	0	0.9897	0.938362	0.164619	0.953987	0.25832	0	1.67525	0.438193	134.699	0.372429	0.186867	0.683742	0.2003
Aco008623	0	0	0	0	0	1.69371	0	0	0	0	0	0	0.183008	0
Aco008629	0	0	0	0	0	0	0	0	0	0	0	5.83396	0	0
Aco008713	0	0	0	0	0	0.141575	0	0	0	0	0	94.4354	0	2.42185
Aco008797	0	0	0	0.123736	0	0	0	0	0	0	0	0	0	0
Aco008810	0	0	0	0	0	0.114871	0	0	0	0	0	0	0	0
Aco008872	0	0.419459	0	0	0	0	0	0	0	0	0	0	0	0
Aco008901	0	0	0	0	0	0	0	0	0	0	0	0	0	0.788406
Aco008911	0	0	0.172475	0.071758	0	0.257959	0	0.177492	0.121093	0.202274	0.288878	87.6546	0	3.12717
Aco008961	0.374861	0.119737	0	0	0.103808	0	0	0.726315	0	0	0.129085	15.4998	0	0.434532
Aco008970	0	0	0	0	0	0	0	0	0	0	0	1.8462	0	0
Aco009056	0	0	0	5.21009	0.092077	0	0	0	0	0	0	0.531927	0	0
Aco009057	0	0	0.259982	0.085851	0	0	0	0.09156	0	0.507708	0	106.915	0	4.78003
Aco009071	0	0	0	0	0	0	0	0.22783	0.20097	0	0	11.3876	0	0.328635
Aco009072	0	0	0	0	0	0	0	0	0	0	0	0.714322	0	0
Aco009088	2.70623	0	0	76.5693	0	0.12331	0	0	0	0.20354	0.699658	1.15049	0	0
Aco009091	0	0	0	0.244665	0	0	0	0	0	0	0	0	0	0
Aco009092	0	0	0	0	0	0	0	0	0	0	0	0.193422	0	0
Aco009114	0	0	0	0	0	0	0	0	0.661652	0	0	0	0	0
Aco009183	7.72288	0	0.209781	206.796	0	0	0.16253	0	0.248121	0.797861	7.92051	0	0	0
Aco009190	0	0	0	0	0	0	0	0	0	0	0.118776	1.12186	0	0
Aco009350	0	0	0	0	0	0	0	0	0	0	0	1.09122	0	0
Aco009398	0	0	0	0	0	0.147732	0	0	0	0	0	0	0	0
Aco009504	0	0	0	0	0	1.37014	0	0	0	0	0	0	0	0
Aco009537	0	0	0.516653	0	0	18.281	0	0	0	0.315737	0	0	0	0
Aco009587	0.710898	0	0	13.1727	0	0	0	0	0	0.076573	0.366096	0	0	0
Aco009599	3.45913	0	0.455133	92.7717	0	0.182655	0.602885	0	0	0.137477	4.8331	0	0	0
Aco009600	5.3353	0	0.302064	177.627	0	0.226965	1.45061	0	0.278307	0.338144	7.03021	0	0.294184	0.446715
Aco009717	2.98276	0.201828	0	281.159	0.758855	0	0	1.00956	0.287413	0.34628	2.67559	0.273734	0.137397	0
Aco009724	0	0	0	0	0	0	0	0	0	0.151271	0	0	0	0
Aco009735	0.547494	0.317153	2.23627	0.674014	0.345069	0.671096	0	0.350278	1.56328	0.328016	0.488081	906.847	0.499355	0.831091
Aco009736	0	0	0	0.268885	0	0	0	0	0	0	0	12.9665	0	0
Aco009752	0	0	0	0	0	6.15088	0	0	0	0	0	0	0	0
Aco009753	0	0	0	0	0.420908	0	0	0	0	0	0	0	0	0
Aco009815	0	0	0	0	0	0	0	0	0	0	0	0	0.576673	0
Aco009817	0.190614	0	0	0	0	0	0	0	0	0	0	2.98911	0	0
Aco009856	0.586844	0	0	22.3959	0	0.095782	0.102009	0.079052	0	0	0.286367	0	0	0.056441
Aco009987	1.44272	0.316633	1.17411	0.459185	0.888581	0.236097	0	0.562832	1.47806	0.201438	0	143.147	0	5.70501
Aco010008	0	0	0	0	0	0	0	0	0	0	0.306787	0	0	0
Aco010134	0	0.385063	0.843334	0.132487	0	0	0	0.170533	1.23949	0	0	615.824	0	38.2445
Aco010160	0.342901	0	1.95981	0	0.403234	0	0	0.521141	2.18105	0.244532	0.796017	1307.97	0	69.3884
Aco010188	0	0	0	0	0	0	0	0	0	0	0	0	0	0.371384
Aco010225	0.116236	0	0.124792	0.133371	0	0	0	0	0	19.8596	0	0	0	0
Aco010242	0.175883	1.21173	1.29966	0	0	0	0	0	0.445416	0	0	126.766	0	5.57299
Aco010275	0	0	0	0.215208	0	0	0	0	0	0	0	0	0	0
Aco010313	0.035904	0	0.076168	0	0.112289	0.077498	0	0.099549	0.223828	1.1544	0	36.0336	0	1.64856
Aco010329	0	0	0	0	0	0	0	0	0	0	0	37.581	0	0
Aco010346	0	0	0	0	0	2.14914	0	0.430033	0	0	0.434193	415.201	0	21.0269
Aco010360	0	0	0	0	0	0	0	0	0	0.40209	0	0	0	0
Aco010371	0.483269	0	0.608375	0.665081	0.675476	2.39769	1.02858	0.575202	0.653556	0.828312	0.462008	154.871	0.261431	7.21669
Aco010429	0	0	0	0.244768	0	0	0	0	0	0	0	0	0	0
Aco010446	0	0	0.440783	0	0	0	0	0.438743	0	50.6704	0	0	0	0
Aco010471	0.074886	0	0	5.93091	0	0	0	0	0	0	0.075033	0	0	0
Aco010478	0	0	0	0	0.21534	0	0	0	0	6.26523	0	0	0	0
Aco010479	0	0	0	0	0	0	0	0	0	0.581653	0	0	0	0
Aco010524	2.72931	0	0.203873	155.952	0	0.504273	0	0.333434	0	0.316193	5.31057	0	0	1.03618
Aco010526	0	0	0	0	0	0	0	0	0	0	0	0.45869	0	0
Aco010561	0.145518	0.092899	0.223827	0.137383	0.149679	0.234409	0	0	0.159344	0	0.089455	367.132	0	17.5644
Aco010592	0	0	0	0	0	0	0	0	0	0	0.490871	0	0	0
Aco010601	0	0	0	0	0	0	0	0	0.214881	0	0	0	0	0
Aco010607	0	0	0.040187	0	0	0.029885	0	0	0	0	0	1.35658	0	0.085896
Aco010612	1.17545	0.49239	2.77705	0.548774	1.29839	3.50264	0.279548	0.498131	0.486805	0.627319	0.481125	706.083	0	34.7959
Aco010634	0	0	0	0	0	0	0	0	0	5.64986	0	0.105327	0.244868	0
Aco010635	0	0	0.07587	0	0	0	0	0	0	4.69438	0	0	0	0
Aco010704	0	0	0	0	0	0	0	0	0	5.1852	0	0.573893	0	0
Aco010765	0	0	0	0.460555	0	0	0	0	0	0	0	0	0	0
Aco010815	0.157428	0	0	0	0	0	0	0	0	0	0	0	0	0
Aco010823	0	0	0	0	0	0	0	0	0	0.21311	0	0	0	0
Aco010827	0.397475	0.31294	1.32374	0	0	0.756985	0	0.633145	0.249542	0	0.768205	1011.56	0	56.1932
Aco010851	0	0	0	0	0	0	0	0	0	0	0	0.29583	0	0
Aco010911	0	0	0	0	0	0	0	0	0	0	0	0	0.560133	0
Aco011077	0	0	0	0	0	0	0	0	0	0	0	0	0	0.222216
Aco011093	0	0	0	0	0	0	0	0	0	0	0	0	0.340062	0
Aco011125	0	0	0	0	0	0	0	0	0	0	0	0.117241	0	0
Aco011144	0	0	0	0	0	0	0	0	0	0.112045	0	0	0	0
Aco011217	0	0	0	0	0	0.192952	0	0	0	0	0	0	0	0
Aco011458	0	0.515079	123.402	1.17038	1.33877	5.71336	5.30469	3.72857	93.5107	1.21662	1.40212	29668	0	47.6181
Aco011459	1.16532	1.293	37.6439	0.658765	0.362815	2.29702	2.29942	1.77606	18.5435	0.580195	0.572167	6787.83	1.3384	16.2294
Aco011481	0	0	0	0	0.176988	0	0	0	0	0	0	0	0	0
Aco011580	0.078059	0.048167	0	0	0	0	0	0	0	6.39954	0	0	0.12181	0
Aco011581	0	0	0	0	0	0	0	0	0	0	0	0.125201	0	0
Aco011691	0.253699	0	0	0	0	0	0	0.158156	0.118717	0.101338	0	67.8226	0.353341	4.43267
Aco011705	0	0	0	0.266355	0	0	0	0	0	49.5065	0	0	0	0
Aco011719	0	0	0	0	0	2.46983	0	0	0	0	0.168368	0	0	0
Aco011738	1.03534	0.226942	11.971	14.7999	1.63996	657.773	0	1.67241	4.45484	2.65044	1.23652	0	0.634056	1.77117
Aco011748	0	0	0	0	0	0	0	0	0	0	0	2.1579	0	0
Aco011754	0.165913	0	0	0	0	0	0	0	0	0	0	0	0	0
Aco011773	0	0.400439	0	0	0	0	0	0	0	0	0	0	0	0
Aco011795	0	0.471835	0	0	0.042527	0.136474	0	0.055341	0.405894	0	0.046192	193.608	0	8.89424
Aco011804	0	0	0	0	0	0	0	0	0	11.2021	0	0	0.293155	0
Aco011816	0	0.201921	1.03966	0.055099	0.840335	0.210768	0.5888	0	1.07411	0.172308	0.062889	187.738	0.184809	1.34238
Aco011857	0	0	0	0	0	0	0	0	0	0	0	0.109185	0	0
Aco011865	0	0	0	0	0	0.181891	0	0	0	0	0	0	0	0
Aco011905	0	0	0	0	0	0	0	0	0	0.221853	0	0	0	0
Aco011924	16.3944	0.14156	1.89446	443.301	0	0	3.75979	0	0.39922	0.95074	16.4747	0.383962	0.295716	1.339
Aco011947	0	0	0	0	0	0	0	0	0	0	0	4.60791	0	0
Aco012096	0	0.2421	0.186978	0	0	0	0	0.501074	0.369293	0	0	98.096	0	3.41544
Aco012125	0	0.096925	0	0	0.10937	0.098566	0	0.046435	0.31224	0	0	91.1846	0	3.75573
Aco012134	0	0	0	0.594107	0	0	0	0	0	0	0	0	0	0
Aco012185	0.284572	0	0	0	0	0	0	0	0	0	0	0	0	0
Aco012276	0	0	0	0	0	0	0	0	0	1.23812	0	0	0.144393	0
Aco012293	0.067124	0	0	0	0.544154	0	0	0.29315	0	0	0.154181	22.9892	0	0.599161
Aco012393	0.070362	0.18678	0.692785	0	0.117537	0.143042	0	0.151504	1.17478	0.142524	0	251.896	0.164456	0.912644
Aco012412	0.512414	0.637188	0.425952	0.156055	0	0.169585	0	0.2448	0.180155	3.12349	0.380024	97.7824	0.091972	0.26541
Aco012447	0	0	0	0	0	0.109243	0	0	0	0	0	0	0	0
Aco012482	0.349363	0	0	0	0	0	0	0	0	0	0	0	0	0
Aco012493	0.442366	0	0	0	0	0	0	0	0	20.8148	0	0	0.908994	0
Aco012574	2.19004	0	0	97.5545	0	0	0	0	0	0	3.90937	0	0	0
Aco012590	2.39253	1.05632	4.1642	0.190469	1.38515	0.764332	0.241658	5.18656	3.18463	0.912273	1.11128	1272.21	0	65.3182
Aco012624	0.217353	1.87329	8.43545	0.199424	5.7566	656.743	10.0409	12.2029	3.19767	5.76813	1.12921	4.97032	4.19113	7.31969
Aco012701	0	1.0856	0.176298	0	0	0.079929	0.070484	0	0.096054	0.912973	0	64.1754	0	0
Aco012753	0.019917	0	0	0	0	0	0	0	0	0	0	0.358092	0	0
Aco012815	0	0	0	0.16945	0	0	0	0	0	61.0852	0	0	1.78792	0
Aco012825	0	0	0	0	0	0	0	0	0.150355	0.37302	0	4.28987	0	0
Aco012877	0	0	0	0.596062	0	0	0	0	0	0	0	0	0	0
Aco012890	0	0	0	0	0	0	0	0	0	0.303493	0	24.067	0	0
Aco012985	0	0	0	0	0	0	0	0	0	0	0	5.6456	0	0.398719
Aco013009	0	0	0	0	0	0	0	0	0	0	0	0	0.153248	0
Aco013012	2.03464	0	0.131461	163.507	0	0.061763	1.15217	0	0	0.281268	1.79872	0	0.051549	0
Aco013013	0	0.714715	0	0	0	0	0	0	0	0	0	0	0	0
Aco013040	0	0	0	0	0	0	0	0	0	0	0	0	0.762646	0
Aco013041	0	0	0	0	0	0	0	0	0	0.656624	0	0	0	0
Aco013061	13.281	30.119	7.42196	0.478174	5.74948	5.03677	4.39573	6.0192	10.7423	15.7289	9.48802	1.02096	1564.78	4.71119
Aco013065	0	0	0	0	0	0	0	0	0	0	0	0	0.353496	0
Aco013084	0	0	0	0	0	0	0	0	0	0	0.238464	0	0	0
Aco013161	0	0	0	0	0	0.135913	0	0	0	0	0	0	0	0
Aco013165	0.089523	0	0	0	0	0.126499	0.11456	0	0	5.65999	0	0	0	0
Aco013177	0	0	0	0	0	0	0	0	0	0	0	1.54289	0	0
Aco013203	0.297846	0.109835	0.428679	0.170741	0.358154	0.158302	0	0	0	46.654	0.18679	1.76116	0.181974	0
Aco013211	0	0	0	0	0	0	0	0	0	0	0	0.778728	0	0
Aco013217	6.56506	2.58567	13.9213	0.531698	0.839885	3.20991	0	10.6605	11.8212	5.42778	7.09982	2483.1	0.919296	159.411
Aco013296	0.030444	0	0	0.185123	0	0	0	0	0	2.93481	0	0	0	0
Aco013302	0.111444	0	0	0	0	0	0	0	0	0	0	0	0	0
Aco013334	0	0	0.481645	46.7171	0.395052	0.662913	0.470868	0.353005	0.9813	0.300677	0.642952	0.249726	0	0
Aco013340	0.00685	0	0	0	0	0	1.18907	0.193615	0	0	0.310967	14.4749	0	0.151652
Aco013385	0.104916	0	0	0	0	0	0	0	0	0	0	0	0	0
Aco013392	0	0	0	0	0	0	0	0	0	0	0	0	0	0.116408
Aco013426	0	0	0.205637	0	0	0	0	0	0	0	0	0	0	0
Aco013438	0	0.135494	0	0	0	0	0	0	0	0	0	0	0	0
Aco013443	0	0	0	0	0	0	0	0	0	0	0.164122	0	0	0
Aco013454	0	0	0	0	0	7.03589	0	0	0	0	0	0	0	0
Aco013482	0	0.076209	0.166697	0.143463	0.088885	0.19597	0.083083	0.045998	0.066833	0.072018	0.04018	47.9123	0.168607	1.59499
Aco013517	0	0	0	0	0	0	0	0	0	0.103654	0	7.39301	0	0.372028
Aco013520	4.5128	0	5.4682	3.83028	0.130003	0.714478	0.329873	0	0	378.464	1.53953	0.154645	0	1.87997
Aco013522	0	0	0	0	0	0	0	0	0	0	0	7.70851	0	0
Aco013621	8.16937	0	0	166.299	0	0.201128	0	0	0	0.493047	8.01317	0	0	0.350545
Aco013633	0	0	0.108036	0.25653	0.111607	0.113662	0	0.112972	0.037529	0	0.075219	16.3789	0.046699	0.603055
Aco013662	0.449533	0.475473	1.73329	0.506701	0.950222	1.6349	0.533998	1.26859	1.6653	0.891249	0.628873	326.447	1.81117	0.87395
Aco013693	0	0	0	0.353846	0	0	0	0	0	0	0	0	0	0
Aco013708	0.818323	0.342874	1.40678	0	1.60896	0.260998	0.222183	1.28787	1.97451	1.10722	0.588168	293.565	0.160628	20.7018
Aco013752	0	0	0	0	0	0	0.478022	0	0	99.1813	0	0.892587	6.40771	0
Aco013757	0	0	0	0	0	0	0	0	0	0	0	0	0.862259	0
Aco013764	0.501606	0	0	0	0	0	0	0	0	0	0	0	0	0
Aco013828	0.253025	0	0	0	0	0	0	0	0	0	0	0	0	0
Aco013906	0	0	0	0	0	0.083516	0.090815	0	0	0	0	7.1338	0	0.207268
Aco013923	1.0304	0	0	0	0	0	0	0	0	0	0	0	0	0
Aco013926	0	0	0	0	0	0	0	0	0	0.375179	0	0	0	0
Aco013928	0	0	0	0	0	0	0	0	0	0.491928	0	0	0	0
Aco013933	0	0	0	0	0	0	0	0	0	0.200582	0	0	0	0
Aco013941	0	0	0.507964	0	0.208577	0.322911	0	0.078128	0	0.949358	0	35.0382	0	0.119471
Aco013964	0.334014	0	0	0	0	0	0	0	0	0	0	0	0	0
Aco013978	0.056989	0.076099	0.502034	0.048968	0	0.062866	0.047257	0	1.10131	0.058311	0.043971	434.212	0	1.96749
Aco014010	0	0.004116	0	0	0	0	0	0	0	0	0	3.33508	0	0
Aco014013	0	0	0	0	0	0	0	0	0	1.95363	0	0	0	0
Aco014039	0	0	2.11542	0	0.935308	3.91067	0	0.917535	0	153.674	0.181865	0	5.40149	0
Aco014075	0	0	0	0	0	0.120156	0	0	0	0	0	0	0	0
Aco014076	0	0	0	0	0	0	0	0	0	0.398371	0	0	0	0
Aco014119	59.9476	0.441129	4.42777	1392.23	0.684313	0.201622	10.6911	0.192106	2.21	2.46204	63.0322	2.76524	0.438706	4.84962
Aco014120	0.644885	0	1.2424	0.579215	0.633496	0	0	1.03344	0.233537	0	0	287.829	0	15.7975
Aco014204	0.094665	0	0	0.065256	0	0.344716	0	0	0	0	0	95.0212	0	0.600187
Aco014255	0	0	0	0	1.16571	0	0	0	0	0	0	0	0	0
Aco014370	5.80188	3.3751	3.31371	0.88224	1.81078	0.757707	0.97231	4.8815	3.13896	1.19688	4.02033	532.163	0.312248	27.7618
Aco014415	0	0	0.098024	0	0	0	0.065387	0.068833	0	0	0	106.753	0	3.8912
Aco014452	1.34019	0.124148	0	26.5356	0	0	0	0	0.176003	0	1.57237	0	0	0
Aco014456	0.514802	0.601497	0.400834	0.783289	0.38315	0.710618	0.253124	0.859577	0.485292	0.646211	0.546679	74.9968	0.513672	0.788608
Aco014474	0	0	0	0	0	0	0	0	0	0.445451	0	0	0	0
Aco014479	0.040918	0	0	0	0	0.239165	0.259207	0	0	0.277455	0	7.68656	0	0
Aco014484	0	0	0	0	0	0	0	0	0	0.172779	0	0	0	0
Aco014522	0.607686	0	0	0.463351	0	0.18993	0.109185	0	0.1632	307.971	0.308849	0.146682	10.5793	0
Aco014526	0	0	0	0	0	0	0	0	0	0.979137	0	0	0	0
Aco014527	0	0	0.198287	0.111288	0	0.966147	2.83072	0	0	103.609	0.220004	0	0.585119	0
Aco014635	0	0.878284	0	0	0	0	0	0	0	0	0	0	0	0
Aco014682	28.6379	0	0.9966	544.327	0.474362	0.452386	1.77391	0	0	1.09385	29.3322	0.352274	0	0
Aco014712	0	0	0	0	0	0	0	0	0	0	0	0.737733	0	0
Aco014714	0	0	0.166559	0	0	0	0	0	0	0	0	0	0	1.72996
Aco014720	0	0	0	0	0	0.128057	0	0	0	0	0	5.88623	0	0.24054
Aco014724	0	0	0	0	0	0	0	0	0	0	0	0.416573	0	0
Aco014754	0	0	0	0	0	0	0	0	0	0.625982	0	0	0	0
Aco014757	0	0	0	0	0	0	0	0	0	2.14768	0	0	0	0
Aco014770	6.35034	4.0129	11.895	3.65349	5.831	38.5603	5.84336	8.41951	6.53084	15.9475	6.20766	1694.81	16.723	6.81773
Aco014785	0.367264	0.749047	0.074257	0	0.267313	0.503649	0	0.413455	0.468453	0.172236	0.088096	39.0519	0	1.44956
Aco014792	0	0	0	0	0	0	0	0	0	0	0	0.491792	0	0
Aco014867	0	0.691831	0.520115	0	0	28.0453	0	0	0	0	0	0	0	0
Aco014934	1.26646	0	0	0	0	0	0	0	0	0	0	0	0	0
Aco015036	0.241449	0	0	0	0	0	0	0	0	0	0	0	0	0
Aco015130	0	0	0	0.286075	0	0	0	0	0	0	0	0	0	0
Aco015144	0	0	0	0	0	0.14358	0	0	0	0	0	0	0	0
Aco015155	0	0	0	0	0	0	0	0	0	1.07401	0	0	0	0
Aco015159	0	0	0	0	0	0	0	0	0	0	0	0.197988	0	0
Aco015204	0	0	0	0.160336	0	0	0	0	0	0	0	0	0	0
Aco015277	0	0	0	0	0	0.293445	0	0	0	0	0	0	0	0
Aco015289	0	0	0	0	0	0	0	0	0	2.66306	0	0	0	0
Aco015370	0	0.123155	0	0	0	0	0	0	0	0	0	0	0	0
Aco015389	0	0.128497	0	0.072281	0	0.101371	0	0.045089	0.355908	10.9162	0	0	0.106595	0
Aco015402	0	0	0	0	0	0	0.140183	0	0	0	0	0	0	0
Aco015412	0	0	0	0	0.472612	0	0	0	0	0	0	0	0	0
Aco015424	0.222724	0	0	0	0	0	0	0	0	0	0	0	0	0
Aco015528	0	0	0	0	0	0.159933	0	0	0	0	0	4.08947	0	0
Aco015582	0	0.160834	0	0	0	0	0	0	0	0	0	0	0	0
Aco015589	0	0	0	0	0	0	0	0	0.200564	0	0	0	0	0
Aco015630	0	0	0	0	0	0	0	0	0	0	0	0.413769	0	0
Aco015639	0	0	0	0	0	0	0	0	0	0	0	0.497898	0	0
Aco015650	0	0	0	0	0	0.638695	0	0	0	0	0	0	0	0
Aco015652	0	0	0	0	0	0.670223	0	0	0	0	0	0	0	0
Aco015744	0	0	0	0	0	0	0	0	0	0	0	0.2874	0	0
Aco015747	0.016702	0	0	17.4503	0	0.853377	0	0	0	0.0587	0	0	0	0
Aco015770	0	0	0	0	0	0	0	0	0	1.65698	0	0	0	0
Aco015800	0	0	0	0	0	0	0	0.106316	0	0	0	0	0	0
Aco015826	0	0	0	0	0	0	0	0	0	0	0	1.07745	0	0
Aco015838	0	0	0	0	0	0	0	0	0	0	0	14.698	0	0
Aco015845	0	0	0	0	0	0.159864	0	0	0	0	0	4.66987	0	0
Aco015847	0	0	0	0	0	0	0	0	0	0	0	0.18202	0	0
Aco015915	0	0	0.311843	0	0	0	0	0	0	0	0	0	0	0
Aco015958	0	0	0	0	0	0	0	0	0	0	0	0.627665	0	0
Aco016022	0.217857	0	0.143061	32.4708	0.121151	0.259777	0.179401	0.159392	0	0.429345	0.52529	0.282777	0.475902	0.592868
Aco016052	0	0	0	0	0	0	0	0	0	0.128462	0	0	0	0
Aco016131	0	0	0	0	0	0.338095	0	0	0	0	0	0	0	0
Aco016152	0	0	0	0.119416	0	0	0	0	0	0	0	0	0	0
Aco016153	0	0	0	0.312986	0	0	0	0	0	0	0	0	0	0
Aco016155	0	0	0	0	0	0	0	0	0	0	0	0	0.371805	0
Aco016165	0	0	0	0.064534	0.133015	4.62147	0	0	0.142876	0.231204	0	155.71	0	10.1633
Aco016173	81.6321	1.39812	19.4417	2214.62	0.71138	3.49728	41.4549	0.597396	2.81901	2.06503	70.2866	6.05168	0.330998	27.4875
Aco016178	0	0	0	0	0	0	0	0	0	0.212584	0	0	0	0
Aco016222	0	0	0	0	0	0	0	0	0	0	0	0.273672	0	0
Aco016234	0	0	0	0	0	0	0	0	0	0	0	0.151796	0	0
Aco016287	0.099679	0	0	47.0076	0	0.104156	0	0.160442	0	0.072089	0.480475	0	0.074391	0
Aco016297	0.448577	0.115458	1.4613	0.310086	0.857929	1.28376	1.20478	2.17435	0.51388	0.456069	0.81762	150.813	0.297933	7.89838
Aco016303	0	0	0.267726	0	0	0	0	0	0	0	0	0	0	0
Aco016309	0	0	0	0	0	0	0	0.236578	0	0	0	0	0	0
Aco016370	0.298496	0	0	0.233109	0	0	0	0	0	36.7205	0	0	0	0
Aco016371	0	0	0	0.444519	0	0.258949	0	0	0	10.125	0	0	0	0
Aco016399	0	0	0	0	0	0.182311	0	0	0	0	0	0	0	0
Aco016479	0	0	0	0	0	0	0	0	0	29.177	0	0	0	0
Aco016497	0	0.119717	0	0	0	0	0	0	0	0	0	0	0	0
Aco016513	0	0	0	0	0	0	0	0	0.220502	0	0	0	0	0
Aco016516	0	0	0	0	0.058723	4.61762	0.06094	0.042718	0.478129	1.2797	0	283.087	0.413639	12.5809
Aco016561	0	0	0	0	0	0	0	0	0	0	0	0.365242	0	0
Aco016563	0	0	0	0	0	0.157746	0	0	0	0	0	0	0	0
Aco016581	0	0	0	0	0	0	0	0	0	4.08302	0	0	0	0
Aco016596	0.100187	0	0.179361	0	0	0	0	0	0	0	0	5.35832	0	0
Aco016619	0	0	0	0	0.076657	0	0	0	0	0	0	1.1184	0	0
Aco016620	0	0	0	0	0	0	0	0	0	0	0	5.4999	0	0
Aco016621	0	0	0	0	0	0	0	0	0	0	0	0.43573	0	0
Aco016622	0.323778	0	0	0	0.172687	0	0	0	0.239848	0	0.139839	12.4744	0	0
Aco016630	0	0	0	0	0	0	0	0	0	0	0	0.737515	0	0
Aco016631	0	0	0	0	0	0	0	0.23672	0	0	0	0	0	0
Aco016658	0.075651	0.706652	0.473739	0	0	0.892211	0	0	0.174912	0.637707	0	25.5799	0.189173	0
Aco016745	0	0.076539	0	0	0	0	0	0	0	0	0	2.41589	0	0
Aco016791	0	0	0	11.3249	0	0	0	0	0	0	0	0	0	0
Aco016793	0	0	0	0	0	0	0	0	0	0	0	0.559367	0	0
Aco016814	0	0.426267	0	0	0	0	0	0	0	0	0	0	0	0
Aco016842	0	0	0	0	0	0.211007	0	0	0.099885	38.8462	0	0.036771	3.69386	0
Aco016881	0	0	0	0	0	0	0	0	0	0.237168	0	3.22019	0	0
Aco016884	0.067337	0	0	36.5795	0	0.772711	0.872996	0	0	0.845805	0.254205	0	0	0
Aco016887	0	0	0	0	0	0	0	0	0	0	0	0	0.669746	0
Aco016933	0	0	0	0	0	0	0	0	0	0	0	0.22004	0	0
Aco017069	0	0	0.838281	0	0	0.445471	0	0	0.162536	0.044653	0.066047	220.028	0	2.43365
Aco017072	0	0	0	29.2363	0.036396	0.120198	0.262894	0.05699	0	0	0.172083	0.857341	0	0
Aco017119	0	0	0	0	0	0.313372	0	0	0	0	0	0	0	0
Aco017124	0	0	0	0	0	0	0	0	0	2.16535	0	0	0	0
Aco017129	0	0	0	0	0.040295	0.135921	0.038353	0.026163	0	0.034845	0	39.0388	0	0.852711
Aco017155	0	0	0	0	0	0	0	0	0	0	0	0.517977	0	0
Aco017217	0	0	0	0	0.175173	0	0	0	0	0	0	0	0	0
Aco017328	0	0	0	0	0	0	0.060031	0	0.060443	0	0	10.0799	0	0.256586
Aco017335	12.9552	0	0.32939	304.034	0.132867	0	0.601306	0	0.137707	0.584836	10.0136	0.798434	0	0.388291
Aco017399	0	0	0.166559	0	0	0	0	0	0	0	0	0	0	1.72996
Aco017406	0	0	0	0.989732	0	0	0	0	0	0	0	0	0	0
Aco017446	0.535941	0.100682	0.514125	0.046708	0.138411	0.080601	0.199044	0.53293	0.28777	0	0.370078	103.822	0	3.83281
Aco017486	0	0	0	0	0.195887	0	0	0	0	0	0	0	0	0
Aco017489	2.96306	0.096565	0.625445	0.503138	2.76308	0.454762	0.112766	1.61891	0.970764	0.558865	0.51939	619.959	0	46.6949
Aco017492	0	0	1.23786	0.095168	0	0.088756	0	0	0	0	0	1432.34	0.208045	152.184
Aco017539	0	0	0	0	0	0.468493	0	0	0	0	0	0	0	0
Aco017577	0	0	0.161848	0	0	14.4272	0	0	0	0	0	0	0	0.205955
Aco017585	0	0	0	0	0	0	0	0	0	0	0.248189	0	0	0
Aco017621	0	0	0	0	0	0	0	0	0	0.57132	0	0	0	0
Aco017662	0.090477	0	0.59513	0	0.097241	1.96623	0.272349	0.72651	0.08142	0.159651	0	87.4862	0	0.774665
Aco017668	0.338238	0	0	0	0	0	0	0	0	0	0	0	0	0
Aco017703	0	0	0	0.445896	0	0.016054	0	0	0	0	0	0	0	0
Aco017730	0.204594	0.713082	0.156451	0.475113	0	0.801308	0	0.158044	0.173827	27.2199	0.140665	0	0.329839	0
Aco017754	0	0	0	0	0	0	0	0.160014	0	0	0	0	0	0
Aco017796	0	0	0	0	0	0	0	0	0	0	0	0.209206	0	0
Aco017800	4.97303	0.963032	5.01046	0	2.2068	0.847232	0.424479	4.50562	4.56011	0.868546	3.24882	742.096	0	55.7112
Aco017835	0	0	0	0	0	0.182237	0	0	0	0	0	0	0	0
Aco017853	0	0	0	0	0	0	0	0	0	0	0	0.480042	0	0
Aco017956	0	0	0.161903	0	0	0	0	0	0	0	0	0	0	0
Aco017961	0	0	0	0	0	0	0	0.156285	0	0	0	0	0	0
Aco017966	0	0	0	0.158719	0	0	0	0	0	0	0	0	0	0
Aco018017	0	0	0	0	0	0	0	0	0	0	0	0	0	0.27615
Aco018041	0	0	0	0	0.1089	0	0	0	0	0.253801	0	4.36956	0	0.097663
Aco018042	0.074809	0	0	0	0.167105	0	0	0.053859	0	0.05136	0	22.3711	0	1.00988
Aco018052	0.089011	0	0.785256	0	0	0	0	0	0	14.9882	0.384797	0	0	0
Aco018094	0	0	0	0	0	0.220115	0	0	0	0	0	0	0	0
Aco018211	0	0	0	0.148046	0	0	0	0	0	0	0	0	0	0
Aco018252	0.020343	0	0	0	0	0	0	0	0	0	0.316872	0	0	0
Aco018271	0	0	0	0	0	0	0	0	0	0.412857	0	0	0	0
Aco018291	1.14301	0	0	0	0	0	0	0	0	0	0	0	0	0
Aco018295	0.169378	0	0	0	0	0	0	0	0	0	0	0	0	0
Aco018365	0	0.212637	0	0	0	0	0	0	0	0	0	0	0	0
Aco018367	0	0	0	0	0	0	0	0	0	0	0	1.02611	0	0
Aco018382	0	0	0.25978	0	0	0	0	0	0	0	0	0	0	0
Aco018442	3.65895	0.487787	0.467555	181.685	0.324624	1.53094	0.818503	1.03798	0.16931	9.0328	5.37063	0	0	0
Aco018560	0	0.395022	0	0	0	0	0	0	0	0	0	0	0	0
Aco018603	0	0	0	0	0	0	0	0	0	0	0	0.63559	0	0
Aco018616	0	0	0	0	0	0	0	0	0	0	0	1.31019	0	0
Aco018617	0	0	0	0	0	0	0	0.125085	0	0	0	5.15172	0	0.39885
Aco018621	0	0	0	0.401795	0	0	0	0	0	0	0	0	0	0
Aco018622	0	0	0	0.112451	0	0	0	0	0	0	0	0	0	0
Aco018671	10.3489	2.04169	1.10713	287.312	1.8812	0.557331	3.7808	2.34551	5.40039	1.31574	1.1182	2.2625	0	2.0928
Aco018709	0	0	0	0.144456	0	0	0	0	0	0	0	0	0	0
Aco018713	0	0	0.205741	0	0	0	0	0	0	0	0	0	0	0
Aco018722	0	0	0	0	0	0	0	0	0	0	0	0.230237	0	0
Aco018733	0.277418	0.821273	0	0.336203	0	1864.15	0	0	0	0	0.2585	0	0	4.01818
Aco018737	0	0	0.27843	0	0	415.75	0	0	0	0	0	0	0	0.797048
Aco018741	0	0	0.548645	0	0.303911	91.6595	0.617901	0	0.337524	0	0	0	0	8.80542
Aco018745	0	0	0	0	0.214956	290.4	0	0.299358	0	0	0	0	0	3.02643
Aco018752	0	0	0	0	0	61.8648	0	0	0	0	0	0	0	0
Aco018757	1.20535	0	0	0	0	0	0	0	0	0	0	0	0	0
Aco018838	0	0	1.16256	0	0	82.0446	0	0.581659	0.292782	0	0	2.01079	0	4.65188
Aco018914	0	0	0	0	0	0	0	0.107631	0	0	0	0	0	0
Aco018930	0	0	0	0	0	0	0	0	0	0	0	1.72237	0	0
Aco018957	0	0	0	0	0	0	0	0	0	0	0	0.263508	0	0
Aco018984	0	0	0	0	0	0	0	0	0	0	0	0	0.128858	0
Aco019125	0	0	0	0	0	0	0	0	0	0	0	0.145959	0	0
Aco019151	0	0	0	0	0	0	0	0	0	0	0.554398	0	0	0
Aco019154	0	0	0	0	0	0	0.143174	0	0	0	0	0	0	0
Aco019186	0	0	0	0	0	0	0	0	0	0	0.305749	0	0	0
Aco019189	0	0	0	0	0	0	0	3.55728	0	0	0	0	0	0
Aco019205	0	0	0	0	0	0	0	0	0	0	0.213061	0	0	0
Aco019212	0	0	0	0	0	0	0	0.220879	0	0	0	0	0	0
Aco019213	0	0	0	0	0	0	0	0	0	0	0	0.324835	0	0
Aco019217	1.53851	0	0	964.723	0	0	0	0.242293	0	0	0.299553	0	0.968129	0
Aco019219	4.19072	0	0	233.838	0	0	0	0	0	0.622035	0	0	0.929067	0
Aco019238	0	0	0	0	0	0	0	0	0	0	0	0	0	0.472525
Aco019299	0.170076	0	2.48787	0	0	10.3432	0	0	1.16183	30.5195	0.1597	577.812	0	0.467292
Aco019343	0.249129	0	0	0	0	0	0	0	0	0	0	0	0	0
Aco019515	0.00685	0	0	0	0	0	0	0.193615	0	0	0	0	0	0
Aco019525	0	0	0	11.9797	0.200011	0	0.427232	0	0	0	0	0.375834	0.109913	0.220066
Aco019555	0	0	0	0	0	2.15624	0	0	0	0	0	0	0	0
Aco019614	0	0	0	0	0	0	0	0	0	0	0	0	61.6852	0
Aco019615	0	0	0	0	0	0	0	0	0	0.719883	0	0	155.63	0
Aco019618	0	0	0	0	0	0	0	0	0	0	0	0.461421	0	0
Aco019643	0.575065	0	0	0	0	0	0	0	0	0	0	0	0	0
Aco019705	0	0	0.55586	0	0	0	0	0	0	0	0	0	0	0
Aco019709	0	0	0.161767	0	0	0	0	0	0	0	0	0	0	0
Aco019716	0	0	0	0.290761	0	0	0	0	0	0	0	0	0	0
Aco019722	0	0.204425	0.154526	0	0.640571	0	0.753641	0	0.689076	0	0	18.8755	0	0
Aco019723	0	0	0	0	0	0	0	0	0	0	0	0.230109	0	0
Aco019759	0	0	0	0.116649	0	0	0	0	0	0	0	0	0	0
Aco019837	0.10935	0	0	0	0	0	0	0	0	0	0	0	0	0
Aco019872	0	0	0	0	0	0	0	0	0	0	0	0	0	0.204553
Aco019891	0.434679	0	0	0	0	0	0	0	0	0	0	0	0	0
Aco019957	0	0	0	0	0	0	0	0	0	0	0	3.31604	0	0
Aco019966	0.801928	0	0	0	0	0	0	0	0	0	0	0	0	0
Aco019988	0.309187	0	0	0	0	0	0	0	0	0	0	0	0	0
Aco019992	0	0	0	0	0	0	0	0	0	0	0.112734	0	0	0
Aco020007	0	0	0	0.117608	0	0	0	0	0	0	0	0	0	0
Aco020032	0	0	0	0	0	0	0	0	0	0	0	0	0.100538	0
Aco020041	0	0	0	0	0	0	0	0	0	0	0	0.348397	0	0
Aco020076	0	0	0	0	0	0	0	0	0	0	0	0	0.196818	0
Aco020143	0	0	0	0	0.068695	0.079192	0	0	0	0	0	3.17057	0	0.204607
Aco020207	0	0	0	0	0	0	0	0	0.045396	1.51894	0	0	0.059958	0
Aco020211	0	0	0	10.4912	0	0	0	0	0	0	0	0	0	0
Aco020232	0	0	0	0	0	0.509577	0.019293	0	0	0	0	0	0	0
Aco020233	0	0	0	0.519585	0	0	0	0	0	0	0	0	0	0
Aco020275	0.139215	0	0	0	0	0	0	0	0	0	0	0	0	0
Aco020315	0	0	0	0	0	0	0	0	0	0	0	1.00927	0	0
Aco020387	0	0	0	0	0	0	0	0	0	0	0.351179	0	0	0
Aco020388	0	0	0	0	0	0	0	0	0	13.4861	0	0	0	0
Aco020402	0	0	0	0.218351	0	0	0	0	0	0	0	0	0	0
Aco020408	0.127371	0.13619	0.919974	0.094729	0.23897	138.649	0.140156	0.351754	1.43166	0.058491	1.14384	1.18386	0	0.222818
Aco020418	0	0	0	0	0	0	0	0.209626	0	0	0	0	0	0
Aco020438	0	0	0	0	0	0	0	0	0	0	0	1.37386	0	0
Aco020476	0.23433	0	0	0	0	0	0	0	0	0	0	0	0	0
Aco020485	0	0	0	0	0	0	0	0	1.15241	0	0	0	0	0
Aco020494	0	0	0	0	0	0	0	0	0	0	0.142878	0	0	0
Aco020509	0	0	0	0	0	0	0	0	0	0.136368	0	2.23629	0	0
Aco020511	0	0	0	0	0	0	0	0	0	0	0	1.02552	0	0
Aco020525	0	0	0	0	0	0	0	0.297184	0	0	0	0	0	0
Aco020544	0	0	0	0	0	0	0	0.052737	0	0.061641	0	3.95172	0	0.154336
Aco020546	0	0	0	0	0	0	0	0	0	0	0	0.278402	0	0
Aco020605	0.237131	0	0	0	0	0	0	0	0	0	0	0	0	0
Aco020642	0	0	0	0	0	0	0	0	0	0.155828	0	0	0	0
Aco020672	0	0	0	0	0	0.351912	0	0	0	0	0	0	0	0
Aco020673	0	0	0	0	0	0	0.254211	0	0	0	0	0	0	0
Aco020678	0	0	0	0	0	0	0	0	0	0.323573	0	0	0	0
Aco020685	3.04881	0	0.406067	1.40588	0.332762	66.4752	0	2.63416	0	0	0	0	0	0
Aco020714	0.091926	0.126819	0.15936	0	0.268449	0	0	0.234343	0.238452	0	0.072445	14.6477	0	0.139177
Aco020742	0.785739	0	0	0	0	0	0	0	0	0	0	0	0	0
Aco020767	0	0	0	0	0	0	0	0	0	0	0	0	1.82622	0
Aco020775	0	0	0	0	0	0	0	0	0	0.439737	0	0	0	0
Aco020901	0	0	0	0	0	0	0	1.78414	0	0	0	0	0	0
Aco020913	0	0	0	0.389178	0	0	0	0	0	0	0	0	0	0
Aco020968	1.5324	0	0	0.02902	0	0	0	0	0	0	0	0.15576	0	0
Aco020986	0	0	0	0	0	0	0	0	0	0	0	0	0	0.344014
Aco020987	0	0	0	0.518117	0	0	0	0	0	0	0	0	0	0
Aco021034	0	0	0	0.14571	0	0	0	0	0	0	0	0	0	0
Aco021035	0	0	0	0	0	0	0	0	0	0	0	1.44839	0	0
Aco021037	0	0	0	0	0	0	0	0	0	0.107501	0	0	0	0
Aco021066	0	0	0	0	0	0	0	0	0	0	0	0.429785	0	0
Aco021141	0	0	0	0	0	0	0	0	0.22189	0	0	0	0	0
Aco021169	0	0	0	0	0	0	0	0	0.343891	0	0	0	0	0
Aco021175	0.123638	0	0	0	0	0	0	0	0	0	0	0	0	0
Aco021201	0	0	0	0.570461	0	0	0	0	0	0	0	0	0	0
Aco021222	0	0	0	0	0	0	0	0	0	0	0.735183	0	0	0
Aco021232	0	0	0	0.109817	0	0.091888	0	0	0	130.315	0.102768	0	0	0
Aco021283	0	0	0	0	0	1.00656	0	0	0	0	0	0	0	0
Aco021324	0	0	0	0	0	0	0	0	0	0	0.238616	0	0	0
Aco021336	0	0	0	0	0	0	0	0	0	0	8.56469	0	0	0
Aco021386	0	0	0	0.327341	0	0	0	0	0	0	0	0	0	0
Aco021469	0	0	0	0.123517	0	0	0	0	0	0	0	0	0	0
Aco021537	0	0	0	0	0	0	0	0.139733	0	0	0	0	0	0
Aco021547	0	0	0	0	0	0	0	0	0	0	0	0.164149	0	0
Aco021565	0.173893	0	0	0	0	0	0	0	0	0	0	0	0	0
Aco021573	0	0	0	3.17936	0	0	0	0	0	0	0	0	0	0
Aco021585	0	0	0	0	0	0	0	0	0.162751	0	0	0	0	0
Aco021642	0	0	0.359519	0	0	0	0	0	0	0	0	0	0	0
Aco021707	0	0	0	0	0	0	0	0	0	0.109729	0	0	0	0
Aco021723	0	0	0	0.299476	0	0	0	0	0	0	0	0	0	0
Aco021725	0	0	0	0	0	0	0	0	0	0	0	0.228978	0	0
Aco021779	0	0	0	0	0	0	0	0	0	0	0	3.54501	0	0.332756
Aco021818	0	0	0	0	0	0	0	0	0	1.2236	0	0	0	0
Aco021820	0	0	0	0	0	0	0	0	0	0.147679	0	0	0	0
Aco021822	0	0	0	0.618927	0	0	0	0	0	0	0	0	0	0
Aco021828	0	0	0	0	0	0	0	0	0	0.313349	0	0	0	0
Aco021843	0.816607	0	0	0	0	0	0	0	0	0	0	0	0	0
Aco021855	0	0	0.642565	0	0	0	0	0	0	0	0	0	0	0
Aco021856	0	0	0	0	0	0	0	0.377951	0	0	0	0	0	0
Aco021941	0.261986	0.782434	0.324264	0	0.153578	1.32597	0.951196	0.825161	0.093666	0	0	111.004	0.499887	7.00305
Aco021946	0.756814	0.298389	0	112.359	0.229326	0	0	0.243311	0.208287	0.222313	1.4527	0.384209	0	0
Aco021963	0	0	0	0	0	0	0	0.157604	0	0	0	0	0	0
Aco021966	1.22003	1.18029	1.34342	1.78658	1.04375	1.21904	0.204571	1.27874	0.982513	2.12318	1.21187	172.593	0.622851	1.51976
Aco021984	0	0	0	0	0	0	0	0	0	2.1567	0	0	0	0
Aco021988	0	0	0	0	0	0	0	0	0	0	0	1.90145	0	0
Aco022012	0.183029	0.236703	0.088219	0	0.111312	0	0	0.157704	0.209895	10.7582	0.166437	0	0.115598	0
Aco022060	0.178122	0	0	0	0	0	0	0	0	0	0	0	0	0
Aco022071	0	0	0	0	0	0	0	0	0	0.348118	0	0	0	0
Aco022193	0	0	0	0	0	0	0	0	0	0	0	0.342354	0	0
Aco022210	0	0	0	0	0	3.69922	0	0	0	0	0	0	0	0
Aco022227	0	0	0	0	0	0	0	0	0	0	0	1.66128	0	0
Aco022228	2.31033	0	0	0	0	0	0	0	0	0	0.141631	0	0	0
Aco022245	0	0	0	0	0	0	0	0	0	0	0	0.602072	0	0
Aco022258	0	0	0	0	0	0	0	0	0	0	0.188804	0	0	0
Aco022261	0	0	0	0	0	0	0.539221	0	0	0	0	0	0	0
Aco022289	5.05062	0	1.02165	256.405	0.446213	0.396395	0.675594	0	0.574669	1.30938	11.1515	0	0	0.965877
Aco022351	0	0	0	0	0.418372	0	0	0	0	0	0	0	0	0
Aco022355	0	0	0	0	0	0	0	0	0	0	0	0	0.168484	0
Aco022363	0	0	0	0	0	0	0	0	0	0	0.137864	0	0	0
Aco022370	0	0	0	0	0	0	0	0	0	0	0	0.363236	0	0
Aco022418	0.173003	0	0	0	0	0	0	0	0	0	0	0	0	0
Aco022463	0	0	0	0.956068	0	0	0	0	0	0	0	0	0	0
Aco022468	0	0	0	0	0	0	0	0	0	0	0	0.346281	0	0
Aco022501	0	3.46236	0	0	0	0	0	0	0	0	0	0	0	0
Aco022515	0	0	0	0	0	0	0	0	0	0	0	0.195654	0	0
Aco022550	0	0	0	0	0	0	0	0	0	0.664623	0	0	0	0
Aco022557	0	0	0	0	0	0	0	0	0	0	0.861424	0	0	0
Aco022604	0	0	0	0	0	0	0	0	0	0	0	0	0.171345	0
Aco022637	0	0	0	0	0	0	0	0	5.26775	0	0	0	0	0
Aco022638	0	0	0	0	0.16853	0	0	0	0	0	0	0	0	0
Aco022674	0	0	0	0.142116	0	0	0	0	0	0	0	0	0	0
Aco022744	0	0	0	0	0.153105	0	0	0	0	0	0	0	0	0
Aco022757	1.83213	0	0	0	0	0	0	0	0	0	0	0	0	0
Aco022783	0	0	0	0	0	0	0	0	0	0	0	0	12.6757	0
Aco022823	0	0	0	0.123184	0	0	0	0	0	0	0	0	0	0
Aco022827	0.311057	0	0	0	0	0	0	0	0	0	0	0	0	0
Aco022892	0	0	0	0	0	1.23292	0	0	0	0	0	0	0	0
Aco022930	0.574811	0	0	0	0	0	0	0	0	0	0	0	0	0
Aco022941	5.044	5.34219	14.4096	3.07905	9.38158	8.0216	1.99849	17.3658	4.93846	14.7981	4.72651	2018.72	6.55875	160.485
Aco022960	0	0	0	0	0	0	0	0	0.43118	0	0	0	0	0
Aco023031	0	0	0	0	0	0	0	0.198481	0	0	0	0	0	0
Aco023039	0	0	0	0	0	0.158143	0	0	0	0	0	0	0	0
Aco023058	0	0	0.136082	0	0	0	0	0	0	0	0	0	0	0
Aco023093	0.347674	0	0.927687	0	0	0	0	0	0	57.1437	0.355563	0	0	0
Aco023094	1.16267	0	0.946354	0.164849	0	0	0	0.189627	0.064364	118.958	0.71607	0	0.237445	0
Aco023110	0	0	0.222883	0	0	0	0	0	0	0	0	0	0	0
Aco023116	0	0	0.5331	0	0	0	0	0	0	0	0	0	0	0
Aco023207	0.189186	0	0	0	0	0	0	0	0	0	0	0	0	0
Aco023235	0	0	0	0	0	0	0	0	0.483091	0	0	0	0	0
Aco023238	0	0	0	0	0	0	0	0	0	0	0	0.238532	0	0
Aco023239	0.100855	0	0	0	0	0	0	0	0	0	0	0	0	0
Aco023257	0	0	0	0.530219	0	0	0	0	0	0	0	0	0	0
Aco023340	0	0	0	0	0	0	0	0	0.272085	0	0	0	0	0
Aco023360	0	0	0	0	0	3.11939	0	0	0	0	0	0	0	0
Aco023419	0	0	0	0	0	0.611278	0.450363	0	0	0	0.355876	39.6269	0	2.19173
Aco023519	0	0	0	0	0	0	0	0	0	0	0	1.25315	0	0
Aco023522	0	0	0	0	0	0	0	0	0	1.86011	0	0	0	0
Aco023571	0	0	0	0	0	0	0	0	0	0.507418	0	0	0	0
Aco023619	0	0	0	0	0.09236	0.065917	0	0	0	0	0	2.10787	0	0
Aco023637	0	0	0	0	0	0	0	0	0	0	0	0.221238	0	0
Aco023666	0.134285	0	0	0	0	0	0	0	0	0	0	0	0	0
Aco023741	0	0	0.238907	0	0	0	0	0	0	0	0	0	0	0
Aco023800	0	0	0.309884	0.03092	0.118705	0.214974	0	0	0.053759	0.245493	0.067874	14.9092	0.171691	0
Aco023811	0	0	0	0	0	0.305705	0	0	0	9.73862	0	0.255684	0	0
Aco023814	0	0	0	0	0	0	0	0.022652	0	0	0.015975	0.930918	0	0
Aco023815	0.922887	0.746639	1.24781	0.338248	0.625782	0.249145	0	1.06516	1.44696	0.101956	0	157.984	0	7.65861
Aco023841	0	0	0	0	0	0	0	0	0	0	0	1.85546	0	0
Aco023874	0	0	0	0	0	0.491488	0	0	0	0	0	0	0	0
Aco023878	0	0	0	0	0	0	0.569677	0	0	0	0	0	0	0
Aco023892	0	0.914297	0	0	0	0	0	0	0	0	0	0	0	0
Aco023922	0	0	0	0	0	0	0	0	0	0	0	0	0.458388	0
Aco023935	1.25998	0	0	10.8942	0	0	0	0	0	0	0	0	0	0
Aco023956	0	0	0	0	0.118924	0	0	0	0	0	0	0	0	0
Aco023961	0	0	0	0	0	0	0	0	0	0	0	0	0	1.09532
Aco023963	0	0	0	0	0	0	0	0.350218	0	0	0	0	0	0
Aco024004	0.269008	0	0	0	0	0	0	0	0	0	0	0	0	0
Aco024022	0	0	0	0	0	0	0	0	0	0.136792	0	0	0	0
Aco024079	0	0	0	0	0.223356	0	0	0	0	0	0	0	0	0
Aco024080	0	0.140267	0	0	0	0	0	0	0	0	0	0	0	0
Aco024122	0	0	0	0	0	0	0	0	0.108381	0	0	0	0	0
Aco024192	0	0	0	0	0	2.17287	0	0	0	0	0	0	0	0
Aco024200	0	0	0.345239	0	0	93.4862	0.259566	0.07388	0.26601	3.2044	0	0	0	0
Aco024241	0	0	0	0	0	0	0	0	0	0.811033	0	0	0	0
Aco024297	0.654128	0.084675	0.716969	0.442093	0.642606	0.161095	0.059656	1.31546	0.70189	0.621317	0.254656	131.695	0	4.97884
Aco024366	0.208773	0	0	0	0	0	0	0	0	0	0	0	0	0
Aco024428	0	0	0	0	0	0	0	0	0.221892	0	0	0	0	0
Aco024433	0	0	0	0	0	0	0	0	0	0	0	0.390289	0	0
Aco024441	0.160906	0	0	0	0	0	0	0	0	0	0	0	0	0
Aco024460	0.181811	0	0	0	0	0	0	0	0	0	0	0	0	0
Aco024471	0	0	0	4.52193	0	0.20913	0	0	0.166355	0.196283	0	0	0	0
Aco024502	0	0	0	0	0	0	0.186811	0	0	0	0	0	0	0
Aco024507	2.09862	0	0	84.3549	0	0	1.36454	0	0	0	2.01739	0	0	0
Aco024518	0	0	0	0	0	1.5879	0	0	0	0	0	0	0	0
Aco024522	0	0	0	0	0	0.114997	0	0	0	0	0	0	0	0
Aco024568	0	0	0	2.31047	0	0	0	0	0	0	0	0	0	0
Aco024570	0	0	0	1.56442	0	0	0	0	0	0	0	0	0	0
Aco024586	0.70852	0	0	0	0	0	0	0	0	0	0	0	0	0
Aco024616	0	0	0.108115	0	0	0	0	0	0	0	0	0	0	0
Aco024629	0	0	0	0.528243	0	0	0	0	0	0	0	0	0	0
Aco024631	1.87626	0	0.138856	94.4426	0	0.255771	0	0.185973	0	0.132867	2.64955	0	0	0.406933
Aco024649	0	0	0	0	0	0	0	0	0	0	0	0.808901	0	0
Aco024695	0	0.448579	0	0	0	0	0	0	0	0	0	0	0	0
Aco024741	0	0	0	0	0	11.2997	0	0	0	0	0	0	0	0
Aco024754	0	0	0	0	0	0	0	0	0	0	0	0.132924	0	0
Aco024826	0	0	0	0	1.20933	0	0	0	0	0	0	0	0	0
Aco024838	0	0	0	0.349862	0	0	0	0	0	0	0	0	0	0
Aco024843	0	0	0	0	0	0	0	0	42.3017	0	0	0	0	0
Aco024851	0	0	0	0	1.19296	0	0	0	0	0	0	0	0	0
Aco024883	0	0	0	0	0	0	0	0	0	0.113773	0	0	0	0
Aco024890	0	0	0	0	0	0.981969	0	0	0	0	0	0	0	0
Aco024905	0	0	0	0	0	0	0	0	0.194315	0	0	0	0	0
Aco024947	0	0	0	0	0	0	0	0.166911	0	0	0	0	0	0
Aco024960	0.414245	0	0	0	0	0	0	0	0	0	0	0	0	0
Aco024976	0	0	0	0	0	0	0	0	0	0	0	0	0.390844	0
Aco024977	0.132351	0	0	0	0	0	0	0	0	0	0	0	0	0
Aco025055	0	0	0	0	0	0	0	0	0	0.124675	0	0	0	0
Aco025070	0	0	0	0	0	0	0	0	0	0.233264	0	2.55118	0	0.051281
Aco025134	0	0	0	0	0	0	0	0	0.161074	0	0	0	0	0
Aco025146	0	0	0.167045	0	0	0	0	0	0	0	0	0	0	0
Aco025150	1.14824	0.162076	0.248971	0.911354	0	0	1.40126	0	0.266978	102.919	0.59441	0	0.478108	0.263957
Aco025162	0	0	0	0	0.131053	0	0	0	0	0	0	0	0	0
Aco025188	0.095274	0	0	0	0	1.2265	0	0	0.086156	18.4574	0	0	0	0
Aco025213	0	0	0	0.106022	0	0	0	0	0	0	0	0	0	0
Aco025246	0	0	0	0.859507	0	0	0	0	0	0	0	0	0	0
Aco025278	0	0	0	0	0	0	0	0.395137	0	0	0	0	0	0
Aco025370	0.171412	0	0	0	0	0	0	0	0	0	0	0	0	0
Aco025466	0	0	0	0	0	0	0	0	0	0.869121	0	0	0	0
Aco025555	0	0	0	0	0	0	0	0	0.248802	0	0	0	0	0
Aco025594	0	0	0	0	0	5.31666	0	0.499239	0	0	0	0	0	0
Aco025621	0	0	0.031413	0	0	0	0	0.247419	0	0	0	0	0	0
Aco025638	0	0	0	0.247703	0	0	0	0	0	0	0	0	0	0
Aco025641	0	0	0	2.21506	0	0	0	0	0	0	0	0	0	0
Aco025661	0	0	0	0	0	0	0	0	0	0	0.67728	0	0	0
Aco025670	0	0	0	0	0	0	0	0	0	0	0.195451	0	0	0
Aco025724	0.076325	0	0	0	0	0	0	0	0	0.086258	0	4.05311	0	0
Aco025839	0	0	0	0	0	1.26843	0	0	0	0	0	0	0	0
Aco025878	1.83756	0.942733	2.84989	0	1.57519	0.681468	0.293187	5.43217	1.085	0.884579	1.41348	591.285	0	35.1949
Aco025908	0	0	0	0	0	0	0	0	0	0	0.255437	0	0	0
Aco025916	6.16761	0	0	0	0	0	0	0	0	0	0.182678	0	0	0
Aco025924	0	0	0	0	0	0	0	0	0	0	0	0.707335	0	0
Aco025939	0	0	0	0	0	0	0	0	0	0	0	0	0.914853	0
Aco025940	0	0	0	0	0	0	0	0	0	0	0	0	2.60697	0
Aco025941	0	0	0	0	0	0	0	0	0	0	0	0	0.341768	0
Aco025942	0	0	0	0	0	0	0	0	0	0.349671	0	0	0	0
Aco026001	0	0	0	0	0	0	0	0	0	0	0	44.8052	0	0
Aco026009	0	0	0	0	0.354986	0	0	0	0	0	0	0	0	0
Aco026016	0.051297	0	0.297271	0	0	0.375939	0	0	0	0	0	35.2093	0	0
Aco026059	0	0	0	0	0	0	0	0.487919	0	0	0	0	0	0
Aco026104	0	0	0	0	0	0	0	0	0	0.114679	0	0	0	0
Aco026161	0	0	0	0	0	0	0	0	0	0	0.52737	0	0	0
Aco026175	0	0	0	0	0	0	0	0	0	0	0	0.145067	0	0
Aco026251	0.12259	0	0	0	0	0	0	0	0	0	0	0	0	0
Aco026269	0	0	0	0	0	1.55648	0	0	0	0	0	0	0	0
Aco026294	0	0	0.260332	0	0	0	0	0	0	0	0	0	0	0
Aco026312	0	0	0	0.209343	0	0	0	0	0	0	0	0	0	0
Aco026355	0	0	0	0	0	0	0	0	0	0	0	2.36037	0	0
Aco026374	0	0.196948	1.1412	0	0.239678	0.131314	0	2.10449	0.701357	0.223721	0.589257	457.285	0	21.8379
Aco026400	0	0	0	0	0	0	0	0	6.84222	0	0	0	0	0
Aco026410	0	0	0	0.202581	0	0	0	0	0	0	0	0	0	0
Aco026441	0	0.19193	0	0	0	0	0	0	0	0	0	0	0	0
Aco026457	0	0	0	0	0	0	0	0	0.21553	0	0	0	0	0
Aco026506	0.098246	0	0	12.2623	0	0	0	0	0	0	0.19011	0	0	0
Aco026507	0.114609	0.256277	0.045945	6.02609	0.048632	0	0	0.109583	0.073909	0	0.112435	0	0	0
Aco026539	0	0	0	0.227879	0	0	0	0	0	0	0	0	0	0
Aco026546	0	0	0	0	0	0	0	0	0	0.49464	0	0	0	0
Aco026553	0	0	0	0	0	0	0	0.2588	0	0	0	0	0	0
Aco026564	0.256371	0	0	0	0	0	0	0	0	0	0	0	0	0
Aco026568	0	0	0.136504	0	0	0	0	0	0	0	0	5.83747	0	0
Aco026571	8.13274	0.135679	10.5601	6.85888	0.244326	2.08915	0	0.135072	0.109239	834.851	2.63301	0.165266	0	1.76845
Aco026573	0	0	0	0	0	0	0	0	0	0	0	44.5362	0	0
Aco026579	0.530383	0.866604	2.76626	0.271257	0.764157	0.86306	0	1.76171	1.92098	7.73297	0.169498	1995.29	1.28305	91.1632
Aco026597	0	0	0	0	0	0	0.38046	0	0	0	0	0	0	0
Aco026622	0	0	0	0	0	0	0	0	0	0.201224	0	0	0	0
Aco026628	0.107342	0	0	0	0	0	0	0	0	0	0	0	0	0
Aco026686	0	0	0	0	0	0	0	0	0	0	0.516336	0	0	0
Aco026709	0	0	0	0	0	0.213389	0	0	0	0	0	0	0	0
Aco026732	0	0	0	0.209852	0	0	0	0	0	0	0	0	0	0
Aco026747	0	0	0	0	0	0	0.564412	0	0	0	0	0	0	0
Aco026805	0	0	0	0	0	0	0	0	0	0	0	0.309423	0	0
Aco026833	0	0	0	0	0	0	0	0	0	0.616999	0	0	0	0
Aco026834	0	0.802934	0	0	0	0	0	0	0	0	0	0	0	0
Aco026839	0	0	0	0	0	0	0	0	0	0	1.10675	0	0	0
Aco026840	4.08123	0	0	34.5456	0	0	0	0	0	0	0	0	0	0
Aco026849	0	0	0	0	0	0	0	0	0	0.683479	0	0	0	0
Aco026879	0	0.203068	0	0	0	0	0	0	0	0	0	0	0	0
Aco026927	0	0	0	0	0	0	0	0	0	0.483468	0	0	0	0
Aco026929	0	0	0	0	0.507571	0	0	0	0	0	0	0	0	0
Aco026935	0	0	0	0	0.391936	0	0	0	0	0	0	0	0	0
Aco026939	0	0	0	0	0	0	0	0.100681	0	0	0	0	0	0
Aco026940	0	0.314376	0	0	0	0	0	0	0	0	0	0	0	0
Aco026961	0	0	0	0	0	0	0	0	0	2.37675	0	0	0	0
Aco026990	0	0	0	0	0	0	0	0	0	0	0.407277	0	0	0
Aco027038	0	0	0	0	0	0	0	0	0	0	0	0.619678	0	0
Aco027081	0	0	0	0	0	0	0	0	0	0.376139	0	0	0	0
Aco027082	0	0	0	0	0	0	0	0.100854	0	0	0	0	0	0
Aco027116	0	0	0	0	0.245759	0	0	0	0	0	0	0	0	0
Aco027129	0	0	0	0	0	0	0	0	0	0	0.150576	0	0	0
Aco027183	0	0	0	0	0	0	0	0	0	0.204133	0	0	0	0
Aco027213	0	0	0	0	0	0	0	0.107084	0	0	0	0	0	0
Aco027249	0	0	0	0.125034	0	0	0	0	0	0	0	0	0	0
Aco027296	0	0	0	0	0	0.334474	0	0	0	0	0	0	0	0
Aco027327	0	0	0.103171	0	0	0	0	0	0	0	0	0	0	0
Aco027336	0	0	0.197813	0	0	0	0	0	0	0	0	0	0	0
Aco027422	0	0	0	0	0	0	0	0	0	0	0	0.427479	0	0
Aco027423	0	0	0	0	0	0	0	0	0	0	0	0.750584	0	0
Aco027437	0	0	0	0	0	0	0	0	0	0	0.148108	0	0	0
Aco027491	0	0	0	0.268334	0	0	0	0	0	0	0	0	0	0
Aco027494	0.253539	0	0	0	0	0	0	0	0	0	0	0	0	0
Aco027507	0	0	0	0.151013	0	0	0	0	0	0	0	0	0	0
Aco027577	0.159735	0.119284	0.271153	0.047909	0.115073	0.305258	0.07796	0.384685	0.436624	0.519651	0.492147	149.671	0	5.80863
Aco027615	0	0	0	0	0	0	0	0	0	0	0.172924	0	0	0
Aco027656	0	0	0	0	0	0	0	0	0	26.7621	0	0	0	0
Aco027701	1.33142	0	0	19.9729	0	0	0	0	0	0.106141	0.516796	0	0	0
Aco027713	0	0	0	0	0	0	0	0.496972	0	0	0	0	0	0
Aco027719	0	0	0	0	0	0	0	0	0	0	0	0.210335	0	0
Aco027720	3.27472	1.17252	2.33801	2.11671	2.71917	0.283805	0	1.23591	3.04838	220.725	2.95254	0.838475	4.2348	1.04048
Aco027741	0	0	0	0	0	0	0	0	0	3.49444	0	0	0	0
Aco027742	0.095681	0	0	0	0	0	0	0	0	12.1761	0	0	0	0
Aco027750	0	0	0	0	0	0.390175	0	0	0	0	0	0	0	0
Aco027839	0	0	0	0	0	0	0	0	0	0	0	1.07654	0	0
Aco027840	0	0	0	0	0	0	0	0	0	0	0	15.56	0	0.08066
Aco027873	4.27189	0	0	0	0	0	0	0	0	0	0	0	0	0
Aco027888	0	0	0	0	0	0	0	0	0	0.243918	0	0	0	0
Aco027929	0	0	0	0	0	6.15088	0	0	0	0	0	0	0	0
Aco027935	0	0	0	0	0	0	0	0	1.51844	0	0	0	0	0
Aco028003	0	3.03933	0	0	0	0	0	0	0	0.240404	0	0	0	0
Aco028006	0	0	0	0	0	0	0	0	0.166613	0	0	0	0	0
Aco028021	0	0	0	0	0	0	1.68195	0	0	0	0	0	0	0
Aco028045	0	0	0	0	0	0	0	0.18331	0	0	0	0	0	0
Aco028138	0	0	0	0	0	0	0	0	0	0.291905	0	0	0	0
Aco028142	0.224038	0	0	0	0	0	0	0	0	0	0	0	0	0
Aco028155	0	0	0	0	0	0	0	0.135774	0	0	0	0	0	0
Aco028176	1.30835	0.543597	2.75034	0.115893	0.981291	0.172728	0.342822	3.36519	2.98996	0.536157	0.897432	949.86	0	44.4656
Aco028202	0.193784	0	0	21.9795	0	0	0	0	0	0	0.12265	0	0	0
Aco028219	0	0	0	0.125157	0	0	0	0	0	0	0	0	0	0
Aco028220	0	0	0	0.611203	0	0	0	0	0	0	0	0	0	0
Aco028247	0	0	0	0	0	0	0	0	0	0	0	0	2.04651	0
Aco028344	0	0	0	0	0.297081	0	0	0	0	0	0	0	0	0
Aco028356	0.598897	0	0	0	0	0	0	0	0	0	0	0	0	0
Aco028373	0	0	0	0	0	0	0	0	0	0	0.165322	0	0	0
Aco028412	0	0	0	0	0.193511	0	0	0	0	0	0	0	0	0
Aco028421	0	0	0	0	0	0.160612	0	0	0	0	0	0	0	0
Aco028428	0	0	0	0	0	0	0	0	0	0.460274	0	0	0	0
Aco028436	0	0	0	0	0	0	0	0.153307	0	0	0	0	0	0
Aco028441	0	0	0	0	0	0	0	0	0	1.35701	0	0	0	0
Aco028474	0	0	0	0	0	0	0	0	0	0	0	8.16071	0	0
Aco028478	0	0	0	0	0	0	0	0	0	0	0	0	0	0.279228
Aco028491	0	0	0	0	0	0	0	0	0	0	0	18.6866	0	0
Aco028529	0	0	0	0	0	0	0	0	0	0	0.113794	0	0	0
Aco028530	0	0	0	0	0	0	0	0	0	0.197944	0	0	0	0
Aco028601	0	0	0	0.208063	0	0	0	0	0	0	0	0	0	0
Aco028627	0	0	0	0	0	0	0	0	0	0.253063	0	0	0	0
Aco028645	0	0	0	0	0	0	0	0	0	0	0	1.38403	0	0
Aco028652	0	0	0	0	0	0	0	0.267188	0	0	0	0	0	0
Aco028665	0.261726	0	0	0	0	0	0	0	0	0	0	0	0	0
Aco028669	0	0	0	3.70428	0	0	0	0	0	0	0	0	0	0
Aco028706	0	0	0	0	0.13027	0	0	0	0	0	0	0	0	0
Aco028720	0	0	0	0	0	0.150849	0	0	0	0	0	0	0	0
Aco028723	0	0	0	0	0	0	0	0	0	0	0	0.240423	0	0
Aco028808	0.177258	0	0	14.3766	0	0	0	0	0	0	0	0	0	0
Aco028809	0.328299	0	0.132539	33.6916	0	0	0	0	0	0	0.42528	0	0	0
Aco028832	0	0	0	0	0	0.164912	0	0	0	0	0	0	0	0
Aco028843	0	0	0	0	0	0	0	0	0	0	0	1.26702	0	0
Aco028866	0	0	0	0	0	0.150668	0	0	0	0	0	0	0	0
Aco028872	0	0	0	0	0	0	0	0	0	0.232152	0	0	0	0
Aco028883	0	0	0	0	0	0	0	0	0	0	0.983193	0	0	0
Aco028893	0	0	0	0	0	0	0	0	0	7.0097	0	0	0.262967	0
Aco028898	0.429683	0	0	0	0	0	0	0	0	0	0	0	0	0
Aco028920	0	0.472251	0	0	0	0	0	0	0	0	0	0	0	0
Aco028942	0	0	0.416879	0	0	80.0579	0	0	0	3.5315	0	0	0	0
Aco028956	0	0	0	0	0	0	0	0.392431	0	0	0	0	0	0
Aco028959	0	0	0	0.113332	0	0	0	0	0	0	0	0	0	0
Aco029009	0	0	0	0	0	0	0	0	0	0.870874	0	0	0	0
Aco029048	0	0	0	0.310076	0	0	0	0	0	0	0	0	0	0
Aco029097	0	0	0	0	0	0	0	0	0.445626	0	0	0	0	0
Aco029107	0	0.235386	0	0	0	0	0	0	0	0	0	0	0	0
Aco029109	0	0	0	0	0	0	0	0	0	0	0	0.123859	0	0
Aco029128	0	0	0	0	0	3.50563	0	0	0	0	0	0	0	0
Aco029139	0	0	0	0	0	0	0	0	0	0	0	0.726794	0	0
Aco029142	1.69004	0	0	39.8188	0	0	0	0.252744	0	0	0.409069	0	0	0
Aco029150	0	0	0.111179	0	0	0	0	0	0	0	0	0	0	0
Aco029164	0.196771	0	0	10.0625	0	0	0	0	0	0	0	0	0	0
Aco029179	0.151138	0	0	0	0	0	0	0	0	0	0	0	0	0
Aco029180	0	0	0	0	0	0	0	0	0	0	0.409068	0	0	0
Aco029238	0	0	0	0	0	0.575784	0	0	0	0	0	0	0	0
Aco029293	0	0	0	0.286439	0	0	0	0	0	0	0	0	0	0
Aco029320	0	0	0	0	0	0	0	0	0	0.19152	0	0	0	0
Aco029329	0	0	0	0	0.192773	0	0	0	0	0	0	0	0	0
Aco029332	0	0	0	0	0	0.420603	0	0	0	0	0	0	0	0
Aco029373	0	0	0	0	0	0	0	0	0.966402	0	0	0	0	0
Aco029399	0	0	0	0	0	0.391873	0	0	0	0	0	0	0	0
Aco029407	0	0	0	0	0	0	0	0	0	0	0	6.78381	0	0
Aco029424	0.120706	0	0	10.69	0	0	0	0.246271	0	0	0.194959	0	0	0
Aco029440	0	0	0	0	0	0	0	0	0	0	0	0.182631	0	0
Aco029441	0.451703	0	0	0	0	0	0	0	0	0	0	0	0	0
Aco029494	0	0	0	0	0	0	0	0	0	0	0	0.90676	0	0
Aco029522	0	0	0	0.178551	0	0	0	0	0	0	0	0	0	0
Aco029558	0	0	0	0.101949	0	0	0	0	0	0	0	0	0	0
Aco029559	0	0	0	0	0	0.454138	0	0	0	0	0	0	0	0
Aco029579	0.157635	0	0	3.89702	0	0	0	0	0	0	0.07958	0	0	0
Aco029586	0.851939	0	0	34.7053	0	0	0	0	0	0	2.23962	0	0	0
Aco029613	0	0	0	0.164338	0	0	0	0	0	0	0	0	0	0
Aco029622	0	0	0	0	0	0	0	0.102303	0	0	0	0	0	0
Aco029624	0.426511	0.861033	0	0	1.21011	0	0	0.333575	0	30.1932	0.261765	0	0.720253	0
Aco029640	0	0	0	0	0	0	0	0	0	0	0	0.638233	0	0
Aco029642	0	0	0	0	0	0	0	0	0	0	0	0.380588	0	0
Aco029653	0	0	0	0	0	0	0	0.425647	0	0	0	0	0	0
Aco029684	0	0	0.130988	0	0	0	0	0	0	0	0	0	0	0
Aco029698	0	0	0	0	0	0.173577	0	0	0	0	0	0	0	0
Aco029707	0	0	0	0	0	0	0	0	0	0	0.212711	0	0	0
Aco029719	0	0	0	0	31.274	0	0	0	0	0	0	0	0	0
Aco029741	0	0	0	0	0	0.272566	0	0	0	0	0	0	0	0
Aco029749	0	0	0	0	0	0.465117	0	0	0	0	0	0	0	0
Aco029752	0	0	0	0	0	0	0	0	0.288281	0	0	0	0	0
Aco029766	0.190358	0	0	0	0	10.2602	0.124201	0.083724	0	0.093909	0.218732	0	0	0.506803
Aco029774	0.419432	0	0	0	0	0	0	0	0	0	0	0	0	0
Aco029819	0	0	0	0	0	0.199643	0	0	0	0	0	0	0	0
Aco029822	0	0	0	0.561501	0	0	0	0	0	0	0	0	0	0
Aco029903	0	0	0	0	0	0	0	0	0	0	0	0.239682	0	0
Aco029905	0	0	0	9.77197	0	0	0	0	0	0	0	0	0	0
Aco029947	0	0	0	0	0	0	0	0	0	0	0	0	11.6647	0
Aco029957	0	0	0	0	0	0	0	0	0	0.120783	0	0	0	0
Aco030003	0.119283	0	0	0	0	0	0	0	0	0	0	0	0	0
Aco030009	0	0	0	0	0	0	0	0	0	0.566772	0	0	0	0
Aco030021	3.85921	0	0	0	0	0	0	0	0	0	0	0	0	0
Aco030057	0	0	0	0	0	0	0	0.134158	0	0	0	0	0	0
Aco030072	0	0	0	0	0	0	0	0	0	0	0	0.125311	0	0
Aco030139	0.483639	0	0	0	0	0	0	0	0	0	0	0	0	0
Aco030146	0	0	0	0	0	0	0	0	0	0	0.35694	0	0	0
Aco030148	0	0	0	0	0	0	0	0	0	0	0	0.881052	0	0
Aco030163	0	0	0	0.215358	0	0	0	0	0	0	0	0	0	0
Aco030173	0	0	0.453714	0	0.600905	156.887	0	0.215965	0.201406	0	0	5.06602	0	0.905056
Aco030185	0	0	0	0	0	0	0	0	0	0	0	0.727568	0	0
Aco030204	0	0	0.309043	0	0	0	0	0	0	0	0	0	0	0
Aco030217	0.184689	0	0	0.112442	0	0	0	0	0	9.23585	0	0	0	0
Aco030226	0	0	0	0.434155	0	0	0	0	0	0	0	0	0	0
Aco030245	0	0	0	0	0	0	0	0	0	5.31839	0	0	0	0
Aco030254	0	0	0	0	0	0	0	0	0	0	0	0.413887	0	0
Aco030289	0	0.119926	0	0	0	0	0	0	0	0	0	0	0	0
Aco030349	0	0	0	0	0	0	0	0	0	0	0	0.226394	0	0
Aco030362	0	0	0	0.101155	0	0	0	0	0	0	0	0	0	0
Aco030365	0.148673	0	0	0	0	0	0	0	0	0	0	0	0	0
Aco030376	1.95279	1.55555	3.0944	0.303064	1.25191	1.24835	0.292561	6.15147	3.0354	0.780124	1.1411	601.242	0	36.9026
Aco030384	0	0	0	0	0	0	0	0	0	10.7555	0	0	0	0
Aco030392	0	0	0	0	0	3.65931	0	0	0	0	0	0	0	0
Aco030409	0.284205	0	0.48767	0	0.542743	0	0	1.18294	1.54451	0	0.915898	614.174	0	29.852
Aco030427	0	0	0	0	0	0	0	0	0	0.72121	0	0	0	0
Aco030437	2.04799	0	0	0	0	0	0	0	0	0	0	0	0	0
Aco030470	0	0	0	0	0	0	0	0	0	0	0	0.269733	0	0
Aco030473	0	0	0	0	0	0.433018	0	0	0	0	0	0	0	0
Aco030511	0	0	0	0	0.283051	0	0	0	0	0	0	0	0	0
Aco030586	0	0	0	0.884079	0	0	0	0	0	0	0	0	0	0
Aco030590	0	0	0	0	0	0.201825	0	0	0	0	0	0	0	0
Aco030596	0.672227	0	0	0	0	0	0	0	0	0	0	0	0	0
Aco030690	0.029628	0	0.349713	0	0	0.12896	0.060739	0.078646	0	10.057	0.049893	0	0.053036	0.032066
Aco030693	0	0	0	0	0	0	0	0	0	0	0	0.207725	0	0
Aco030698	0	0	0	0	0.243916	0	0	0	0	0	0	0	0	0
Aco030721	0	0	0	0	0	0	0	0	0.181484	2.22851	0	0	0	0
Aco030784	0	0	0	0	0.136644	0	0	0	0	0	0	0	0	0
Aco030791	0	0	1.19793	0	0	0	0	0	0	0	0	0	0	0
Aco030792	0	0	0	22.1635	0	0	0	0	0	0	0.014103	0	0	0
Aco030856	0	0	0	0.491729	0	0	0	0	0	0	0	0	0	0
Aco030857	0	0	0	0.158442	0	0	0	0	0	0	0	0	0	0
Aco030865	0	0	0	0	0	0	0	0	0	0	0	0.337885	0	0
Aco030880	0	0.155663	0	0	0	0	0	0	0	0	0	0	0	0
Aco030906	0	0	0	0.102233	0	0	0	0	0	0	0	0	0	0
Aco030955	0	0	0	0	0.180883	0	0	0	0	0	0	0	0	0
Aco031006	0	0.193795	0	0	0	0	0	0	0	0	0	0	0	0
Aco031044	0	0	0	0	0	0	0	0	0	0	0	0.370372	0	0
Aco031046	0.297297	0	0	0	0	0	0	0	0	0	0	0	0	0
Aco031049	0	0	0	0	0	0	0	0	0	0.117864	0	0	0	0
Aco031088	0	0	0	0	0	0	0	0	0	0.46628	0	0	0	0
Aco031182	0.325067	0	0	0	0	0	0	0	0	0	0	0	0	0
Aco031192	0	0	0.234653	0	0	0	0	0	0	0	0	0	0	0
Aco031334	0	0	0	0	0	0	0	0.086931	0	0.675657	0	0	0	0
Aco031371	0	0	0	0	0	0.186208	0	0	0	0	0	0	0	0
Aco031415	0	0	0	0	0	0	0	0	0	2.22481	0	0	0	0
Aco031451	0	0	0	0	0	0	0	0	0	1.86889	0	0	0	0
Aco031453	0	0	0	1.08958	0	0	0	0	0	0	0	0	0	0
Aco031461	0	0.270851	0	0	0	0	0	0	0	0	0	0	0	0
Aco031483	0	0.208675	0	0	0	0	0	0	0	0	0	0	0	0
Aco031485	0	0	0	0	0	0	0	0	0	0.257329	0	0	0	0
Aco031495	0.221738	0	0	0	0	0	0	0	0	0	0	0	0	0
Aco031502	0	0	0	0	0	0	0	0.150171	0	0	0	0	0	0
Aco031520	0	0	0	0	0	0	0	0	0	0	0	0	0.158499	0
Aco031523	0	0	0	0	0.183044	0	0	0	0	0	0	0	0	0
Aco031539	0	0	0	0	0	0	0	0	0	0.485779	0	0	0	0
Aco031622	0	0	0.440019	0	0	0	0	0	0	0	0	0	0	0
Aco031666	0.141994	0	0	0	0	0	0	0	0	0	0	0	0	0
Aco031714	0	0	0	0	0	0	0	0	0	0	0	0.323085	0	0
Aco031759	0	0	0	0	0	0	0	13.2697	0	0	0	0	0	0
Aco031773	0	0	0	0	0	0	0	0.620432	0	0	0	0	0	0
Aco031800	0	0	0	2.6249	0	0	0	0	0	0	0	0	0	0
Aco031801	0	0	0	0	0	0	0	0	0	0	0	1.22481	0	0
Aco031818	0	0	0	0	0	0	0	0	0	0.647712	0	0	0	0
Aco031849	0	0.128508	0	0	0	0	0	0	0	0	0.007249	0	0	0
Aco031860	0.198859	0	0	5.96233	0	0	0	0	0	0	0.163326	0	0	0
Aco031863	0	0	0	0	0	0	0	0.551379	0	0	0	0	0	0
Aco031876	0	0	0	0	0	0	0	0	0	0	0	0.588965	0	0
