# Supplementary material for: Comprehensive tissue-specific transcriptome profiling of pineapple (Ananas comosus) and building an eFP-browser for further study
Source: PeerJ. 2018 Dec 4;6:e6028. doi: 10.7717/peerj.6028 (PMC6284516; doi:10.7717/peerj.6028)
Supplement: Supplemental Information 11 [file peerj-06-6028-s011.xlsx]

## Sheet: Sheet1
Table S5. Expression patterns of specific-expressing genes of pineapple during fruit development
GeneID	Bract_1	Bract_2	Bract_3	Sepal_1	Sepal_2	Sepal_3	Flower_disk_1	Flower_disk_2	Flower_disk_3	Receptacle_1	Receptacle_2	Receptacle_3	Ovary_wall_1	Ovary_wall_2	Ovary_wall_3	Placenta_1	Placenta_2	Placenta_3	Ovule_1	Ovule_2	Ovule_3	Stamen_1	Style_1	Core_1	Core_2	Core_3	Petal_1	Stem_1	Stem_2	Stem_3	Leaf_1	Leaf_2	Leaf_3	Root_1	Root_2	Root_3
Aco010275	0	0	0	0	0	0	0	0	0	0	0	0	0	0	0	0	0	0	0	0	0	0	0	0	0	0	0	0	0	0	0.215208	0	0.117259	0	0	0
Aco011795	0	0	0	0	0	0.046192	0	0	0	0.405894	0.053563	0.044841	0	0	0.042527	0.055341	0	0	0.068084	0	0.136474	193.608	8.89424	0.135426	0.471835	0.244112	0	0	0	0	0	0	0	0	0	0
Aco010134	0	0	0	0	0	0	0.843334	0	0	1.23949	0	0	0	0	0	0.170533	0	0	0	0	0	615.824	38.2445	0	0.385063	0	0	0	0	0	0	0	0.132487	0	0	0
Aco019219	1.61323	1.19659	4.19072	0	0	0	0	0	0	0	0	0	0	0	0	0	0	0	0	0	0	0	0	0	0	0	0	0.859288	0	0.929067	233.838	39.6989	10.4743	0.622035	0.11619	0
Aco030721	0	0	0	0	0	0	0	0	0	0.181484	0	0	0	0	0	0	0	0	0	0	0	0	0	0	0	0	0	0	0	0	0	0	0	0.66325	1.90961	2.22851
Aco006026	0	0	0	0	0	0	0	0	0	0	0	0	0	0	0	0	0	0.207749	0	0	0	0	0	0	0	0	0	0	0	0	0	0	0	0	0	0
Aco006116	0	0	0	0	0	0	0	0	0	0	0	0	0	0	0	0	0	0.27333	0	0	0	0	0	0	0	0	0	0	0	0	0	0	0.027588	0	0	0
Aco006925	0	0	0	0	0	0	0	0	0	0	0	0	0	0	0	0	0	0	0	0	0	0	0	0	0	0	0	0	0	0	0	0	0	1.48181	0.849604	4.68164
Aco029707	0	0	0	0	0	0.212711	0	0	0	0	0	0	0	0	0	0	0	0	0	0	0	0	0	0	0	0	0	0	0	0	0	0	0	0	0	0
Aco028006	0	0	0	0	0	0	0	0	0	0	0.166613	0	0	0	0	0	0	0	0	0	0	0	0	0	0	0	0	0	0	0	0	0	0	0	0	0
Aco030693	0	0	0	0	0	0	0	0	0	0	0	0	0	0	0	0	0	0	0	0	0	0.207725	0	0	0	0	0	0	0	0	0	0	0	0	0	0
Aco020673	0	0	0	0	0	0	0	0	0	0	0	0	0	0	0	0	0	0	0	0	0	0	0	0	0	0	0.254211	0	0	0	0	0	0	0	0	0
Aco023093	0	0.199618	0.347674	0	0	0.355563	0	0.18612	0.927687	0	0	0	0	0	0	0	0	0	0	0	0	0	0	0	0	0	0	0	0	0	0	0	0	57.1437	40.6604	32.035
Aco011459	0	1.16532	0	0.572167	0	0	37.6439	0	0.797449	18.5435	0	0	0.362815	0	0	1.77606	0	0	2.29702	0	1.61982	6787.83	16.2294	0	1.293	0	2.29942	1.3384	0.872589	0	0.658765	0	0	0	0.580195	0
Aco019837	0	0	0.10935	0	0	0	0	0	0	0	0	0	0	0	0	0	0	0	0	0	0	0	0	0	0	0	0	0	0	0	0	0	0	0	0	0
Aco024960	0	0	0.414245	0	0	0	0	0	0	0	0	0	0	0	0	0	0	0	0	0	0	0	0	0	0	0	0	0	0	0	0	0	0	0	0	0
Aco003870	0	0	0.218752	0	0	0	0	0	0	0	0	0	0	0	0	0.300621	0	0	0	0	0	8.57122	0	0	0	0	0	0.359782	0	0	0	0	0	0	0	0
Aco026747	0	0	0	0	0	0	0	0	0	0	0	0	0	0	0	0	0	0	0	0	0	0	0	0	0	0	0.564412	0	0	0	0	0	0	0	0	0
Aco025246	0	0	0	0	0	0	0	0	0	0	0	0	0	0	0	0	0	0	0	0	0	0	0	0	0	0	0	0	0	0	0.334782	0.859507	0.311	0	0	0
Aco024890	0	0	0	0	0	0	0	0	0	0	0	0	0	0	0	0	0	0	0	0.981969	0	0	0	0	0	0	0	0	0	0	0	0	0	0	0	0
Aco031483	0	0	0	0	0	0	0	0	0	0	0	0	0	0	0	0	0	0	0	0	0	0	0	0.208675	0	0	0	0	0	0	0	0	0	0	0	0
Aco014720	0	0	0	0	0	0	0	0	0	0	0	0	0	0	0	0	0	0	0.128057	0	0	5.88623	0.24054	0	0	0	0	0	0	0	0	0	0	0	0	0
Aco016497	0	0	0	0	0	0	0	0	0	0	0	0	0	0	0	0	0	0	0	0	0	0	0	0	0	0.119717	0	0	0	0	0	0	0	0	0	0
Aco008391	0	0.446266	1.88874	0.436898	0	0.268041	0	0	0.977356	0	0	0	0	0	0	0	0	0	0	0	0	0	0	0	0	0	0	0	0	0	0	0	0.29182	46.2469	36.5012	35.6252
Aco020678	0	0	0	0	0	0	0	0	0	0	0	0	0	0	0	0	0	0	0	0	0	0	0	0	0	0	0	0	0	0	0	0	0	0	0.113055	0.323573
Aco004817	0	0	0	0	0	0	0.821414	0	0	0	0	0	0	0	0	0	0	0	0	0	0	0	0	0	0	0	0	0	0	0	0	0	0	0	0	0
Aco001157	0	0	0	0	0	0	0	0	0	0	0	0	0	0	0	0	0	0	0	0.407788	0	0	0	0	0	0	0	0	0.390624	0	0	0	0	1.85223	6.90955	11.7857
Aco006156	0	0	0	0	0	0	0.221379	0	0	0.419403	0	0	0	0	0	0	0	0	0	0	0	539.436	25.7705	0	0	0	0	0	0	0	0	0	0	0	0	0
Aco029164	0	0.196771	0	0	0	0	0	0	0	0	0	0	0	0	0	0	0	0	0	0	0	0	0	0	0	0	0	0	0	0	0	0	10.0625	0	0	0
Aco029559	0	0	0	0	0	0	0	0	0	0	0	0	0	0	0	0	0	0	0	0	0.454138	0	0	0	0	0	0	0	0	0	0	0	0	0	0	0
Aco021565	0	0	0.173893	0	0	0	0	0	0	0	0	0	0	0	0	0	0	0	0	0	0	0	0	0	0	0	0	0	0	0	0	0	0	0	0	0
Aco008353	0	0	0	0	0	0	0	0	0	0	0	0	0	0	0	0	0	0	0	15.0183	0	0	0	0	0	0	0	0	0	0	0	0	0	0	0	0
Aco013906	0	0	0	0	0	0	0	0	0	0	0	0	0	0	0	0	0	0	0	0.083516	0	7.1338	0.207268	0	0	0	0.090815	0	0	0	0	0	0	0	0	0
Aco016881	0	0	0	0	0	0	0	0	0	0	0	0	0	0	0	0	0	0	0	0	0	3.22019	0	0	0	0	0	0	0	0	0	0	0	0.237168	0	0
Aco019723	0	0	0	0	0	0	0	0	0	0	0	0	0	0	0	0	0	0	0	0	0	0.230109	0	0	0	0	0	0	0	0	0	0	0	0	0	0
Aco009057	0	0	0	0	0	0	0.259982	0	0	0	0	0	0	0	0	0.09156	0	0	0	0	0	106.915	4.78003	0	0	0	0	0	0	0	0	0.085851	0.083109	0	0.507708	0.423887
Aco011924	16.3944	3.77796	13.935	16.4747	7.64565	12.0555	1.89446	0	0	0.39922	0	0	0	0	0	0	0	0	0	0	0	0.383962	1.339	0.14156	0	0	3.75979	0	0.295716	0	313.379	365.876	443.301	0.95074	0.153998	0.460832
Aco023811	0	0	0	0	0	0	0	0	0	0	0	0	0	0	0	0	0	0	0.305705	0	0	0.255684	0	0	0	0	0	0	0	0	0	0	0	5.38539	9.73862	2.34976
Aco014452	0.475179	0	1.34019	1.57237	0	1.35604	0	0	0	0.176003	0	0	0	0	0	0	0	0	0	0	0	0	0	0	0	0.124148	0	0	0	0	16.135	24.1434	26.5356	0	0	0
Aco000693	1.07401	1.75819	1.12289	1.32375	1.10271	1.67896	3.22104	1.88592	1.46277	2.78807	0.935752	1.02226	1.46134	1.93146	1.17827	0.841272	1.97491	1.43244	1.61746	16.1469	2.42315	348.487	1.71695	0.980522	0.409834	2.6622	0.637114	0.134813	0.709882	0.519739	0.534763	0.427231	0.616377	3.15601	2.42544	2.42007
Aco011738	1.03534	0	0.349138	0.724944	0.450397	1.23652	11.971	7.71944	0	4.45484	0.283607	0	1.44911	1.63996	1.09551	1.67241	0.443856	0.261143	156.649	657.773	0	0	1.77117	0	0.226942	0	0	0.634056	0	0	14.7999	5.52042	9.92112	2.65044	0.053323	1.98067
Aco015389	0	0	0	0	0	0	0	0	0	0	0.355908	0	0	0	0	0.045089	0	0	0	0.101371	0	0	0	0.128497	0	0	0	0	0	0.106595	0	0.072281	0	5.27871	2.03471	10.9162
Aco007424	0	0	0	0	0	0	0	0	0	0	0	0	0	0	0	0	0	0	0	0.065028	0	3.35514	0	0	0	0	0	0	0	0	0	0	0	0	0	0
Aco019966	0.801928	0	0	0	0	0	0	0	0	0	0	0	0	0	0	0	0	0	0	0	0	0	0	0	0	0	0	0	0	0	0	0	0	0	0	0
Aco024851	0	0	0	0	0	0	0	0	0	0	0	0	0	1.19296	0	0	0	0	0	0	0	0	0	0	0	0	0	0	0	0	0	0	0	0	0	0
Aco018733	0	0	0.277418	0	0	0.2585	0	0	0	0	0	0	0	0	0	0	0	0	1864.15	0.360407	0.40911	0	4.01818	0	0.821273	0	0	0	0	0	0	0	0.336203	0	0	0
Aco023031	0	0	0	0	0	0	0	0	0	0	0	0	0	0	0	0	0.198481	0	0	0	0	0	0	0	0	0	0	0	0	0	0	0	0	0	0	0
Aco019299	0.170076	0	0	0.1597	0	0	2.48787	0	0	1.16183	0.130885	0	0	0	0	0	0	0	0.728427	10.3432	0.22896	577.812	0.467292	0	0	0	0	0	0	0	0	0	0	3.67861	0.651298	30.5195
Aco025370	0	0	0.171412	0	0	0	0	0	0	0	0	0	0	0	0	0	0	0	0	0	0	0	0	0	0	0	0	0	0	0	0	0	0	0	0	0
Aco000872	0	0	0	0	0	0	0	0	0	0	0	0	0.361922	0	0	0	0	0	0	0	0	0	0	0	0	0	0	0	0	0	0	0	0	0	0	0
Aco020714	0.091926	0	0	0.072445	0	0	0.15936	0	0	0.238452	0	0	0.268449	0	0	0.234343	0	0	0	0	0	14.6477	0.139177	0.126819	0	0	0	0	0	0	0	0	0	0	0	0
Aco018017	0	0	0	0	0	0	0	0	0	0	0	0	0	0	0	0	0	0	0	0	0	0	0.27615	0	0	0	0	0	0	0	0	0	0	0	0	0
Aco022355	0	0	0	0	0	0	0	0	0	0	0	0	0	0	0	0	0	0	0	0	0	0	0	0	0	0	0	0.168484	0	0	0	0	0	0	0	0
Aco005492	4.41436	3.29922	2.36742	1.77598	3.0816	0.517597	2.21864	3.0489	1.14458	1.55294	0.959897	0	0.920361	5.57121	0	0	1.8865	0.26463	0.267699	0	0.409643	538.347	1.36063	2.59305	0	1.70539	0.242433	0.599161	0	0	0.594798	0.45665	0.753919	6.23705	7.40328	6.52602
Aco004687	0	0	0	0	0	0	0	0	0	0	0	0	0	0	0	0	0	0	0	0	0	0	0	0	0	0	0	0	0	0	0	0	0	0.115484	0.104381	0.21199
Aco020605	0	0.237131	0	0	0	0	0	0	0	0	0	0	0	0	0	0	0	0	0	0	0	0	0	0	0	0	0	0	0	0	0	0	0	0	0	0
Aco012493	0	0.442366	0	0	0	0	0	0	0	0	0	0	0	0	0	0	0	0	0	0	0	0	0	0	0	0	0	0.908994	0	0	0	0	0	20.8148	16.9719	11.2332
Aco009183	6.1335	1.71751	7.72288	4.31582	1.38353	7.92051	0.209781	0	0.185543	0.248121	0	0	0	0	0	0	0	0	0	0	0	0	0	0	0	0	0.16253	0	0	0	150.272	159.417	206.796	0.099872	0	0.797861
Aco020211	0	0	0	0	0	0	0	0	0	0	0	0	0	0	0	0	0	0	0	0	0	0	0	0	0	0	0	0	0	0	0	0	10.4912	0	0	0
Aco014076	0	0	0	0	0	0	0	0	0	0	0	0	0	0	0	0	0	0	0	0	0	0	0	0	0	0	0	0	0	0	0	0	0	0	0.296672	0.398371
Aco020232	0	0	0	0	0	0	0	0	0	0	0	0	0	0	0	0	0	0	0.509577	0	0	0	0	0	0	0	0.019293	0	0	0	0	0	0	0	0	0
Aco003573	2.80272	0	0	1.48083	0	0	4.0837	0	0	2.70334	0	0	0.784209	0	0	4.33653	0	0	1.0192	0	0	538.806	32.3138	0.417254	0	0	0.297314	0	0.106228	0	0	0	0	0.486845	0.083272	0.58465
Aco013061	9.37885	13.281	10.1104	5.92492	9.48802	1.8751	3.99892	7.42196	1.53305	8.12523	10.7423	0.456496	3.88283	5.74948	0.299315	6.0192	0.610599	0.901059	5.03677	0.29	0	1.02096	4.71119	30.119	2.10158	4.92834	4.39573	1564.78	170.558	123.563	0.345947	0.436917	0.478174	15.7289	5.4503	5.40002
Aco000667	0	0.189634	0	0.392096	0.185476	0.177221	0	0.686013	0.606744	0	0	0	0	0	0	0.186418	0	0	0	0	0	40.4987	1.78142	0	0	0	0	0	0	0	0	0.187558	0	0.464433	1.48443	1.10046
Aco000766	0	0.115567	0	0	0	0.165906	0	0.071263	0.042262	0	0	0	0.142708	0	0	0	0	0	0	0	0	0.075384	0.150802	0.085409	0.115492	0	0	0	0	0	0	0.045428	0	142.934	67.3141	60.123
Aco003918	0	0	0	0	0	0	0	0	0	0	0	0	0	0	0	0	0	0	0	0	0	0	0	0	0	0	0	0	0	0	0.906015	1.52263	3.27822	0	0	0
Aco030511	0	0	0	0	0	0	0	0	0	0	0	0	0.283051	0	0	0	0	0	0	0	0	0	0	0	0	0	0	0	0	0	0	0	0	0	0	0
Aco018671	10.3489	6.86916	9.08709	1.04545	1.00546	1.1182	1.10713	0.09366	0.120522	1.06467	0.778494	5.40039	0.41209	0.257731	1.8812	0.082678	0.078433	2.34551	0.102405	0.068287	0.557331	2.2625	2.0928	0	0.060502	2.04169	3.7808	0	0	0	160.66	287.312	280.381	0.655424	1.31574	0.839652
Aco020511	0	0	0	0	0	0	0	0	0	0	0	0	0	0	0	0	0	0	0	0	0	1.02552	0	0	0	0	0	0	0	0	0	0	0	0	0	0
Aco002553	1.38215	0	0	1.32011	0	0	5.57516	0	0	3.10272	0	0	1.70776	0	0	3.02225	0	0	0.587977	0	0.265459	1188.02	60.9934	0.247299	0.125154	0	0	0	0	0	0.256002	0	0	0.30228	0	0
Aco000536	0.464419	0	0.650205	0	0.541788	0	0.250185	0	0	0.235228	0	0	0	0	0	0.16908	0	0	0.291404	2.48574	0.196721	0.612718	0.328655	0	0	0	0.358547	1.90867	7.21537	6.64809	0	0.920155	0.423522	113.712	97.4679	105.979
Aco025661	0	0	0	0	0	0.67728	0	0	0	0	0	0	0	0	0	0	0	0	0	0	0	0	0	0	0	0	0	0	0	0	0	0	0	0	0	0
Aco021573	0	0	0	0	0	0	0	0	0	0	0	0	0	0	0	0	0	0	0	0	0	0	0	0	0	0	0	0	0	0	3.17936	0	0	0	0	0
Aco007946	0	0.046852	0	0	0	0	0	0	0	0	0	0.009239	0	0	0	0	0	0	0	0	0	4.91533	0	0	0	0	0	0	0	0	0	0	0	0	0	0.527745
Aco022261	0	0	0	0	0	0	0	0	0	0	0	0	0	0	0	0	0	0	0	0	0	0	0	0	0	0	0.539221	0	0	0	0	0	0	0	0	0
Aco009753	0	0	0	0	0	0	0	0	0	0	0	0	0	0	0.420908	0	0	0	0	0	0	0	0	0	0	0	0	0	0	0	0	0	0	0	0	0
Aco013065	0	0	0	0	0	0	0	0	0	0	0	0	0	0	0	0	0	0	0	0	0	0	0	0	0	0	0	0.353496	0	0	0	0	0	0	0	0
Aco019988	0	0	0.309187	0	0	0	0	0	0	0	0	0	0	0	0	0	0	0	0	0	0	0	0	0	0	0	0	0	0	0	0	0	0	0	0	0
Aco018042	0.074809	0	0	0	0	0	0	0	0	0	0	0	0.167105	0	0	0.053859	0	0	0	0	0	22.3711	1.00988	0	0	0	0	0	0	0	0	0	0	0.046495	0.05136	0
Aco022823	0	0	0	0	0	0	0	0	0	0	0	0	0	0	0	0	0	0	0	0	0	0	0	0	0	0	0	0	0	0	0	0.123184	0.044329	0	0	0
Aco004207	0	0	0	0	0	0	0	0.6131	0	0	0	0	0	0	0	0	0	0	0	0	0	0	0	0	0	0	0	0	0	0	0	0	0	0	0	0
Aco026269	0	0	0	0	0	0	0	0	0	0	0	0	0	0	0	0	0	0	1.55648	0	0	0	0	0	0	0	0	0	0	0	0	0	0	0	0	0
Aco015402	0	0	0	0	0	0	0	0	0	0	0	0	0	0	0	0	0	0	0	0	0	0	0	0	0	0	0.140183	0	0	0	0	0	0	0	0	0
Aco024241	0	0	0	0	0	0	0	0	0	0	0	0	0	0	0	0	0	0	0	0	0	0	0	0	0	0	0	0	0	0	0	0	0	0	0.811033	0
Aco022550	0	0	0	0	0	0	0	0	0	0	0	0	0	0	0	0	0	0	0	0	0	0	0	0	0	0	0	0	0	0	0	0	0	0.620667	0.664623	0
Aco011754	0	0	0.165913	0	0	0	0	0	0	0	0	0	0	0	0	0	0	0	0	0	0	0	0	0	0	0	0	0	0	0	0	0	0	0	0	0
Aco010242	0.175883	0	0	0	0	0	1.29966	0	0	0.445416	0	0	0	0	0	0	0	0	0	0	0	126.766	5.57299	1.21173	0	0	0	0	0	0	0	0	0	0	0	0
Aco009987	1.44272	0	0	0	0	0	1.17411	0	0	1.47806	0	0	0.888581	0	0	0.562832	0	0	0	0.236097	0	143.147	5.70501	0.316633	0	0	0	0	0	0	0.459185	0.202956	0	0.201438	0	0
Aco021856	0	0	0	0	0	0	0	0	0	0	0	0	0	0	0	0.377951	0	0	0	0	0	0	0	0	0	0	0	0	0	0	0	0	0	0	0	0
Aco007894	0	0	0	0	0	0	0	0	0	0	0	0	0	0	0	0.134677	0	0	0	0	0	0	0	0	0	0	0	0	0	0	0	0	0	0	0	0
Aco002050	0	0	0	0	0	0	0	0	0	0	0	0	0	0	0	0	0	0	0	0	0	0	0	0	0	0	0	0	0	0	0	0	0	0	0	0.247149
Aco013978	0	0.048143	0.056989	0	0	0.043971	0.502034	0	0	1.10131	0	0.049614	0	0	0	0	0	0	0	0	0.062866	434.212	1.96749	0.076099	0	0.057886	0.047257	0	0	0	0	0	0.048968	0	0.058311	0
Aco009190	0	0	0	0	0	0.118776	0	0	0	0	0	0	0	0	0	0	0	0	0	0	0	1.12186	0	0	0	0	0	0	0	0	0	0	0	0	0	0
Aco021175	0.123638	0	0	0	0	0	0	0	0	0	0	0	0	0	0	0	0	0	0	0	0	0	0	0	0	0	0	0	0	0	0	0	0	0	0	0
Aco024080	0	0	0	0	0	0	0	0	0	0	0	0	0	0	0	0	0	0	0	0	0	0	0	0.140267	0	0	0	0	0	0	0	0	0	0	0	0
Aco030185	0	0	0	0	0	0	0	0	0	0	0	0	0	0	0	0	0	0	0	0	0	0.727568	0	0	0	0	0	0	0	0	0	0	0	0	0	0
Aco025555	0	0	0	0	0	0	0	0	0	0.248802	0	0	0	0	0	0	0	0	0	0	0	0	0	0	0	0	0	0	0	0	0	0	0	0	0	0
Aco016287	0.099679	0	0.072935	0.480475	0.443411	0	0	0	0	0	0	0	0	0	0	0.160442	0	0	0.104156	0	0	0	0	0	0	0	0	0	0.074391	0	24.0973	27.1458	47.0076	0.072089	0	0
Aco022637	0	0	0	0	0	0	0	0	0	5.26775	3.82001	0	0	0	0	0	0	0	0	0	0	0	0	0	0	0	0	0	0	0	0	0	0	0	0	0
Aco014714	0	0	0	0	0	0	0.166559	0	0	0	0	0	0	0	0	0	0	0	0	0	0	0	1.72996	0	0	0	0	0	0	0	0	0	0	0	0	0
Aco028956	0	0	0	0	0	0	0	0	0	0	0	0	0	0	0	0	0	0.392431	0	0	0	0	0	0	0	0	0	0	0	0	0	0	0	0	0	0
Aco028959	0	0	0	0	0	0	0	0	0	0	0	0	0	0	0	0	0	0	0	0	0	0	0	0	0	0	0	0	0	0	0	0.113332	0	0	0	0
Aco023257	0	0	0	0	0	0	0	0	0	0	0	0	0	0	0	0	0	0	0	0	0	0	0	0	0	0	0	0	0	0	0	0	0.530219	0	0	0
Aco012096	0	0	0	0	0	0	0.186978	0	0	0.369293	0	0	0	0	0	0.501074	0	0	0	0	0	98.096	3.41544	0.2421	0	0	0	0	0	0	0	0	0	0	0	0
Aco000225	0	0	0	0	0	0	0	0	0	0	0	0	0	0	0	0	0	0	0	0	0	0.263533	0	0	0	0	0	0	0	0	0	0	0	0	0	0
Aco013928	0	0	0	0	0	0	0	0	0	0	0	0	0	0	0	0	0	0	0	0	0	0	0	0	0	0	0	0	0	0	0	0	0	0	0	0.491928
Aco004648	0	0	0	0	0	0	0	0	0	0	0	0	0	0	0	0	0	0	0	0	0	0	0	0	0	0	0	0	0	0	0	0.344767	0	0	0	0
Aco019151	0	0	0	0	0	0.554398	0	0	0	0	0	0	0	0	0	0	0	0	0	0	0	0	0	0	0	0	0	0	0	0	0	0	0	0	0	0
Aco010478	0	0	0	0	0	0	0	0	0	0	0	0	0.21534	0	0	0	0	0	0	0	0	0	0	0	0	0	0	0	0	0	0	0	0	6.26523	1.72904	1.71012
Aco031334	0	0	0	0	0	0	0	0	0	0	0	0	0	0	0	0.086931	0	0	0	0	0	0	0	0	0	0	0	0	0	0	0	0	0	0.675657	0	0
Aco023522	0	0	0	0	0	0	0	0	0	0	0	0	0	0	0	0	0	0	0	0	0	0	0	0	0	0	0	0	0	0	0	0	0	1.86011	1.64942	1.39192
Aco010429	0	0	0	0	0	0	0	0	0	0	0	0	0	0	0	0	0	0	0	0	0	0	0	0	0	0	0	0	0	0	0	0	0.244768	0	0	0
Aco002622	0	0	0	0	0	0	0	0	0	0	0	0	0	0	0	0	0.113552	0	0	0	0	0	0	0	0	0	0	0	0	0	0	0	0	0	0	0
Aco020032	0	0	0	0	0	0	0	0	0	0	0	0	0	0	0	0	0	0	0	0	0	0	0	0	0	0	0	0.100538	0	0	0	0	0	0	0	0
Aco027038	0	0	0	0	0	0	0	0	0	0	0	0	0	0	0	0	0	0	0	0	0	0.619678	0	0	0	0	0	0	0	0	0	0	0	0	0	0
Aco030865	0	0	0	0	0	0	0	0	0	0	0	0	0	0	0	0	0	0	0	0	0	0.337885	0	0	0	0	0	0	0	0	0	0	0	0	0	0
Aco023814	0	0	0	0.015975	0	0	0	0	0	0	0	0	0	0	0	0	0	0.022652	0	0	0	0.930918	0	0	0	0	0	0	0	0	0	0	0	0	0	0
Aco025466	0	0	0	0	0	0	0	0	0	0	0	0	0	0	0	0	0	0	0	0	0	0	0	0	0	0	0	0	0	0	0	0	0	0.494244	0.436942	0.869121
Aco004351	0.150642	0	0	0	0	0	0	0	0	0	0	0	0	0	0	0	0	0	1.2933	3.25878	0	0	0	0	0	0	0	0	0	0	0	0	0	0	0	0
Aco028412	0	0	0	0	0	0	0	0	0	0	0	0	0.193511	0	0	0	0	0	0	0	0	0	0	0	0	0	0	0	0	0	0	0	0	0	0	0
Aco015036	0	0.241449	0	0	0	0	0	0	0	0	0	0	0	0	0	0	0	0	0	0	0	0	0	0	0	0	0	0	0	0	0	0	0	0	0	0
Aco024629	0	0	0	0	0	0	0	0	0	0	0	0	0	0	0	0	0	0	0	0	0	0	0	0	0	0	0	0	0	0	0	0	0.528243	0	0	0
Aco028003	0	0	0	0	0	0	0	0	0	0	0	0	0	0	0	0	0	0	0	0	0	0	0	3.03933	0	0	0	0	0	0	0	0	0	0	0	0.240404
Aco024843	0	0	0	0	0	0	0	0	0	42.3017	0	0	0	0	0	0	0	0	0	0	0	0	0	0	0	0	0	0	0	0	0	0	0	0	0	0
Aco030409	0.284205	0	0	0.915898	0	0	0.48767	0	0	1.54451	0	0	0.542743	0	0	1.18294	0	0	0	0	0	614.174	29.852	0	0	0	0	0	0	0	0	0	0	0	0	0
Aco020913	0	0	0	0	0	0	0	0	0	0	0	0	0	0	0	0	0	0	0	0	0	0	0	0	0	0	0	0	0	0	0	0	0.389178	0	0	0
Aco006397	0	0	0	0.102064	0	0	0	0	0	0	0	0	0	0	0	0	0	0	0	0	0	0	0	0	0	0	0	0	0	0	0	0	0	0	0	0
Aco006333	0	0.526428	0	0	0	0	0	0	0	0	0	0.568821	0	0	0	0	0	0	0	0	0	0	0	0	0	0	0	0	0	0	0	0	0.015901	151.563	93.8186	87.9686
Aco031666	0	0.141994	0	0	0	0	0	0	0	0	0	0	0	0	0	0	0	0	0	0	0	0	0	0	0	0	0	0	0	0	0	0	0	0	0	0
Aco029622	0	0	0	0	0	0	0	0	0	0	0	0	0	0	0	0	0	0.102303	0	0	0	0	0	0	0	0	0	0	0	0	0	0	0	0	0	0
Aco020987	0	0	0	0	0	0	0	0	0	0	0	0	0	0	0	0	0	0	0	0	0	0	0	0	0	0	0	0	0	0	0.146824	0.518117	0	0	0	0
Aco023800	0	0	0	0	0	0.067874	0.309884	0	0	0.053759	0	0	0.118705	0	0	0	0	0	0.214974	0.044629	0	14.9092	0	0	0	0	0	0.171691	0.170227	0	0.03092	0	0.028473	0	0.245493	0.026986
Aco002150	0	0	0	0	0	0	0	0	0	0.269467	0	0	0	0	0	0	0	0	0	0	0	0	0	0	0	0	0	0	0	0	0	0	0	0	0	0
Aco012574	2.19004	1.0327	1.33051	3.90937	0.98556	3.26891	0	0	0	0	0	0	0	0	0	0	0	0	0	0	0	0	0	0	0	0	0	0	0	0	97.5545	73.3459	94.0755	0	0	0
Aco019615	0	0	0	0	0	0	0	0	0	0	0	0	0	0	0	0	0	0	0	0	0	0	0	0	0	0	0	155.63	6.23421	13.5736	0	0	0	0.384974	0.719883	0.10485
Aco009724	0	0	0	0	0	0	0	0	0	0	0	0	0	0	0	0	0	0	0	0	0	0	0	0	0	0	0	0	0	0	0	0	0	0	0.151271	0
Aco017124	0	0	0	0	0	0	0	0	0	0	0	0	0	0	0	0	0	0	0	0	0	0	0	0	0	0	0	0	0	0	0	0	0	0.335126	0.271293	2.16535
Aco013340	0.00685	0	0	0.310967	0	0	0	0	0	0	0	0	0	0	0	0	0.193615	0	0	0	0	14.4749	0.151652	0	0	0	1.18907	0	0	0	0	0	0	0	0	0
Aco008961	0.374861	0	0	0.129085	0	0	0	0	0	0	0	0	0.103808	0	0	0.726315	0	0	0	0	0	15.4998	0.434532	0.119737	0	0	0	0	0	0	0	0	0	0	0	0
Aco011773	0	0	0	0	0	0	0	0	0	0	0	0	0	0	0	0	0	0	0	0	0	0	0	0	0	0.400439	0	0	0	0	0	0	0	0	0	0
Aco016630	0	0	0	0	0	0	0	0	0	0	0	0	0	0	0	0	0	0	0	0	0	0.737515	0	0	0	0	0	0	0	0	0	0	0	0	0	0
Aco029494	0	0	0	0	0	0	0	0	0	0	0	0	0	0	0	0	0	0	0	0	0	0.90676	0	0	0	0	0	0	0	0	0	0	0	0	0	0
Aco025213	0	0	0	0	0	0	0	0	0	0	0	0	0	0	0	0	0	0	0	0	0	0	0	0	0	0	0	0	0	0	0	0	0.106022	0	0	0
Aco019525	0	0	0	0	0	0	0	0	0	0	0	0	0.200011	0	0	0	0	0	0	0	0	0.375834	0.220066	0	0	0	0.427232	0	0.109913	0	11.9353	11.9797	6.27227	0	0	0
Aco001920	0	0	0	0	0	0	0	0	0	0	0	0	0	0	0	0	0	0	0	0	0	1.03704	0	0	0	0	0	0	0	0	0	0	0	0	0	0
Aco021725	0	0	0	0	0	0	0	0	0	0	0	0	0	0	0	0	0	0	0	0	0	0.228978	0	0	0	0	0	0	0	0	0	0	0	0	0	0
Aco025070	0	0	0	0	0	0	0	0	0	0	0	0	0	0	0	0	0	0	0	0	0	2.55118	0.051281	0	0	0	0	0	0	0	0	0	0	0.106005	0	0.233264
Aco021707	0	0	0	0	0	0	0	0	0	0	0	0	0	0	0	0	0	0	0	0	0	0	0	0	0	0	0	0	0	0	0	0	0	0.109729	0	0
Aco024022	0	0	0	0	0	0	0	0	0	0	0	0	0	0	0	0	0	0	0	0	0	0	0	0	0	0	0	0	0	0	0	0	0	0.136792	0	0
Aco016513	0	0	0	0	0	0	0	0	0	0	0.220502	0	0	0	0	0	0	0	0	0	0	0	0	0	0	0	0	0	0	0	0	0	0	0	0	0
Aco014526	0	0	0	0	0	0	0	0	0	0	0	0	0	0	0	0	0	0	0	0	0	0	0	0	0	0	0	0	0	0	0	0	0	0.686685	0.979137	0.822194
Aco026161	0	0	0	0.52737	0	0	0	0	0	0	0	0	0	0	0	0	0	0	0	0	0	0	0	0	0	0	0	0	0	0	0	0	0	0	0	0
Aco013084	0	0	0	0.238464	0	0	0	0	0	0	0	0	0	0	0	0	0	0	0	0	0	0	0	0	0	0	0	0	0	0	0	0	0	0	0	0
Aco021828	0	0	0	0	0	0	0	0	0	0	0	0	0	0	0	0	0	0	0	0	0	0	0	0	0	0	0	0	0	0	0	0	0	0.18809	0.313349	0
Aco025134	0	0	0	0	0	0	0	0	0	0.161074	0	0	0	0	0	0	0	0	0	0	0	0	0	0	0	0	0	0	0	0	0	0	0	0	0	0
Aco025908	0	0	0	0.255437	0	0	0	0	0	0	0	0	0	0	0	0	0	0	0	0	0	0	0	0	0	0	0	0	0	0	0	0	0	0	0	0
Aco001823	0	0	0.087656	0	0	0	0	0	0	0	0	0	0	0	0	0	0	0	0	0	0	2.8297	0	0	0	0	0	0	0	0	0	0	0	0	0.062076	0
Aco013334	0	0	0	0.642952	0	0	0	0.481645	0	0.9813	0	0	0	0.395052	0	0	0	0.353005	0.39033	0.662913	0	0.249726	0	0	0	0	0.470868	0	0	0	26.9373	28.4719	46.7171	0.300677	0	0
Aco021324	0	0	0	0	0.238616	0	0	0	0	0	0	0	0	0	0	0	0	0	0	0	0	0	0	0	0	0	0	0	0	0	0	0	0	0	0	0
Aco018741	0	0	0	0	0	0	0.548645	0	0	0.337524	0	0	0.303911	0	0	0	0	0	91.6595	0	0	0	8.80542	0	0	0	0.617901	0	0	0	0	0	0	0	0	0
Aco021585	0	0	0	0	0	0	0	0	0	0.162751	0	0	0	0	0	0	0	0	0	0	0	0	0	0	0	0	0	0	0	0	0	0	0	0	0	0
Aco004125	0	0	0	0	0	0	0	0	0	0	0	0	31.4448	0	0	0	0	0	0	0	0	0	0	0	0	0	0	0	0	0	0	0	0	0	0	0
Aco030072	0	0	0	0	0	0	0	0	0	0	0	0	0	0	0	0	0	0	0	0	0	0.125311	0	0	0	0	0	0	0	0	0	0	0	0	0	0
Aco009736	0	0	0	0	0	0	0	0	0	0	0	0	0	0	0	0	0	0	0	0	0	12.9665	0	0	0	0	0	0	0	0	0.268885	0	0.21083	0	0	0
Aco000379	0	0	0	0	0.526288	0	0	0	0	0	0	0	0	0	0	0	0	0	0	0	0	0	0	0	0	0	0	0	0	0	0	0	0	0	0	0
Aco010225	0.116236	0	0	0	0	0	0	0	0.124792	0	0	0	0	0	0	0	0	0	0	0	0	0	0	0	0	0	0	0	0	0	0	0.133371	0	19.8596	11.6168	13.0783
Aco018094	0	0	0	0	0	0	0	0	0	0	0	0	0	0	0	0	0	0	0	0	0.220115	0	0	0	0	0	0	0	0	0	0	0	0	0	0	0
Aco017335	8.95489	3.89199	12.9552	9.71086	5.2424	10.0136	0.32939	0	0	0.137707	0	0	0	0	0.132867	0	0	0	0	0	0	0.798434	0.388291	0	0	0	0.601306	0	0	0	304.034	230.023	269.79	0	0	0.584836
Aco008387	0	0	0	0.213956	0	0	0	0	0.91597	0	0	0	0	0	0	0	0	0	0	0.251686	0	0	0	0	0	0	0	0	0	0	0	0	0	59.1408	22.7838	35.0189
Aco026732	0	0	0	0	0	0	0	0	0	0	0	0	0	0	0	0	0	0	0	0	0	0	0	0	0	0	0	0	0	0	0	0	0.209852	0	0	0
Aco015838	0	0	0	0	0	0	0	0	0	0	0	0	0	0	0	0	0	0	0	0	0	14.698	0	0	0	0	0	0	0	0	0	0	0	0	0	0
Aco026546	0	0	0	0	0	0	0	0	0	0	0	0	0	0	0	0	0	0	0	0	0	0	0	0	0	0	0	0	0	0	0	0	0	0	0.49464	0
Aco011947	0	0	0	0	0	0	0	0	0	0	0	0	0	0	0	0	0	0	0	0	0	4.60791	0	0	0	0	0	0	0	0	0	0	0	0	0	0
Aco018622	0	0	0	0	0	0	0	0	0	0	0	0	0	0	0	0	0	0	0	0	0	0	0	0	0	0	0	0	0	0	0	0.112451	0	0	0	0
Aco008601	0	0	0	0	0.122716	0.372429	0.455728	0.938362	0.190992	0.249257	0.245536	0.438193	0.953987	0.247751	0.497284	0.836871	0.916731	1.67525	0	0	0.25832	0.186867	0.2003	0.9897	0.228537	0.360816	0	0	0	0.683742	0.142529	0.164619	0	77.5427	67.5376	134.699
Aco008541	0	0	0	0	0	0	0	0	0	0	0	0	0	0	0	0	0	0	0	0	0	0	0	0	0	0.035253	0	0	0	0	0	0	0	1.33987	0.706324	1.47777
Aco029905	0	0	0	0	0	0	0	0	0	0	0	0	0	0	0	0	0	0	0	0	0	0	0	0	0	0	0	0	0	0	2.89513	4.71093	9.77197	0	0	0
Aco028155	0	0	0	0	0	0	0	0	0	0	0	0	0	0	0	0.135774	0	0	0	0	0	0	0	0	0	0	0	0	0	0	0	0	0	0	0	0
Aco008911	0	0	0	0	0	0.288878	0	0	0.172475	0.121093	0	0.064234	0	0	0	0.177492	0	0	0.257959	0	0.15707	87.6546	3.12717	0	0	0	0	0	0	0	0	0	0.071758	0.202274	0.1016	0
Aco015424	0.166065	0	0.222724	0	0	0	0	0	0	0	0	0	0	0	0	0	0	0	0	0	0	0	0	0	0	0	0	0	0	0	0	0	0	0	0	0
Aco001292	0.096263	0	0	0	0	0	0	0	0	0	0.071288	0	0	0	0	0	0	0	0	0.076151	0	14.5987	0	0	0	0	0	0	0.197106	0	1.11204	0.39575	0.789208	0	0	0
Aco001956	0	0	0	0	0	0	0	0	0	0	0	0	0	0	0	0	0	0	0	0	0	0	0	0	0	0	0	0	0	0	0.142018	0	0	0	0	0
Aco020767	0	0	0	0	0	0	0	0	0	0	0	0	0	0	0	0	0	0	0	0	0	0	0	0	0	0	0	0	1.82622	0	0	0	0	0	0	0
Aco010634	0	0	0	0	0	0	0	0	0	0	0	0	0	0	0	0	0	0	0	0	0	0.105327	0	0	0	0	0	0.244868	0	0	0	0	0	1.04293	5.64986	1.42657
Aco029719	0	0	0	0	0	0	0	0	0	0	0	0	31.274	0	0	0	0	0	0	0	0	0	0	0	0	0	0	0	0	0	0	0	0	0	0	0
Aco003432	0	0	0	0	0	0	0	0	0	0	0	0	0	0	0	0	0	0	0	0	0	0	0	0	0	0	0	0	0	0	0	0	0	0	0	0.198257
Aco023666	0.134285	0	0	0	0	0	0	0	0	0	0	0	0	0	0	0	0	0	0	0	0	0	0	0	0	0	0	0	0	0	0	0	0	0	0	0
Aco021034	0	0	0	0	0	0	0	0	0	0	0	0	0	0	0	0	0	0	0	0	0	0	0	0	0	0	0	0	0	0	0.127293	0.081776	0.14571	0	0	0
Aco024754	0	0	0	0	0	0	0	0	0	0	0	0	0	0	0	0	0	0	0	0	0	0.132924	0	0	0	0	0	0	0	0	0	0	0	0	0	0
Aco027437	0	0	0	0	0	0.148108	0	0	0	0	0	0	0	0	0	0	0	0	0	0	0	0	0	0	0	0	0	0	0	0	0	0	0	0	0	0
Aco028872	0	0	0	0	0	0	0	0	0	0	0	0	0	0	0	0	0	0	0	0	0	0	0	0	0	0	0	0	0	0	0	0	0	0	0	0.232152
Aco031520	0	0	0	0	0	0	0	0	0	0	0	0	0	0	0	0	0	0	0	0	0	0	0	0	0	0	0	0	0	0.158499	0	0	0	0	0	0
Aco027577	0.087851	0.159735	0	0	0.492147	0.130417	0.271153	0	0	0.436624	0.057826	0	0	0.115073	0	0.384685	0	0.051269	0.305258	0.222101	0.04791	149.671	5.80863	0.067865	0	0.119284	0.07796	0	0	0	0	0.047909	0	0.519651	0.119836	0
Aco018752	0	0	0	0	0	0	0	0	0	0	0	0	0	0	0	0	0	0	61.8648	0	0	0	0	0	0	0	0	0	0	0	0	0	0	0	0	0
Aco023571	0	0	0	0	0	0	0	0	0	0	0	0	0	0	0	0	0	0	0	0	0	0	0	0	0	0	0	0	0	0	0	0	0	0	0.507418	0
Aco016622	0.323778	0.189152	0	0.139839	0	0	0	0	0	0.239848	0	0	0.172687	0	0	0	0	0	0	0	0	12.4744	0	0	0	0	0	0	0	0	0	0	0	0	0	0
Aco019992	0	0	0	0	0	0.112734	0	0	0	0	0	0	0	0	0	0	0	0	0	0	0	0	0	0	0	0	0	0	0	0	0	0	0	0	0	0
Aco014119	46.6574	38.9016	59.9476	49.7124	47.0831	63.0322	4.42777	1.85276	1.57099	2.21	0.484704	0.22623	0	0.684313	0	0	0.192106	0.087968	0.201622	0.111894	0	2.76524	4.84962	0.138163	0.441129	0.418776	10.6911	0.118823	0.438706	0	1223.5	1095.08	1392.23	1.18528	0.312164	2.46204
Aco018295	0	0	0.169378	0	0	0	0	0	0	0	0	0	0	0	0	0	0	0	0	0	0	0	0	0	0	0	0	0	0	0	0	0	0	0	0	0
Aco030906	0	0	0	0	0	0	0	0	0	0	0	0	0	0	0	0	0	0	0	0	0	0	0	0	0	0	0	0	0	0	0	0.102233	0	0	0	0
Aco018737	0	0	0	0	0	0	0.27843	0	0	0	0	0	0	0	0	0	0	0	415.75	0	0	0	0.797048	0	0	0	0	0	0	0	0	0	0	0	0	0
Aco003546	0	0	0	0	0	0	0	0	0	0	0	0	0	0	0	0	0	0	0	0	0	0.558908	0	0	0	0	0	0	0	0	0	0	0	0	0	0
Aco030226	0	0	0	0	0	0	0	0	0	0	0	0	0	0	0	0	0	0	0	0	0	0	0	0	0	0	0	0	0	0	0	0.434155	0	0	0	0
Aco013454	0	0	0	0	0	0	0	0	0	0	0	0	0	0	0	0	0	0	0.902354	7.03589	0	0	0	0	0	0	0	0	0	0	0	0	0	0	0	0
Aco012482	0	0.349363	0	0	0	0	0	0	0	0	0	0	0	0	0	0	0	0	0	0	0	0	0	0	0	0	0	0	0	0	0	0	0	0	0	0
Aco009350	0	0	0	0	0	0	0	0	0	0	0	0	0	0	0	0	0	0	0	0	0	1.09122	0	0	0	0	0	0	0	0	0	0	0	0	0	0
Aco016371	0	0	0	0	0	0	0	0	0	0	0	0	0	0	0	0	0	0	0	0.258949	0	0	0	0	0	0	0	0	0	0	0	0	0.444519	10.125	3.32105	9.36989
Aco028883	0	0	0	0.983193	0	0	0	0	0	0	0	0	0	0	0	0	0	0	0	0	0	0	0	0	0	0	0	0	0	0	0	0	0	0	0	0
Aco022351	0	0	0	0	0	0	0	0	0	0	0	0	0.418372	0	0	0	0	0	0	0	0	0	0	0	0	0	0	0	0	0	0	0	0	0	0	0
Aco027507	0	0	0	0	0	0	0	0	0	0	0	0	0	0	0	0	0	0	0	0	0	0	0	0	0	0	0	0	0	0	0.151013	0.040423	0	0	0	0
Aco016309	0	0	0	0	0	0	0	0	0	0	0	0	0	0	0	0	0	0.236578	0	0	0	0	0	0	0	0	0	0	0	0	0	0	0	0	0	0
Aco017406	0	0	0	0	0	0	0	0	0	0	0	0	0	0	0	0	0	0	0	0	0	0	0	0	0	0	0	0	0	0	0	0.582742	0.989732	0	0	0
Aco019643	0	0.575065	0	0	0	0	0	0	0	0	0	0	0	0	0	0	0	0	0	0	0	0	0	0	0	0	0	0	0	0	0	0	0	0	0	0
Aco010360	0	0	0	0	0	0	0	0	0	0	0	0	0	0	0	0	0	0	0	0	0	0	0	0	0	0	0	0	0	0	0	0	0	0.40209	0	0
Aco018930	0	0	0	0	0	0	0	0	0	0	0	0	0	0	0	0	0	0	0	0	0	1.72237	0	0	0	0	0	0	0	0	0	0	0	0	0	0
Aco026175	0	0	0	0	0	0	0	0	0	0	0	0	0	0	0	0	0	0	0	0	0	0.145067	0	0	0	0	0	0	0	0	0	0	0	0	0	0
Aco028356	0	0.136499	0.598897	0	0	0	0	0	0	0	0	0	0	0	0	0	0	0	0	0	0	0	0	0	0	0	0	0	0	0	0	0	0	0	0	0
Aco009817	0.190614	0	0	0	0	0	0	0	0	0	0	0	0	0	0	0	0	0	0	0	0	2.98911	0	0	0	0	0	0	0	0	0	0	0	0	0	0
Aco002117	0	0	0	0	0.067513	0	0	1.18511	0	0	0.666712	0	0	1.15461	1.40114	0	0.762294	5.48305	1.08361	249.534	54.113	0.358743	0.300941	0	0	0.07534	0	0	0	0	0	0	0	3.30202	2.57654	3.93092
Aco000263	0	0	0	0.10657	0	0	0	0	0	0.149652	0	0	0	0	0.094833	0	0	0	0	0	0	7.75384	0.158032	0	0	0	0	0	0	0	0.095812	0	0	0	0	0
Aco014204	0.094665	0	0	0	0	0	0	0	0	0	0	0	0	0	0	0	0	0	0.344716	0.115576	0.098247	95.0212	0.600187	0	0	0	0	0	0	0	0	0.065256	0	0	0	0
Aco010815	0.157428	0	0	0	0	0	0	0	0	0	0	0	0	0	0	0	0	0	0	0	0	0	0	0	0	0	0	0	0	0	0	0	0	0	0	0
Aco014010	0	0	0	0	0	0	0	0	0	0	0	0	0	0	0	0	0	0	0	0	0	3.33508	0	0	0.004116	0	0	0	0	0	0	0	0	0	0	0
Aco007368	0	0	0	0	0	0	0	0	0	0	0	0	0	0	0	0	0	0	0	0	0	4.92854	0	0	0	0	0	0	0	0	31.1867	21.508	50.4181	0	0	0
Aco007900	0	0	0	0	0	0	0	0	0	0	0	0	0	0	0	0	0	0	0	0	0	2.27472	0	0	0	0	0	0	0	0	0	0	0	0	0	0
Aco024631	1.80482	0.438009	1.87626	1.15789	0.296198	2.64955	0	0.138856	0	0	0	0	0	0	0	0	0.185973	0	0	0.255771	0.173562	0	0.406933	0	0	0	0	0	0	0	59.6942	73.4862	94.4426	0.132867	0.127884	0
Aco012412	0.223339	0.512414	0.126827	0.380024	0	0	0.425952	0	0.210097	0.180155	0	0.09388	0	0	0	0	0	0.2448	0	0.158558	0.169585	97.7824	0.26541	0	0	0.637188	0	0.091972	0	0	0.156055	0	0	3.12349	0.857764	2.80745
Aco030384	0	0	0	0	0	0	0	0	0	0	0	0	0	0	0	0	0	0	0	0	0	0	0	0	0	0	0	0	0	0	0	0	0	10.7555	0	0
Aco027713	0	0	0	0	0	0	0	0	0	0	0	0	0	0	0	0	0.496972	0	0	0	0	0	0	0	0	0	0	0	0	0	0	0	0	0	0	0
Aco025188	0.095274	0	0	0	0	0	0	0	0	0	0	0.086156	0	0	0	0	0	0	0	1.2265	0	0	0	0	0	0	0	0	0	0	0	0	0	5.83368	3.9244	18.4574
Aco024366	0	0	0.208773	0	0	0	0	0	0	0	0	0	0	0	0	0	0	0	0	0	0	0	0	0	0	0	0	0	0	0	0	0	0	0	0	0
Aco015915	0	0	0	0	0	0	0.311843	0	0	0	0	0	0	0	0	0	0	0	0	0	0	0	0	0	0	0	0	0	0	0	0	0	0	0	0	0
Aco028601	0	0	0	0	0	0	0	0	0	0	0	0	0	0	0	0	0	0	0	0	0	0	0	0	0	0	0	0	0	0	0	0.208063	0	0	0	0
Aco026001	0	0	0	0	0	0	0	0	0	0	0	0	0	0	0	0	0	0	0	0	0	44.8052	0	0	0	0	0	0	0	0	0	0	0	0	0	0
Aco000526	0	0	0	0	0	0	0.083993	0	0	0	0	0	0	0	0	0.122931	0	0.057791	0	0	0	13.0948	0.560266	0	0	0	0	0	0	0	0	0	0	0	0	0
Aco022071	0	0	0	0	0	0	0	0	0	0	0	0	0	0	0	0	0	0	0	0	0	0	0	0	0	0	0	0	0	0	0	0	0	0	0.348118	0
Aco008713	0	0	0	0	0	0	0	0	0	0	0	0	0	0	0	0	0	0	0	0	0.141575	94.4354	2.42185	0	0	0	0	0	0	0	0	0	0	0	0	0
Aco024192	0	0	0	0	0	0	0	0	0	0	0	0	0	0	0	0	0	0	2.17287	0	0	0	0	0	0	0	0	0	0	0	0	0	0	0	0	0
Aco015630	0	0	0	0	0	0	0	0	0	0	0	0	0	0	0	0	0	0	0	0	0	0.413769	0	0	0	0	0	0	0	0	0	0	0	0	0	0
Aco021818	0	0	0	0	0	0	0	0	0	0	0	0	0	0	0	0	0	0	0	0	0	0	0	0	0	0	0	0	0	0	0	0	0	0.322087	0.500043	1.2236
Aco004710	0.196467	0	0.298655	0	0	0	0.102283	0.092782	0.117853	0	0	0	0.19399	0	0.521316	0	0.241687	0.329725	0.54969	0.398316	0.074939	0.216151	0	0	0.046193	0.200931	0	0	0.25109	0.182574	0.060414	0.272837	0.141747	8.87417	4.87418	46.608
Aco022783	0	0	0	0	0	0	0	0	0	0	0	0	0	0	0	0	0	0	0	0	0	0	0	0	0	0	0	12.6757	0	0	0	0	0	0	0	0
Aco013752	0	0	0	0	0	0	0	0	0	0	0	0	0	0	0	0	0	0	0	0	0	0.892587	0	0	0	0	0.478022	6.40771	0	0.256047	0	0	0	34.8836	99.1813	28.3239
Aco029407	0	0	0	0	0	0	0	0	0	0	0	0	0	0	0	0	0	0	0	0	0	6.78381	0	0	0	0	0	0	0	0	0	0	0	0	0	0
Aco009717	1.14378	0.743017	2.98276	1.1748	0.779434	2.67559	0	0	0	0	0.077865	0.287413	0.758855	0	0	1.00956	0.140219	0.059603	0	0	0	0.273734	0	0	0	0.201828	0	0.137397	0	0	162.515	246.798	281.159	0.21296	0.141177	0.34628
Aco025940	0	0	0	0	0	0	0	0	0	0	0	0	0	0	0	0	0	0	0	0	0	0	0	0	0	0	0	0	2.60697	0	0	0	0	0	0	0
Aco010911	0	0	0	0	0	0	0	0	0	0	0	0	0	0	0	0	0	0	0	0	0	0	0	0	0	0	0	0	0.560133	0	0	0	0	0	0	0
Aco031523	0	0	0	0	0	0	0	0	0	0	0	0	0.183044	0	0	0	0	0	0	0	0	0	0	0	0	0	0	0	0	0	0	0	0	0	0	0
Aco030146	0	0	0	0	0	0.35694	0	0	0	0	0	0	0	0	0	0	0	0	0	0	0	0	0	0	0	0	0	0	0	0	0	0	0	0	0	0
Aco016561	0	0	0	0	0	0	0	0	0	0	0	0	0	0	0	0	0	0	0	0	0	0.365242	0	0	0	0	0	0	0	0	0	0	0	0	0	0
Aco029180	0	0	0	0.409068	0	0	0	0	0	0	0	0	0	0	0	0	0	0	0	0	0	0	0	0	0	0	0	0	0	0	0	0	0	0	0	0
Aco017155	0	0	0	0	0	0	0	0	0	0	0	0	0	0	0	0	0	0	0	0	0	0.517977	0	0	0	0	0	0	0	0	0	0	0	0	0	0
Aco019957	0	0	0	0	0	0	0	0	0	0	0	0	0	0	0	0	0	0	0	0	0	3.31604	0	0	0	0	0	0	0	0	0	0	0	0	0	0
Aco018617	0	0	0	0	0	0	0	0	0	0	0	0	0	0	0	0.125085	0	0	0	0	0	5.15172	0.39885	0	0	0	0	0	0	0	0	0	0	0	0	0
Aco022245	0	0	0	0	0	0	0	0	0	0	0	0	0	0	0	0	0	0	0	0	0	0.602072	0	0	0	0	0	0	0	0	0	0	0	0	0	0
Aco017489	2.96306	0	0	0.51939	0	0	0.625445	0	0	0.970764	0	0	2.76308	0	0	1.61891	1.11444	0	0	0	0.454762	619.959	46.6949	0.096565	0	0	0.112766	0	0	0	0	0	0.503138	0.558865	0	0
Aco013385	0.104916	0	0	0	0	0	0	0	0	0	0	0	0	0	0	0	0	0	0	0	0	0	0	0	0	0	0	0	0	0	0	0	0	0	0	0
Aco031495	0	0.221738	0	0	0	0	0	0	0	0	0	0	0	0	0	0	0	0	0	0	0	0	0	0	0	0	0	0	0	0	0	0	0	0	0	0
Aco022060	0.178122	0	0	0	0	0	0	0	0	0	0	0	0	0	0	0	0	0	0	0	0	0	0	0	0	0	0	0	0	0	0	0	0	0	0	0
Aco007066	0	0	0	0	0	0	0.210611	0	0	0	0	0	0	0	0	0	0	0	0	0	0	9.693	0	0	0	0	0	0	0	0	0	0	0	0.069461	0	0
Aco020275	0.139215	0	0	0	0	0	0	0	0	0	0	0	0	0	0	0	0	0	0	0	0	0	0	0	0	0	0	0	0	0	0	0	0	0	0	0
Aco004346	0	0	0	0	0	0	0	0	0	0	0	0	0	0	0	0	0	0	0	0.846903	0	0	0	0	0	0	0	0	0	0	0	0	0	0	0	0
Aco021988	0	0	0	0	0	0	0	0	0	0	0	0	0	0	0	0	0	0	0	0	0	1.90145	0	0	0	0	0	0	0	0	0	0	0	0	0	0
Aco028723	0	0	0	0	0	0	0	0	0	0	0	0	0	0	0	0	0	0	0	0	0	0.240423	0	0	0	0	0	0	0	0	0	0	0	0	0	0
Aco012393	0.070362	0	0	0	0	0	0.692785	0	0	1.17478	0	0.068461	0.117537	0	0.064305	0.078145	0	0.151504	0	0.143042	0.060204	251.896	0.912644	0.18678	0.077432	0	0	0	0	0.164456	0	0	0	0.076645	0.142524	0
Aco005965	0	0	0	0	0	0	0	0	0	0	0	0	0	0	0	0	0	0	0	0	0	0	0	0	0	0	0	0	0	0	1.75126	0	0.13901	0	0	0
Aco000714	0	0	0	0	0	0	0	0	0	0	0	0	0	0	0	0	0	0	0	0	0	0	0.393242	0	0	0	0	0	0	0	0	0	0	0	0	0
Aco024586	0	0.448235	0.70852	0	0	0	0	0	0	0	0	0	0	0	0	0	0	0	0	0	0	0	0	0	0	0	0	0	0	0	0	0	0	0	0	0
Aco015144	0	0	0	0	0	0	0	0	0	0	0	0	0	0	0	0	0	0	0.14358	0	0	0	0	0	0	0	0	0	0	0	0	0	0	0	0	0
Aco011077	0	0	0	0	0	0	0	0	0	0	0	0	0	0	0	0	0	0	0	0	0	0	0.222216	0	0	0	0	0	0	0	0	0	0	0	0	0
Aco030163	0	0	0	0	0	0	0	0	0	0	0	0	0	0	0	0	0	0	0	0	0	0	0	0	0	0	0	0	0	0	0.147654	0	0.215358	0	0	0
Aco012877	0	0	0	0	0	0	0	0	0	0	0	0	0	0	0	0	0	0	0	0	0	0	0	0	0	0	0	0	0	0	0	0	0.596062	0	0	0
Aco004830	0	0	0	0	0	0	0	0	0	0	0	0	0.260502	0	0	0	0	0	0	0	0	0	0	0	0	0	0	0	0	0	0	0	0	0	0	0
Aco028866	0	0	0	0	0	0	0	0	0	0	0	0	0	0	0	0	0	0	0	0.150668	0	0	0	0	0	0	0	0	0	0	0	0	0	0	0	0
Aco031818	0	0	0	0	0	0	0	0	0	0	0	0	0	0	0	0	0	0	0	0	0	0	0	0	0	0	0	0	0	0	0	0	0	0	0.647712	0
Aco031461	0	0	0	0	0	0	0	0	0	0	0	0	0	0	0	0	0	0	0	0	0	0	0	0.270851	0	0	0	0	0	0	0	0	0	0	0	0
Aco031044	0	0	0	0	0	0	0	0	0	0	0	0	0	0	0	0	0	0	0	0	0	0.370372	0	0	0	0	0	0	0	0	0	0	0	0	0	0
Aco022463	0	0	0	0	0	0	0	0	0	0	0	0	0	0	0	0	0	0	0	0	0	0	0	0	0	0	0	0	0	0	0	0.956068	0	0	0	0
Aco027839	0	0	0	0	0	0	0	0	0	0	0	0	0	0	0	0	0	0	0	0	0	1.07654	0	0	0	0	0	0	0	0	0	0	0	0	0	0
Aco007346	0	0	0	0	0	0	0	0	0	0	0	0	0	0	0	0	0	0	0	0	0	0	0	0	0	0.418597	0	0	0	0	0	0	0	0	0	0
Aco012701	0	0	0	0	0	0	0.176298	0.093812	0	0.096054	0	0	0	0	0	0	0	0	0.079929	0	0	64.1754	0	0.060956	1.0856	0	0.070484	0	0	0	0	0	0	0.130179	0.912973	0
Aco007153	1.15071	0	0	0.291403	0.063973	0	2.32866	0	0	2.32285	0	0	0.802996	0	0	3.09876	0	0	0.145482	0	0.226936	1007.31	56.5982	0.461849	0.067004	0	0.452642	0	0	0.042144	0	0	0.033028	0.387085	0.386961	0.665885
Aco011816	0	0	0	0	0	0.062889	1.03966	0	0	1.07411	0	0	0.840335	0	0	0	0	0	0.210768	0	0	187.738	1.34238	0.201921	0	0	0.5888	0	0	0.184809	0	0.055099	0	0.0733	0	0.172308
Aco010371	0.483269	0	0.253834	0.363353	0.462008	0	0.343457	0.46331	0.608375	0.653556	0	0.303421	0.675476	0.231576	0.357803	0.159649	0.575202	0.508143	0.906642	2.39769	0.94433	154.871	7.21669	0	0	0	1.02858	0	0	0.261431	0.665081	0.651334	0.521074	0.499493	0.471127	0.828312
Aco006354	0	0	0	0	0	0	0	0	0.458195	0	0	0	0	0	0	0	0	0	0	0	0	0	0	0	0	0	0	0	0	0	0	0	0	0	0	0
Aco030437	0.264334	0.899803	2.04799	0	0	0	0	0	0	0	0	0	0	0	0	0	0	0	0	0	0	0	0	0	0	0	0	0	0	0	0	0	0	0	0	0
Aco012890	0	0	0	0	0	0	0	0	0	0	0	0	0	0	0	0	0	0	0	0	0	24.067	0	0	0	0	0	0	0	0	0	0	0	0.110889	0.303493	0
Aco023892	0	0	0	0	0	0	0	0	0	0	0	0	0	0	0	0	0	0	0	0	0	0	0	0.914297	0	0	0	0	0	0	0	0	0	0	0	0
Aco027082	0	0	0	0	0	0	0	0	0	0	0	0	0	0	0	0	0	0.100854	0	0	0	0	0	0	0	0	0	0	0	0	0	0	0	0	0	0
Aco026374	0	0	0	0.589257	0	0	1.1412	0	0	0.701357	0	0	0.239678	0	0	2.10449	0	0	0.131314	0	0.060131	457.285	21.8379	0.196948	0	0	0	0	0	0	0	0	0	0.223721	0	0
Aco005156	2.20648	1.16796	2.9442	1.31941	2.40518	3.97841	0.50745	0.36135	0.345034	0.505536	0.344624	0	1.14792	0.301217	0.567923	0	0	0	0	0.557495	0.251192	0	0.469648	1.09285	0.423364	0.551605	0	0	0	1.07906	105.189	136.564	173.462	0.251624	0	1.93589
Aco017961	0	0	0	0	0	0	0	0	0	0	0	0	0	0	0	0	0.156285	0	0	0	0	0	0	0	0	0	0	0	0	0	0	0	0	0	0	0
Aco016234	0	0	0	0	0	0	0	0	0	0	0	0	0	0	0	0	0	0	0	0	0	0.151796	0	0	0	0	0	0	0	0	0	0	0	0	0	0
Aco027296	0	0	0	0	0	0	0	0	0	0	0	0	0	0	0	0	0	0	0	0.334474	0	0	0	0	0	0	0	0	0	0	0	0	0	0	0	0
Aco000616	0.126604	0	0.309862	0.241293	0	0	0	0	0	0	0	0	0	0.201555	0	0.104284	0	0	1.62839	0.11377	0	34.8698	0.951295	0	0	0.083196	0	0	0	0	0	0	0	0	0	0
Aco028530	0	0	0	0	0	0	0	0	0	0	0	0	0	0	0	0	0	0	0	0	0	0	0	0	0	0	0	0	0	0	0	0	0	0	0.197944	0
Aco001213	0	0	0	0	0	0	0	0	0	0	0	0	0	0	0	0	0	0	0.849998	2.09546	0	0	0	0	0	0	0	0	0	0	0	0	0	0	0	0
Aco012185	0	0.284572	0	0	0	0	0	0	0	0	0	0	0	0	0	0	0	0	0	0	0	0	0	0	0	0	0	0	0	0	0	0	0	0	0	0
Aco024977	0.132351	0	0	0	0	0	0	0	0	0	0	0	0	0	0	0	0	0	0	0	0	0	0	0	0	0	0	0	0	0	0	0	0	0	0	0
Aco021386	0	0	0	0	0	0	0	0	0	0	0	0	0	0	0	0	0	0	0	0	0	0	0	0	0	0	0	0	0	0	0	0.327341	0	0	0	0
Aco023058	0	0	0	0	0	0	0	0	0.136082	0	0	0	0	0	0	0	0	0	0	0	0	0	0	0	0	0	0	0	0	0	0	0	0	0	0	0
Aco029332	0	0	0	0	0	0	0	0	0	0	0	0	0	0	0	0	0	0	0.420603	0	0	0	0	0	0	0	0	0	0	0	0	0	0	0	0	0
Aco028176	1.30835	0	0	0.897432	0	0	2.75034	0	0	2.98996	0	0	0.981291	0	0	3.36519	0	0	0.172728	0.040934	0.105221	949.86	44.4656	0.543597	0	0.032984	0.342822	0	0	0	0.115893	0	0	0.536157	0	0.090115
Aco030003	0	0	0.119283	0	0	0	0	0	0	0	0	0	0	0	0	0	0	0	0	0	0	0	0	0	0	0	0	0	0	0	0	0	0	0	0	0
Aco010446	0	0	0	0	0	0	0.440783	0	0	0	0	0	0	0	0	0.438743	0	0	0	0	0	0	0	0	0	0	0	0	0	0	0	0	0	50.6704	43.431	30.8177
Aco020986	0	0	0	0	0	0	0	0	0	0	0	0	0	0	0	0	0	0	0	0	0	0	0.344014	0	0	0	0	0	0	0	0	0	0	0	0	0
Aco014120	0.469568	0.644885	0	0	0	0	1.2424	0	0	0.233537	0	0	0.633496	0	0	1.03344	0	0	0	0	0	287.829	15.7975	0	0	0	0	0	0	0	0.579215	0	0	0	0	0
Aco024905	0	0	0	0	0	0	0	0	0	0	0	0.194315	0	0	0	0	0	0	0	0	0	0	0	0	0	0	0	0	0	0	0	0	0	0	0	0
Aco018291	0	0	1.14301	0	0	0	0	0	0	0	0	0	0	0	0	0	0	0	0	0	0	0	0	0	0	0	0	0	0	0	0	0	0	0	0	0
Aco011093	0	0	0	0	0	0	0	0	0	0	0	0	0	0	0	0	0	0	0	0	0	0	0	0	0	0	0	0	0	0.340062	0	0	0	0	0	0
Aco016631	0	0	0	0	0	0	0	0	0	0	0	0	0	0	0	0.23672	0	0	0	0	0	0	0	0	0	0	0	0	0	0	0	0	0	0	0	0
Aco024502	0	0	0	0	0	0	0	0	0	0	0	0	0	0	0	0	0	0	0	0	0	0	0	0	0	0	0.186811	0	0	0	0	0	0	0	0	0
Aco023956	0	0	0	0	0	0	0	0	0	0	0	0	0.118924	0	0	0	0	0	0	0	0	0	0	0	0	0	0	0	0	0	0	0	0	0	0	0
Aco009056	0	0	0	0	0	0	0	0	0	0	0	0	0.092077	0	0	0	0	0	0	0	0	0.531927	0	0	0	0	0	0	0	0	3.72942	5.21009	4.76437	0	0	0
Aco016581	0	0	0	0	0	0	0	0	0	0	0	0	0	0	0	0	0	0	0	0	0	0	0	0	0	0	0	0	0	0	0	0	0	4.08302	3.59533	2.84642
Aco016052	0	0	0	0	0	0	0	0	0	0	0	0	0	0	0	0	0	0	0	0	0	0	0	0	0	0	0	0	0	0	0	0	0	0.128462	0	0
Aco021547	0	0	0	0	0	0	0	0	0	0	0	0	0	0	0	0	0	0	0	0	0	0.164149	0	0	0	0	0	0	0	0	0	0	0	0	0	0
Aco029150	0	0	0	0	0	0	0	0	0.111179	0	0	0	0	0	0	0	0	0	0	0	0	0	0	0	0	0	0	0	0	0	0	0	0	0	0	0
Aco002425	0	0	0	0	0	0	0.153109	0	0	0	0	0	0	0	0	0	0	0	0	0	0	0	0	0	0	0	0	0	0	0	0	0	0	0.651968	2.17924	1.01293
Aco006601	0	0	0	0	0	0	0	0	0	0	0	0	0	0	0	0	0	0	0	0	0	0.675799	0	0	0	0	0	0	0	0	0	0	0	0	0	0
Aco025162	0	0	0	0	0	0	0	0	0	0	0	0	0.131053	0	0	0	0	0	0	0	0	0	0	0	0	0	0	0	0	0	0	0	0	0	0	0
Aco014474	0	0	0	0	0	0	0	0	0	0	0	0	0	0	0	0	0	0	0	0	0	0	0	0	0	0	0	0	0	0	0	0	0	0.445451	0.354134	0.435864
Aco023519	0	0	0	0	0	0	0	0	0	0	0	0	0	0	0	0	0	0	0	0	0	1.25315	0	0	0	0	0	0	0	0	0	0	0	0	0	0
Aco005809	0	0	0	0	0	0	0	0	0	0	0	0	0	0	0	0	0	0	0	0	0	0.350305	0	0	0	0	0	0	0	0	0	0	0	0	0	0
Aco025278	0	0	0	0	0	0	0	0	0	0	0	0	0	0	0	0.395137	0	0	0	0	0	0	0	0	0	0	0	0	0	0	0	0	0	0	0	0
Aco020672	0	0	0	0	0	0	0	0	0	0	0	0	0	0	0	0	0	0	0.351912	0	0	0	0	0	0	0	0	0	0	0	0	0	0	0	0	0
Aco009398	0	0	0	0	0	0	0	0	0	0	0	0	0	0	0	0	0	0	0.147732	0	0	0	0	0	0	0	0	0	0	0	0	0	0	0	0	0
Aco015650	0	0	0	0	0	0	0	0	0	0	0	0	0	0	0	0	0	0	0	0.638695	0	0	0	0	0	0	0	0	0	0	0	0	0	0	0	0
Aco025941	0	0	0	0	0	0	0	0	0	0	0	0	0	0	0	0	0	0	0	0	0	0	0	0	0	0	0	0	0.341768	0	0	0	0	0	0	0
Aco022468	0	0	0	0	0	0	0	0	0	0	0	0	0	0	0	0	0	0	0	0	0	0.346281	0	0	0	0	0	0	0	0	0	0	0	0	0	0
Aco031049	0	0	0	0	0	0	0	0	0	0	0	0	0	0	0	0	0	0	0	0	0	0	0	0	0	0	0	0	0	0	0	0	0	0	0	0.117864
Aco013633	0	0	0	0	0.075219	0.070082	0.079844	0.108036	0	0	0.037529	0	0.052075	0	0.111607	0.112972	0	0	0.090126	0.113662	0	16.3789	0.603055	0	0	0	0	0	0	0.046699	0	0.25653	0.09983	0	0	0
Aco024122	0	0	0	0	0	0	0	0	0	0	0	0.108381	0	0	0	0	0	0	0	0	0	0	0	0	0	0	0	0	0	0	0	0	0	0	0	0
Aco024200	0	0	0	0	0	0	0.345239	0.087563	0	0.26601	0	0	0	0	0	0.07388	0	0	93.4862	0.690376	0	0	0	0	0	0	0.259566	0	0	0	0	0	0	3.2044	0.804777	2.35478
Aco007937	0	0	0	0	0	0	0	0	0	0	0	0	0	0	0	0	0	0	0	0	0	0	0	0	0	0	0	0	0	0	0	0	0.150427	0	0	0
Aco031006	0	0	0	0	0	0	0	0	0	0	0	0	0	0	0	0	0	0	0	0	0	0	0	0.193795	0	0	0	0	0	0	0	0	0	0	0	0
Aco014484	0	0	0	0	0	0	0	0	0	0	0	0	0	0	0	0	0	0	0	0	0	0	0	0	0	0	0	0	0	0	0	0	0	0.172779	0.147734	0
Aco011458	0	0	0	1.40212	0	0	123.402	0	0	93.5107	0	0	1.33877	0	0	3.72857	0	0	1.50217	0	5.71336	29668	47.6181	0	0.317639	0.515079	5.30469	0	0	0	1.17038	0.454184	0.526564	1.21662	0	0.274302
Aco020076	0	0	0	0	0	0	0	0	0	0	0	0	0	0	0	0	0	0	0	0	0	0	0	0	0	0	0	0.196818	0	0	0	0	0	0	0	0
Aco002280	0.743959	2.26011	0.103539	0.270465	0.622818	0.110504	0	13.6216	1.0221	0	0.044778	0	0	0.063326	0	0	0.232957	0.331676	0	0	0.604275	0	0	0	0	0	0	0	0.204278	0.065735	0	0.148838	0.15029	69.0029	192.171	71.7334
Aco002290	0.084171	0	0	0	0	0	0	0	0	0	0	0	0	0	0	0.15856	0	0	0	0	0	60.0404	2.64637	0	0	0	0	0	0	0	0	0	0	0	0	0
Aco012134	0	0	0	0	0	0	0	0	0	0	0	0	0	0	0	0	0	0	0	0	0	0	0	0	0	0	0	0	0	0	0	0.594107	0.39207	0	0	0
Aco003955	0	0	0	0	0	0	0	0	0	0	0	0	0	0	0	0.154135	0	0	0	0	0	0	0	0	0	0	0	0	0	0	0	0	0	0	0	0
Aco027929	0	0	0	0	0	0	0	0	0	0	0	0	0	0	0	0	0	0	6.15088	1.29052	0	0	0	0	0	0	0	0	0	0	0	0	0	0	0	0
Aco017486	0	0	0	0	0	0	0	0	0	0	0	0	0.195887	0	0	0	0	0	0	0	0	0	0	0	0	0	0	0	0	0	0	0	0	0	0	0
Aco030880	0	0	0	0	0	0	0	0	0	0	0	0	0	0	0	0	0	0	0	0	0	0	0	0	0	0.155663	0	0	0	0	0	0	0	0	0	0
Aco021723	0	0	0	0	0	0	0	0	0	0	0	0	0	0	0	0	0	0	0	0	0	0	0	0	0	0	0	0	0	0	0	0	0.299476	0	0	0
Aco027719	0	0	0	0	0	0	0	0	0	0	0	0	0	0	0	0	0	0	0	0	0	0.210335	0	0	0	0	0	0	0	0	0	0	0	0	0	0
Aco029097	0	0	0	0	0	0	0	0	0	0	0	0.445626	0	0	0	0	0	0	0	0	0	0	0	0	0	0	0	0	0	0	0	0	0	0	0	0
Aco021946	0.206136	0.428925	0.756814	0.549387	0.289905	1.4527	0	0	0	0	0.208287	0	0.229326	0	0	0.243311	0	0	0	0	0	0.384209	0	0	0	0.298389	0	0	0	0	61.9143	98.4577	112.359	0.1672	0.08366	0.222313
Aco006155	0	0	0	0	0	0	0.107447	0	0	0.155317	0	0	0	0	0	0	0	0	0	0	0	166.125	6.39544	0	0	0	0	0	0	0	0	0	0	0	0	0
Aco025839	0	0	0	0	0	0	0	0	0	0	0	0	0	0	0	0	0	0	0	1.26843	0	0	0	0	0	0	0	0	0	0	0	0	0	0	0	0
Aco022501	0	0	0	0	0	0	0	0	0	0	0	0	0	0	0	0	0	0	0	0	0	0	0	0	3.46236	0	0	0	0	0	0	0	0	0	0	0
Aco029320	0	0	0	0	0	0	0	0	0	0	0	0	0	0	0	0	0	0	0	0	0	0	0	0	0	0	0	0	0	0	0	0	0	0	0	0.19152
Aco006656	0	0	0	0	0	0	0	0	0	0	0	0	0	0	0	0	0	0	0	0	0	0	0	0	0	0	0	0	0	0	0	0	0	0	0.113647	0
Aco014867	0	0	0	0	0	0	0	0.520115	0	0	0	0	0	0	0	0	0	0	28.0453	6.08462	0	0	0	0	0	0.691831	0	0	0	0	0	0	0	0	0	0
Aco013621	2.51417	2.45363	8.16937	3.37745	3.76807	8.01317	0	0	0	0	0	0	0	0	0	0	0	0	0.201128	0	0	0	0.350545	0	0	0	0	0	0	0	163.957	166.299	129.719	0.493047	0	0
Aco012293	0	0	0.067124	0.154181	0	0	0	0	0	0	0	0	0.544154	0	0	0.29315	0	0	0	0	0	22.9892	0.599161	0	0	0	0	0	0	0	0	0	0	0	0	0
Aco029558	0	0	0	0	0	0	0	0	0	0	0	0	0	0	0	0	0	0	0	0	0	0	0	0	0	0	0	0	0	0	0	0	0.101949	0	0	0
Aco029179	0.151138	0	0	0	0	0	0	0	0	0	0	0	0	0	0	0	0	0	0	0	0	0	0	0	0	0	0	0	0	0	0	0	0	0	0	0
Aco031860	0	0.067836	0.198859	0	0	0.163326	0	0	0	0	0	0	0	0	0	0	0	0	0	0	0	0	0	0	0	0	0	0	0	0	1.92898	3.92454	5.96233	0	0	0
Aco005612	0	0	0	0	0	0	0	0	0	0	0	0	0	0	0.201366	0.377323	0	0	0	0.180424	0	0	0	0	0	0	0.218361	0	0	0	0	0	0	8.67989	8.87945	9.65113
Aco022557	0	0	0	0.861424	0	0	0	0	0	0	0	0	0	0	0	0	0	0	0	0	0	0	0	0	0	0	0	0	0	0	0	0	0	0	0	0
Aco020007	0	0	0	0	0	0	0	0	0	0	0	0	0	0	0	0	0	0	0	0	0	0	0	0	0	0	0	0	0	0	0.117608	0	0	0	0	0
Aco028832	0	0	0	0	0	0	0	0	0	0	0	0	0	0	0	0	0	0	0.164912	0	0	0	0	0	0	0	0	0	0	0	0	0	0	0	0	0
Aco025150	1.14824	0.501618	0.835982	0.59441	0	0.472068	0	0.248971	0.103424	0.266978	0	0.119119	0	0	0	0	0	0	0	0	0	0	0.263957	0.162076	0	0	1.40126	0.251487	0	0.478108	0.191483	0.202318	0.911354	102.919	74.3792	73.8887
Aco017966	0	0	0	0	0	0	0	0	0	0	0	0	0	0	0	0	0	0	0	0	0	0	0	0	0	0	0	0	0	0	0	0.158719	0	0	0	0
Aco021336	0	0	0	0	8.56469	0	0	0	0	0	0	0	0	0	0	0	0	0	0	0	0	0	0	0	0	0	0	0	0	0	0	0	0	0	0	0
Aco004790	0	0	0	0	0	0	0	0	0	0	0	0	0	0	0	0	0	0.277318	0	0	0	0	0	0	0	0	0	0	0	0	0	0	0	0	0	0
Aco010329	0	0	0	0	0	0	0	0	0	0	0	0	0	0	0	0	0	0	0	0	0	37.581	0	0	0	0	0	0	0	0	0	0	0	0	0	0
Aco027336	0	0	0	0	0	0	0	0	0.197813	0	0	0	0	0	0	0	0	0	0	0	0	0	0	0	0	0	0	0	0	0	0	0	0	0	0	0
Aco017956	0	0	0	0	0	0	0	0	0.161903	0	0	0	0	0	0	0	0	0	0	0	0	0	0	0	0	0	0	0	0	0	0	0	0	0	0	0
Aco008797	0	0	0	0	0	0	0	0	0	0	0	0	0	0	0	0	0	0	0	0	0	0	0	0	0	0	0	0	0	0	0	0.123736	0	0	0	0
Aco026597	0	0	0	0	0	0	0	0	0	0	0	0	0	0	0	0	0	0	0	0	0	0	0	0	0	0	0.38046	0	0	0	0	0	0	0	0	0
Aco001089	77.6711	76.8467	141.906	56.2101	101.024	259.025	3.48443	9.48248	11.6306	11.1314	1.60188	1.9202	1.23596	2.01239	1.15165	1.13392	1.46695	1.68031	5.93064	2.08498	1.87908	9.47794	4.35298	2.32415	0.446848	5.01791	7.26963	0.781733	1.25547	1.49573	1639.44	4165.62	2112.5	2.8664	5.10831	3.78255
Aco013923	0	1.0304	0	0	0	0	0	0	0	0	0	0	0	0	0	0	0	0	0	0	0	0	0	0	0	0	0	0	0	0	0	0	0	0	0	0
Aco001143	2.37379	0.080147	0	1.95683	0	0	4.57147	0	0.067531	3.86726	0	0	2.44844	0.161356	0	7.94898	0	0	0.538569	0	0.408302	1495.69	93.6139	0.949007	0	0	0.42055	0	0.058049	0	0.155502	0	0	0.700464	0	0.471928
Aco016884	0	0	0.067337	0.254205	0	0	0	0	0	0	0	0	0	0	0	0	0	0	0.772711	0	0	0	0	0	0	0	0.872996	0	0	0	9.91211	36.5795	34.2491	0	0.687345	0.845805
Aco022228	1.7358	1.10906	2.31033	0.141631	0	0	0	0	0	0	0	0	0	0	0	0	0	0	0	0	0	0	0	0	0	0	0	0	0	0	0	0	0	0	0	0
Aco024518	0	0	0	0	0	0	0	0	0	0	0	0	0	0	0	0	0	0	0	1.5879	0	0	0	0	0	0	0	0	0	0	0	0	0	0	0	0
Aco030596	0	0.672227	0	0	0	0	0	0	0	0	0	0	0	0	0	0	0	0	0	0	0	0	0	0	0	0	0	0	0	0	0	0	0	0	0	0
Aco030289	0	0	0	0	0	0	0	0	0	0	0	0	0	0	0	0	0	0	0	0	0	0	0	0	0	0.119926	0	0	0	0	0	0	0	0	0	0
Aco021141	0	0	0	0	0	0	0	0	0	0	0.22189	0	0	0	0	0	0	0	0	0	0	0	0	0	0	0	0	0	0	0	0	0	0	0	0	0
Aco028652	0	0	0	0	0	0	0	0	0	0	0	0	0	0	0	0	0.267188	0	0	0	0	0	0	0	0	0	0	0	0	0	0	0	0	0	0	0
Aco026879	0	0	0	0	0	0	0	0	0	0	0	0	0	0	0	0	0	0	0	0	0	0	0	0	0.203068	0	0	0	0	0	0	0	0	0	0	0
Aco007513	0	0	0	0	0	0	0	0	0	0	0	0	0	0	0	0	0	0	0	0	0	0	0	0	0	0	0	0	0	0	0	0	0.241681	0	0	0
Aco004595	0	0	0	0	0	0	0	0	0	0	0	0	0	0	0	0	0	0	0	0	0	0.12549	0	0	0	0	0	0	0	0	0	0	0	0	0	0
Aco002199	0	0.125576	0	0	0	0	0	0	0	0	0	0	0	0	0	0	0	0	0	0	0	0	0	0	0	0	0	0	0	0	0	0	0	0	0	0
Aco007400	0	0	0.062102	0	0	0	0.916258	0	0	0.19032	0	0	0	0	0.088633	0	0	0	0	0	0	159.713	1.16463	0	0	0	0	0	0	0	0	0	0	0.077842	0	0
Aco011857	0	0	0	0	0	0	0	0	0	0	0	0	0	0	0	0	0	0	0	0	0	0.109185	0	0	0	0	0	0	0	0	0	0	0	0	0	0
Aco023039	0	0	0	0	0	0	0	0	0	0	0	0	0	0	0	0	0	0	0.158143	0	0	0	0	0	0	0	0	0	0	0	0	0	0	0	0	0
Aco030362	0	0	0	0	0	0	0	0	0	0	0	0	0	0	0	0	0	0	0	0	0	0	0	0	0	0	0	0	0	0	0	0.101155	0	0	0	0
Aco021984	0	0	0	0	0	0	0	0	0	0	0	0	0	0	0	0	0	0	0	0	0	0	0	0	0	0	0	0	0	0	0	0	0	1.59176	1.63111	2.1567
Aco004981	0	0	0	0	0	0	0	0	0	0	0	0	0	0	0	0	0	0	0	0	0	0	0.516741	0	0	0	0	0	0	0	0	0	0	0	0	0
Aco004709	0	0	0	0	0	0	0	0	0	0	0	0	0	0	0	0	0	0	0	0	0	0	0	0	0	0.206591	0	0	0	0	0	0.16743	0	17.0404	19.891	121.06
Aco005373	0	0	0	0	0	0	0.366793	0	0	0.166962	0	0	0	0	0	0	0	0	0	0	0	253.723	12.0166	0	0	0	0.129024	0	0	0	0	0	0	0	0	0
Aco020143	0	0	0	0	0	0	0	0	0	0	0	0	0	0.068695	0	0	0	0	0	0	0.079192	3.17057	0.204607	0	0	0	0	0	0	0	0	0	0	0	0	0
Aco008507	0	0	0	0	0	0	0	0	0	0	0	0	0	0	0	0	0	0	0	0	0	0	0	0	0	0	0	0	0	0	0	0	0	0	0.250149	0
Aco008623	0	0	0	0	0	0	0	0	0	0	0	0	0	0	0	0	0	0	0	1.69371	0	0	0	0	0	0	0	0	0.183008	0	0	0	0	0	0	0
Aco020642	0	0	0	0	0	0	0	0	0	0	0	0	0	0	0	0	0	0	0	0	0	0	0	0	0	0	0	0	0	0	0	0	0	0	0.155828	0
Aco009735	0.547494	0.143518	0.346588	0.488081	0	0.139561	2.23627	0.511864	0.244383	1.56328	0	0	0.345069	0	0.264429	0	0	0.350278	0.671096	0.258257	0.372453	906.847	0.831091	0.188546	0	0.317153	0	0.499355	0.26754	0.388052	0.661696	0.568136	0.674014	0.199251	0	0.328016
Aco009752	0	0	0	0	0	0	0	0	0	0	0	0	0	0	0	0	0	0	6.15088	1.29052	0	0	0	0	0	0	0	0	0	0	0	0	0	0	0	0
Aco011217	0	0	0	0	0	0	0	0	0	0	0	0	0	0	0	0	0	0	0.192952	0	0	0	0	0	0	0	0	0	0	0	0	0	0	0	0	0
Aco003705	0	0	0	0	0	0	0.155261	0	0	0	0	0	0	0	0	0.730303	0	0	0.157972	0.525975	0.408788	0.608243	0.392923	0	0	0	0	0	0	0	0.490195	0.142009	0.659407	30.1272	14.7608	28.9644
Aco000819	0	0	0	0	0	0	0.10829	0	0	0	0	0	0	0	0	0	0	0	31.9786	0.199433	0	0	0.708023	0	0	0	0	0	0	0	0	0	0	0	0	0
Aco027720	3.27472	2.52351	2.97128	1.52503	0.795129	2.95254	0.163374	2.33801	2.2152	2.54853	3.04838	0.8654	1.20231	2.71917	0.25798	0.345433	1.23591	0.490996	0	0	0.283805	0.838475	1.04048	1.04033	0	1.17252	0	1.49882	4.2348	0.318011	0.71281	2.11671	0.776634	71.2248	67.0836	220.725
Aco030690	0	0	0.029628	0	0	0.049893	0	0	0.349713	0	0	0	0	0	0	0.078646	0.037976	0	0.12896	0	0	0	0.032066	0	0	0	0.060739	0	0.053036	0	0	0	0	3.99496	10.057	9.32461
Aco026935	0	0	0	0	0	0	0	0	0	0	0	0	0.391936	0	0	0	0	0	0	0	0	0	0	0	0	0	0	0	0	0	0	0	0	0	0	0
Aco014635	0	0	0	0	0	0	0	0	0	0	0	0	0	0	0	0	0	0	0	0	0	0	0	0.878284	0	0	0	0	0	0	0	0	0	0	0	0
Aco008192	0.091118	0.094348	0	0.08125	0.175914	0	0.382946	0	0.094363	0.47113	0	0	0.149085	0.139998	0	0.441445	0.172248	0	0.057605	0.367728	0.104693	153.043	5.86033	0.157507	0	0.143124	0.048797	0.040097	0.080465	0	0	0	0	0	0.135071	0.095209
Aco006119	0	0	0	0	0	0	0	0	0	0	0	0	0	0	0	0	0	0	0	0	0	0	0	0	0	0	0	0	0	0	0	0	0	0.267494	0	0
Aco018367	0	0	0	0	0	0	0	0	0	0	0	0	0	0	0	0	0	0	0	0	0	1.02611	0	0	0	0	0	0	0	0	0	0	0	0	0	0
Aco014724	0	0	0	0	0	0	0	0	0	0	0	0	0	0	0	0	0	0	0	0	0	0.416573	0	0	0	0	0	0	0	0	0	0	0	0	0	0
Aco016152	0	0	0	0	0	0	0	0	0	0	0	0	0	0	0	0	0	0	0	0	0	0	0	0	0	0	0	0	0	0	0.119416	0	0	0	0	0
Aco004263	0	0	0	0	0	0	0	0	0	0	0	0	0	0	0	0	0	0	0	0	0	56.0078	0.496712	0	0	0	0	0	0	0	0	0	0	0	0	0
Aco014754	0	0	0	0	0	0	0	0	0	0	0	0	0	0	0	0	0	0	0	0	0	0	0	0	0	0	0	0	0	0	0	0	0	0.243696	0	0.625982
Aco025641	0	0	0	0	0	0	0	0	0	0	0	0	0	0	0	0	0	0	0	0	0	0	0	0	0	0	0	0	0	0	0.434096	0.520279	2.21506	0	0	0
Aco009114	0	0	0	0	0	0	0	0	0	0.661652	0	0	0	0	0	0	0	0	0	0	0	0	0	0	0	0	0	0	0	0	0	0	0	0	0	0
Aco007477	0	0	0	0	0	0	0	0	0	0	0	0	0	0	0	0	0	0	0	0	0	0.240068	0	0	0	0	0	0	0	0	0	0	0	0	0	0
Aco026506	0	0.065293	0.098246	0.054821	0.19011	0	0	0	0	0	0	0	0	0	0	0	0	0	0	0	0	0	0	0	0	0	0	0	0	0	2.51832	5.61578	12.2623	0	0	0
Aco029903	0	0	0	0	0	0	0	0	0	0	0	0	0	0	0	0	0	0	0	0	0	0.239682	0	0	0	0	0	0	0	0	0	0	0	0	0	0
Aco007510	0	0	0	0	0	0	0	0	0	0	0	0	0	0	0	0	0	0	0	0	0	0.256517	0	0	0	0	0	0	0	0	0	0	0	0	0	0
Aco028219	0	0	0	0	0	0	0	0	0	0	0	0	0	0	0	0	0	0	0	0	0	0	0	0	0	0	0	0	0	0	0.125157	0	0	0	0	0
Aco004818	0	0	0	0	0	0	0	0	0	0	0.472474	0	0	0	0	0	0	0	0	0	0	0	0	0	0	0	0	0	0	0	0	0	0	0	0	0
Aco022941	5.044	0.136847	0.665489	4.72651	2.00638	0.162071	14.4096	1.41111	2.58855	4.93846	0	0.572861	9.38158	0.563568	2.91934	17.3658	0.80213	0.679877	8.0216	0.435219	0.096063	2018.72	160.485	5.34219	2.27251	0	1.99849	1.42308	6.55875	5.75166	0.684526	2.04424	3.07905	14.0744	8.99205	14.7981
Aco029819	0	0	0	0	0	0	0	0	0	0	0	0	0	0	0	0	0	0	0	0.199643	0	0	0	0	0	0	0	0	0	0	0	0	0	0	0	0
Aco031801	0	0	0	0	0	0	0	0	0	0	0	0	0	0	0	0	0	0	0	0	0	1.22481	0	0	0	0	0	0	0	0	0	0	0	0	0	0
Aco011691	0.253699	0	0	0	0	0	0	0	0	0	0	0.118717	0	0	0	0.158156	0	0	0	0	0	67.8226	4.43267	0	0	0	0	0.353341	0	0	0	0	0	0	0.101338	0
Aco024976	0	0	0	0	0	0	0	0	0	0	0	0	0	0	0	0	0	0	0	0	0	0	0	0	0	0	0	0	0.390844	0	0	0	0	0	0	0
Aco030376	1.95279	0	0	1.1411	0	0	3.0944	0	0	3.0354	0	0	1.25191	0	0	6.15147	0	0	1.24835	0.132963	0	601.242	36.9026	1.55555	0	0	0.292561	0	0	0	0.303064	0.126946	0.292298	0.780124	0	0.22463
Aco013203	0.27325	0	0.297846	0	0.18679	0	0	0.24704	0.428679	0	0	0	0	0.358154	0.16833	0	0	0	0	0.158302	0	1.76116	0	0	0	0.109835	0	0.181974	0.170488	0.008861	0.170741	0	0.127608	46.1702	40.8173	46.654
Aco006830	0	0	0	0	0	0	0	0	0	0	0	0	0	0	0	0	0	0	0	0	0	0.256608	0	0	0	0	0	0	0	0	0	0	0	0	0	0
Aco019343	0	0.249129	0	0	0	0	0	0	0	0	0	0	0	0	0	0	0	0	0	0	0	0	0	0	0	0	0	0	0	0	0	0	0	0	0	0
Aco003745	0	0	0	0	0	0	0	0	0	0	0	0	0	0	0	0	0	0	0	0	0	0	0	0	0	0	0	0	0.357247	0	0	0	0	0	0	0
Aco007500	0	0	0	0	0	0	0.352186	0	0.083845	0	0	0	0	0	0	0	0	0	0	0	0	24.8048	0	0	0.094586	0	0	0	0	0	0	0	0	0	0	0
Aco003055	0	0	0	0	0	0	0	0	0	0	0	0	0	0	0	0	0	0	0	0	0	0	0	0	0	0	0	0	0	0	0	0	0	0	0.337671	0
Aco027873	0	4.27189	0	0	0	0	0	0	0	0	0	0	0	0	0	0	0	0	0	0	0	0	0	0	0	0	0	0	0	0	0	0	0	0	0	0
Aco008382	0.215716	0.269962	0	0.25532	0	0	0	0	0	0	0	0	0	0	0	0	0.140858	0	0	0	0	0	0	0	0	0	0	0	0	0	0	0	0	46.4923	16.8774	26.516
Aco026312	0	0	0	0	0	0	0	0	0	0	0	0	0	0	0	0	0	0	0	0	0	0	0	0	0	0	0	0	0	0	0	0	0.209343	0	0	0
Aco007470	0	0	0	0	0	0	0	0	0	0	0.349722	0	0	0	0	0	0	0	0	0	0	0	0	0	0	0	0	0	0	0	0	0	0	0	0	0
Aco023935	0	0.301736	1.25998	0	0	0	0	0	0	0	0	0	0	0	0	0	0	0	0	0	0	0	0	0	0	0	0	0	0	0	3.70843	3.8047	10.8942	0	0	0
Aco007252	0.088376	0.175887	0	0	0	0	0.062447	0.069784	0.062876	0.235509	0	0	0	0	0	0	0	0	0	0	0	93.5322	1.22053	0	0	0	0	0	0	0	0	0	0.043167	0	0	0.063457
Aco014456	0.281918	0.391864	0.514802	0.477707	0.353834	0.546679	0.300202	0.400834	0.199126	0.119436	0.134382	0.485292	0.38315	0.091264	0.278648	0.185446	0.859577	0.547032	0.710618	0.657692	0.489225	74.9968	0.788608	0.258947	0.121748	0.601497	0.253124	0	0.513672	0.200798	0.783289	0.743373	0.484528	0.646211	0.174012	0.550465
Aco023815	0.922887	0.07137	0	0	0	0	1.24781	0	0.063441	1.44696	0	0	0.625782	0	0	1.06516	0	0	0.249145	0	0	157.984	7.65861	0.746639	0	0	0	0	0	0	0	0	0.338248	0.101956	0	0.04454
Aco006877	0	0	0.158767	0.144923	0	0	0	0.383078	0.16865	0	0	0	0	0	0	0	0	0	0	0	0	0	0	0	0	0	0.134346	0.28608	2.34248	2.05633	0	0	0	67.7036	102.538	143.08
Aco017328	0	0	0	0	0	0	0	0	0	0.060443	0	0	0	0	0	0	0	0	0	0	0	10.0799	0.256586	0	0	0	0.060031	0	0	0	0	0	0	0	0	0
Aco020742	0	0	0.785739	0	0	0	0	0	0	0	0	0	0	0	0	0	0	0	0	0	0	0	0	0	0	0	0	0	0	0	0	0	0	0	0	0
Aco019154	0	0	0	0	0	0	0	0	0	0	0	0	0	0	0	0	0	0	0	0	0	0	0	0	0	0	0.143174	0	0	0	0	0	0	0	0	0
Aco031539	0	0	0	0	0	0	0	0	0	0	0	0	0	0	0	0	0	0	0	0	0	0	0	0	0	0	0	0	0	0	0	0	0	0	0	0.485779
Aco014522	0.186361	0.607686	0.220215	0.186975	0.282308	0.308849	0	0	0	0	0	0.1632	0	0	0	0	0	0	0.153642	0.140871	0.18993	0.146682	0	0	0	0	0.109185	2.61099	10.5793	7.67659	0.463351	0.07408	0	195.618	238.358	307.971
Aco021035	0	0	0	0	0	0	0	0	0	0	0	0	0	0	0	0	0	0	0	0	0	1.44839	0	0	0	0	0	0	0	0	0	0	0	0	0	0
Aco015289	0	0	0	0	0	0	0	0	0	0	0	0	0	0	0	0	0	0	0	0	0	0	0	0	0	0	0	0	0	0	0	0	0	1.95096	2.14208	2.66306
Aco023619	0	0	0	0	0	0	0	0	0	0	0	0	0.09236	0	0	0	0	0	0.065917	0	0	2.10787	0	0	0	0	0	0	0	0	0	0	0	0	0	0
Aco014757	0	0	0	0	0	0	0	0	0	0	0	0	0	0	0	0	0	0	0	0	0	0	0	0	0	0	0	0	0	0	0	0	0	0	2.14768	0
Aco024649	0	0	0	0	0	0	0	0	0	0	0	0	0	0	0	0	0	0	0	0	0	0.808901	0	0	0	0	0	0	0	0	0	0	0	0	0	0
Aco001008	0.243728	0.198256	1.7795	0.502367	0.23455	0.873994	0	0	0	0	0	0	0	0	0	0	0	0	0	0	0	2.4188	0	0	0	0	0	0	0	0	33.1668	66.5403	79.8149	0	0.200291	0
Aco018382	0	0	0	0	0	0	0.25978	0	0	0	0	0	0	0	0	0	0	0	0	0	0	0	0	0	0	0	0	0	0	0	0	0	0	0	0	0
Aco020207	0	0	0	0	0	0	0	0	0	0	0.045396	0	0	0	0	0	0	0	0	0	0	0	0	0	0	0	0	0	0	0.059958	0	0	0	1.51894	0	0
Aco017730	0.170706	0.204594	0	0	0.140665	0	0	0	0.156451	0	0.173827	0	0	0	0	0	0	0.158044	0.801308	0.17436	0	0	0	0.713082	0	0	0	0.243919	0.329839	0	0.169485	0.422602	0.475113	27.2199	9.73715	13.2273
Aco025924	0	0	0	0	0	0	0	0	0	0	0	0	0	0	0	0	0	0	0	0	0	0.707335	0	0	0	0	0	0	0	0	0	0	0	0	0	0
Aco017119	0	0	0	0	0	0	0	0	0	0	0	0	0	0	0	0	0	0	0.313372	0	0	0	0	0	0	0	0	0	0	0	0	0	0	0	0	0
Aco019515	0.00685	0	0	0	0	0	0	0	0	0	0	0	0	0	0	0	0.193615	0	0	0	0	0	0	0	0	0	0	0	0	0	0	0	0	0	0	0
Aco013520	4.5128	3.16166	2.66245	0.763403	0.211711	1.53953	0	0.287263	5.4682	0	0	0	0.130003	0	0	0	0	0	0	0.714478	0.376352	0.154645	1.87997	0	0	0	0.329873	0	0	0	0.241296	1.27584	3.83028	328.185	378.464	258.264
Aco019759	0	0	0	0	0	0	0	0	0	0	0	0	0	0	0	0	0	0	0	0	0	0	0	0	0	0	0	0	0	0	0	0	0.116649	0	0	0
Aco001898	0	0	0	0	0	0	0	0	0	0	0	0	0	0	0	0	0	0	0	0	0	0	0	0	0	0	0	0	0	0	0	0	0	0	0.350485	0.510571
Aco010479	0	0	0	0	0	0	0	0	0	0	0	0	0	0	0	0	0	0	0	0	0	0	0	0	0	0	0	0	0	0	0	0	0	0.38912	0.223884	0.581653
Aco016887	0	0	0	0	0	0	0	0	0	0	0	0	0	0	0	0	0	0	0	0	0	0	0	0	0	0	0	0.669746	0	0	0	0	0	0	0	0
Aco001285	1.68189	0	0.891432	0.411374	0.412412	0.208944	0	0	0	0	0	0	0.150663	0.805334	0	0	1.21165	0.174511	0	0	0	0	0	10.2199	0.821492	0.93649	0	0.222557	0	0.13805	0.721571	1.2024	2.53042	165.844	56.6706	88.8542
Aco008359	0	0	0	6.31127	0	0	8.76828	0.638134	0	9.81521	0	0	1.75361	0	0	4.72879	0	0	334.145	44.3734	0	10.0215	1.44693	0	0	0	0	0	0	0	0	0	0	0	0	0
Aco001822	2.60759	0.184294	0	1.01877	0.304684	0	3.36946	0	0	2.9076	0	0	1.3551	0	0	4.35768	0.066147	0	0.716976	0	0	984.004	53.5759	1.34834	0	0	0.055374	0	0	0	0.094587	0	0	0.749679	0.068092	0.164412
Aco028344	0	0	0	0	0	0	0	0	0	0	0	0	0	0	0.297081	0	0	0	0	0	0	0	0	0	0	0	0	0	0	0	0	0	0	0	0	0
Aco030955	0	0	0	0	0	0	0	0	0	0	0	0	0	0.180883	0	0	0	0	0	0	0	0	0	0	0	0	0	0	0	0	0	0	0	0	0	0
Aco007116	0.378338	0.09857	0	0.253835	0.080632	0	0.103621	0	0	1.02615	0.080562	0.071794	0	0	0	0.170873	0	0	0	0	0.146784	1076.81	51.6678	0.545272	0.299022	0	0.176868	0	0.080848	0	0	0	0.062508	0	0	0
Aco026929	0	0	0	0	0	0	0	0	0	0	0	0	0.507571	0	0	0	0	0	0	0	0	0	0	0	0	0	0	0	0	0	0	0	0	0	0	0
Aco006061	0	0	0	0	0	0	0	0	0	0	0	0	0	0	0	0	0	0	0	0	0	1.14147	0.048423	0	0	0	0	0	0	0	0	0	0	0	0	0
Aco026961	0	0	0	0	0	0	0	0	0	0	0	0	0	0	0	0	0	0	0	0	0	0	0	0	0	0	0	0	0	0	0	0	0	2.37675	1.10081	1.44287
Aco030784	0	0	0	0	0	0	0	0	0	0	0	0	0	0	0.136644	0	0	0	0	0	0	0	0	0	0	0	0	0	0	0	0	0	0	0	0	0
Aco029586	0.851939	0	0.511189	2.23962	0	1.42451	0	0	0	0	0	0	0	0	0	0	0	0	0	0	0	0	0	0	0	0	0	0	0	0	34.7053	25.9716	31.2819	0	0	0
Aco022757	0	0.934889	1.83213	0	0	0	0	0	0	0	0	0	0	0	0	0	0	0	0	0	0	0	0	0	0	0	0	0	0	0	0	0	0	0	0	0
Aco010346	0	0	0	0.434193	0	0	0	0	0	0	0	0	0	0	0	0.430033	0	0	0	0.241254	2.14914	415.201	21.0269	0	0	0	0	0	0	0	0	0	0	0	0	0
Aco029752	0	0	0	0	0	0	0	0	0	0	0.288281	0	0	0	0	0	0	0	0	0	0	0	0	0	0	0	0	0	0	0	0	0	0	0	0	0
Aco022930	0	0.574811	0.055362	0	0	0	0	0	0	0	0	0	0	0	0	0	0	0	0	0	0	0	0	0	0	0	0	0	0	0	0	0	0	0	0	0
Aco025055	0	0	0	0	0	0	0	0	0	0	0	0	0	0	0	0	0	0	0	0	0	0	0	0	0	0	0	0	0	0	0	0	0	0.124675	0.041919	0
Aco000620	0	0	0	0	0	0	0	0	0	0	0	0	0	0	0	0.271603	0	0	1.39673	3.71443	0	0	0	0	0	0	0	0	0	0	0	0	0	0	0	0
Aco026940	0	0	0	0	0	0	0	0	0	0	0	0	0	0	0	0	0	0	0	0	0	0	0	0.143962	0.314376	0	0	0	0	0	0	0	0	0	0	0
Aco001136	0	0	0	0	0	0	0	0	0	0	0	0	0	0	0	0	0	0	0	0.5046	0	0	0	0	0	0	0	0	0	0	0	0	0	0	0	0
Aco021820	0	0	0	0	0	0	0	0	0	0	0	0	0	0	0	0	0	0	0	0	0	0	0	0	0	0	0	0	0	0	0	0	0	0	0.147679	0
Aco028021	0	0	0	0	0	0	0	0	0	0	0	0	0	0	0	0	0	0	0	0	0	0	0	0	0	0	1.68195	0	0	0	0	0	0	0	0	0
Aco016022	0.217857	0	0.134112	0	0.238397	0.52529	0	0.141984	0.143061	0	0	0	0.121151	0	0	0.159392	0	0	0	0	0.259777	0.282777	0.592868	0	0	0	0.179401	0.475902	0.324294	0.200201	31.3955	17.8159	32.4708	0	0.429345	0.31548
Aco016165	0	0	0	0	0	0	0	0	0	0.142876	0	0	0.133015	0	0	0	0	0	4.62147	2.7161	0	155.71	10.1633	0	0	0	0	0	0	0	0	0	0.064534	0.231204	0	0
Aco031876	0	0	0	0	0	0	0	0	0	0	0	0	0	0	0	0	0	0	0	0	0	0.588965	0	0	0	0	0	0	0	0	0	0	0	0	0	0
Aco020476	0	0	0.23433	0	0	0	0	0	0	0	0	0	0	0	0	0	0	0	0	0	0	0	0	0	0	0	0	0	0	0	0	0	0	0	0	0
Aco028893	0	0	0	0	0	0	0	0	0	0	0	0	0	0	0	0	0	0	0	0	0	0	0	0	0	0	0	0	0.262967	0	0	0	0	3.89053	7.0097	5.6451
Aco017399	0	0	0	0	0	0	0.166559	0	0	0	0	0	0	0	0	0	0	0	0	0	0	0	1.72996	0	0	0	0	0	0	0	0	0	0	0	0	0
Aco002225	0	0	0	0	0	0	0	0	0	0	0	0	0	0	0	0	0	0	0	0	0	0	0	0	0	0	2.75522	0	0	0	0	0	0	0	0	0
Aco026833	0	0	0	0	0	0	0	0	0	0	0	0	0	0	0	0	0	0	0	0	0	0	0	0	0	0	0	0	0	0	0	0	0	0.616999	0	0
Aco016222	0	0	0	0	0	0	0	0	0	0	0	0	0	0	0	0	0	0	0	0	0	0.273672	0	0	0	0	0	0	0	0	0	0	0	0	0	0
Aco001789	0	0	0	0	0	0	0	0	0	0	0	0	0	0	0	0	0	0	0	0	0	0	0.372876	0	0	0	0	0	0	0	0	0	0	0	0	0
Aco002420	0	0	0	0	0	0	0	0	0	0	0	0	0	0	0	0	0	0	0	0.282425	0	0	0	0	0	0	0	0	0	0	0	0	0	3.28099	4.02158	0.723315
Aco026553	0	0	0	0	0	0	0	0	0	0	0	0	0	0	0	0.2588	0	0	0	0	0	0	0	0	0	0	0	0	0	0	0	0	0	0	0	0
Aco010524	2.72931	0	2.71991	5.31057	0.633588	3.70231	0	0.203873	0	0	0	0	0	0	0	0.333434	0.283484	0	0.504273	0	0	0	1.03618	0	0	0	0	0	0	0	75.3566	116.409	155.952	0	0	0.316193
Aco029522	0	0	0	0	0	0	0	0	0	0	0	0	0	0	0	0	0	0	0	0	0	0	0	0	0	0	0	0	0	0	0.178551	0	0	0	0	0
Aco027742	0.095681	0	0	0	0	0	0	0	0	0	0	0	0	0	0	0	0	0	0	0	0	0	0	0	0	0	0	0	0	0	0	0	0	12.1761	8.29878	6.37014
Aco020233	0	0	0	0	0	0	0	0	0	0	0	0	0	0	0	0	0	0	0	0	0	0	0	0	0	0	0	0	0	0	0	0.519585	0	0	0	0
Aco028529	0	0	0	0	0.113794	0	0	0	0	0	0	0	0	0	0	0	0	0	0	0	0	0	0	0	0	0	0	0	0	0	0	0	0	0	0	0
Aco025939	0	0	0	0	0	0	0	0	0	0	0	0	0	0	0	0	0	0	0	0	0	0	0	0	0	0	0	0	0.914853	0	0	0	0	0	0	0
Aco027888	0	0	0	0	0	0	0	0	0	0	0	0	0	0	0	0	0	0	0	0	0	0	0	0	0	0	0	0	0	0	0	0	0	0	0.243918	0
Aco019705	0	0	0	0	0	0	0	0.55586	0	0	0	0	0	0	0	0	0	0	0	0	0	0	0	0	0	0	0	0	0	0	0	0	0	0	0	0
Aco026571	6.93778	3.8793	8.13274	1.54896	0.743404	2.63301	0	0.998804	10.5601	0	0.109239	0	0.244326	0	0	0.135072	0.12297	0	0.251762	2.08915	0.231241	0.165266	1.76845	0	0.135679	0	0	0	0	0	0.93373	2.58677	6.85888	689.804	834.851	579.431
Aco005882	0	0	0	0	0	0	0	0	0	0	0	0	0	0	0	0	0	0	0	0	0	1.19419	0	0	0	0	0	0	0	0	0	0	0	0	0	0
Aco018709	0	0	0	0	0	0	0	0	0	0	0	0	0	0	0	0	0	0	0	0	0	0	0	0	0	0	0	0	0	0	0	0.144456	0	0	0	0
Aco029142	0	0.916828	1.69004	0.409069	0	0.299423	0	0	0	0	0	0	0	0	0	0	0.252744	0	0	0	0	0	0	0	0	0	0	0	0	0	30.3496	33.3881	39.8188	0	0	0
Aco028669	0	0	0	0	0	0	0	0	0	0	0	0	0	0	0	0	0	0	0	0	0	0	0	0	0	0	0	0	0	0	1.16841	1.49062	3.70428	0	0	0
Aco023961	0	0	0	0	0	0	0	0	0	0	0	0	0	0	0	0	0	0	0	0	0	0	1.09532	0	0	0	0	0	0	0	0	0	0	0	0	0
Aco010188	0	0	0	0	0	0	0	0	0	0	0	0	0	0	0	0	0	0	0	0	0	0	0.371384	0	0	0	0	0	0	0	0	0	0	0	0	0
Aco003799	0	0	0	0	0	0	0	0	0	0	0	0	0	0	0	0	0	0	0	0	0	11.0569	0	0	0	0	0	0	0	0	0	0	0	0	0	0
Aco023419	0	0	0	0.355876	0.307882	0	0	0	0	0	0	0	0	0	0	0	0	0	0.611278	0	0	39.6269	2.19173	0	0	0	0.450363	0	0	0	0	0	0	0	0	0
Aco009599	3.45913	0	3.13731	4.8331	0.34036	3.05352	0.455133	0	0	0	0	0	0	0	0	0	0	0	0.182655	0	0	0	0	0	0	0	0.602885	0	0	0	78.7972	75.2545	92.7717	0	0	0.137477
Aco015845	0	0	0	0	0	0	0	0	0	0	0	0	0	0	0	0	0	0	0.159864	0	0	4.66987	0	0	0	0	0	0	0	0	0	0	0	0	0	0
Aco024460	0	0	0.181811	0	0	0	0	0	0	0	0	0	0	0	0	0	0	0	0	0	0	0	0	0	0	0	0	0	0	0	0	0	0	0	0	0
Aco030204	0	0	0	0	0	0	0.309043	0	0	0	0	0	0	0	0	0	0	0	0	0	0	0	0	0	0	0	0	0	0	0	0	0	0	0	0	0
Aco030792	0	0	0	0	0.014103	0	0	0	0	0	0	0	0	0	0	0	0	0	0	0	0	0	0	0	0	0	0	0	0	0	0	22.1635	0	0	0	0
Aco021779	0	0	0	0	0	0	0	0	0	0	0	0	0	0	0	0	0	0	0	0	0	3.54501	0.332756	0	0	0	0	0	0	0	0	0	0	0	0	0
Aco020509	0	0	0	0	0	0	0	0	0	0	0	0	0	0	0	0	0	0	0	0	0	2.23629	0	0	0	0	0	0	0	0	0	0	0	0	0.136368	0
Aco007369	0	0.639266	0.132076	0	0	0	0	0	0	0	0.082876	0	0	0	0	0	0	0	0	0	0.129346	3.86136	0	0	0	0	0	0	0	0	39.0679	30.9477	68.5626	0	0.102553	0
Aco022892	0	0	0	0	0	0	0	0	0	0	0	0	0	0	0	0	0	0	0	1.23292	0	0	0	0	0	0	0	0	0	0	0	0	0	0	0	0
Aco018914	0	0	0	0	0	0	0	0	0	0	0	0	0	0	0	0	0.107631	0	0	0	0	0	0	0	0	0	0	0	0	0	0	0	0	0	0	0
Aco017703	0	0	0	0	0	0	0	0	0	0	0	0	0	0	0	0	0	0	0	0	0.016054	0	0	0	0	0	0	0	0	0	0.445896	0	0	0	0	0
Aco015747	0	0	0.016702	0	0	0	0	0	0	0	0	0	0	0	0	0	0	0	0.853377	0.689876	0	0	0	0	0	0	0	0	0	0	12.3566	14.8269	17.4503	0	0.0587	0
Aco000918	0	0	0	0	0	0	0	0	0	0	0	0	0	0	0	0.170204	0	0	0	0	0	0	0	0	0	0	0	0	0	0	0	0	0	0	0	0
Aco030857	0	0	0	0	0	0	0	0	0	0	0	0	0	0	0	0	0	0	0	0	0	0	0	0	0	0	0	0	0	0	0	0	0.158442	0	0	0
Aco023874	0	0	0	0	0	0	0	0	0	0	0	0	0	0	0	0	0	0	0.491488	0	0	0	0	0	0	0	0	0	0	0	0	0	0	0	0	0
Aco001155	0	0	0	0	0	0	0	0	0	0	0	0	0	0	0	0	0	0	0	0	0.066361	25.736	1.13928	0	0.379557	0	0	0.172796	0	1.40981	0	0	0	0.307716	0.218205	0.135826
Aco019186	0	0	0	0	0.305749	0	0	0	0	0	0	0	0	0	0	0	0	0	0	0	0	0	0	0	0	0	0	0	0	0	0	0	0	0	0	0
Aco007988	0.101055	0	0.174987	0	0	0	2.23228	0	0	0.937635	0	0	0	0	0	0	0	0	0	0	0.214265	719.37	8.80279	0	0	0	0.171546	0	0	0	0	0	0	0	0	0.056775
Aco010607	0	0	0	0	0	0	0	0.040187	0	0	0	0	0	0	0	0	0	0	0.029885	0	0	1.35658	0.085896	0	0	0	0	0	0	0	0	0	0	0	0	0
Aco005468	0	0	0	0	0	0	0	0	0	0.203557	0	0	0	0	0	0	0	0	0	0	0	0	0	0	0	0	0	0	0	0	0	0	0	0	0	0
Aco001972	0	0	0	0	0	0	0	0	0	0	0	0	0	0	0	0	0	0	0	0	0	0	0.352451	0	0	0	0	0	0	0	0	0	0	0	0	0
Aco026939	0	0	0	0	0	0	0	0	0	0	0	0	0	0	0	0.100681	0	0	0	0	0	0	0	0	0	0	0	0	0	0	0	0	0	0	0	0
Aco014770	4.71887	3.2235	6.35034	2.10639	2.44063	6.20766	11.895	3.97721	4.96948	6.53084	3.8117	3.99096	5.831	4.79485	5.17537	6.6265	7.86638	8.41951	10.8812	38.5603	14.2516	1694.81	6.81773	3.06623	3.39019	4.0129	5.84336	5.40575	16.723	12.2006	1.86067	3.65349	1.49066	8.19506	8.94389	15.9475
Aco020387	0	0	0	0	0.351179	0	0	0	0	0	0	0	0	0	0	0	0	0	0	0	0	0	0	0	0	0	0	0	0	0	0	0	0	0	0	0
Aco006010	0	0	0	0	0	0	0	0	0	0	0	0	0	0	0	0	0	0	0	0	0	0	0	0	0	0	0	0	0	0	0	0	0	0	0	0.426081
Aco025942	0	0	0	0	0	0	0	0	0	0	0	0	0	0	0	0	0	0	0	0	0	0	0	0	0	0	0	0	0	0	0	0	0	0	0.349671	0
Aco020485	0	0	0	0	0	0	0	0	0	1.15241	0	0.634675	0	0	0	0	0	0	0	0	0	0	0	0	0	0	0	0	0	0	0	0	0	0	0	0
Aco016155	0	0	0	0	0	0	0	0	0	0	0	0	0	0	0	0	0	0	0	0	0	0	0	0	0	0	0	0	0.371805	0	0	0	0	0	0	0
Aco018745	0	0	0	0	0	0	0	0	0	0	0	0	0.214956	0	0	0.299358	0	0	290.4	0	0	0	3.02643	0	0	0	0	0	0	0	0	0	0	0	0	0
Aco000227	0	0	0	0	0	0	0	0	0	0	0	0	0	0	0	0	0	0	0	0	0	10.3935	0	0	0	0	0	0	0	0	0	0	0	0	0	0
Aco000528	0	0	0	0	0	0	0	0	0	0	0	0	0	0	0	0	0	0	0	0	0	0.984796	0	0	0	0	0	0	0	0	0	0	0	0	0	0
Aco007944	0	0	0	0.429888	0	0	0	0	0	0	0	0	0	0	0	0	0	0	0	0	0	0	0	0	0	0	0	0	0	0	0	0	0	0	0	0
Aco019618	0	0	0	0	0	0	0	0	0	0	0	0	0	0	0	0	0	0	0	0	0	0.461421	0	0	0	0	0	0	0	0	0	0	0	0	0	0
Aco030698	0	0	0	0	0	0	0	0	0	0	0	0	0	0	0.243916	0	0	0	0	0	0	0	0	0	0	0	0	0	0	0	0	0	0	0	0	0
Aco031415	0	0	0	0	0	0	0	0	0	0	0	0	0	0	0	0	0	0	0	0	0	0	0	0	0	0	0	0	0	0	0	0	0	0.435915	0.204016	2.22481
Aco006923	0.639721	0.462125	0.18637	0.253309	0	0.388995	1.4725	0	0.191293	1.73511	0	0	0.14928	0.430342	0	1.09915	0.2065	0	1.05083	0	0.375114	1183.23	69.6688	0.283049	0	0.52929	0.620652	0	0.188447	0.211137	0.578637	0	0.502924	0.385555	0	2.05371
Aco001907	0	0	0	0	0	0	1.25264	0	0	0.113334	0	0	0	0	0	0	0	0	0.271654	0	0.105128	332.414	0.482142	0	0	0	0	0	0	0	0	0	0	0	0	0
Aco024433	0	0	0	0	0	0	0	0	0	0	0	0	0	0	0	0	0	0	0	0	0	0.390289	0	0	0	0	0	0	0	0	0	0	0	0	0	0
Aco022289	5.05062	0	4.04412	11.1515	0	5.89858	0	0	1.02165	0.49562	0	0.574669	0.446213	0	0	0	0	0	0	0	0.396395	0	0.965877	0	0	0	0.675594	0	0	0	48.6883	256.405	217.52	0	1.30938	0.40467
Aco031088	0	0	0	0	0	0	0	0	0	0	0	0	0	0	0	0	0	0	0	0	0	0	0	0	0	0	0	0	0	0	0	0	0	0	0.46628	0
Aco010313	0	0	0.035904	0	0	0	0.076168	0	0	0.223828	0	0	0.112289	0	0	0	0	0.099549	0.077498	0	0	36.0336	1.64856	0	0	0	0	0	0	0	0	0	0	0.506204	1.1544	0.171396
Aco002998	4.64801	0	5.46093	3.92715	0	8.6796	2.7569	0	1.66752	0.334487	0	0.257607	0.31537	0	0.411304	0.129509	0	0.098041	0.652211	0	0.210398	0.1631	0.683614	0.165284	0	0.086225	0.212377	0	0	0	38.8881	168.051	138.386	0.888552	0.27339	0.759182
Aco028706	0	0	0	0	0	0	0	0	0	0	0	0	0.13027	0	0	0	0	0	0	0	0	0	0	0	0	0	0	0	0	0	0	0	0	0	0	0
Aco013426	0	0	0	0	0	0	0.205637	0	0	0	0	0	0	0	0	0	0	0	0	0	0	0	0	0	0	0	0	0	0	0	0	0	0	0	0	0
Aco018616	0	0	0	0	0	0	0	0	0	0	0	0	0	0	0	0	0	0	0	0	0	1.31019	0	0	0	0	0	0	0	0	0	0	0	0	0	0
Aco020685	0	0.657112	3.04881	0	0	0	0	0.406067	0	0	0	0	0	0	0.332762	0	2.63416	2.42947	1.16848	66.4752	14.075	0	0	0	0	0	0	0	0	0	0	0.800234	1.40588	0	0	0
Aco001464	0.370554	0.799801	0.642708	0	0.164285	0.084667	0	0.157574	0	0.185449	0	0	0	0.758151	0	0	2.60115	0.946141	0	0	0.174034	1.15581	0	0	0.560262	6.45701	0	0.833744	0.430462	0.303053	0	0	0	156.908	62.2626	117.56
Aco031622	0	0	0	0	0	0	0.440019	0	0	0	0	0	0	0	0	0	0	0	0	0	0	0	0	0	0	0	0	0	0	0	0	0	0	0	0	0
Aco007433	0	0	0	0	0	0	0	0	0	0	0	0	0.247614	0	0	0	0.582439	0	0	4.10183	11.206	0	0	0	0	0	0	0	0	0	0	0	0	0	0	0.312151
Aco010765	0	0	0	0	0	0	0	0	0	0	0	0	0	0	0	0	0	0	0	0	0	0	0	0	0	0	0	0	0	0	0.460555	0	0	0	0	0
Aco021941	0	0.261986	0	0	0	0	0	0.324264	0	0	0	0.093666	0	0.153578	0	0.825161	0	0.205827	1.05183	0.694919	1.32597	111.004	7.00305	0.199643	0.782434	0	0.951196	0.499887	0.469488	0	0	0	0	0	0	0
Aco017800	4.97303	0	0	3.24882	0	0	5.01046	0	0	4.56011	0	0	2.2068	0	0	4.50562	0	0	0.847232	0	0.11167	742.096	55.7112	0.963032	0	0	0.424479	0	0	0	0	0	0	0.868546	0	0.846217
Aco001656	0	0	0	0	0	0	0	0	0	0	0	0	0	0	0	0	0	0	0	0	0	0	0	0	0	0	0	0	0	0.166875	0	0	0	0	0	0
Aco025146	0	0	0	0	0	0	0.167045	0	0	0	0	0	0	0	0	0	0	0	0	0	0	0	0	0	0	0	0	0	0	0	0	0	0	0	0	0
Aco005916	0	0	0	0.799605	0	0	0.443444	0	0.369824	0	0.307123	1.50687	0.557907	0	1.19723	0.460672	0	0.226934	1.25816	0.29723	0.629966	166.785	9.4782	0.249957	0	0.14944	1.53318	0	0	0.282925	2.20156	1.34594	1.57582	0.69573	1.43419	1.24911
Aco018052	0	0	0.089011	0	0	0.384797	0	0	0.785256	0	0	0	0	0	0	0	0	0	0	0	0	0	0	0	0	0	0	0	0	0	0	0	0	11.4796	14.9882	3.74508
Aco008872	0	0	0	0	0	0	0	0	0	0	0	0	0	0	0	0	0	0	0	0	0	0	0	0.419459	0	0	0	0	0	0	0	0	0	0	0	0
Aco029624	0	0	0.426511	0	0	0.261765	0	0	0	0	0	0	1.21011	0	0	0.333575	0	0	0	0	0	0	0	0.861033	0	0	0	0.720253	0	0	0	0	0	30.1932	24.4978	13.9732
Aco001214	0	0	0	0	0	0	0	0	0	0	0	0	0	0	0	0	0	0	0	0.303746	0	0	0	0	0	0	0	0	0	0	0	0	0	0	0	0
Aco023239	0	0	0.100855	0	0	0	0	0	0	0	0	0	0	0	0	0	0	0	0	0	0	0	0	0	0	0	0	0	0	0	0	0	0	0	0	0
Aco006793	0	0	0.005298	0	0	0	0	0	0	0	0	0	0	0	0	0	0	0	0	0	0	0	0	0	0	0	0	0	0	0	0	0	0	1.35294	0	0
Aco030586	0	0	0	0	0	0	0	0	0	0	0	0	0	0	0	0	0	0	0	0	0	0	0	0	0	0	0	0	0	0	0	0.518084	0.884079	0	0	0
Aco002333	0	0	0	0	0	0	0	0	0	0	0	0	0	0	0	0	0	0	0	0	0	0	0	0	0	0	0	0	0	0	0	0	0	0	0	0.230629
Aco013165	0.068922	0	0.089523	0	0	0	0	0	0	0	0	0	0	0	0	0	0	0	0.126499	0	0	0	0	0	0	0	0.11456	0	0	0	0	0	0	5.65999	5.40092	1.04496
Aco013438	0	0	0	0	0	0	0	0	0	0	0	0	0	0	0	0	0	0	0	0	0	0	0	0	0	0.135494	0	0	0	0	0	0	0	0	0	0
Aco028142	0.224038	0	0	0	0	0	0	0	0	0	0	0	0	0	0	0	0	0	0	0	0	0	0	0	0	0	0	0	0	0	0	0	0	0	0	0
Aco000898	1.25929	0	0	1.13154	0	0	1.32127	0	0	0.678786	0	0	1.20985	0	0	1.80748	0	0	0.168323	0	0	282.446	22.0685	0.191058	0	0	0.844312	0	0	0	0	0.175611	0	0.288864	0	0.481871
Aco009091	0	0	0	0	0	0	0	0	0	0	0	0	0	0	0	0	0	0	0	0	0	0	0	0	0	0	0	0	0	0	0	0	0.244665	0	0	0
Aco028920	0	0	0	0	0	0	0	0	0	0	0	0	0	0	0	0	0	0	0	0	0	0	0	0.472251	0	0	0	0	0	0	0	0	0	0	0	0
Aco008231	0	0	0	0	0	0	0	0	0	0	0	0	0	0	0	0	0	0	0.519214	0	0	0	0	0	0	0	0	0	0	0	0	0	0	7.12161	4.86962	5.56288
Aco028441	0	0	0	0	0	0	0	0	0	0	0	0	0	0	0	0	0	0	0	0	0	0	0	0	0	0	0	0	0	0	0	0	0	0.318768	1.35701	0.878231
Aco030173	0	0	0	0	0	0	0	0.453714	0	0	0.201406	0	0	0.600905	0	0	0.215965	0	0	156.887	0	5.06602	0.905056	0	0	0	0	0	0	0	0	0	0	0	0	0
Aco011748	0	0	0	0	0	0	0	0	0	0	0	0	0	0	0	0	0	0	0	0	0	2.1579	0	0	0	0	0	0	0	0	0	0	0	0	0	0
Aco030427	0	0	0	0	0	0	0	0	0	0	0	0	0	0	0	0	0	0	0	0	0	0	0	0	0	0	0	0	0	0	0	0	0	0.309456	0.72121	0
Aco027750	0	0	0	0	0	0	0	0	0	0	0	0	0	0	0	0	0	0	0	0	0.390175	0	0	0	0	0	0	0	0	0	0	0	0	0	0	0
Aco028627	0	0	0	0	0	0	0	0	0	0	0	0	0	0	0	0	0	0	0	0	0	0	0	0	0	0	0	0	0	0	0	0	0	0.253063	0	0
Aco030392	0	0	0	0	0	0	0	0	0	0	0	0	0	0	0	0	0	0	3.65931	0	0	0	0	0	0	0	0	0	0	0	0	0	0	0	0	0
Aco022258	0	0	0	0	0.188804	0	0	0	0	0	0	0	0	0	0	0	0	0	0	0	0	0	0	0	0	0	0	0	0	0	0	0	0	0	0	0
Aco013009	0	0	0	0	0	0	0	0	0	0	0	0	0	0	0	0	0	0	0	0	0	0	0	0	0	0	0	0	0.153248	0	0	0	0	0	0	0
Aco015589	0	0	0	0	0	0	0	0	0	0	0.200564	0	0	0	0	0	0	0	0	0	0	0	0	0	0	0	0	0	0	0	0	0	0	0	0	0
Aco022515	0	0	0	0	0	0	0	0	0	0	0	0	0	0	0	0	0	0	0	0	0	0.195654	0	0	0	0	0	0	0	0	0	0	0	0	0	0
Aco003561	0.10059	0	0	0	0	0	0	0	0	0	0	0	0	0	0	0	0	0	0	0	0	0	0	0	0	0	0	0	0	0	0	0	0	0	0	0
Aco010823	0	0	0	0	0	0	0	0	0	0	0	0	0	0	0	0	0	0	0	0	0	0	0	0	0	0	0	0	0	0	0	0	0	0.21311	0	0
Aco017577	0	0	0	0	0	0	0.161848	0	0	0	0	0	0	0	0	0	0	0	2.92512	14.4272	0	0	0.205955	0	0	0	0	0	0	0	0	0	0	0	0	0
Aco026457	0	0	0	0	0	0	0	0	0	0	0	0.21553	0	0	0	0	0	0	0	0	0	0	0	0	0	0	0	0	0	0	0	0	0	0	0	0
Aco027213	0	0	0	0	0	0	0	0	0	0	0	0	0	0	0	0	0.107084	0	0	0	0	0	0	0	0	0	0	0	0	0	0	0	0	0	0	0
Aco003716	0	0.106179	0	0	0	0	0	0	0	0	0	0	0	0	0	0	0	0	0	0	0	0	0	0	0	0	0	0	0	0	0	0	0	0	0	0
Aco003312	8.54522	3.96452	22.2824	4.6103	7.89699	13.8879	1.72903	0	0	0.443784	0	0	0	0	0.196054	0.38783	0	0.167324	1.70638	0	0.132082	1.24331	0.914381	0	0	0	4.0433	0	0	0	717.585	650.43	828.205	1.31866	1.23292	0.447798
Aco013012	1.24868	2.03464	1.47216	0.885363	1.49893	1.79872	0.131461	0	0	0	0	0	0	0	0	0	0	0	0	0.061763	0	0	0	0	0	0	1.15217	0	0.051549	0	163.507	99.9073	136.94	0.168979	0	0.281268
Aco003775	0	0	0	0	0	0	0.072831	0	0	0	0	0	0	0	0	0.110702	0	0	0	0.315019	0	485.225	22.195	0	0	0	0.307892	0	0	0	0	0	0	0	0	0
Aco006242	0.208518	0	0	0	0	0.068021	0	0	0	0	0	0	0	0	0	0	0	0	0	0	0	0.116924	0	0	0	0	0	0	0	0	0	0	0	1.6488	1.33681	3.78017
Aco008629	0	0	0	0	0	0	0	0	0	0	0	0	0	0	0	0	0	0	0	0	0	5.83396	0	0	0	0	0	0	0	0	0	0	0	0	0	0
Aco013933	0	0	0	0	0	0	0	0	0	0	0	0	0	0	0	0	0	0	0	0	0	0	0	0	0	0	0	0	0	0	0	0	0	0.145835	0	0.200582
Aco028491	0	0	0	0	0	0	0	0	0	0	0	0	0	0	0	0	0	0	0	0	0	18.6866	0	0	0	0	0	0	0	0	0	0	0	0	0	0
Aco007678	0	0	0	0	0	0	0	0	0.091559	0	0	0	0	0	0	0	0	0	0	0	0	0	0	0	0	0	1.39888	0.098858	0.163685	0	0	0	0	11.9824	7.96547	13.9283
Aco019217	0.21852	0.776935	1.53851	0	0	0.299553	0	0	0	0	0	0	0	0	0	0.242293	0	0	0	0	0	0	0	0	0	0	0	0.968129	0.441422	0.242365	964.723	324.473	149.928	0	0	0
Aco000880	0.048419	0	0.108537	0	0	0	0.18796	0	0.109438	0.2599	0.049916	0	0	0	0.062379	0.247511	0.062912	0	0.520221	0.127728	0.354992	49.4229	0.761567	0	0	0.379342	0.662154	0	0	0	0	0.11073	0	0.258599	0.172019	0.218105
Aco026568	0	0	0	0	0	0	0.136504	0	0	0	0	0	0	0	0	0	0	0	0	0	0	5.83747	0	0	0	0	0	0	0	0	0	0	0	0	0	0
Aco026990	0	0	0	0.269691	0.407277	0	0	0	0	0	0	0	0	0	0	0	0	0	0	0	0	0	0	0	0	0	0	0	0	0	0	0	0	0	0	0
Aco007242	0	0	0	0	0	0	0	0	0	0	0	0	0	0	0	0	0	0	0	0.452139	0	0	0	0	0	0	0	0	0	0	0	0	0	0	0	0
Aco021169	0	0	0	0	0	0	0	0	0	0	0.343891	0	0	0	0	0	0	0	0	0	0	0	0	0	0	0	0	0	0	0	0	0	0	0	0	0
Aco010704	0	0	0	0	0	0	0	0	0	0	0	0	0	0	0	0	0	0	0	0	0	0.573893	0	0	0	0	0	0	0	0	0	0	0	3.12511	0.91412	5.1852
Aco017835	0	0	0	0	0	0	0	0	0	0	0	0	0	0	0	0	0	0	0	0.182237	0	0	0	0	0	0	0	0	0	0	0	0	0	0	0	0
Aco028421	0	0	0	0	0	0	0	0	0	0	0	0	0	0	0	0	0	0	0	0	0.160612	0	0	0	0	0	0	0	0	0	0	0	0	0	0	0
Aco023340	0	0	0	0	0	0	0	0	0	0	0	0.272085	0	0	0	0	0	0	0	0	0	0	0	0	0	0	0	0	0	0	0	0	0	0	0	0
Aco024570	0	0	0	0	0	0	0	0	0	0	0	0	0	0	0	0	0	0	0	0	0	0	0	0	0	0	0	0	0	0	1.56442	0	0	0	0	0
Aco027701	0.530899	0	1.33142	0	0.128123	0.516796	0	0	0	0	0	0	0	0	0	0	0	0	0	0	0	0	0	0	0	0	0	0	0	0	6.9942	19.9729	16.4976	0	0	0.106141
Aco026927	0	0	0	0	0	0	0	0	0	0	0	0	0	0	0	0	0	0	0	0	0	0	0	0	0	0	0	0	0	0	0	0	0	0	0	0.483468
Aco018271	0	0	0	0	0	0	0	0	0	0	0	0	0	0	0	0	0	0	0	0	0	0	0	0	0	0	0	0	0	0	0	0	0	0.412857	0	0
Aco016131	0	0	0	0	0	0	0	0	0	0	0	0	0	0	0	0	0	0	0	0.338095	0	0	0	0	0	0	0	0	0	0	0	0	0	0	0	0
Aco022370	0	0	0	0	0	0	0	0	0	0	0	0	0	0	0	0	0	0	0	0	0	0.363236	0	0	0	0	0	0	0	0	0	0	0	0	0	0
Aco005268	0	0	0	0	0	0	0	0	0	0	0	0	0	0	0	0	0	0	0	0	0	0	0	0	0	0	0	0	0	0	1.62054	0	0	243.412	154.87	2941.3
Aco021843	0	0.360928	0.816607	0	0	0	0	0	0	0	0	0	0	0	0	0	0	0	0	0	0	0	0	0	0	0	0	0	0	0	0	0	0	0	0	0
Aco017069	0	0	0	0.066047	0	0	0.838281	0	0	0.162536	0	0	0	0	0	0	0	0	0.175972	0.445471	0	220.028	2.43365	0	0	0	0	0	0	0	0	0	0	0.044653	0	0
Aco029109	0	0	0	0	0	0	0	0	0	0	0	0	0	0	0	0	0	0	0	0	0	0.123859	0	0	0	0	0	0	0	0	0	0	0	0	0	0
Aco014792	0	0	0	0	0	0	0	0	0	0	0	0	0	0	0	0	0	0	0	0	0	0.491792	0	0	0	0	0	0	0	0	0	0	0	0	0	0
Aco009537	0	0	0	0	0	0	0	0	0.516653	0	0	0	0	0	0	0	0	0	7.0731	18.281	0	0	0	0	0	0	0	0	0	0	0	0	0	0	0.315737	0
Aco030349	0	0	0	0	0	0	0	0	0	0	0	0	0	0	0	0	0	0	0	0	0	0.226394	0	0	0	0	0	0	0	0	0	0	0	0	0	0
Aco005644	0.057134	0.073573	0	0	0	0	0	0	0	0.062484	0	0	0	0	0	0	0	0.057631	0	0	0	5.2352	0	0	0	0.09063	0	0	0	0	0	0.121205	0	0	0.064628	0.152119
Aco022012	0	0.183029	0.095876	0.101239	0.166437	0	0.088219	0.074666	0	0.209895	0.127582	0.086217	0.066584	0	0.111312	0.157704	0	0	0	0	0	0	0	0.236703	0	0.138035	0	0.064153	0	0.115598	0	0	0	8.17862	7.77384	10.7582
Aco015159	0	0	0	0	0	0	0	0	0	0	0	0	0	0	0	0	0	0	0	0	0	0.197988	0	0	0	0	0	0	0	0	0	0	0	0	0	0
Aco029373	0	0	0	0	0	0	0	0	0	0	0.966402	0.267815	0	0	0	0	0	0	0	0	0	0	0	0	0	0	0	0	0	0	0	0	0	0	0	0
Aco017668	0.338238	0	0	0	0	0	0	0	0	0	0	0	0	0	0	0	0	0	0	0	0	0	0	0	0	0	0	0	0	0	0	0	0	0	0	0
Aco028478	0	0	0	0	0	0	0	0	0	0	0	0	0	0	0	0	0	0	0	0	0	0	0.279228	0	0	0	0	0	0	0	0	0	0	0	0	0
Aco029293	0	0	0	0	0	0	0	0	0	0	0	0	0	0	0	0	0	0	0	0	0	0	0	0	0	0	0	0	0	0	0	0	0.286439	0	0	0
Aco028809	0.263376	0.328299	0	0	0	0.42528	0	0.132539	0	0	0	0	0	0	0	0	0	0	0	0	0	0	0	0	0	0	0	0	0	0	5.29807	14.3406	33.6916	0	0	0
Aco011580	0	0	0.078059	0	0	0	0	0	0	0	0	0	0	0	0	0	0	0	0	0	0	0	0	0	0	0.048167	0	0	0.12181	0	0	0	0	6.39954	5.23361	4.15448
Aco028665	0	0	0.261726	0	0	0	0	0	0	0	0	0	0	0	0	0	0	0	0	0	0	0	0	0	0	0	0	0	0	0	0	0	0	0	0	0
Aco026441	0	0	0	0	0	0	0	0	0	0	0	0	0	0	0	0	0	0	0	0	0	0	0	0	0	0.19193	0	0	0	0	0	0	0	0	0	0
Aco029613	0	0	0	0	0	0	0	0	0	0	0	0	0	0	0	0	0	0	0	0	0	0	0	0	0	0	0	0	0	0	0	0.164338	0	0	0	0
Aco027249	0	0	0	0	0	0	0	0	0	0	0	0	0	0	0	0	0	0	0	0	0	0	0	0	0	0	0	0	0	0	0.125034	0	0	0	0	0
Aco030590	0	0	0	0	0	0	0	0	0	0	0	0	0	0	0	0	0	0	0.201825	0	0	0	0	0	0	0	0	0	0	0	0	0	0	0	0	0
Aco021201	0	0	0	0	0	0	0	0	0	0	0	0	0	0	0	0	0	0	0	0	0	0	0	0	0	0	0	0	0	0	0.230162	0.570461	0.291463	0	0	0
Aco029684	0	0	0	0	0	0	0.130988	0	0	0	0	0	0	0	0	0	0	0	0	0	0	0	0	0	0	0	0	0	0	0	0	0	0	0	0	0
Aco020402	0	0	0	0	0	0	0	0	0	0	0	0	0	0	0	0	0	0	0	0	0	0	0	0	0	0	0	0	0	0	0	0	0.218351	0	0	0
Aco024695	0	0	0	0	0	0	0	0	0	0	0	0	0	0	0	0	0	0	0	0	0	0	0	0	0.448579	0	0	0	0	0	0	0	0	0	0	0
Aco022960	0	0	0	0	0	0	0	0	0	0.43118	0	0	0	0	0	0	0	0	0	0	0	0	0	0	0	0	0	0	0	0	0	0	0	0	0	0
Aco022227	0	0	0	0	0	0	0	0	0	0	0	0	0	0	0	0	0	0	0	0	0	1.66128	0	0	0	0	0	0	0	0	0	0	0	0	0	0
Aco004322	0	0	0.102325	0	0	0	0	0	0	0	0	0	0	0	0	0	0	0	0	0	0	1.044	0	0	0	0	0	0	0	0	0	0	0	0	0	0
Aco019709	0	0	0	0	0	0	0	0.161767	0	0	0	0	0	0	0	0	0	0	0	0	0	0	0	0	0	0	0	0	0	0	0	0	0	0	0	0
Aco009071	0	0	0	0	0	0	0	0	0	0.20097	0	0	0	0	0	0.22783	0	0	0	0	0	11.3876	0.328635	0	0	0	0	0	0	0	0	0	0	0	0	0
Aco006239	0	0	0	0	0	0	0	0	0	0	0	0	0	0.262739	0	0	0	0	0	0	0	0	0	0	0	0	0	0	0	0	0	0	0	0	0	0
Aco004980	0	0.085753	0	0	0	0	0	0	0	0	0	0.102277	0.133098	0	0.343761	0	0	1.44784	65.465	0	0	0.288171	0.133373	0	0	0.209172	0	0	0	0	0	0	0	0	0	0
Aco008388	0.1504	0	0	0.406378	0	0	0	0	0	0	0	0	0	0	0	0	0	0	0	0	0	0	0	0.322613	0	0.184933	0	0	0	0	0	0	0	35.4838	15.8024	19.3589
Aco027327	0	0	0	0	0	0	0.103171	0	0	0	0	0	0	0	0	0	0	0	0	0	0	0	0	0	0	0	0	0	0	0	0	0	0	0	0	0
Aco029698	0	0	0	0	0	0	0	0	0	0	0	0	0	0	0	0	0	0	0	0.168929	0.173577	0	0	0	0	0	0	0	0	0	0	0	0	0	0	0
Aco013828	0.253025	0	0	0	0	0	0	0	0	0	0	0	0	0	0	0	0	0	0	0	0	0	0	0	0	0	0	0	0	0	0	0	0	0	0	0
Aco012825	0	0	0	0	0	0	0	0	0	0.150355	0	0	0	0	0	0	0	0	0	0	0	4.28987	0	0	0	0	0	0	0	0	0	0	0	0.37302	0	0
Aco028720	0	0	0	0	0	0	0	0	0	0	0	0	0	0	0	0	0	0	0	0.150849	0	0	0	0	0	0	0	0	0	0	0	0	0	0	0	0
Aco014785	0	0	0.367264	0	0	0.088096	0	0	0.074257	0	0.153263	0.468453	0	0	0.267313	0.413455	0	0.144812	0.503649	0	0.171084	39.0519	1.44956	0	0	0.749047	0	0	0	0	0	0	0	0.172236	0.061532	0
Aco014682	28.6379	9.08597	28.3619	29.3322	14.5983	28.8212	0.9966	0.467906	0.782901	0	0	0	0.474362	0	0	0	0	0	0	0.452386	0	0.352274	0	0	0	0	1.77391	0	0	0	520.231	444.79	544.327	0	1.09385	0.335425
Aco029642	0	0	0	0	0	0	0	0	0	0	0	0	0	0	0	0	0	0	0	0	0	0.380588	0	0	0	0	0	0	0	0	0	0	0	0	0	0
Aco031182	0.325067	0	0	0	0	0	0	0	0	0	0	0	0	0	0	0	0	0	0	0	0	0	0	0	0	0	0	0	0	0	0	0	0	0	0	0
Aco026355	0	0	0	0	0	0	0	0	0	0	0	0	0	0	0	0	0	0	0	0	0	2.36037	0	0	0	0	0	0	0	0	0	0	0	0	0	0
Aco022638	0	0	0	0	0	0	0	0	0	0	0	0	0.16853	0	0	0	0	0	0	0	0	0	0	0	0	0	0	0	0	0	0	0	0	0	0	0
Aco014712	0	0	0	0	0	0	0	0	0	0	0	0	0	0	0	0	0	0	0	0	0	0.737733	0	0	0	0	0	0	0	0	0	0	0	0	0	0
Aco021469	0	0	0	0	0	0	0	0	0	0	0	0	0	0	0	0	0	0	0	0	0	0	0	0	0	0	0	0	0	0	0	0	0.123517	0	0	0
Aco024826	0	0	0	0	0	0	0	0	0	0	0	0	0	0	1.20933	0	0	0	0	0	0	0	0	0	0	0	0	0	0	0	0	0	0	0	0	0
Aco001044	0	0	0	0	0	0	0.67153	0	0	2.01689	0	0	0	0	0	0.195216	0	0	0	0	0	278.192	3.19486	0	0	0	0	0	0	0	0	0	0	0	0	0
Aco006685	0	0	0	0.287195	0	0	0.639791	0	0	0.325268	0	0	0.157074	0	0	0	0	0	25.3947	0.129909	0	0	0.128478	0	0	0	0	0	0	0	0	0	0	0	0	0
Aco030791	0	0	0	0	0	0	0	1.19793	0	0	0	0	0	0	0	0	0	0	0	0	0	0	0	0	0	0	0	0	0	0	0	0	0	0	0	0
Aco009587	0	0	0.710898	0.200801	0	0.366096	0	0	0	0	0	0	0	0	0	0	0	0	0	0	0	0	0	0	0	0	0	0	0	0	7.42533	13.1727	10.0233	0.076573	0	0
Aco022674	0	0	0	0	0	0	0	0	0	0	0	0	0	0	0	0	0	0	0	0	0	0	0	0	0	0	0	0	0	0	0.142116	0	0	0	0	0
Aco025916	1.65206	2.80574	6.16761	0	0.182678	0.150457	0	0	0	0	0	0	0	0	0	0	0	0	0	0	0	0	0	0	0	0	0	0	0	0	0	0	0	0	0	0
Aco006217	0	0	0	0	0	0.158478	0	0	0	0	0	0	0	0	0	0	0	0	0	0	0	0	0	0	0	0	0	0	0	0	0	0	0	0	0	0
Aco001180	0	0	0	0	0	0	0	0	0	0	0	0	0	0	0	0	0	0	0	0	0	0	0	0	0	0	0	0	0	0	0.455437	2.47669	0.115683	0	0	0
Aco009088	1.45828	0.582683	2.70623	0.378325	0.691199	0.699658	0	0	0	0	0	0	0	0	0	0	0	0	0	0.12331	0	1.15049	0	0	0	0	0	0	0	0	28.0192	76.5693	65.9121	0.172077	0	0.20354
Aco006808	0	0	0.065401	0	0	0	0	0	0	0	0	0	0	0	0	0	0	0	0	0	0	0.601729	0	0	0	0	0	0	0	0	0	0	0	0	0	0
Aco007091	0	0	0	0	0	0	0	0	0	0	0	0	0	0	0	0	0	0	0	0	0.237694	0	0	0	0	0	0	0	0	0	0	0	0	0	0	0
Aco024507	2.09862	0	1.34946	0	0.405847	2.01739	0	0	0	0	0	0	0	0	0	0	0	0	0	0	0	0	0	0	0	0	1.36454	0	0	0	66.5933	84.3549	56.8637	0	0	0
Aco019238	0	0	0	0	0	0	0	0	0	0	0	0	0	0	0	0	0	0	0	0	0	0	0.472525	0	0	0	0	0	0	0	0	0	0	0	0	0
Aco013757	0	0	0	0	0	0	0	0	0	0	0	0	0	0	0	0	0	0	0	0	0	0	0	0	0	0	0	0.773673	0	0.862259	0	0	0	0	0	0
Aco025878	1.83756	0	0	1.41348	0	0	2.84989	0	0	1.085	0	0	1.57519	0	0	5.43217	0	0	0.681468	0	0.147614	591.285	35.1949	0.942733	0	0	0.293187	0	0	0	0	0	0	0.608091	0	0.884579
Aco013964	0.334014	0	0.115267	0	0	0	0	0	0	0	0	0	0	0	0	0	0	0	0	0	0	0	0	0	0	0	0	0	0	0	0	0	0	0	0	0
Aco009815	0	0	0	0	0	0	0	0	0	0	0	0	0	0	0	0	0	0	0	0	0	0	0	0	0	0	0	0.576673	0	0	0	0	0	0	0	0
Aco030021	0	0	3.85921	0	0	0	0	0	0	0	0	0	0	0	0	0	0	0	0	0	0	0	0	0	0	0	0	0	0	0	0	0	0	0	0	0
Aco015826	0	0	0	0	0	0	0	0	0	0	0	0	0	0	0	0	0	0	0	0	0	1.07745	0	0	0	0	0	0	0	0	0	0	0	0	0	0
Aco016793	0	0	0	0	0	0	0	0	0	0	0	0	0	0	0	0	0	0	0	0	0	0.559367	0	0	0	0	0	0	0	0	0	0	0	0	0	0
Aco030139	0.483639	0	0	0	0	0	0	0	0	0	0	0	0	0	0	0	0	0	0	0	0	0	0	0	0	0	0	0	0	0	0	0	0	0	0	0
Aco024297	0.654128	0	0	0.254656	0	0	0.716969	0	0	0.70189	0	0	0.642606	0	0	1.31546	0	0	0.161095	0.055456	0	131.695	4.97884	0	0.084675	0	0.059656	0	0	0	0.207773	0	0.442093	0.621317	0	0.201024
Aco000810	0	3.79242	0	0	0	0	0	0	0	0	0	0	0	0	0	0	0	0	0	0	0	0	0	0	0	0	0	0	0	0	0	0	0	0	0	0
Aco026016	0.051297	0	0.047333	0	0	0	0.297271	0	0	0	0	0	0	0	0	0	0	0	0.375939	0	0	35.2093	0	0	0	0	0	0	0	0	0	0	0	0	0	0
Aco015528	0	0	0	0	0	0	0	0	0	0	0	0	0	0	0	0	0	0	0.159933	0	0	4.08947	0	0	0	0	0	0	0	0	0	0	0	0	0	0
Aco005985	0	0.580699	0	0	0	0	0	0	0	0	0	0	0	0	0	0	0	0	0	0	0	0	0	0	0	0	0	0	0	0	0	0	0	0	0	0
Aco019212	0	0	0	0	0	0	0	0	0	0	0	0	0	0	0	0.220879	0	0	0	0	0	0	0	0	0	0	0	0	0	0	0	0	0	0	0	0
Aco024522	0	0	0	0	0	0	0	0	0	0	0	0	0	0	0	0	0	0	0.114997	0	0	0	0	0	0	0	0	0	0	0	0	0	0	0	0	0
Aco016178	0	0	0	0	0	0	0	0	0	0	0	0	0	0	0	0	0	0	0	0	0	0	0	0	0	0	0	0	0	0	0	0	0	0	0.212584	0
Aco016173	81.6321	33.5921	77.5273	70.2866	38.2702	61.4739	19.4417	0.951747	0.624746	2.81901	0.566747	0.865134	0.71138	0.416757	0.16652	0.597396	0	0	1.96796	3.49728	0	6.05168	27.4875	1.39812	1.01929	0.277557	41.4549	0	0.330998	0	2148.48	1576.84	2214.62	1.84616	0.569519	2.06503
Aco029238	0	0	0	0	0	0	0	0	0	0	0	0	0	0	0	0	0	0	0	0.575784	0	0	0	0	0	0	0	0	0	0	0	0	0	0	0	0
Aco031046	0	0	0.297297	0	0	0	0	0	0	0	0	0	0	0	0	0	0	0	0	0	0	0	0	0	0	0	0	0	0	0	0	0	0	0	0	0
Aco017585	0	0	0	0	0.248189	0	0	0	0	0	0	0	0	0	0	0	0	0	0	0	0	0	0	0	0	0	0	0	0	0	0	0	0	0	0	0
Aco004657	0	0	0	0	0	0	0	0	0	0	0	0	0	0.372679	0	0	0	0	0	0	0	0	0	0	0	0	0	0	0	0	0	0	0	0	0	0
Aco015958	0	0	0	0	0	0	0	0	0	0	0	0	0	0	0	0	0	0	0	0	0	0.627665	0	0	0	0	0	0	0	0	0	0	0	0	0	0
Aco024838	0	0	0	0	0	0	0	0	0	0	0	0	0	0	0	0	0	0	0	0	0	0	0	0	0	0	0	0	0	0	0	0.349862	0	0	0	0
Aco005564	20.4104	15.0854	22.9009	10.2864	7.71491	15.0683	0	0	0	0	0	0	0	0	0	0.120365	0	0	0	0	0	0	0	0	0.146814	0	0	0	0	0	385.723	360.679	538.827	0.34874	0.289407	0.111336
Aco013764	0	0	0.501606	0	0	0	0	0	0	0	0	0	0	0	0	0	0	0	0	0	0	0	0	0	0	0	0	0	0	0	0	0	0	0	0	0
Aco031714	0	0	0	0	0	0	0	0	0	0	0	0	0	0	0	0	0	0	0	0	0	0.323085	0	0	0	0	0	0	0	0	0	0	0	0	0	0
Aco015744	0	0	0	0	0	0	0	0	0	0	0	0	0	0	0	0	0	0	0	0	0	0.2874	0	0	0	0	0	0	0	0	0	0	0	0	0	0
Aco016563	0	0	0	0	0	0	0	0	0	0	0	0	0	0	0	0	0	0	0	0.157746	0	0	0	0	0	0	0	0	0	0	0	0	0	0	0	0
Aco018560	0	0	0	0	0	0	0	0	0	0	0	0	0	0	0	0	0	0	0	0	0	0	0	0.395022	0	0	0	0	0	0	0	0	0	0	0	0
Aco030365	0.148673	0	0	0	0	0	0	0	0	0	0	0	0	0	0	0	0	0	0	0	0	0	0	0	0	0	0	0	0	0	0	0	0	0	0	0
Aco026628	0	0	0.107342	0	0	0	0	0	0	0	0	0	0	0	0	0	0	0	0	0	0	0	0	0	0	0	0	0	0	0	0	0	0	0	0	0
Aco029009	0	0	0	0	0	0	0	0	0	0	0	0	0	0	0	0	0	0	0	0	0	0	0	0	0	0	0	0	0	0	0	0	0	0	0	0.870874
Aco003189	0.210285	0.149178	0.064467	0.119424	0.202775	0.249968	0.243625	0	0.067935	0	0	0	0	0	0	0	0.06699	0	0	0	0	29.4774	1.36951	0	0	0.115747	0	0	0	0	0.152644	0	0.114293	0.122685	0.069045	0.117903
Aco026059	0	0	0	0	0	0	0	0	0	0	0	0	0	0	0	0	0	0.487919	0	0	0	0	0	0	0	0	0	0	0	0	0	0	0	0	0	0
Aco000633	0.624381	0.16892	1.59598	0.66096	0.702957	1.09999	0.419226	0	0.084142	0	0.131912	0.124347	0.458119	0	0.108878	0.174012	0.129387	0.289594	0.138622	0.704679	0.632989	0.335906	0	0.621586	0.188989	0	0.840458	0	0	0.08988	22.5399	52.6903	59.0227	0.271575	0	0.593773
Aco013708	0.818323	0	0.222087	0.588168	0	0	1.40678	0	0	1.97451	0	0	1.60896	0	0	1.28787	0	0.059302	0.260998	0	0.155858	293.565	20.7018	0.342874	0	0.278159	0.222183	0	0.160628	0	0	0	0	1.10722	0	0
Aco021855	0	0	0	0	0	0	0.642565	0	0	0	0	0	0	0	0	0	0	0	0	0	0	0	0	0	0	0	0	0	0	0	0	0	0	0	0	0
Aco003038	0	0	0	0	0	0.114491	0.644335	0	0	0	0.082872	0	0	0	0	0	0	0	0	0.109294	0	14.6356	0.399173	0	0	0	0	0	0	0	0	0	0	0	0	0
Aco027494	0	0	0.253539	0	0	0	0	0	0	0	0	0	0	0	0	0	0	0	0	0	0	0	0	0	0	0	0	0	0	0	0	0	0	0	0	0
Aco000421	0	0	0	0	0	0	0	0	0	0	0	0	0	0	0	0	0	0	2.53366	8.57037	0	0.801253	0	0	0	0	0	0	0	0	0	0	0	0	0	0
Aco027840	0	0	0	0	0	0	0	0	0	0	0	0	0	0	0	0	0	0	0	0	0	15.56	0.08066	0	0	0	0	0	0	0	0	0	0	0	0	0
Aco013211	0	0	0	0	0	0	0	0	0	0	0	0	0	0	0	0	0	0	0	0	0	0.778728	0	0	0	0	0	0	0	0	0	0	0	0	0	0
Aco019716	0	0	0	0	0	0	0	0	0	0	0	0	0	0	0	0	0	0	0	0	0	0	0	0	0	0	0	0	0	0	0.290761	0	0.12071	0	0	0
Aco031451	0	0	0	0	0	0	0	0	0	0	0	0	0	0	0	0	0	0	0	0	0	0	0	0	0	0	0	0	0	0	0	0	0	0	1.86889	0
Aco015370	0	0	0	0	0	0	0	0	0	0	0	0	0	0	0	0	0	0	0	0	0	0	0	0	0	0.123155	0	0	0	0	0	0	0	0	0	0
Aco024883	0	0	0	0	0	0	0	0	0	0	0	0	0	0	0	0	0	0	0	0	0	0	0	0	0	0	0	0	0	0	0	0	0	0	0.113773	0
Aco016303	0	0	0	0	0	0	0	0	0.267726	0	0	0	0	0	0	0	0	0	0	0	0	0	0	0	0	0	0	0	0	0	0	0	0	0	0	0
Aco022210	0	0	0	0	0	0	0	0	0	0	0	0	0	0	0	0	0	0	3.69922	2.30945	0	0	0	0	0	0	0	0	0	0	0	0	0	0	0	0
Aco006346	0	0	0	0	0	0	0	0	0	0	0	0	0	0	0	1.37926	0	0	0	0	0	0	0	0	0	0	0	0	0	0	0	0	0	0	0	0
Aco013443	0	0	0	0.164122	0	0.137063	0	0	0	0	0	0	0	0	0	0	0	0	0	0	0	0	0	0	0	0	0	0	0	0	0	0	0	0	0	0
Aco016745	0	0	0	0	0	0	0	0	0	0	0	0	0	0	0	0	0	0	0	0	0	2.41589	0	0	0	0.076539	0	0	0	0	0	0	0	0	0	0
Aco029399	0	0	0	0	0	0	0	0	0	0	0	0	0	0	0	0	0	0	0.391873	0	0	0	0	0	0	0	0	0	0	0	0	0	0	0	0	0
Aco020544	0	0	0	0	0	0	0	0	0	0	0	0	0	0	0	0.052737	0	0	0	0	0	3.95172	0.154336	0	0	0	0	0	0	0	0	0	0	0.061641	0	0
Aco014415	0	0	0	0	0	0	0.098024	0	0	0	0	0	0	0	0	0	0.068833	0	0	0	0	106.753	3.8912	0	0	0	0.065387	0	0	0	0	0	0	0	0	0
Aco014039	0	0	0	0.181865	0	0.04099	0.852007	2.11542	0.615533	0	0	0	0	0.271444	0.935308	0	0.917535	0.372335	0.319922	2.82841	3.91067	0	0	0	0	0	0	1.52079	5.40149	1.91002	0	0	0	122.258	153.674	87.2623
Aco009856	0.504526	0.586844	0.181566	0	0.104725	0.286367	0	0	0	0	0	0	0	0	0	0.079052	0	0	0.095782	0	0	0	0.056441	0	0	0	0.102009	0	0	0	8.13985	18.6645	22.3959	0	0	0
Aco011705	0	0	0	0	0	0	0	0	0	0	0	0	0	0	0	0	0	0	0	0	0	0	0	0	0	0	0	0	0	0	0.266355	0	0	27.2251	49.5065	40.1802
Aco010160	0.342901	0	0	0.796017	0	0	1.95981	0	0	2.18105	0	0	0.403234	0	0	0.521141	0	0	0	0	0	1307.97	69.3884	0	0	0	0	0	0	0	0	0	0	0.244532	0	0
Aco001638	0	0	0	0	0	0	0	0	0	0	0	0	0	0	0	0	0	0	0	0.063779	0	35.2392	0.674146	0	0	0.063262	0	0	0	0	0	0	0	0	0	0.078903
Aco020901	0	0	0	0	0	0	0	0	0	0	0	0	0	0	0	1.78414	0	0	0	0	0	0	0	0	0	0	0	0	0	0	0	0	0	0	0	0
Aco023741	0	0	0	0	0	0	0.238907	0	0	0	0	0	0	0	0	0	0	0	0	0	0	0	0	0	0	0	0	0	0	0	0	0	0	0	0	0
Aco008810	0	0	0	0	0	0	0	0	0	0	0	0	0	0	0	0	0	0	0.114871	0	0	0	0	0	0	0	0	0	0	0	0	0	0	0	0	0
Aco029128	0	0	0	0	0	0	0	0	0	0	0	0	0	0	0	0	0	0	0	3.50563	0	0	0	0	0	0	0	0	0	0	0	0	0	0	0	0
Aco003644	0	0	0	0	0	0	0.403562	0	0	0	0	0	0	0	0	0	0	0	2.33203	4.66842	0	0	0	0	0	0	0	0	0	0	0	0	0	0	0	0
Aco016814	0	0	0	0	0	0	0	0	0	0	0	0	0	0	0	0	0	0	0	0	0	0	0	0	0.426267	0	0	0	0	0	0	0	0	0	0	0
Aco012276	0	0	0	0	0	0	0	0	0	0	0	0	0	0	0	0	0	0	0	0	0	0	0	0	0	0	0	0.144393	0	0	0	0	0	0.365666	1.23812	0.53744
Aco024428	0	0	0	0	0	0	0	0	0	0.221892	0	0	0	0	0	0	0	0	0	0	0	0	0	0	0	0	0	0	0	0	0	0	0	0	0	0
Aco030217	0	0	0.184689	0	0	0	0	0	0	0	0	0	0	0	0	0	0	0	0	0	0	0	0	0	0	0	0	0	0	0	0	0	0.112442	9.23585	7.40646	6.63182
Aco004956	3.71513	1.92868	4.00484	3.61214	4.27102	8.1392	0.425173	0.473589	0.141422	0.78978	0.55074	0.218849	0.632631	0.187922	0.262415	0.640499	1.16713	0.228737	3.57346	0.421621	0	0.948922	0.935108	0	1.3136	0.597463	0.264135	0	0.667107	0.815386	147.991	188.341	204.182	1.50976	1.84849	1.1727
Aco003028	0	0	0	0	0	0	0	0	0	0	0	0	0	0	0	0	0	0	0	0	0	0	0	0	0	0	0	0	0	0	0	0	0	2.13846	1.69775	0
Aco013517	0	0	0	0	0	0	0	0	0	0	0	0	0	0	0	0	0	0	0	0	0	7.39301	0.372028	0	0	0	0	0	0	0	0	0	0	0	0.103654	0
Aco010827	0.397475	0	0	0.768205	0	0	1.32374	0	0	0.249542	0	0	0	0	0	0.633145	0	0	0.756985	0	0.436311	1011.56	56.1932	0.31294	0	0.204444	0	0	0	0	0	0	0	0	0	0
Aco026686	0	0	0	0	0	0.516336	0	0	0	0	0	0	0	0	0	0	0	0	0	0	0	0	0	0	0	0	0	0	0	0	0	0	0	0	0	0
Aco003771	0	0	0	0	0	0	0	0	0	0	0	0	0	0	0	0	0	0	0	0	0	0	0	0	0	0	0	0	0.327058	0	0	0	0	0	0	0
Aco012624	0	0	0.217353	1.12921	0.559668	0	1.6662	8.43545	1.95103	0	3.19767	1.52732	1.06267	4.63174	5.7566	2.13525	11.7797	12.2029	6.92621	656.743	621.205	4.97032	7.31969	0.328805	1.87329	1.35873	10.0409	4.19113	3.80517	2.16403	0	0	0.199424	1.59047	5.76813	1.64044
Aco026564	0	0.256371	0	0	0	0	0	0	0	0	0	0	0	0	0	0	0	0	0	0	0	0	0	0	0	0	0	0	0	0	0	0	0	0	0	0
Aco016842	0	0	0	0	0	0	0	0	0	0	0	0.099885	0	0	0	0	0	0	0	0.211007	0	0.036771	0	0	0	0	0	1.62956	3.69386	1.23466	0	0	0	28.9893	26.4591	38.8462
Aco029653	0	0	0	0	0	0	0	0	0	0	0	0	0	0	0	0	0.425647	0	0	0	0	0	0	0	0	0	0	0	0	0	0	0	0	0	0	0
Aco024471	0	0	0	0	0	0	0	0	0	0.166355	0	0	0	0	0	0	0	0	0	0.20913	0	0	0	0	0	0	0	0	0	0	0.603366	0.292696	4.52193	0	0	0.196283
Aco015582	0	0	0	0	0	0	0	0	0	0	0	0	0	0	0	0	0	0	0	0	0	0	0	0	0	0.160834	0	0	0	0	0	0	0	0	0	0
Aco007758	0	0	0	0	0	0	0	0	0	0	0	0	0	0	0	0	0	0	0	0	0	0	0	0	0	0	0	0	0	0	0	0	0	0.916017	1.0758	0.384683
Aco016479	0	0	0	0	0	0	0	0	0	0	0	0	0	0	0	0	0	0	0	0	0	0	0	0	0	0	0	0	0	0	0	0	0	19.7572	6.82873	29.177
Aco026834	0	0	0	0	0	0	0	0	0	0	0	0	0	0	0	0	0	0	0	0	0	0	0	0	0	0.802934	0	0	0	0	0	0	0	0	0	0
Aco027935	0	0	0	0	0	0	0	0	0	0	0	1.51844	0	0	0	0	0	0	0	0	0	0	0	0	0	0	0	0	0	0	0	0	0	0	0	0
Aco014934	1.26646	0	0	0	0	0	0	0	0	0	0	0	0	0	0	0	0	0	0	0	0	0	0	0	0	0	0	0	0	0	0	0	0	0	0	0
Aco015652	0	0	0	0	0	0	0	0	0	0	0	0	0	0	0	0	0	0	0	0.670223	0	0	0	0	0	0	0	0	0	0	0	0	0	0	0	0
Aco028645	0	0	0	0	0	0	0	0	0	0	0	0	0	0	0	0	0	0	0	0	0	1.38403	0	0	0	0	0	0	0	0	0	0	0	0	0	0
Aco013941	0	0	0	0	0	0	0	0	0.507964	0	0	0	0	0.208577	0.117037	0	0	0.078128	0	0.322911	0.176539	35.0382	0.119471	0	0	0	0	0	0	0	0	0	0	0.949358	0	0.404036
Aco006338	0	0	0	0	0	0	0	0	0	0	0	0	0	0	0	0	0	0	0	0	0	0	0	0	0	0	0.578749	0	0	0	0	0	0	11.931	5.11553	11.1382
Aco007492	0	0	0	0	0	0	0	0	0	0	0	0	0	0	0	0	0	0	0	0	0	0	0	0	0	0	0	0	1.32678	0	0	0	0	0	0	0
Aco010601	0	0	0	0	0	0	0	0	0	0	0	0.214881	0	0	0	0	0	0	0	0	0	0	0	0	0	0	0	0	0	0	0	0	0	0	0	0
Aco006848	0	0	0	0	0	0	0.465951	0	0	0	0	0	0	0	0	0	0	0	0	0	0	131.941	2.42473	0	0	0	0	0	0	0	0	0	0	0	0	0.119916
Aco029766	0	0.190358	0	0.218732	0	0	0	0	0	0	0	0	0	0	0	0	0	0.083724	10.2602	0.919382	0	0	0.506803	0	0	0	0.124201	0	0	0	0	0	0	0	0.093909	0
Aco027081	0	0	0	0	0	0	0	0	0	0	0	0	0	0	0	0	0	0	0	0	0	0	0	0	0	0	0	0	0	0	0	0	0	0.376139	0	0
Aco026709	0	0	0	0	0	0	0	0	0	0	0	0	0	0	0	0	0	0	0.213389	0	0	0	0	0	0	0	0	0	0	0	0	0	0	0	0	0
Aco019189	0	0	0	0	0	0	0	0	0	0	0	0	0	0	0	0	3.55728	0	0	0	0	0	0	0	0	0	0	0	0	0	0	0	0	0	0	0
Aco029947	0	0	0	0	0	0	0	0	0	0	0	0	0	0	0	0	0	0	0	0	0	0	0	0	0	0	0	0	0	11.6647	0	0	0	0	0	0
Aco007129	0	0	0	0.148709	0	0	0	0	0	0	0	0	0	0	0	0	0	0	0	0	0	3.88083	0.18954	0	0	0	0	0	0	0	0	0	0	0	0	0
Aco017796	0	0	0	0	0	0	0	0	0	0	0	0	0	0	0	0	0	0	0	0	0	0.209206	0	0	0	0	0	0	0	0	0	0	0	0	0	0
Aco021963	0	0	0	0	0	0	0	0	0	0	0	0	0	0	0	0	0.157604	0	0	0	0	0	0	0	0	0	0	0	0	0	0	0	0	0	0	0
Aco028474	0	0	0	0	0	0	0	0	0	0	0	0	0	0	0	0	0	0	0	0	0	8.16071	0	0	0	0	0	0	0	0	0	0	0	0	0	0
Aco026579	0.436324	0	0.530383	0.169498	0	0	2.76626	0	0.334771	1.92098	0	0	0	0	0.764157	1.76171	0	0	0.86306	0	0.600331	1995.29	91.1632	0.866604	0.290075	0	0	0	0	1.28305	0.271257	0	0	3.15385	4.29848	7.73297
Aco029741	0	0	0	0	0	0	0	0	0	0	0	0	0	0	0	0	0	0	0.272566	0.071039	0	0	0	0	0	0	0	0	0	0	0	0	0	0	0	0
Aco007367	0	0	0	0	0	0	0	0	0	0	0	0	0	0	0	0	0	0	0	0	0	0	0	0	0	0	0	0	0	0	10.1185	0.360763	0.442906	0	0	0
Aco020408	0.077338	0.127371	0	1.14384	0	0.111919	0.517639	0.919974	0	1.43166	0	0	0.23897	0	0	0.351754	0.093963	0.098534	138.649	12.1892	0.053608	1.18386	0.222818	0.074486	0	0.13619	0.140156	0	0	0	0	0.094729	0	0	0.058491	0
Aco020041	0	0	0	0	0	0	0	0	0	0	0	0	0	0	0	0	0	0	0	0	0	0.348397	0	0	0	0	0	0	0	0	0	0	0	0	0	0
Aco024947	0	0	0	0	0	0	0	0	0	0	0	0	0	0	0	0	0	0.166911	0	0	0	0	0	0	0	0	0	0	0	0	0	0	0	0	0	0
Aco010851	0	0	0	0	0	0	0	0	0	0	0	0	0	0	0	0	0	0	0	0	0	0.29583	0	0	0	0	0	0	0	0	0	0	0	0	0	0
Aco016620	0	0	0	0	0	0	0	0	0	0	0	0	0	0	0	0	0	0	0	0	0	5.4999	0	0	0	0	0	0	0	0	0	0	0	0	0	0
Aco019891	0	0	0.434679	0	0	0	0	0	0	0	0	0	0	0	0	0	0	0	0	0	0	0	0	0	0	0	0	0	0	0	0	0	0	0	0	0
Aco023207	0.170345	0.189186	0	0	0	0	0	0	0	0	0	0	0	0	0	0	0	0	0	0	0	0	0	0	0	0	0	0	0	0	0	0	0	0	0	0
Aco012753	0	0.019917	0	0	0	0	0	0	0	0	0	0	0	0	0	0	0	0	0	0	0	0.358092	0	0	0	0	0	0	0	0	0	0	0	0	0	0
Aco023116	0	0	0	0	0	0	0.5331	0	0.341384	0	0	0	0	0	0	0	0	0	0	0	0	0	0	0	0	0	0	0	0	0	0	0	0	0	0	0
Aco028843	0	0	0	0	0	0	0	0	0	0	0	0	0	0	0	0	0	0	0	0	0	1.26702	0	0	0	0	0	0	0	0	0	0	0	0	0	0
Aco003766	0	0	0	0	0.628853	0	0	0	0	0	0	0	0	0	0	0	0	0	0	0	0	0	0	0	0	0	0	0	0	0	0	0	0	0	0	0
Aco020775	0	0	0	0	0	0	0	0	0	0	0	0	0	0	0	0	0	0	0	0	0	0	0	0	0	0	0	0	0	0	0	0	0	0	0.439737	0
Aco018252	0.020343	0	0	0.316872	0	0	0	0	0	0	0	0	0	0	0	0	0	0	0	0	0	0	0	0	0	0	0	0	0	0	0	0	0	0	0	0
Aco030009	0	0	0	0	0	0	0	0	0	0	0	0	0	0	0	0	0	0	0	0	0	0	0	0	0	0	0	0	0	0	0	0	0	0.566772	0.323986	0
Aco016619	0	0	0	0	0	0	0	0	0	0	0	0	0.076657	0	0	0	0	0	0	0	0	1.1184	0	0	0	0	0	0	0	0	0	0	0	0	0	0
Aco012815	0	0	0	0	0	0	0	0	0	0	0	0	0	0	0	0	0	0	0	0	0	0	0	0	0	0	0	0	0.999255	1.78792	0.16945	0	0	0.793546	40.4561	61.0852
Aco005733	0	0	0	0	0	0	0	0	0	0	0	0	0	0	0	0	0	0	0	0	0	0	0	0	0	0	0	0	0	0	0	0	0	0	0.157412	0
Aco031453	0	0	0	0	0	0	0	0	0	0	0	0	0	0	0	0	0	0	0	0	0	0	0	0	0	0	0	0	0	0	1.08958	0	0	0	0	0
Aco015130	0	0	0	0	0	0	0	0	0	0	0	0	0	0	0	0	0	0	0	0	0	0	0	0	0	0	0	0	0	0	0	0.286075	0	0	0	0
Aco025670	0	0	0	0.195451	0	0	0	0	0	0	0	0	0	0	0	0	0	0	0	0	0	0	0	0	0	0	0	0	0	0	0	0	0	0	0	0
Aco020438	0	0	0	0	0	0	0	0	0	0	0	0	0	0	0	0	0	0	0	0	0	1.37386	0	0	0	0	0	0	0	0	0	0	0	0	0	0
Aco030856	0	0	0	0	0	0	0	0	0	0	0	0	0	0	0	0	0	0	0	0	0	0	0	0	0	0	0	0	0	0	0	0.491729	0.223068	0	0	0
Aco000779	0	0	0	0	0.353971	0	0	0	0	0	0	0	0	0	0	0	0	0	0	0	0	0	0	0	0	0	0	0	0	0	0	0	0	0	0	0
Aco026805	0	0	0	0	0	0	0	0	0	0	0	0	0	0	0	0	0	0	0	0	0	0.309423	0	0	0	0	0	0	0	0	0	0	0	0	0	0
Aco015155	0	0	0	0	0	0	0	0	0	0	0	0	0	0	0	0	0	0	0	0	0	0	0	0	0	0	0	0	0	0	0	0	0	0.790262	1.07401	0.720544
Aco010471	0	0.074886	0	0	0	0.075033	0	0	0	0	0	0	0	0	0	0	0	0	0	0	0	0	0	0	0	0	0	0	0	0	0.269883	3.18056	5.93091	0	0	0
Aco011125	0	0	0	0	0	0	0	0	0	0	0	0	0	0	0	0	0	0	0	0	0	0.117241	0	0	0	0	0	0	0	0	0	0	0	0	0	0
Aco020494	0	0	0	0	0	0.142878	0	0	0	0	0	0	0	0	0	0	0	0	0	0	0	0	0	0	0	0	0	0	0	0	0	0	0	0	0	0
Aco009504	0	0	0	0	0	0	0	0	0	0	0	0	0	0	0	0	0	0	0	1.37014	0	0	0	0	0	0	0	0	0	0	0	0	0	0	0	0
Aco011865	0	0	0	0	0	0	0	0	0	0	0	0	0	0	0	0	0	0	0	0.181891	0	0	0	0	0	0	0	0	0	0	0	0	0	0	0	0
Aco023637	0	0	0	0	0	0	0	0	0	0	0	0	0	0	0	0	0	0	0	0	0	0.221238	0	0	0	0	0	0	0	0	0	0	0	0	0	0
Aco013177	0	0	0	0	0	0	0	0	0	0	0	0	0	0	0	0	0	0	0	0	0	1.54289	0	0	0	0	0	0	0	0	0	0	0	0	0	0
Aco009092	0	0	0	0	0	0	0	0	0	0	0	0	0	0	0	0	0	0	0	0	0	0.193422	0	0	0	0	0	0	0	0	0	0	0	0	0	0
Aco008116	0	0	0	0	0	0	0	0	0.112979	0	0	0	0	0	0	0	0	0	0	0	0	0	0	0	0	0	0	0	0	0	0	0	0	0	0	0
Aco010612	1.17545	0	0.451311	0.481125	0	0.261121	2.77705	0	0	0.486805	0	0	1.29839	0	0	0.498131	0	0	0	3.50264	0.489934	706.083	34.7959	0	0	0.49239	0.279548	0	0	0	0.461849	0.548774	0	0	0	0.627319
Aco004300	0	0.184557	0	0	0	0	0	0	0	0	0	0	0	0	0	0	0	0	0	0	0	0	0	0	0	0	0	0	0	0	0	0	0	0	0	0
Aco008006	0	0	0	0	0	0	0	0	0	0	0	0	0	0	0	0	0	0	0	0	0	0.269049	0	0	0	0	0	0	0	0	0	0	0	0	0	0
Aco012447	0	0	0	0	0	0	0	0	0	0	0	0	0	0	0	0	0	0	0.109243	0	0	0	0	0	0	0	0	0	0	0	0	0	0	0	0	0
Aco022744	0	0	0	0	0	0	0	0	0	0	0	0	0.153105	0	0	0	0	0	0	0	0	0	0	0	0	0	0	0	0	0	0	0	0	0	0	0
Aco023360	0	0	0	0	0	0	0	0	0	0	0	0	0	0	0	0	0	0	0	3.00329	3.11939	0	0	0	0	0	0	0	0	0	0	0	0	0	0	0
Aco026622	0	0	0	0	0	0	0	0	0	0	0	0	0	0	0	0	0	0	0	0	0	0	0	0	0	0	0	0	0	0	0	0	0	0	0.201224	0
Aco031371	0	0	0	0	0	0	0	0	0	0	0	0	0	0	0	0	0	0	0	0	0.186208	0	0	0	0	0	0	0	0	0	0	0	0	0	0	0
Aco020388	0	0	0	0	0	0	0	0	0	0	0	0	0	0	0	0	0	0	0	0	0	0	0	0	0	0	0	0	0	0	0	0	0	4.52365	3.91639	13.4861
Aco001925	0	0	0	0	0	0	0	0.313383	0	0	0	0	0	0	0	0	0	0	0	0	0	0	0	0	0	0	0	0	0	0	0	0	0	0	0	0
Aco016297	0.448577	0.36236	0.111844	0.81762	0.597717	0.230522	1.4613	0	0	0.51388	0.11413	0.04526	0.857929	0	0	2.17435	0	0	1.28376	0.147823	0	150.813	7.89838	0	0	0.115458	1.20478	0	0	0.297933	0.276043	0.240143	0.310086	0.456069	0.392363	0.365196
Aco007399	0	0	0	0	0	0	0	0	0	0	0	0	0	0	0	0	0	0	0	0	0	0.239584	0	0	0	0	0	0	0	0	0	0	0	0	0	0
Aco011804	0	0	0	0	0	0	0	0	0	0	0	0	0	0	0	0	0	0	0	0	0	0	0	0	0	0	0	0.293155	0	0	0	0	0	11.2021	7.41809	9.63733
Aco027741	0	0	0	0	0	0	0	0	0	0	0	0	0	0	0	0	0	0	0	0	0	0	0	0	0	0	0	0	0	0	0	0	0	3.49444	1.19102	2.43408
Aco029957	0	0	0	0	0	0	0	0	0	0	0	0	0	0	0	0	0	0	0	0	0	0	0	0	0	0	0	0	0	0	0	0	0	0	0	0.120783
Aco018984	0	0	0	0	0	0	0	0	0	0	0	0	0	0	0	0	0	0	0	0	0	0	0	0	0	0	0	0	0	0.128858	0	0	0	0	0	0
Aco028202	0	0	0.193784	0	0	0.12265	0	0	0	0	0	0	0	0	0	0	0	0	0	0	0	0	0	0	0	0	0	0	0	0	13.4524	21.9795	17.6949	0	0	0
Aco006262	0	0	0	0	0	0	0	0	0	0	0	0	0	0	0	0	0	0	0	0.232487	0	11.2742	0	0	0	0	0	0	0	0	0	0	0	0	0	0
Aco028436	0	0	0	0	0	0	0	0	0	0	0	0	0	0	0	0.153307	0	0	0	0	0	0	0	0	0	0	0	0	0	0	0	0	0	0	0	0
Aco018365	0	0	0	0	0	0	0	0	0	0	0	0	0	0	0	0	0	0	0	0	0	0	0	0	0	0.212637	0	0	0	0	0	0	0	0	0	0
Aco008290	0	0	0	0	0	0	0	0	0	0.098868	0	0	0	0	0	0.092656	0	0	0	0.100676	0	10.1189	0.570382	0	0	0	0	0	0	0	0	0	0	0	0	0
Aco000570	0	0	0.201857	0	0	0.343293	0	0	1.49976	0	0	0	0	0	0	0	0	0	0	0	0	0.254097	0	0	0	0	0	0	0	0	0	0	0.091387	14.8748	16.5126	22.9431
Aco022418	0	0	0.173003	0	0	0	0	0	0	0	0	0	0	0	0	0	0	0	0	0	0	0	0	0	0	0	0	0	0	0	0	0	0	0	0	0
Aco013041	0	0	0	0	0	0	0	0	0	0	0	0	0	0	0	0	0	0	0	0	0	0	0	0	0	0	0	0	0	0	0	0	0	0.656624	0	0
Aco017539	0	0	0	0	0	0	0	0	0	0	0	0	0	0	0	0	0	0	0	0.468493	0	0	0	0	0	0	0	0	0	0	0	0	0	0	0	0
Aco028045	0	0	0	0	0	0	0	0	0	0	0	0	0	0	0	0	0.18331	0	0	0	0	0	0	0	0	0	0	0	0	0	0	0	0	0	0	0
Aco007497	0	0	0	0	0	0	0	0	0	0	0	0	0	0	0	0	0	0	0	0.500124	0	0	0	0	0	0	0	0	0	0	0	0	0	0	0	0
Aco027491	0	0	0	0	0	0	0	0	0	0	0	0	0	0	0	0	0	0	0	0	0	0	0	0	0	0	0	0	0	0	0	0	0.268334	0	0	0
Aco000529	0	0	0.081036	0	0	0	0.31083	0	0	0.213383	0	0	0	0	0	0.082098	0	0	0	0	0	400.602	18.4844	0	0	0	0	0	0	0	0	0	0	0	0.164069	0
Aco008096	0	0	0	0	0	0	0	0	0	0	0	0	0	0	0	0	0	0	0	0	0.141362	0	0	0	0	0	0	0	0	0	0	0	0	0	0	0
Aco023238	0	0	0	0	0	0	0	0	0	0	0	0	0	0	0	0	0	0	0	0	0	0.238532	0	0	0	0	0	0	0	0	0	0	0	0	0	0
Aco026104	0	0	0	0	0	0	0	0	0	0	0	0	0	0	0	0	0	0	0	0	0	0	0	0	0	0	0	0	0	0	0	0	0	0	0	0.114679
Aco019125	0	0	0	0	0	0	0	0	0	0	0	0	0	0	0	0	0	0	0	0	0	0.145959	0	0	0	0	0	0	0	0	0	0	0	0	0	0
Aco017072	0	0	0	0.172083	0	0	0	0	0	0	0	0	0.036396	0	0	0.05699	0	0	0.062465	0.120198	0	0.857341	0	0	0	0	0.262894	0	0	0	23.1457	18.1089	29.2363	0	0	0
Aco011144	0	0	0	0	0	0	0	0	0	0	0	0	0	0	0	0	0	0	0	0	0	0	0	0	0	0	0	0	0	0	0	0	0	0	0	0.112045
Aco029822	0	0	0	0	0	0	0	0	0	0	0	0	0	0	0	0	0	0	0	0	0	0	0	0	0	0	0	0	0	0	0	0.561501	0	0	0	0
Aco021232	0	0	0	0	0.102768	0	0	0	0	0	0	0	0	0	0	0	0	0	0	0	0.091888	0	0	0	0	0	0	0	0	0	0.109817	0	0	37.8025	19.0788	130.315
Aco018211	0	0	0	0	0	0	0	0	0	0	0	0	0	0	0	0	0	0	0	0	0	0	0	0	0	0	0	0	0	0	0	0.148046	0	0	0	0
Aco004261	0	0	0	0	0	0	0	0.151653	0	0	0	0	0	0	0	0	0	0	0	0	0	0	0	0	0	0	0	0	0	0	0	0	0	0	0	0
Aco015412	0	0	0	0	0	0	0	0	0	0	0	0	0.472612	0	0	0	0	0	0	0	0	0	0	0	0	0	0	0	0	0	0	0	0	0	0	0
Aco028247	0	0	0	0	0	0	0	0	0	0	0	0	0	0	0	0	0	0	0	0	0	0	0	0	0	0	0	2.04651	0	0	0	0	0	0	0	0
Aco029329	0	0	0	0	0	0	0	0	0	0	0	0	0.192773	0	0	0	0	0	0	0	0	0	0	0	0	0	0	0	0	0	0	0	0	0	0	0
Aco020546	0	0	0	0	0	0	0	0	0	0	0	0	0	0	0	0	0	0	0	0	0	0.278402	0	0	0	0	0	0	0	0	0	0	0	0	0	0
Aco019722	0	0	0	0	0	0	0.154526	0	0	0.689076	0	0	0.640571	0	0	0	0	0	0	0	0	18.8755	0	0	0.204425	0	0.753641	0	0	0	0	0	0	0	0	0
Aco014255	0	0	0	0	0	0	0	0	0	0	0	0	1.16571	0	0	0	0	0	0	0	0	0	0	0	0	0	0	0	0	0	0	0	0	0	0	0
Aco026009	0	0	0	0	0	0	0	0	0	0	0	0	0.354986	0	0	0	0	0	0	0	0	0	0	0	0	0	0	0	0	0	0	0	0	0	0	0
Aco011581	0	0	0	0	0	0	0	0	0	0	0	0	0	0	0	0	0	0	0	0	0	0.125201	0	0	0	0	0	0	0	0	0	0	0	0	0	0
Aco027116	0	0	0	0	0	0	0	0	0	0	0	0	0	0	0.245759	0	0	0	0	0	0	0	0	0	0	0	0	0	0	0	0	0	0	0	0	0
Aco002509	0	0	0	0	0	0	0	0	0	0	0	0.273005	0	0	0	0	0	0	0	0	0	0	0	0	0	0	0	0	0	0	0	0	0	0	0	0
Aco016933	0	0	0	0	0	0	0	0	0	0	0	0	0	0	0	0	0	0	0	0	0	0.22004	0	0	0	0	0	0	0	0	0	0	0	0	0	0
Aco008587	0	0	0	0	0.430305	0	0	0	0	0	0	0	0	0	0	0	0	0	0	0	0	0	0	0	0	0	0	0	0	0	0	0	0	0	0	0
Aco018722	0	0	0	0	0	0	0	0	0	0	0	0	0	0	0	0	0	0	0	0	0	0.230237	0	0	0	0	0	0	0	0	0	0	0	0	0	0
Aco021966	0.453495	1.2171	1.22003	1.01976	0.495225	1.21187	1.34342	0.459031	0.120647	0.982513	0.338794	0.364812	0.964724	0.344777	1.04375	0.569127	1.27874	0.941045	1.21904	0.898636	0.901817	172.593	1.51976	0.528823	0.24903	1.18029	0.204571	0.330511	0.622851	0.572789	1.78658	0.955597	1.31391	2.12318	0.20347	0.969866
Aco026400	0	0	0	0	0	0	0	0	0	6.84222	4.37733	0	0	0	0	0	0	0	0	0	0	0	0	0	0	0	0	0	0	0	0	0	0	0	0	0
Aco003075	0	0	0	0	0	0	0	0	0	0	0	0	0	0	0	0	0	0	0	0	0	0	0	0	0	0	0	0.639237	0	0	0	0	0	0	0	0
Aco007175	0	0	0	0	0	0	0	0	0	0	0	0	0	0	0	0	0	0	0	0	0	0	0	0	0	0	0	0	0	0	0	0	0	0	0	0.119513
Aco008901	0	0	0	0	0	0	0	0	0	0	0	0	0	0	0	0	0	0	0	0	0	0	0.788406	0	0	0	0	0	0	0	0	0	0	0	0	0
Aco026840	0	0	4.08123	0	0	0	0	0	0	0	0	0	0	0	0	0	0	0	0	0	0	0	0	0	0	0	0	0	0	0	18.5075	3.25717	34.5456	0	0	0
Aco009600	4.8223	0.496692	5.3353	7.03021	2.83266	6.7885	0.302064	0	0	0.278307	0	0.130512	0	0	0	0	0	0	0	0.226965	0.071977	0	0.446715	0	0	0	1.45061	0.291031	0	0.294184	162.339	146.309	177.627	0.338144	0	0.202755
Aco017662	0	0.090477	0	0	0	0	0.59513	0	0	0	0.08142	0	0	0.097241	0.095206	0.72651	0	0.252197	1.96623	0.656323	0.486903	87.4862	0.774665	0	0	0	0.272349	0	0	0	0	0	0	0	0.159651	0
Aco023922	0	0	0	0	0	0	0	0	0	0	0	0	0	0	0	0	0	0	0	0	0	0	0	0	0	0	0	0.458388	0	0.389501	0	0	0	0	0	0
Aco023094	0	0.237757	1.16267	0.350961	0	0.71607	0	0.946354	0.314176	0	0	0.064364	0	0	0	0	0	0.189627	0	0	0	0	0	0	0	0	0	0	0	0.237445	0.164849	0	0	118.958	75.2938	52.0737
Aco026849	0	0	0	0	0	0	0	0	0	0	0	0	0	0	0	0	0	0	0	0	0	0	0	0	0	0	0	0	0	0	0	0	0	0	0	0.683479
Aco026539	0	0	0	0	0	0	0	0	0	0	0	0	0	0	0	0	0	0	0	0	0	0	0	0	0	0	0	0	0	0	0.227879	0	0.121896	0	0	0
Aco025594	0	0	0	0	0	0	0	0	0	0	0	0	0	0	0	0.499239	0.297635	0	5.31666	0.647192	0.615467	0	0	0	0	0	0	0	0	0	0	0	0	0	0	0
Aco017446	0.535941	0	0.057268	0.370078	0.126647	0.060606	0.514125	0	0	0.28777	0.243052	0	0.138411	0	0	0.53293	0.176624	0	0.080601	0.066711	0	103.822	3.83281	0.084218	0	0.100682	0.199044	0	0	0	0	0.046708	0	0	0	0
Aco019555	0	0	0	0	0	0	0	0	0	0	0	0	0	0	0	0	0	0	0	2.15624	0	0	0	0	0	0	0	0	0	0	0	0	0	0	0	0
Aco010635	0	0	0	0	0	0	0	0	0.07587	0	0	0	0	0	0	0	0	0	0	0	0	0	0	0	0	0	0	0	0	0	0	0	0	1.20913	4.69438	1.89598
Aco017853	0	0	0	0	0	0	0	0	0	0	0	0	0	0	0	0	0	0	0	0	0	0.480042	0	0	0	0	0	0	0	0	0	0	0	0	0	0
Aco023110	0	0	0	0	0	0	0	0.222883	0	0	0	0	0	0	0	0	0	0	0	0	0	0	0	0	0	0	0	0	0	0	0	0	0	0	0	0
Aco024741	0	0	0	0	0	0	0	0	0	0	0	0	0	0	0	0	0	0	11.2997	0	0	0	0	0	0	0	0	0	0	0	0	0	0	0	0	0
Aco029424	0.118357	0	0.120706	0	0	0.194959	0	0	0	0	0	0	0	0	0	0.246271	0	0	0	0	0	0	0	0	0	0	0	0	0	0	2.77982	5.59178	10.69	0	0	0
Aco003981	0	0	0	0	0	0	0	0	0	0	0	0	0	0	0	0	0	0	0	0	0	0	0	0	0	0	2.57152	0	0	0	0	0	0	0	0	0
Aco008230	0	0	0	0	0	0	0	0	0	0	0	0	0	0	0	0	0	0	0	0	0	0	0	0	0	0	0	0	0	0	0	0	0	6.5154	3.50985	6.6457
Aco023841	0	0	0	0	0	0	0	0	0	0	0	0	0	0	0	0	0	0	0	0	0	1.85546	0	0	0	0	0	0	0	0	0	0	0	0	0	0
Aco010008	0	0	0	0.306787	0	0	0	0	0	0	0	0	0	0	0	0	0	0	0	0	0	0	0	0	0	0	0	0	0	0	0	0	0	0	0	0
Aco024004	0	0.071059	0.269008	0	0	0	0	0	0	0	0	0	0	0	0	0	0	0	0	0	0	0	0	0	0	0	0	0	0	0	0	0	0	0	0	0
Aco002893	1.99294	0.62007	2.68123	1.80088	0.241152	2.25152	1.07895	0	0	0.216878	0	0	0	0	0	0	0	0	0	0	0	0.971699	3.94538	0	0	0	0.479366	0	0.190867	0	262.197	252.522	308.066	0	0	0
Aco011905	0	0	0	0	0	0	0	0	0	0	0	0	0	0	0	0	0	0	0	0	0	0	0	0	0	0	0	0	0	0	0	0	0	0	0.093318	0.221853
Aco018957	0	0	0	0	0	0	0	0	0	0	0	0	0	0	0	0	0	0	0	0	0	0.263508	0	0	0	0	0	0	0	0	0	0	0	0	0	0
Aco013482	0	0	0	0.04018	0	0	0.166697	0	0	0.066833	0	0.027175	0.070892	0.088885	0	0.045998	0.040404	0	0.19597	0	0	47.9123	1.59499	0.076209	0.043592	0.051535	0.083083	0	0.168607	0.039404	0	0.143463	0.08284	0.044052	0.072018	0.021292
Aco030254	0	0	0	0	0	0	0	0	0	0	0	0	0	0	0	0	0	0	0	0	0	0.413887	0	0	0	0	0	0	0	0	0	0	0	0	0	0
Aco018041	0	0	0	0	0	0	0	0	0	0	0	0	0.1089	0	0	0	0	0	0	0	0	4.36956	0.097663	0	0	0	0	0	0	0	0	0	0	0.169827	0.253801	0.094483
Aco029440	0	0	0	0	0	0	0	0	0	0	0	0	0	0	0	0	0	0	0	0	0	0.182631	0	0	0	0	0	0	0	0	0	0	0	0	0	0
Aco008544	0	0	0	0	0	0.102418	0	0	0	0	0	0	0	0	0	0	0	0	0	0	0	0	0	0.127672	0	0	0	0	0	0	0	0.080784	0	1.67261	0.764637	4.3327
Aco021283	0	0	0	0	0	0	0	0	0	0	0	0	0	0	0	0	0	0	1.00656	0.992386	0	0	0	0	0	0	0	0	0	0	0	0	0	0	0	0
Aco008970	0	0	0	0	0	0	0	0	0	0	0	0	0	0	0	0	0	0	0	0	0	1.8462	0	0	0	0	0	0	0	0	0	0	0	0	0	0
Aco016399	0	0	0	0	0	0	0	0	0	0	0	0	0	0	0	0	0	0	0	0	0.182311	0	0	0	0	0	0	0	0	0	0	0	0	0	0	0
Aco021537	0	0	0	0	0	0	0	0	0	0	0	0	0	0	0	0.139733	0	0	0	0	0	0	0	0	0	0	0	0	0	0	0	0	0	0	0	0
Aco015277	0	0	0	0	0	0	0	0	0	0	0	0	0	0	0	0	0	0	0	0.293445	0	0	0	0	0	0	0	0	0	0	0	0	0	0	0	0
Aco003679	0	0	0	0	0	0	0	0	0	0	0	0	0	0	0	0	0	0	0	0	0	0	0	0	0	0	0	0	0	0	0	0	0	0.577524	0	0.538538
Aco015800	0	0	0	0	0	0	0	0	0	0	0	0	0	0	0	0	0	0.106316	0	0	0	0	0	0	0	0	0	0	0	0	0	0	0	0	0	0
Aco022363	0	0	0	0	0	0.137864	0	0	0	0	0	0	0	0	0	0	0	0	0	0	0	0	0	0	0	0	0	0	0	0	0	0	0	0	0	0
Aco027423	0	0	0	0	0	0	0	0	0	0	0	0	0	0	0	0	0	0	0	0	0	0.750584	0	0	0	0	0	0	0	0	0	0	0	0	0	0
Aco016658	0	0.075651	0	0	0	0	0.473739	0	0	0.174912	0	0	0	0	0	0	0	0	0	0.892211	0.476676	25.5799	0	0	0.706652	0	0	0.189173	0	0	0	0	0	0	0	0.637707
Aco020968	0.592345	0.695648	1.5324	0	0	0	0	0	0	0	0	0	0	0	0	0	0	0	0	0	0	0.15576	0	0	0	0	0	0	0	0	0.02902	0	0	0	0	0
Aco018621	0	0	0	0	0	0	0	0	0	0	0	0	0	0	0	0	0	0	0	0	0	0	0	0	0	0	0	0	0	0	0	0.401795	0	0	0	0
Aco030470	0	0	0	0	0	0	0	0	0	0	0	0	0	0	0	0	0	0	0	0	0	0.269733	0	0	0	0	0	0	0	0	0	0	0	0	0	0
Aco010561	0.145518	0	0	0.089455	0	0	0.223827	0	0	0.159344	0	0	0.149679	0	0	0	0	0	0	0	0.234409	367.132	17.5644	0.092899	0	0	0	0	0	0	0.137383	0	0	0	0	0
Aco000042	0	0	0.106448	0	0	0	0	0	0	0	0	0	0	0	0	0	0	0	0	0	0	10.7134	0	0	0	0	0	0	0	0	0	0	0	0	0	0
Aco031800	0	0	0	0	0	0	0	0	0	0	0	0	0	0	0	0	0	0	0	0	0	0	0	0	0	0	0	0	0	0	2.6249	1.86752	1.13231	0	0	0
Aco000973	0	0	0	0	0	9.5967	0	0	0	0	0	0	0	0	0	0	0	0	0	0	0	0	0	0	0	0	0	0	0	0	0	0	0	0	0	0
Aco031485	0	0	0	0	0	0	0	0	0	0	0	0	0	0	0	0	0	0	0	0	0	0	0	0	0	0	0	0	0	0	0	0	0	0.257329	0	0
Aco027656	0	0	0	0	0	0	0	0	0	0	0	0	0	0	0	0	0	0	0	0	0	0	0	0	0	0	0	0	0	0	0	0	0	18.1178	6.25656	26.7621
Aco031192	0	0	0	0	0	0	0.234653	0	0	0	0	0	0	0	0	0	0	0	0	0	0	0	0	0	0	0	0	0	0	0	0	0	0	0	0	0
Aco013926	0	0	0	0	0	0	0	0	0	0	0	0	0	0	0	0	0	0	0	0	0	0	0	0	0	0	0	0	0	0	0	0	0	0.375179	0	0
Aco013013	0	0	0	0	0	0	0	0	0	0	0	0	0	0	0	0	0	0	0	0	0	0	0	0.714715	0	0	0	0	0	0	0	0	0	0	0	0
Aco031773	0	0	0	0	0	0	0	0	0	0	0	0	0	0	0	0	0.620432	0	0	0	0	0	0	0	0	0	0	0	0	0	0	0	0	0	0	0
Aco030148	0	0	0	0	0	0	0	0	0	0	0	0	0	0	0	0	0	0	0	0	0	0.881052	0	0	0	0	0	0	0	0	0	0	0	0	0	0
Aco010526	0	0	0	0	0	0	0	0	0	0	0	0	0	0	0	0	0	0	0	0	0	0.45869	0	0	0	0	0	0	0	0	0	0	0	0	0	0
Aco014075	0	0	0	0	0	0	0	0	0	0	0	0	0	0	0	0	0	0	0	0.120156	0	0	0	0	0	0	0	0	0	0	0	0	0	0	0	0
Aco014527	0	0	0	0.220004	0	0	0.198287	0	0	0	0	0	0	0	0	0	0	0	0.966147	0	0	0	0	0	0	0	2.83072	0.191045	0.585119	0.249991	0.111288	0	0.089389	51.2121	103.609	81.0415
Aco024568	0	0	0	0	0	0	0	0	0	0	0	0	0	0	0	0	0	0	0	0	0	0	0	0	0	0	0	0	0	0	2.31047	1.04872	0	0	0	0
Aco028428	0	0	0	0	0	0	0	0	0	0	0	0	0	0	0	0	0	0	0	0	0	0	0	0	0	0	0	0	0	0	0	0	0	0.460274	0	0
Aco009072	0	0	0	0	0	0	0	0	0	0	0	0	0	0	0	0	0	0	0	0	0	0.714322	0	0	0	0	0	0	0	0	0	0	0	0	0	0
Aco013040	0	0	0	0	0	0	0	0	0	0	0	0	0	0	0	0	0	0	0	0	0	0	0	0	0	0	0	0	0	0.762646	0	0	0	0	0	0
Aco013392	0	0	0	0	0	0	0	0	0	0	0	0	0	0	0	0	0	0	0	0	0	0	0.116408	0	0	0	0	0	0	0	0	0	0	0	0	0
Aco023235	0	0	0	0	0	0	0	0	0	0	0.483091	0	0	0	0	0	0	0	0	0	0	0	0	0	0	0	0	0	0	0	0	0	0	0	0	0
Aco004196	0	0	0	0	0	0	0	0	0	0	0	0	0	0	0	0	0	0	0	0	0	0	0	0	0.167364	0.134216	0	0	0	0	0	0	0	0.605443	0.128804	1.48374
Aco011719	0	0	0	0.168368	0	0	0	0	0	0	0	0	0	0	0	0	0	0	2.46983	0	0	0	0	0	0	0	0	0	0	0	0	0	0	0	0	0
Aco004759	0	0	0	0	0	0	0	0	0	0	0	0	0	0	0	0	0	0	0	0	0	3.55531	0	0	0	0	0	0	0	0	0	0	0	0	0	0
Aco015847	0	0	0	0	0	0	0	0	0	0	0	0	0	0	0	0	0	0	0	0	0	0.18202	0	0	0	0	0	0	0	0	0	0	0	0	0	0
Aco016621	0	0	0	0	0	0	0	0	0	0	0	0	0	0	0	0	0	0	0	0	0	0.43573	0	0	0	0	0	0	0	0	0	0	0	0	0	0
Aco026507	0.051856	0.114609	0.098588	0.112435	0.063591	0.069625	0	0	0.045945	0	0	0.073909	0	0.048632	0	0	0.109583	0.027131	0	0	0	0	0	0.105766	0	0.256277	0	0	0	0	1.57637	2.46998	6.02609	0	0	0
Aco018603	0	0	0	0	0	0	0	0	0	0	0	0	0	0	0	0	0	0	0	0	0	0.63559	0	0	0	0	0	0	0	0	0	0	0	0	0	0
Aco007438	0.14636	0	0.051443	0.240257	0	0	0.27807	0	0	0.097626	0.122177	0	0	0	0	0	0	0	0	0.05866	0.063796	54.2857	0.072962	0	0	0.145822	0.137084	0	0	0.083446	0.822492	0.955627	2.14545	0.147352	0.041929	0
Aco026839	0	0	0	0	1.10675	0	0	0	0	0	0	0	0	0	0	0	0	0	0	0	0	0	0	0	0	0	0	0	0	0	0	0	0	0	0	0
Aco018713	0	0	0	0	0	0	0.205741	0	0	0	0	0	0	0	0	0	0	0	0	0	0	0	0	0	0	0	0	0	0	0	0	0	0	0	0	0
Aco004134	0	0	0	0	0	0	0	0	0	0	0	0	0	0	0	0	0	0	0	0	0	18.4204	0.206641	0	0	0	0	0	0	0	0	0	0	0	0	0
Aco029640	0	0	0	0	0	0	0	0	0	0	0	0	0	0	0	0	0	0	0	0	0	0.638233	0	0	0	0	0	0	0	0	0	0	0	0	0	0
Aco016370	0.096198	0	0.298496	0	0	0	0	0	0	0	0	0	0	0	0	0	0	0	0	0	0	0	0	0	0	0	0	0	0	0	0.233109	0	0.113812	36.7205	25.9494	19.2246
Aco028808	0	0.177258	0.141267	0	0	0	0	0	0	0	0	0	0	0	0	0	0	0	0	0	0	0	0	0	0	0	0	0	0	0	3.17255	6.96312	14.3766	0	0	0
Aco007360	0	0	0	0	0	0	0	0	0	0	0	0	0	0	0	0	0	0	0	0	0	0	0	0	0	0	0	0.243971	0	0	0	0	0	0	0	0
Aco020418	0	0	0	0	0	0	0	0	0	0	0	0	0	0	0	0	0	0.209626	0	0	0	0	0	0	0	0	0	0	0	0	0	0	0	0	0	0
Aco030057	0	0	0	0	0	0	0	0	0	0	0	0	0	0	0	0	0.134158	0	0	0	0	0	0	0	0	0	0	0	0	0	0	0	0	0	0	0
Aco002011	0.280203	0	0.561178	0	0	0	0	0	0	0	0	0	0	0	0	0	0	0	0	0	0	0	0	0	0	0.125178	0	0	0	0	6.45795	5.4451	10.4426	0	0	0.190268
Aco013161	0	0	0	0	0	0	0	0	0	0	0	0	0	0	0	0	0	0	0	0	0.135913	0	0	0	0	0	0	0	0	0	0	0	0	0	0	0
Aco018757	0.239502	0.284549	1.20535	0	0	0	0	0	0	0	0	0	0	0	0	0	0	0	0	0	0	0	0	0	0	0	0	0	0	0	0	0	0	0	0	0
Aco020525	0	0	0	0	0	0	0	0	0	0	0	0	0	0	0	0.297184	0	0	0	0	0	0	0	0	0	0	0	0	0	0	0	0	0	0	0	0
Aco015639	0	0	0	0	0	0	0	0	0	0	0	0	0	0	0	0	0	0	0	0	0	0.497898	0	0	0	0	0	0	0	0	0	0	0	0	0	0
Aco022604	0	0	0	0	0	0	0	0	0	0	0	0	0	0	0	0	0	0	0	0	0	0	0	0	0	0	0	0	0	0.171345	0	0	0	0	0	0
Aco024441	0	0.160906	0	0	0	0	0	0	0	0	0	0	0	0	0	0	0	0	0	0	0	0	0	0	0	0	0	0	0	0	0	0	0	0	0	0
Aco029107	0	0	0	0	0	0	0	0	0	0	0	0	0	0	0	0	0	0	0	0	0	0	0	0.235386	0	0	0	0	0	0	0	0	0	0	0	0
Aco024616	0	0	0	0	0	0	0	0.108115	0	0	0	0	0	0	0	0	0	0	0	0	0	0	0	0	0	0	0	0	0	0	0	0	0	0	0	0
Aco012590	2.39253	0	0	1.11128	0	0	4.1642	0	0	3.18463	0	0.053646	1.38515	0	0	5.18656	0	0	0.764332	0.170714	0.184646	1272.21	65.3182	1.05632	0.048438	0	0.241658	0	0	0	0.190469	0	0	0.912273	0	0.242791
Aco013296	0.030444	0	0	0	0	0	0	0	0	0	0	0	0	0	0	0	0	0	0	0	0	0	0	0	0	0	0	0	0	0	0.185123	0.130212	0	2.93481	0.95339	2.47021
Aco011481	0	0	0	0	0	0	0	0	0	0	0	0	0	0.176988	0	0	0	0	0	0	0	0	0	0	0	0	0	0	0	0	0	0	0	0	0	0
Aco019614	0	0	0	0	0	0	0	0	0	0	0	0	0	0	0	0	0	0	0	0	0	0	0	0	0	0	0	61.6852	3.04103	0.784844	0	0	0	0	0	0
Aco013662	0.449533	0	0.344624	0.548126	0.628873	0.395432	1.73329	0.599749	0.58859	1.6653	0.330983	0.43676	0.950222	0.484599	0.564969	0.644601	0.418165	1.26859	1.20258	0.698831	1.6349	326.447	0.87395	0.232511	0.475473	0.411648	0.533998	0.49904	1.81117	0.60327	0.506701	0.310568	0.456476	0.891249	0.306495	0.718869
Aco026573	0	0	0	0	0	0	0	0	0	0	0	0	0	0	0	0	0	0	0	0	0	44.5362	0	0	0	0	0	0	0	0	0	0	0	0	0	0
Aco021642	0	0	0	0	0	0	0.359519	0	0	0	0	0	0	0	0	0	0	0	0	0	0	0	0	0	0	0	0	0	0	0	0	0	0	0	0	0
Aco029749	0	0	0	0	0	0	0	0	0	0	0	0	0	0	0	0	0	0	0	0	0.465117	0	0	0	0	0	0	0	0	0	0	0	0	0	0	0
Aco028220	0	0	0	0	0	0	0	0	0	0	0	0	0	0	0	0	0	0	0	0	0	0	0	0	0	0	0	0	0	0	0.266168	0.611203	0	0	0	0
Aco023963	0	0	0	0	0	0	0	0	0	0	0	0	0	0	0	0.350218	0	0	0	0	0	0	0	0	0	0	0	0	0	0	0	0	0	0	0	0
Aco026294	0	0	0	0	0	0	0	0	0.260332	0	0	0	0	0	0	0	0	0	0	0	0	0	0	0	0	0	0	0	0	0	0	0	0	0	0	0
Aco021066	0	0	0	0	0	0	0	0	0	0	0	0	0	0	0	0	0	0	0	0	0	0.429785	0	0	0	0	0	0	0	0	0	0	0	0	0	0
Aco005249	0	0	0	0	0	0	0	0	0	0	0	0	0	0	0	0	0	0	0	0	0	0	0	0	0	0	0	0	0	0	0	1.24082	0	0	0	0
Aco031759	0	0	0	0	0	0	0	0	0	0	0	0	0	0	0	0	13.2697	0	0	0	0	0	0	0	0	0	0	0	0	0	0	0	0	0	0	0
Aco029048	0	0	0	0	0	0	0	0	0	0	0	0	0	0	0	0	0	0	0	0	0	0	0	0	0	0	0	0	0	0	0.310076	0.285126	0	0	0	0
Aco010592	0	0	0	0	0.490871	0	0	0	0	0	0	0	0	0	0	0	0	0	0	0	0	0	0	0	0	0	0	0	0	0	0	0	0	0	0	0
Aco014370	5.80188	4.08296	3.56971	3.35016	3.26733	4.02033	3.31371	0.993129	0.185778	3.13896	0.592102	0.27529	1.81078	1.25122	0.511609	4.8815	0.831292	0.337464	0.400888	0.757707	0.449132	532.163	27.7618	3.3751	2.48355	0.190336	0.97231	0.20839	0	0.312248	0.88224	0.127394	0.626355	1.19688	0.565205	0.939204
Aco007948	0	0	0	0	0	0	0	0	0	0	0	0	0	0	0	0	0	0	0	0	0	8.80696	0	0	0	0	0.174614	0	0	0	0	0	0	0	0	0
Aco012125	0	0	0	0	0	0	0	0	0	0.31224	0	0	0.10937	0	0.044893	0	0.046435	0	0	0	0.098566	91.1846	3.75573	0	0.096925	0	0	0	0	0	0	0	0	0	0	0
Aco028373	0	0	0	0.165322	0	0	0	0	0	0	0	0	0	0	0	0	0	0	0	0	0	0	0	0	0	0	0	0	0	0	0	0	0	0	0	0
Aco016153	0	0	0	0	0	0	0	0	0	0	0	0	0	0	0	0	0	0	0	0	0	0	0	0	0	0	0	0	0	0	0	0	0.312986	0	0	0
Aco027183	0	0	0	0	0	0	0	0	0	0	0	0	0	0	0	0	0	0	0	0	0	0	0	0	0	0	0	0	0	0	0	0	0	0.204133	0	0
Aco004846	1.31589	2.35549	0.680669	0	0.307254	2.92964	0	1.92569	3.93569	0	0	0	0	0.636172	0.119268	0	0.165065	0	0	0.474592	0	0	0	0	0	0.898009	0	0	0.182816	0	0	1.66204	0.439422	34.7116	27.5559	147.263
Aco013693	0	0	0	0	0	0	0	0	0	0	0	0	0	0	0	0	0	0	0	0	0	0	0	0	0	0	0	0	0	0	0.353846	0	0	0	0	0
Aco027615	0	0	0	0	0.172924	0	0	0	0	0	0	0	0	0	0	0	0	0	0	0	0	0	0	0	0	0	0	0	0	0	0	0	0	0	0	0
Aco013522	0	0	0	0	0	0	0	0	0	0	0	0	0	0	0	0	0	0	0	0	0	7.70851	0	0	0	0	0	0	0	0	0	0	0	0	0	0
Aco012985	0	0	0	0	0	0	0	0	0	0	0	0	0	0	0	0	0	0	0	0	0	5.6456	0.398719	0	0	0	0	0	0	0	0	0	0	0	0	0
Aco029774	0	0.419432	0.41639	0	0	0	0	0	0	0	0	0	0	0	0	0	0	0	0	0	0	0	0	0	0	0	0	0	0	0	0	0	0	0	0	0
Aco025638	0	0	0	0	0	0	0	0	0	0	0	0	0	0	0	0	0	0	0	0	0	0	0	0	0	0	0	0	0	0	0	0.247703	0	0	0	0
Aco004283	0.686068	0	3.30371	0.605825	0.587803	2.97844	0	0.314596	0	0	0	0	0	0	0	0	0	0	0	0.2901	0	3.77437	0.167773	0	0	0	0.155947	0.104636	0	0	138.436	127.342	154.692	0.229021	0.113626	0.13363
Aco017621	0	0	0	0	0	0	0	0	0	0	0	0	0	0	0	0	0	0	0	0	0	0	0	0	0	0	0	0	0	0	0	0	0	0.57132	0	0
Aco029579	0	0.157635	0.059975	0	0.07958	0	0	0	0	0	0	0	0	0	0	0	0	0	0	0	0	0	0	0	0	0	0	0	0	0	0.826177	1.80461	3.89702	0	0	0
Aco018442	3.65895	1.44993	1.12674	5.37063	1.95326	3.00607	0.467555	0.180945	0	0.16931	0	0	0	0	0.324624	0	1.03798	0	0.318002	1.53094	0	0	0	0	0.175448	0.487787	0.818503	0	0	0	110.222	69.2808	181.685	4.219	1.53294	9.0328
Aco029441	0	0.182747	0.451703	0	0	0	0	0	0	0	0	0	0	0	0	0	0	0	0	0	0	0	0	0	0	0	0	0	0	0	0	0	0	0	0	0
Aco024079	0	0	0	0	0	0	0	0	0	0	0	0	0	0	0.223356	0	0	0	0	0	0	0	0	0	0	0	0	0	0	0	0	0	0	0	0	0
Aco028138	0	0	0	0	0	0	0	0	0	0	0	0	0	0	0	0	0	0	0	0	0	0	0	0	0	0	0	0	0	0	0	0	0	0.291905	0	0
Aco025724	0.076325	0	0	0	0	0	0	0	0	0	0	0	0	0	0	0	0	0	0	0	0	4.05311	0	0	0	0	0	0	0	0	0	0	0	0	0	0.086258
Aco013302	0.111444	0	0	0	0	0	0	0	0	0	0	0	0	0	0	0	0	0	0	0	0	0	0	0	0	0	0	0	0	0	0	0	0	0	0	0
Aco019872	0	0	0	0	0	0	0	0	0	0	0	0	0	0	0	0	0	0	0	0	0	0	0.204553	0	0	0	0	0	0	0	0	0	0	0	0	0
Aco014479	0.040918	0	0	0	0	0	0	0	0	0	0	0	0	0	0	0	0	0	0.239165	0	0	7.68656	0	0	0	0	0.259207	0	0	0	0	0	0	0	0.062151	0.277455
Aco000005	0	0	0	0	0	0	0	0	0	0	0	0	0	0	0	0.194569	0	0	0	0	0	0	0	0	0	0	0	0	0	0	0	0	0	0	0	0
Aco018838	0	0	0	0	0	0	1.16256	0	0	0.292782	0	0	0	0	0	0.581659	0	0	82.0446	0	0	2.01079	4.65188	0	0	0	0	0	0	0	0	0	0	0	0	0
Aco025621	0	0	0	0	0	0	0	0.031413	0	0	0	0	0	0	0	0	0.220527	0.247419	0	0	0	0	0	0	0	0	0	0	0	0	0	0	0	0	0	0
Aco028942	0	0	0	0	0	0	0	0.416879	0	0	0	0	0	0	0	0	0	0	0.310011	80.0579	0	0	0	0	0	0	0	0	0	0	0	0	0	3.5315	1.56471	0.882107
Aco015204	0	0	0	0	0	0	0	0	0	0	0	0	0	0	0	0	0	0	0	0	0	0	0	0	0	0	0	0	0	0	0.160336	0	0.087296	0	0	0
Aco022193	0	0	0	0	0	0	0	0	0	0	0	0	0	0	0	0	0	0	0	0	0	0.342354	0	0	0	0	0	0	0	0	0	0	0	0	0	0
Aco017492	0	0	0	0	0	0	1.23786	0	0	0	0	0	0	0	0	0	0	0	0	0	0.088756	1432.34	152.184	0	0	0	0	0	0.208045	0	0.095168	0	0	0	0	0
Aco029139	0	0	0	0	0	0	0	0	0	0	0	0	0	0	0	0	0	0	0	0	0	0.726794	0	0	0	0	0	0	0	0	0	0	0	0	0	0
Aco008346	0	0	0.104497	0	0	0.114667	0	0	0	0.141182	0.105014	0	0	0	0	0	0.101793	0	0	0.233556	0	57.0447	0.477934	2.16296	0.483837	0.788525	0	0	0	0	0	0	0	0.204102	0	0.444728
Aco027129	0	0	0	0.052669	0.150576	0	0	0	0	0	0	0	0	0	0	0	0	0	0	0	0	0	0	0	0	0	0	0	0	0	0	0	0	0	0	0
Aco022827	0.311057	0	0	0	0	0	0	0	0	0	0	0	0	0	0	0	0	0	0	0	0	0	0	0	0	0	0	0	0	0	0	0	0	0	0	0
Aco019205	0	0	0	0.213061	0	0	0	0	0	0	0	0	0	0	0	0	0	0	0	0	0	0	0	0	0	0	0	0	0	0	0	0	0	0	0	0
Aco027422	0	0	0	0	0	0	0	0	0	0	0	0	0	0	0	0	0	0	0	0	0	0.427479	0	0	0	0	0	0	0	0	0	0	0	0	0	0
Aco013217	6.56506	0	0.084993	7.09982	0.279092	0.659496	13.9213	0	0	11.8212	0	0.309432	0.839885	0	0	10.6605	1.0239	0.285283	3.20991	0	0	2483.1	159.411	2.58567	0.296107	0.615979	0	0	0	0.919296	0	0	0.531698	5.42778	0	1.11918
Aco017754	0	0	0	0	0	0	0	0	0	0	0	0	0	0	0	0.160014	0	0	0	0	0	0	0	0	0	0	0	0	0	0	0	0	0	0	0	0
Aco015770	0	0	0	0	0	0	0	0	0	0	0	0	0	0	0	0	0	0	0	0	0	0	0	0	0	0	0	0	0	0	0	0	0	0.26662	0	1.65698
Aco021037	0	0	0	0	0	0	0	0	0	0	0	0	0	0	0	0	0	0	0	0	0	0	0	0	0	0	0	0	0	0	0	0	0	0.107501	0	0
Aco028898	0.416486	0	0.429683	0	0	0	0	0	0	0	0	0	0	0	0	0	0	0	0	0	0	0	0	0	0	0	0	0	0	0	0	0	0	0	0	0
Aco019213	0	0	0	0	0	0	0	0	0	0	0	0	0	0	0	0	0	0	0	0	0	0.324835	0	0	0	0	0	0	0	0	0	0	0	0	0	0
Aco026251	0	0	0.12259	0	0	0	0	0	0	0	0	0	0	0	0	0	0	0	0	0	0	0	0	0	0	0	0	0	0	0	0	0	0	0	0	0
Aco016791	0	0	0	0	0	0	0	0	0	0	0	0	0	0	0	0	0	0	0	0	0	0	0	0	0	0	0	0	0	0	0	8.14946	11.3249	0	0	0
Aco016516	0	0	0	0	0	0	0	0	0	0.478129	0	0	0.058723	0	0	0	0	0.042718	0	4.61762	0	283.087	12.5809	0	0	0	0.06094	0	0	0.413639	0	0	0	1.2797	0	0.448864
Aco016596	0.100187	0	0	0	0	0	0	0	0.179361	0	0	0	0	0	0	0	0	0	0	0	0	5.35832	0	0	0	0	0	0	0	0	0	0	0	0	0	0
Aco008218	0	0	0	0	0	0	0	0	0	0	0	0	0.338076	0	0	0	0	0	0	0	0	0	0	0	0	0	0	0	0	0	0	0	0	0	0	0
Aco030473	0	0	0	0	0	0	0	0	0	0	0	0	0	0	0	0	0	0	0.433018	0	0	0	0	0	0	0	0	0	0	0	0	0	0	0	0	0
Aco017129	0	0	0	0	0	0	0	0	0	0	0	0	0.040295	0	0	0.026163	0	0	0	0	0.135921	39.0388	0.852711	0	0	0	0.038353	0	0	0	0	0	0	0	0.034845	0
Aco014013	0	0	0	0	0	0	0	0	0	0	0	0	0	0	0	0	0	0	0	0	0	0	0	0	0	0	0	0	0	0	0	0	0	1.95363	0	0
Aco030245	0	0	0	0	0	0	0	0	0	0	0	0	0	0	0	0	0	0	0	0	0	0	0	0	0	0	0	0	0	0	0	0	0	5.31839	0	0
Aco003027	0	0	0	0	0	0	0	0	0	0	0	0	0	0	0	0	0	0	0	0	0	0	0	0	0	0	0	0	0	0	0	0	0	0.134461	0	0.334589
Aco003192	0	0	0	0	0	0	0	0	0	0	0	0	0	0	0	0	0	0	0	0	0	0	12.1726	0	0	0	0	0	0	0	0	0	0	0	0	0
Aco020315	0	0	0	0	0	0	0	0	0	0	0	0	0	0	0	0	0	0	0	0	0	1.00927	0	0	0	0	0	0	0	0	0	0	0	0	0	0
Aco023878	0	0	0	0	0	0	0	0	0	0	0	0	0	0	0	0	0	0	0	0	0	0	0	0	0	0	0.569677	0	0	0	0	0	0	0	0	0
Aco021822	0	0	0	0	0	0	0	0	0	0	0	0	0	0	0	0	0	0	0	0	0	0	0	0	0	0	0	0	0	0	0	0	0.618927	0	0	0
Aco004129	0.205457	0	0	0	0	0	0.175209	0	0	0.270971	0	0	0	0	0	0	0	0	0	0	0	159.404	2.69141	0	0	0	0	0	0	0	0	0	0	0.11915	0	0.152423
Aco002813	0	0	0	0	0	0	0	0	0	0	0	0	0	0	0	0	0	0	0	0	0	0.384997	0	0	0	0	0	0	0	0	0	0	0	0	0	0
Aco031849	0	0	0	0	0.007249	0	0	0	0	0	0	0	0	0	0	0	0	0	0	0	0	0	0	0	0.128508	0	0	0	0	0	0	0	0	0	0	0
Aco021222	0	0	0	0	0	0.735183	0	0	0	0	0	0	0	0	0	0	0	0	0	0	0	0	0	0	0	0	0	0	0	0	0	0	0	0	0	0
Aco017217	0	0	0	0	0	0	0	0	0	0	0	0	0	0.175173	0	0	0	0	0	0	0	0	0	0	0	0	0	0	0	0	0	0	0	0	0	0
Aco026410	0	0	0	0	0	0	0	0	0	0	0	0	0	0	0	0	0	0	0	0	0	0	0	0	0	0	0	0	0	0	0	0.202581	0	0	0	0
Aco031502	0	0	0	0	0	0	0	0	0	0	0	0	0	0	0	0	0	0.150171	0	0	0	0	0	0	0	0	0	0	0	0	0	0	0	0	0	0
Aco031863	0	0	0	0	0	0	0	0	0	0	0	0	0	0	0	0.551379	0	0	0	0	0	0	0	0	0	0	0	0	0	0	0	0	0	0	0	0
