# Supplementary material for: Comprehensive tissue-specific transcriptome profiling of pineapple (Ananas comosus) and building an eFP-browser for further study
Source: PeerJ. 2018 Dec 4;6:e6028. doi: 10.7717/peerj.6028 (PMC6284516; doi:10.7717/peerj.6028)
Supplement: Supplemental Information 12 [file peerj-06-6028-s012.xlsx]

## Sheet: Sheet1
Table S6. Co-expressing Analysis Result of the Pineapple Transcriptome during Fruit Development
GeneID	kTotal	kWithin	kOut	kDiff	kME	kME-pvalue	ModuleColor	Bract_1	Bract_2	Bract_3	Sepal_1	Sepal_2	Sepal_3	Flower_disk_1	Flower_disk_2	Flower_disk_3	Receptacle_1	Receptacle_2	Receptacle_3	Ovary_wall_1	Ovary_wall_2	Ovary_wall_3	Placenta_1	Placenta_2	Placenta_3	Ovule_1	Ovule_2	Ovule_3	Stamen_1	Style_1	Core_1	Core_2	Core_3	Petal_1	Stem_1	Stem_2	Stem_3	Leaf_1	Leaf_2	Leaf_3	Root_1	Root_2	Root_3
Aco001924	146.059	44.9811	101.078	-56.0968	0.93868	2.72714e-17	salmon	33.13	27.3862	25.6789	33.8061	25.9067	23.1149	30.0481	20.3034	15.1761	34.0318	16.5105	16.5915	29.4474	18.7934	15.0134	25.1047	15.5901	17.2833	32.5772	16.2094	14.548	31.6024	37.1372	24.7214	16.7244	18.3868	34.0724	26.0882	21.4952	15.6021	15.8285	12.1743	12.0381	17.5923	18.6145	15.4029
Aco030253	66.9525	25.2774	41.6751	-16.3977	0.870142	5.5012e-12	salmon	40.388	41.6102	34.1098	36.1418	30.0016	24.9605	33.5824	31.3019	18.03	58.6076	32.1634	20.1886	40.0471	30.5032	13.8832	27.4099	22.6248	13.3595	59.4035	15.2718	8.92767	28.9404	42.853	47.484	29.8093	26.3175	46.0829	27.6669	18.6636	12.0694	4.40217	4.29701	3.38204	13.7075	27.5372	16.75
Aco022758	29.2865	11.1173	18.1692	-7.05193	0.796473	6.26386e-09	salmon	34.4771	28.703	19.2276	36.4372	22.9231	16.6618	24.7731	17.556	14.5654	42.7559	19.0009	14.9985	33.0939	23.684	14.1721	28.5063	21.45	14.1616	34.5436	23.3669	22.2403	16.1197	28.3823	27.248	12.4631	21.0051	30.7384	30.8852	25.705	21.1183	11.867	18.3847	14.0329	21.8953	27.3739	26.1183
Aco014889	119.402	23.4017	96.0005	-72.5988	0.843913	1.01573e-10	salmon	39.465	22.6892	14.7958	35.6988	16.4554	15.7964	38.1799	16.2596	11.1073	22.3343	4.46982	3.87067	22.1723	12.8359	3.59785	19.9735	10.0767	3.8386	34.4496	6.4181	5.11764	28.9878	43.9409	11.5713	9.31828	1.77796	38.9878	5.22751	2.40884	3.40921	1.40749	2.99054	1.30925	11.067	12.8859	11.1282
Aco007521	19.5796	8.15727	11.4223	-3.26508	0.771086	3.73689e-08	salmon	3.22613	2.64061	0.998073	3.51579	1.05208	0.70146	2.4621	0	0	3.05502	0.69049	0	3.87688	0.386721	0.372322	1.54666	0.517692	0.235656	1.97691	1.22111	0.554269	0.556517	1.4163	2.147	0.184285	1.43257	1.43336	0.388187	1.15294	0	0.720604	0	0.518447	1.78607	1.36144	1.77626
Aco004510	88.6124	33.6802	54.9322	-21.2519	0.899787	8.5072e-14	salmon	64.478	53.487	40.3756	63.2216	50.0965	41.9635	59.7378	30.5651	19.3872	62.0352	28.7055	21.5841	50.5615	28.8196	17.0337	41.6009	21.2127	16.3971	35.6947	18.9232	9.795	37.9245	43.1162	29.0419	20.8698	17.551	52.1705	22.9638	11.7572	13.5116	8.58639	6.15208	9.06515	13.3985	13.6685	12.1475
Aco020092	27.0894	17.9886	9.10085	8.88774	0.650133	1.77408e-05	salmon	0.165435	0	0	0.517766	0	0	1.38247	0	0	5.47268	0	0	1.62731	0	0	1.34639	0.128147	0	0.538853	0	0	0.305845	0	0	0	0	3.32331	0	0	0	0	0	0	0	0	0
Aco018695	45.6062	17.3944	28.2118	-10.8175	0.849018	6.01523e-11	salmon	26.4509	27.1619	21.8825	32.4254	21.4173	16.285	26.4715	13.1718	7.02318	34.5046	20.9059	16.4949	27.3037	17.7081	12.3903	31.2768	14.5582	12.988	26.1553	13.6162	11.312	24.1813	26.8297	23.8759	8.04236	24.0271	24.9436	30.1667	15.5374	10.4477	11.1231	14.3062	13.6193	22.9827	14.7157	18.8418
Aco012229	24.8165	8.64768	16.1688	-7.52109	0.729838	4.39989e-07	salmon	31.6921	40.8442	36.8205	24.569	31.9719	33.4875	29.5826	27.818	17.5462	46.9753	22.2577	16.8506	38.5602	28.5874	19.1733	24.6608	23.4021	22.7424	34.204	42.911	21.9612	48.7046	32.038	21.826	15.8418	22.2783	37.5471	23.9789	18.5487	19.2596	18.682	14.6619	14.3954	27.3811	21.1553	26.8638
Aco022560	74.0103	30.0638	43.9465	-13.8828	0.885251	7.5796e-13	salmon	252.053	130.608	97.7874	264.833	118.932	94.9683	269.016	105.547	98.461	290.256	60.0569	81.7957	153.723	42.22	73.138	148.601	26.911	35.7652	106.619	42.0719	15.0737	72.2127	201.58	161.185	111.893	74.7497	277.012	177.205	82.5331	48.6465	2.10348	2.5216	1.37801	26.8709	50.0527	30.6536
Aco005601	55.6706	8.74987	46.9207	-38.1708	0.714073	1.00731e-06	salmon	138.388	78.9936	17.1366	145.434	55.981	16.1699	166.528	49.4761	0.236681	26.0416	17.2118	0.266087	73.2724	49.2852	0.223731	45.1066	12.8195	2.50597	55.972	4.89621	0.569269	73.2663	233.191	0	0	0	131.938	0	0.113224	0.296527	0.473383	0.29538	0.50396	0	0	0.464483
Aco012861	99.6026	25.0314	74.5712	-49.5398	0.894606	1.92353e-13	salmon	76.056	68.3136	60.5032	74.0436	69.5831	56.4399	96.1893	54.2223	50.1851	86.7519	60.6412	59.2431	82.7004	50.1731	51.0578	69.0203	55.7556	50.0266	67.1577	49.7308	46.2069	65.7685	82.9031	68.1303	45.9277	62.7393	92.4768	65.3627	53.5138	46.3658	54.2537	42.1181	56.2707	63.5775	56.1632	53.1268
Aco017426	78.2339	39.4686	38.7652	0.703427	0.894187	2.05098e-13	salmon	39.6715	34.5127	30.761	30.7382	24.9909	22.9424	26.768	23.802	20.8956	41.2107	21.9989	18.1433	30.6479	22.7819	16.4266	18.1619	16.4709	16.4331	27.4275	24.1543	16.2419	33.8942	35.4225	36.2327	15.3751	33.1433	35.298	22.9473	19.0975	15.5941	14.878	15.9869	15.5087	22.0715	23.3832	20.2944
Aco020634	21.4471	10.6968	10.7504	-0.0536276	0.664495	9.88646e-06	salmon	7.70768	5.51524	6.24187	8.87086	5.95276	4.9818	14.1832	5.21037	3.40124	34.0881	6.51143	3.46367	13.1606	4.57177	2.64577	11.5844	5.05524	2.05241	14.5798	5.35194	4.2779	3.98375	7.79063	9.27586	1.87094	3.81856	9.90637	8.6861	5.25616	3.58497	3.98476	7.09683	10.5183	4.61228	4.45781	5.15474
Aco005527	55.4088	19.0696	36.3392	-17.2696	0.712307	1.10147e-06	salmon	1.176	0	0	1.29186	0.10401	0	4.62507	0.123028	0	4.58322	0.33278	0.37961	1.85795	0	0	1.3407	0	0	0.69749	0	0	0.130422	0.8163	0	0	0	4.43793	0	0.153991	0	0	0.120544	0	0	0	0
Aco000410	102.176	45.7174	56.4587	-10.7413	0.921168	1.70244e-15	salmon	265.155	218.595	164.392	238.956	150.081	131.474	245.52	108.964	92.3697	243.031	107.727	92.8107	170.607	116.904	87.7578	164.681	118.758	75.6778	186.181	109.256	86.3615	287.874	235.967	228.013	98.0661	161.39	244.466	135.924	66.4299	61.842	75.8335	60.6152	68.3466	162.146	143.273	123.469
Aco005157	49.7909	12.59	37.2009	-24.6109	0.805033	3.23934e-09	salmon	135.682	114.524	112.835	124.803	109.364	100.525	149.82	99.9716	87.8872	167.911	83.1051	89.0854	133.643	85.2666	83.8127	110.415	88.8683	89.9621	112.832	110.704	88.3765	76.9943	110.865	138.85	109.742	116.024	137.122	144.698	112.377	99.0538	45.1815	34.4162	36.8475	88.9437	85.2707	85.4434
Aco021690	22.2247	4.31778	17.9069	-13.5891	0.617074	6.11176e-05	salmon	22.7716	21.1388	16.6672	23.4324	20.6545	18.1436	19.9686	15.8354	14.5282	21.0788	14.9189	16.5468	19.5125	15.3649	13.646	18.264	19.6674	16.8904	21.6044	24.2503	20.0817	24.2107	15.7763	17.4032	12.4072	22.2169	18.6372	19.9389	12.9589	15.6993	10.5604	10.3185	10.9935	19.6566	20.5339	20.3429
Aco011327	90.5655	38.6729	51.8926	-13.2197	0.922444	1.30298e-15	salmon	204.696	133.715	124.836	167.046	112.45	112.648	180.455	94.9309	58.4577	193.422	43.1513	41.2625	132.74	36.5671	34.1594	87.6194	25.2813	21.3714	87.9458	39.0282	10.3928	78.2149	196.633	131.967	69.5768	64.546	204.099	98.8613	47.1627	33.9542	3.58553	1.71449	2.47253	32.1382	35.828	23.3618
Aco015683	112.18	58.6341	53.5455	5.08856	0.962811	6.67478e-21	salmon	29.4774	23.3145	18.1818	24.6208	19.7128	15.1063	22.3102	17.6412	12.6913	35.5218	15.3485	12.1306	22.2469	15.6249	11.6436	18.2659	14.052	12.752	24.799	19.612	12.8777	25.2074	25.3189	26.7827	12.9867	19.8439	26.9341	20.2243	12.1858	10.4956	10.794	8.749	9.18862	17.58	16.8819	16.019
Aco015349	26.5729	10.9475	15.6253	-4.67782	0.677487	5.66703e-06	salmon	45.9149	16.75	9.76291	50.7486	19.5603	9.24276	16.9049	22.0709	3.78809	12.0273	1.33764	0.991612	10.8928	1.56529	2.04345	10.4379	2.61123	2.17122	16.345	2.94019	0.606157	14.3871	19.8778	5.88673	2.97131	0.395347	18.2852	4.54462	1.00731	1.10891	2.81382	2.80123	3.49659	0.143763	0.08821	0.074525
Aco006168	77.8293	30.7366	47.0927	-16.3561	0.892572	2.61953e-13	salmon	126.879	122.286	106.159	93.5548	93.5405	85.9979	95.0416	72.9707	55.7294	132.515	79.8091	52.6937	103.515	89.8392	51.193	101.044	70.3815	53.5167	94.1838	66.848	52.9887	114.504	131.381	104.486	66.4915	61.8293	109.65	74.8563	81.1418	68.74	50.312	37.8652	45.4991	51.1397	61.7912	55.1569
Aco014085	46.8098	14.1146	32.6952	-18.5806	0.739793	2.53104e-07	salmon	129.352	122.381	88.6136	113.588	86.2761	72.0601	102.161	66.7683	46.1889	125.363	84.6901	54.7345	98.1511	76.6299	53.7154	103.869	83.3756	64.0425	98.0438	141.939	77.3242	104.333	94.9814	108.933	43.7705	102.646	103.991	76.0327	40.8176	52.5238	59.0105	47.9615	48.0599	105.907	102.552	102.888
Aco007481	79.6646	23.253	56.4116	-33.1587	0.858343	2.19438e-11	salmon	61.3796	54.8653	39.8682	58.4447	43.4534	42.1776	63.5038	36.3442	22.8825	80.398	31.2964	22.1836	58.2614	37.1346	15.8682	57.2949	31.7794	20.6358	66.3068	27.1915	22.3641	70.5419	62.8836	68.0866	39.0224	30.5905	62.0678	57.9236	54.1449	57.6119	10.407	8.94946	9.53996	32.8138	45.517	40.1556
Aco011169	47.104	17.1117	29.9923	-12.8806	0.818268	1.09364e-09	salmon	67.0052	45.9242	45.6144	61.678	42.2151	50.8408	70.2091	52.4238	18.6525	88.6521	30.105	5.52238	70.3689	40.4762	8.32013	68.7643	26.4434	10.14	30.1289	13.753	4.64534	8.05571	59.4065	23.9067	3.76001	4.8476	74.0557	0.336091	0.594511	0.268672	0.07259	0.234705	0.18454	3.99994	8.41053	4.86265
Aco008862	105.905	47.6526	58.2529	-10.6003	0.939529	2.16604e-17	salmon	202.943	157.685	103.178	181.362	137.195	92.7383	162.024	91.0488	62.7384	170.849	91.8811	50.4998	125.775	90.3597	53.5129	131.942	85.0642	59.5194	159.079	92.3643	60.6894	129.452	159.068	156.381	65.9186	96.5097	142.531	101.648	77.215	68.9707	47.1796	49.7188	55.9522	72.3654	89.7791	82.8345
Aco020372	66.8207	24.601	42.2197	-17.6187	0.861738	1.49323e-11	salmon	22.4726	22.8907	13.715	19.9649	18.2692	11.7785	22.5482	14.0826	5.26882	26.894	20.6575	10.414	21.7801	16.304	6.08326	15.5564	13.5301	7.0164	24.2691	18.249	4.79914	17.1922	32.9361	36.776	8.9845	14.9961	31.3331	14.0434	5.10243	6.80291	1.03342	0.299453	0.168219	7.49038	5.96148	6.59318
Aco024528	63.4892	19.4821	44.0071	-24.525	0.843082	1.10424e-10	salmon	20.4266	13.4223	15.3853	18.6509	14.0006	14.2889	17.6745	9.31048	9.84223	14.6086	6.62357	7.98576	15.2854	4.38067	7.01563	15.0217	4.06874	6.25627	14.4658	8.80939	6.22358	20.9575	12.9521	8.48947	7.28888	5.11707	20.5331	8.73235	7.10193	4.2877	2.27288	2.05581	1.90399	5.96648	8.40855	3.95288
Aco015338	7.1489	3.46915	3.67975	-0.210594	0.572695	0.000262149	salmon	21.0424	9.09309	3.97364	38.2892	11.5596	3.45395	16.6599	5.31314	1.26651	8.30138	1.35131	0.272004	2.97197	1.87842	0.319903	3.03018	1.55887	0.738542	6.4724	1.71482	0	11.1467	9.01368	1.04073	1.35794	0.854108	11.6673	27.7625	7.85511	2.80654	0.907767	1.28132	1.63136	2.74693	6.7879	4.47247
Aco008514	16.8761	2.43412	14.442	-12.0079	0.596008	0.000125296	salmon	23.9482	15.2163	24.1673	15.8623	17.5984	22.9249	19.2971	15.7444	16.0526	19.5482	17.1819	19.9068	15.2685	11.2072	15.162	15.0248	6.84356	8.46231	16.8892	1.923	7.14393	17.4843	21.1658	13.3033	10.0121	13.0722	25.4724	5.92195	9.83345	7.54425	9.73326	9.03613	9.98208	4.14698	6.22632	5.89729
Aco017566	24.6439	9.48231	15.1615	-5.67923	0.71346	1.0391e-06	salmon	163.864	92.4628	72.9794	146.506	90.5665	69.5734	101.042	112.545	69.7386	123.618	34.7053	48.6228	69.54	31.7373	48.6865	34.9199	18.2318	25.5637	28.6515	29.1249	5.87995	27.7153	97.5038	95.425	70.7508	36.295	120.68	152.051	69.4576	36.6932	2.01451	1.32652	1.02544	25.1852	39.6419	27.0154
Aco016392	31.4964	13.3165	18.18	-4.86348	0.782505	1.72324e-08	salmon	4.76434	5.35644	4.53317	5.10616	4.18031	3.53321	4.43066	4.16997	2.94936	12.6538	5.36814	4.1715	8.74222	6.1272	3.71738	4.34109	2.54406	3.06824	5.71774	2.21099	2.3646	8.06873	5.75808	9.53197	3.71809	7.14662	8.04029	5.5613	1.78668	1.81648	2.0332	1.17739	0.920166	1.69231	1.70112	1.8741
Aco007098	34.3997	9.825	24.5747	-14.7497	0.689982	3.23079e-06	salmon	52.6482	60.055	46.7803	50.8	48.3306	38.533	49.9408	43.3516	31.9589	66.1178	40.6411	29.2138	63.266	50.0332	32.5558	39.1983	36.9034	42.3859	53.9504	60.3798	45.5856	50.7121	48.6678	49.0866	29.4366	56.1177	55.3989	54.6766	42.1566	36.8308	28.889	27.505	28.1746	65.0013	53.1674	57.36
Aco012066	53.6535	28.4768	25.1767	3.30005	0.806641	2.85149e-09	salmon	176.561	179.46	153.683	140.055	133.677	112.349	144.511	98.5995	95.572	209.163	107.067	100.591	145.543	117.504	88.4758	74.7507	86.5205	109.44	123.055	103.243	85.8587	230.552	179.415	206.312	73.386	187.75	200.544	146.344	100.25	83.8247	71.204	64.837	64.4112	139.576	124.513	115.46
Aco011548	65.08	25.7206	39.3594	-13.6388	0.849912	5.47691e-11	salmon	30.2692	30.5127	25.2476	25.9808	27.3532	23.3788	28.0067	28.3666	24.4522	34.5126	25.2152	21.5448	28.1747	26.1637	20.21	22.0136	19.2571	22.998	33.8272	22.0515	20.4562	33.1859	35.2841	30.666	16.2587	28.1709	37.4286	25.2106	26.7008	19.5719	17.9183	17.1987	15.4847	25.3284	24.0019	21.9298
Aco007663	8.06197	2.58798	5.474	-2.88602	0.664191	1.0013e-05	salmon	3.95409	3.39095	2.63138	3.27209	1.94783	2.14807	3.18624	1.36184	1.73584	3.80539	1.07167	2.00419	3.97338	1.63131	1.335	2.78828	1.0575	2.26163	3.23013	0.827338	2.01812	2.17087	2.11345	5.50139	0.587904	3.37713	3.1216	2.89337	2.82073	1.57292	0.969959	2.0138	2.64283	1.99167	2.52968	1.76475
Aco011450	81.0205	33.3833	47.6373	-14.254	0.873045	3.8338e-12	salmon	45.3672	45.8849	43.4011	38.8538	38.8339	36.962	51.3134	38.1053	32.5013	68.276	33.958	27.1958	60.5216	41.7823	24.2204	44.7363	33.0581	31.0401	51.0058	38.866	28.9618	50.1132	51.2311	57.5896	26.8238	51.9071	52.1748	42.8205	24.8914	23.19	14.6003	15.5121	13.5112	45.6566	39.1716	39.0981
Aco022768	18.3528	4.65395	13.6988	-9.0449	0.721896	6.7249e-07	salmon	2.02458	1.23438	0.460816	1.82466	1.09905	1.13425	1.76751	0.973754	1.41765	2.11884	1.51359	0.532794	1.74791	0.86382	1.06083	1.65718	0.908929	0.610268	1.82961	0	0	2.66747	1.44559	1.96231	0.969502	0.643187	1.74091	1.92319	0.823717	0	0	1.02961	0.423801	1.74129	1.16197	1.12707
Aco026133	2.06373	0.881095	1.18263	-0.301535	0.541664	0.000645292	salmon	2.29124	3.00644	2.69971	2.26327	1.33669	0	0	2.57234	0.537516	7.69452	2.4002	1.05424	1.36124	1.79129	0	1.48635	1.10093	0.682795	3.01678	3.7389	0.477029	2.80848	1.34539	1.10518	0	1.07397	1.8531	0.677096	1.90713	1.40081	0.32515	1.85981	0	0.516369	1.52518	1.75405
Aco005182	56.3039	14.6851	41.6188	-26.9337	0.794051	7.50662e-09	salmon	170.981	177.262	153.165	142.778	127.702	123.54	118.745	63.851	31.0373	130.237	39.9241	29.3507	102.857	56.0414	30.8455	90.7374	35.1735	24.586	89.632	48.6534	13.7738	123.158	250.903	88.9892	55.6342	61.1494	341.92	59.7232	23.2086	56.7101	16.3876	3.10225	3.12575	33.9692	26.0628	21.761
Aco006671	1.16061	0.305562	0.855048	-0.549487	0.300964	0.0744779	salmon	56.248	39.4582	52.8196	65.1282	54.5284	54.0552	42.5119	39.6256	54.1757	64.0872	42.4337	40.6247	45.5254	27.2204	40.9083	61.4011	35.6344	32.4298	35.5461	39.8532	42.0164	16.2565	36.6642	38.5248	41.3961	35.7955	46.7069	86.6334	51.384	41.0384	37.4058	32.8825	40.7489	46.1958	38.9743	34.9777
Aco003459	20.7169	4.73862	15.9783	-11.2397	0.717931	8.26701e-07	salmon	6.09256	6.35462	5.70602	7.41396	5.52985	7.80092	9.97741	5.44781	3.6552	8.52096	5.31466	2.13797	8.75547	7.07712	1.15217	8.7967	5.49791	2.30241	7.3461	3.58686	1.48437	3.33744	7.2061	8.47034	3.8097	1.23675	9.07027	2.48714	1.39502	4.44505	0.271114	0.602774	1.31982	6.12349	7.82223	8.01601
Aco007271	13.4094	3.3451	10.0643	-6.71921	0.513555	0.00135818	salmon	22.7337	8.32024	7.8582	24.0298	12.8097	6.40812	10.3724	19.2317	3.02497	0.85585	0.526554	0.40815	1.26164	2.87544	3.00566	0.101339	3.30811	2.00259	17.005	8.79506	0.762229	15.5724	19.1742	0.084663	0	0.084061	29.3222	0	0.361674	0.062486	5.72023	7.74628	8.09078	1.85438	1.6581	1.02142
Aco003801	15.7806	3.18959	12.591	-9.40145	0.623646	4.83343e-05	salmon	32.0781	17.5316	35.1222	36.1386	21.0965	30.6221	44.064	23.2898	34.0861	60.0826	15.2894	37.6995	54.4089	14.2341	38.3819	40.6993	10.9184	46.0957	27.1307	13.3479	9.55755	18.1169	31.8559	28.4762	18.5308	32.4167	37.843	25.7641	22.9225	8.99432	0.216634	0.063193	0.458464	3.78754	5.45167	5.21751
Aco013494	40.3894	10.8167	29.5727	-18.756	0.802836	3.84836e-09	salmon	15.4688	17.602	14.631	16.75	16.7684	13.4772	20.3174	10.4701	9.06081	21.2125	13.2216	13.0499	20.9587	17.1596	12.373	15.2397	11.8615	14.9117	17.6143	15.6608	12.2876	21.1994	15.4365	12.9745	12.5406	12.955	20.2558	10.0002	10.8317	12.9104	9.15855	5.55562	7.39899	13.3075	13.5301	13.7065
Aco008998	14.4318	3.74279	10.689	-6.94626	0.650296	1.7626e-05	salmon	9.5556	7.02391	3.87959	36.481	13.9777	2.42482	25.1527	8.52098	0.771023	15.4452	7.33217	1.32128	15.6804	12.4495	0.290525	13.9987	8.67702	0.571871	16.9241	17.3798	0.30266	1.64393	9.82034	0.484234	8.35063	0	16.5028	1.35496	0	0.063356	0	0	0	0	0.314129	0.45492
Aco017079	21.0934	7.71072	13.3826	-5.6719	0.684429	4.16123e-06	salmon	10.1846	11.8537	11.3255	8.00215	8.58349	8.33082	10.4312	9.00563	7.50076	12.2838	8.07339	9.76307	11.6634	8.56034	7.97056	7.5867	7.16486	9.96307	11.825	8.41295	8.12949	12.0571	10.6251	11.9391	5.50934	11.0995	9.5227	7.00906	10.0867	7.73448	5.78322	5.35025	4.4766	9.11295	9.26017	8.37088
Aco011907	88.8721	22.4713	66.4008	-43.9295	0.849062	5.98778e-11	salmon	103.333	110.858	100.316	119.219	101.213	110.578	120.446	82.4961	52.6588	116.053	67.8935	47.239	127.089	75.9957	51.4344	141.995	61.2447	49.6518	129.898	64.4151	33.5657	83.8947	118.882	105.402	68.7841	59.1957	113.92	75.8019	44.2362	80.0035	20.5612	17.8494	23.1354	47.3497	57.7198	58.8325
Aco025807	38.4199	24.6274	13.7925	10.8349	0.707942	1.37002e-06	salmon	4.5156	0.674758	0.182555	8.44593	1.191	0.163994	17.0952	0.477545	0.031083	29.4999	2.74209	0.080577	14.1909	2.56791	0.093352	4.55592	0.610697	0	1.72207	0.83186	0.258953	1.16803	1.91466	0.383091	0.275282	0.078589	10.8323	0.445937	0.193679	0	0.793971	0.072656	0.096523	0	0.351578	0
Aco020942	28.7141	10.319	18.395	-8.07598	0.749109	1.47435e-07	salmon	2.61983	2.03616	0.746813	2.48517	0.983448	0.324669	1.67417	0.227793	0	1.52766	1.02493	0	1.48267	1.4035	0	1.33092	0.826305	0.124768	2.6273	0.111121	0	2.12419	1.10389	1.80229	0.07665	0	0.425231	0.490581	0	0.068306	0.362648	0.172608	0	0.379133	0	0.494636
Aco010202	67.6936	28.0859	39.6077	-11.5218	0.892285	2.73495e-13	salmon	25.7243	15.1324	5.34259	17.9612	13.0532	7.38615	16.2051	10.5524	5.3545	20.0553	7.04949	6.14733	18.328	7.89038	3.72402	17.592	6.71527	3.00873	14.5051	11.1553	8.90859	10.0477	16.6806	18.1149	4.19777	6.5353	15.774	7.07408	5.18674	3.20335	1.98552	3.14362	3.03131	3.68511	5.06887	4.19349
Aco031364	7.08694	3.38609	3.70085	-0.314767	0.593628	0.000135455	salmon	10.7874	3.44684	2.47797	5.50611	2.78028	1.70995	7.00162	2.05307	1.69471	5.19168	1.00432	0.955973	4.74417	3.07625	0	2.8529	2.29951	0	2.19343	2.45355	1.06256	0.548335	2.86429	1.97544	2.2014	0	2.62626	9.92348	4.8429	2.56576	0	0	0	0	0.462826	0
Aco010176	51.4764	26.3982	25.0782	1.32003	0.877416	2.18853e-12	salmon	36.4304	37.6701	34.0346	30.2157	31.6028	27.3684	30.9691	29.5569	23.9409	51.5744	21.6868	22.1694	35.5441	26.9241	21.4528	21.2028	17.6876	25.5454	27.1907	25.9369	19.1507	35.4294	35.7711	33.8529	18.5208	32.508	43.5536	19.4513	21.1652	17.5949	15.3213	17.7144	17.0858	21.5711	23.968	19.502
Aco005844	66.1196	28.8313	37.2883	-8.45704	0.841621	1.27742e-10	salmon	34.5858	27.9323	20.984	28.0762	23.0361	17.3344	26.5429	22.1755	17.4028	34.8839	16.3525	14.1364	24.8704	19.3809	14.9458	20.3116	20.7083	18.671	31.0858	30.4811	19.8595	27.464	33.0031	26.8921	13.7247	23.8983	32.5674	20.5251	14.1246	14.4848	16.1104	13.8334	16.0725	28.5692	25.0635	23.9125
Aco005971	24.7776	13.4874	11.2902	2.1972	0.630226	3.80081e-05	salmon	17.6482	7.10701	3.69163	19.6088	3.29912	2.34904	6.72284	0.518717	0	0.733193	0.168181	0	0.868327	0.271096	0	0.393913	0.122256	0	1.08881	0.154792	0.13369	2.40851	10.5238	0.211865	0	0.207777	15.2803	0	0.323104	0	0	0	0	0	0	0
Aco007435	24.3203	12.1861	12.1341	0.0520222	0.791404	9.12329e-09	salmon	5.577	2.44269	0	3.05863	1.68439	0.350841	2.74969	0	0	3.36996	0	0	2.71562	1.34973	0	0.958049	0	0	1.11782	0	0	0.771765	1.61302	0	0	0	2.50697	1.15857	0	1.26626	0	0	0	0	0	0
Aco000123	3.40395	1.66787	1.73609	-0.0682213	0.575964	0.000237159	salmon	6.11524	1.85502	0.630479	11.5098	1.49475	2.24135	6.13416	1.54344	0.889943	6.52835	1.8252	1.38545	2.53215	1.17676	4.79772	2.32494	0.585083	0.911738	1.19456	1.03978	0	0	1.34251	6.40791	6.322	0	7.60518	3.68255	0.645773	0.626369	0.17747	0	0	1.55832	5.501	2.64956
Aco005618	81.1848	26.0946	55.0902	-28.9955	0.868059	7.09083e-12	salmon	33.3262	25.4693	14.2491	33.077	18.1177	8.82767	28.2611	15.2553	6.01081	38.4759	11.8221	3.62292	26.1165	11.8675	3.02615	25.3345	7.5922	2.06832	30.7459	45.7398	0.487757	38.2634	34.0199	29.5392	6.99663	5.52852	35.5629	14.3459	7.34349	2.62358	0.197528	0.273391	0.121854	10.7973	13.9951	10.0429
Aco006266	11.176	3.48635	7.6897	-4.20335	0.698662	2.15077e-06	salmon	0.535809	1.38805	0.395326	0.371345	0.81373	0.745959	1.15384	0.352688	0.760721	1.63887	0.758717	0.929633	1.05121	0.969708	0.449504	0.823419	0.604769	0	0.989854	0.783842	0.4343	0.970876	0.952883	1.26069	0.363773	0.403816	1.89668	0.523352	0.382683	0	0	0.487558	0.367018	0.654911	0	0.496444
Aco001488	14.2838	1.46903	12.8147	-11.3457	0.608305	8.29162e-05	salmon	56.1507	50.9542	39.0954	62.9817	48.6836	51.6282	59.5869	50.9205	35.3784	61.7172	54.2556	55.9566	62.6127	54.1474	45.3654	49.3019	44.4864	49.6588	63.3001	39.2631	39.1101	37.8534	57.8069	53.3982	41.2244	46.2806	52.3151	59.5637	35.4909	70.7692	29.4814	22.7764	28.2497	42.1114	37.7217	40.5723
Aco029318	10.5138	2.22616	8.28768	-6.06152	0.557372	0.000413536	salmon	104.948	79.4319	38.1809	170.535	123.667	40.4911	213.208	158.135	141.562	297.71	158.323	141.435	216.261	151.563	175.073	148.322	132.882	182.076	132.356	130.488	64.7021	86.7606	126.758	157.35	166.475	219.329	228.531	52.5565	22.4692	24.5017	12.7165	5.89625	9.80937	26.1313	26.5132	14.3241
Aco017029	86.5285	41.0295	45.499	-4.46952	0.93329	1.09539e-16	salmon	45.1129	25.8813	15.171	45.6195	23.0842	11.2324	32.487	12.5647	4.75288	48.2729	10.5867	6.10125	23.6482	5.89178	4.35029	18.8937	2.52541	2.21661	11.796	2.62313	1.08101	21.2848	34.5996	30.1564	9.08984	4.98489	42.2409	9.40742	4.7332	1.98809	0.332206	0.280769	0.092349	6.98558	5.62792	4.22953
Aco009160	23.3763	9.3656	14.0107	-4.64509	0.751536	1.27587e-07	salmon	5.49742	6.49075	6.58633	6.18935	5.51646	5.03956	5.28704	3.5548	5.13563	8.94959	4.36106	3.01935	7.79997	3.78661	3.38187	4.7935	3.84317	3.30895	7.50164	7.11308	3.70542	6.59093	5.60974	5.84827	2.96939	4.50856	4.19629	3.40365	3.23573	3.29324	3.30988	1.98383	2.71516	6.01655	4.73764	4.40246
Aco024843	6.80615	4.99738	1.80877	3.18861	0.420816	0.0105975	salmon	0	0	0	0	0	0	0	0	0	42.3017	0	0	0	0	0	0	0	0	0	0	0	0	0	0	0	0	0	0	0	0	0	0	0	0	0	0
Aco003254	77.6126	18.0297	59.583	-41.5533	0.801459	4.28256e-09	salmon	27.2437	17.0965	8.07963	44.0988	29.8318	7.32212	78.812	26.6676	6.68138	86.682	16.8302	4.9419	77.0661	20.5674	2.30189	70.4049	21.7619	6.43164	19.9424	9.98334	5.56514	19.16	38.154	48.6362	12.9447	20.0022	48.1579	27.3074	14.3021	7.84893	0.292189	0.501362	0.602046	8.68342	10.87	6.88521
Aco027309	129.421	22.1821	107.239	-85.0566	0.829534	4.04083e-10	salmon	39.1413	38.4914	32.5144	34.316	30.7636	28.6515	37.164	27.1565	27.7867	40.4844	27.2649	28.8431	41.8555	33.7126	26.1663	39.4234	26.5327	28.2291	45.4226	24.8185	21.6312	48.6304	45.0294	36.5603	21.0884	35.3007	44.366	31.2567	25.9476	20.1035	27.1952	23.9221	27.4111	29.4148	30.5247	28.6212
Aco008869	106.43	14.5847	91.8452	-77.2604	0.735075	3.29935e-07	salmon	42.054	48.4803	37.1572	35.0271	37.8806	29.4434	45.4379	39.2998	28.6606	53.4482	32.3135	27.1938	57.945	37.5718	21.5696	50.206	35.6605	25.7655	68.0675	37.5558	26.9731	82.518	67.6189	67.6675	32.9259	41.5529	62.5914	46.558	45.839	37.0106	17.2917	16.2168	17.285	43.8056	46.8139	40.3261
Aco008028	9.74583	2.70343	7.0424	-4.33898	0.61759	6.00124e-05	salmon	264.88	119.154	260.23	267.923	157.477	307.281	221.89	154.536	228.274	411.283	97.4513	243.196	292.418	89.1755	265.676	246.858	87.7112	269.429	174.182	36.818	122.224	124.003	214.122	161.36	100.502	199.43	323.018	264.9	101.11	32.5349	34.6395	46.7434	57.6391	56.5218	50.9945	68.6176
Aco010402	96.4966	47.9504	48.5462	-0.59577	0.939658	2.09105e-17	salmon	27.1251	24.8789	18.7272	24.781	20.9064	15.3332	23.5019	16.0053	11.7503	33.5818	14.62	10.2408	28.9442	19.8267	12.0856	18.0172	12.8815	13.7675	25.2583	17.3386	11.0408	27.1105	26.9302	25.8867	12.2543	22.1851	26.1539	23.7979	12.6697	11.8836	12.7125	10.8996	12.3312	19.6214	16.3277	14.3746
Aco000302	132.932	50.9965	81.935	-30.9385	0.948115	1.71391e-18	salmon	50.653	42.9205	23.3946	49.0024	29.6487	17.7338	44.832	22.1151	12.1463	48.8337	19.3583	11.2354	30.356	21.0202	10.9895	33.4851	19.0115	11.3008	39.0001	21.5488	11.7129	42.5509	58.3249	33.8638	9.93018	19.4871	45.4597	22.8936	13.6357	11.2593	6.93706	7.29292	7.29304	21.3445	18.6655	16.6032
Aco014401	24.9821	7.20375	17.7784	-10.5746	0.709055	1.29634e-06	salmon	91.9248	84.3895	70.8341	86.9211	95.3656	72.9435	67.638	62.3552	36.6174	106.954	67.306	36.5941	103.066	83.0282	36.6973	93.5552	65.6938	41.5404	110.866	72.3475	62.2016	119.838	62.4113	124.892	66.9593	43.7723	67.5707	62.988	45.9306	47.9489	54.6211	46.6439	48.9946	60.7554	56.6977	54.9964
Aco001095	12.7896	5.70631	7.08333	-1.37703	0.620968	5.32181e-05	salmon	31.43	21.4916	12.29	40.3177	25.5826	13.6238	36.6249	29.2235	25.1456	57.8333	30.7383	27.7738	43.9763	24.2476	27.3301	19.0707	17.9201	16.4722	16.2243	12.1442	8.50101	15.4473	31.4909	20.0973	32.1517	10.9454	45.9123	29.3759	23.4098	30.1374	18.9956	10.0211	14.2789	11.9201	17.3633	11.3643
Aco022043	7.39911	2.13901	5.2601	-3.12109	0.646814	2.02196e-05	salmon	3.16016	2.8452	2.19848	4.53217	3.80059	0.949368	3.30061	3.45619	1.48396	3.72838	1.08306	0.370945	2.37067	1.78689	0.521345	2.63757	2.10078	1.0025	3.20044	0.795454	2.2449	1.19489	1.81144	2.59342	1.55451	1.26158	2.59872	2.69003	0.897784	0.432737	1.23001	0.986917	0.568948	3.051	3.07028	3.35185
Aco013213	90.4123	42.8235	47.5888	-4.76535	0.926832	5.01012e-16	salmon	65.5853	54.3913	41.5937	55.4158	47.2841	30.3142	48.0146	40.9329	26.9143	66.5095	32.4995	25.8375	49.5448	33.4116	21.8397	36.2996	34.2863	15.8072	54.1794	36.3713	19.4124	55.7622	50.2055	50.5217	17.6278	35.7888	45.6953	31.2056	22.4026	19.6593	16.9044	19.0258	21.4837	30.7634	37.338	28.9421
Aco001973	47.1525	16.3528	30.7996	-14.4468	0.785719	1.37429e-08	salmon	45.1892	49.1808	47.0552	35.6931	36.4642	42.8972	37.4539	25.3848	23.3365	49.9571	29.1236	29.8344	38.5289	33.3892	27.5078	30.9481	27.5484	32.0184	44.6043	23.6008	24.7511	50.5929	36.053	41.8502	18.7685	40.2449	39.2664	24.9444	23.8764	21.9786	19.9542	15.5592	22.2581	30.6872	26.534	28.2521
Aco007409	25.6761	12.3997	13.2764	-0.876731	0.782653	1.70543e-08	salmon	12.5429	17.221	10.4826	13.6003	16.6803	8.78394	18.0082	13.9715	7.5197	30.7123	10.7453	7.92427	18.4565	11.5089	7.66958	10.6907	5.70753	5.53237	12.782	6.83215	8.74381	12.4724	11.5792	16.3446	8.77529	6.20674	17.0675	16.0699	14.395	11.3371	8.62739	5.61826	7.25957	5.89489	10.3756	7.07597
Aco029833	29.6816	12.1285	17.5531	-5.42456	0.737753	2.84038e-07	salmon	5.37071	4.77288	2.9821	4.84281	4.56145	1.63706	3.79706	1.87319	0	3.32075	0.584004	0.225495	1.41877	0.627728	0	0.660196	0.205282	0	1.05364	0.134144	0	1.03065	5.1227	1.3148	0	0	7.17054	0.166103	0	0	1.97679	0.078003	0.861127	0	0	0.082568
Aco004553	23.8406	10.3292	13.5114	-3.18224	0.783469	1.61076e-08	salmon	336.592	243.22	193.652	324.813	227.267	163.011	342.174	194.909	166.914	296.826	109.047	148.048	207.145	124.874	152.418	151.254	170.134	113.657	168.604	315.842	155.918	112.024	270.703	203.679	164.307	153.54	365.523	252.643	124.241	128.195	54.7471	35.824	44.8928	203.179	191.325	164.386
Aco011199	52.4078	19.9357	32.4721	-12.5364	0.82687	5.14643e-10	salmon	446.701	325.545	228.797	436.429	303.975	221.968	371.86	185.197	77.9407	350.161	164.002	49.9938	262.504	190.96	53.0038	262.889	164.008	52.5183	326.619	150.905	64.7001	261.563	295.524	332.257	260.836	81.2778	351.605	275.057	232.898	313.817	71.6226	65.8836	58.2033	95.3584	147.627	103.358
Aco016021	32.9265	9.59989	23.3266	-13.7267	0.763405	6.13851e-08	salmon	6.16157	5.03527	2.98635	6.87767	3.32845	1.81383	4.55679	3.1076	1.66759	4.71404	1.61148	0.778842	3.46576	1.93888	1.83402	5.81794	1.42279	2.05713	6.59762	0	0	5.53139	2.71461	2.84581	1.62876	0.659726	4.94797	3.11981	2.56921	1.62118	0.800909	0.90982	2.21177	3.51011	2.33675	3.14065
Aco016163	36.1625	14.3169	21.8456	-7.52867	0.755162	1.02477e-07	salmon	76.3345	63.1575	58.4312	59.5287	44.5471	39.5629	61.7152	39.8657	43.7957	75.1704	42.4775	43.2406	55.4494	44.0619	38.2202	39.2899	34.1901	38.4519	53.3924	35.6663	35.0763	62.7012	76.345	63.8499	28.4054	58.9744	75.2201	47.2381	26.4762	24.1991	13.8578	13.2866	18.1261	86.1162	64.0649	69.1555
Aco018386	8.09271	3.38973	4.70298	-1.31325	0.483739	0.00279862	salmon	45.7405	14.0849	6.08184	19.0907	10.4727	4.04215	0	0	0.150827	0	0	0	0	0	0	0	0	0	0	0	0	0	0	0	0	0	48.9888	0	0	0	0	0	0	0	0.543646	0.098335
Aco000806	32.7844	15.8927	16.8917	-0.999027	0.760761	7.25137e-08	salmon	23.4571	20.8911	20.1836	20.8144	17.8687	13.3777	22.3098	16.1634	12.0787	38.3656	12.0259	9.90916	24.7241	14.2655	10.0405	13.8696	6.65441	11.4347	13.2846	11.3684	7.60629	43.7068	21.6784	30.3051	11.9206	39.0748	28.5109	15.1891	10.5431	7.24903	4.30428	4.34955	4.54613	16.5033	17.1666	15.2681
Aco010983	47.0068	25.6085	21.3983	4.21018	0.710874	1.18378e-06	salmon	0.89752	0	0	3.06059	0	0	7.91022	0	0	14.2111	0.036837	0	4.71676	0	0	3.36846	0	0	2.00843	0.068974	0	1.15327	0.86502	0	0	0	8.95837	0	0	0	0	0	0	0	0	0
Aco012278	40.3992	8.6059	31.7933	-23.1874	0.732106	3.8875e-07	salmon	75.036	70.3672	60.4034	71.5799	67.442	52.1828	64.7846	46.2578	34.0083	73.5279	54.3054	32.9402	77.8046	47.7219	36.616	73.8678	52.5928	44.7732	76.0958	45.601	50.503	93.713	70.456	68.4438	32.8155	48.9303	65.7978	71.399	50.2729	38.9572	55.2279	57.3101	62.3968	53.0066	48.9256	45.9827
Aco013028	81.4702	33.9858	47.4844	-13.4985	0.900931	7.06157e-14	salmon	73.1649	61.6852	49.7733	71.823	53.6265	48.0288	63.9083	43.1991	33.1652	73.9448	43.24	31.188	59.7672	50.5461	33.287	61.7357	48.2786	27.2379	57.4348	37.8679	40.7012	75.5149	63.8187	61.6204	34.861	43.173	61.6544	50.4021	36.8364	27.9996	41.1451	34.14	41.399	42.5728	41.1332	43.8141
Aco015163	9.08352	2.80463	6.27889	-3.47426	0.673188	6.83355e-06	salmon	35.4765	34.6915	29.4882	30.6754	29.3413	26.2363	38.3166	25.0028	22.4404	36.432	28.7837	22.4379	38.3998	22.4498	23.8949	34.3861	25.0649	22.2082	23.8475	17.8412	20.3159	26.8138	29.7824	35.3927	17.6717	34.7439	26.078	32.0808	19.7904	22.7029	22.3268	20.8264	27.285	32.191	34.0785	27.044
Aco007831	63.3435	19.9176	43.4259	-23.5082	0.844303	9.76538e-11	salmon	14.3301	10.1581	7.98031	12.5986	7.23615	6.45894	18.3597	6.47849	4.69048	32.5596	7.46823	5.06569	18.4472	6.21332	5.07665	11.2244	5.23229	4.9294	17.0207	5.06847	4.45943	16.188	19.2665	14.9759	3.70393	10.455	19.0858	11.7338	2.55901	1.83834	8.91007	8.42811	8.97461	9.56477	9.06929	10.3877
Aco008320	33.1503	15.9907	17.1596	-1.16884	0.75733	8.973e-08	salmon	40.2442	37.1112	37.6891	28.2813	24.2956	28.8733	34.6542	29.8591	25.4482	51.6545	27.0124	22.6821	37.8696	28.7086	22.1248	24.2949	24.7266	25.5293	30.7506	40.244	32.8667	37.3015	53.3447	50.7302	15.1531	45.1253	44.8725	22.3777	25.3014	15.426	12.318	16.1679	15.2803	29.8062	32.8535	26.9835
Aco003276	135.67	18.6736	116.997	-98.3231	0.829193	4.16885e-10	salmon	17.6131	16.0219	12.7607	16.886	14.0298	12.6884	18.972	12.8047	9.79083	23.0622	9.82044	7.33922	22.775	11.8352	7.19245	20.679	10.9506	8.29832	23.8529	13.9505	10.232	12.9773	21.019	14.4014	10.9337	8.29868	19.8743	16.1947	18.7223	13.3076	5.70542	5.36723	5.58401	8.73826	13.4948	9.71291
Aco004338	78.8685	15.0745	63.7939	-48.7194	0.746101	1.75986e-07	salmon	36.0345	33.8508	30.5539	31.8683	30.7365	29.5283	35.1411	27.7467	21.2047	43.8932	29.3933	21.6361	43.5515	33.7998	24.0605	32.8651	27.6117	31.4958	51.7441	36.5087	30.2428	43.2735	36.5154	37.1054	23.7126	33.5511	35.3015	28.3696	28.7077	21.9901	23.4173	21.0983	19.9905	36.5592	33.7958	33.3431
Aco011542	9.84913	5.07679	4.77234	0.304443	0.670326	7.72742e-06	salmon	38.3582	34.7719	23.3373	36.7502	37.2741	24.1267	35.7647	32.7482	28.8034	71.9868	34.0207	27.2851	45.0223	34.3919	26.9023	29.9217	33.2963	28.2285	44.992	34.6818	27.9501	42.4675	32.4433	39.7165	26.8886	37.3146	33.0615	43.1838	27.8162	28.8501	37.8602	24.3065	28.6738	27.2715	25.69	25.7653
Aco013005	28.7035	10.2759	18.4276	-8.1517	0.792785	8.24354e-09	salmon	23.027	14.9248	4.58692	28.4638	10.8618	5.23761	14.7465	5.3594	2.73813	29.9163	7.18893	1.05573	21.0827	4.34376	1.18002	17.1901	2.17114	1.49549	11.8977	3.21489	2.77112	6.10438	5.12714	34.1825	2.83942	4.4457	20.7354	13.3619	6.76003	2.13012	1.13022	2.01802	2.55336	11.7531	15.1782	11.0519
Aco003146	9.26607	3.42599	5.84008	-2.4141	0.701504	1.87666e-06	salmon	52.8182	39.3844	32.2944	56.0599	30.3366	33.6887	42.9004	28.7858	28.4151	48.8264	36.9236	27.9589	45.6906	32.57	30.5611	37.5799	33.2386	46.4391	43.9808	24.4086	33.969	34.4123	37.1866	30.3113	17.1077	39.9587	37.8619	27.3307	20.3839	17.1844	32.0581	19.1623	16.9359	30.4245	24.234	35.1988
Aco014283	62.0857	27.3934	34.6923	-7.2989	0.878521	1.89298e-12	salmon	344.51	238.958	224.812	333.871	222.578	216.342	265.541	231.841	149.924	329.377	90.6362	92.3836	226.079	97.8054	91.127	102.697	62.3754	65.1355	203.887	102.778	31.9629	168.947	234.294	186.62	170.117	103.706	308.691	234.362	117.825	82.0105	9.83252	10.8528	9.40476	68.7711	94.7772	67.0312
Aco002189	22.7432	10.844	11.8992	-1.05516	0.748579	1.52135e-07	salmon	25.7457	27.6216	30.866	25.2501	19.9846	23.5394	23.4544	22.2643	22.3927	32.6706	17.3259	21.3436	23.6612	20.7212	21.1701	15.2892	15.9435	22.1336	27.2262	17.8944	20.0016	27.9309	28.677	24.0186	18.2848	26.8132	27.4226	18.7053	17.5362	16.8368	12.7853	15.928	15.8276	20.3447	22.2866	19.2658
Aco008676	56.4229	18.4813	37.9416	-19.4603	0.832618	3.03835e-10	salmon	7.20497	10.1734	7.52167	7.0122	6.99287	5.38468	6.18319	7.39779	3.73821	11.4639	7.22758	4.45659	7.46247	6.12008	3.45653	6.29709	4.28858	4.05123	7.60082	2.76151	2.793	5.88912	9.18149	11.1352	2.68806	6.16732	8.09124	7.21748	4.52429	3.92593	2.08096	2.33394	2.53536	3.51988	3.7632	3.5746
Aco012337	26.8655	10.6526	16.2129	-5.56036	0.79834	5.4393e-09	salmon	51.6374	52.7829	37.7149	42.9907	44.5001	35.9058	43.6936	43.6456	32.3247	75.7328	38.4774	34.6058	55.335	41.0238	33.2198	37.4594	41.8321	26.4038	45.1456	36.6084	30.1062	40.3075	41.0713	41.9502	27.7819	39.7376	40.0673	58.6221	35.3692	24.1259	16.2297	23.5618	26.1258	32.0814	28.1284	32.2368
Aco001315	74.4483	18.1738	56.2744	-38.1006	0.823832	6.74736e-10	salmon	42.4983	40.6273	29.1853	40.9972	45.5374	31.3869	42.9916	32.9975	26.2543	63.7929	35.0024	26.4981	45.8745	30.724	21.2395	33.607	18.5234	13.8569	30.48	9.20742	6.50542	32.749	40.6606	45.241	28.3947	23.3104	42.3556	34.9124	33.7751	31.8049	2.28877	1.96141	2.05236	11.2127	15.1774	10.1954
Aco026244	8.86294	3.72336	5.13958	-1.41622	0.679211	5.2527e-06	salmon	0.148673	0.564023	0.693035	1.06576	1.04692	0.491166	0.720885	0.312524	0.179924	2.13643	0.625629	0.335764	1.55927	0.335973	0.114793	0.27043	0.809304	0.204193	1.08658	0.487329	0	0	0.436506	1.44675	0	0.306837	1.50936	0.280905	0.387254	0.611789	0	0.260662	0.06544	0.617331	0.122893	0.354958
Aco010374	19.1846	4.38813	14.7964	-10.4083	0.675048	6.30431e-06	salmon	49.8612	45.7083	26.0658	43.0116	41.0887	24.7753	64.5526	32.5969	13.5269	69.3792	59.8928	16.399	57.6435	42.665	10.5538	48.6198	31.4942	12.4393	41.5915	14.8746	12.4335	6.64463	72.7195	41.5329	17.187	9.58722	47.3158	67.5459	51.4052	40.2039	7.42755	8.55077	5.32328	30.1684	37.6126	41.9703
Aco028922	38.3255	11.8941	26.4314	-14.5373	0.646115	2.07806e-05	salmon	19.5342	22.4575	21.6657	14.9046	17.0404	17.8655	18.8205	17.668	18.9075	23.3478	14.5366	16.5019	22.2821	15.2057	15.9448	14.2372	12.7306	17.8289	19.7313	18.5885	13.9343	31.6148	29.358	24.2898	13.2079	24.5859	28.0149	17.9007	14.4656	12.0792	12.1564	12.5556	12.3273	22.3184	22.438	19.907
Aco001019	24.3831	9.38823	14.9949	-5.60665	0.741187	2.33778e-07	salmon	90.5744	73.2574	29.5844	100.891	70.9622	26.7021	69.3634	10.723	7.36678	102.486	11.8921	3.41427	91.726	7.5537	1.17668	62.3468	2.9989	1.58145	87.7526	0.476181	1.42817	12.2749	18.663	34.6559	44.3969	2.63938	22.155	36.6581	17.3886	43.4966	2.79742	2.01423	3.90937	10.2602	19.9732	18.3137
Aco014690	17.8522	5.22145	12.6308	-7.40931	0.711256	1.16131e-06	salmon	126.731	112.692	94.5478	106.745	93.5227	70.469	130.285	75.3936	36.907	182.65	94.3138	51.9503	115.706	83.4085	40.0783	89.5116	55.5146	44.0106	84.9292	44.5564	34.301	81.432	131.638	123.114	39.897	88.0356	134.554	138.433	111.674	66.6886	87.5832	97.3172	111.241	40.5416	50.8884	39.953
Aco004224	66.9258	34.2014	32.7244	1.47707	0.923172	1.11637e-15	salmon	335.392	249.18	275.684	318.282	170.603	136.149	234.563	126.224	97.6274	427.695	98.997	82.3222	166.9	89.4467	70.0431	138.854	81.4277	73.3554	198.877	74.045	58.367	145.194	316.976	222.654	81.9012	152.955	349.9	180.886	70.2147	73.5662	36.3639	30.3535	41.0664	157.804	141.14	112.933
Aco017740	61.4724	15.762	45.7104	-29.9483	0.821865	8.01862e-10	salmon	86.5058	71.9928	62.873	87.1977	60.6944	61.629	70.6642	50.5547	58.0708	76.3099	39.1769	50.8137	63.031	43.1016	53.4216	77.9558	40.2231	47.5424	92.2361	49.5646	65.5522	65.3322	88.9375	61.6737	46.1852	52.3637	76.4234	56.3703	47.4015	49.4475	23.1174	18.5606	23.2306	51.6926	55.5515	51.4453
Aco025339	39.9781	26.3001	13.6781	12.622	0.703387	1.71308e-06	salmon	12.5063	5.05796	0.334962	22.187	4.08314	0.368104	59.6088	2.03071	1.07558	114.555	2.68134	0.631156	36.4305	2.66044	0.468319	24.8955	0.741806	0	8.49981	0	0.163436	5.73439	3.48147	0.224131	0	0	51.9242	0.638416	0.40425	0.351315	0	0	0.583972	0	0	0.633933
Aco001390	16.5864	4.35052	12.2359	-7.8854	0.640196	2.61254e-05	salmon	24.1858	24.7295	35.0887	29.9713	34.8285	49.4488	55.8065	29.484	25.2467	61.6326	24.8658	41.4569	41.2961	17.5496	28.1824	36.4984	18.8829	13.4817	31.2748	25.6958	7.7601	12.7188	32.9002	18.5173	35.7853	10.1299	52.1141	22.7877	13.1233	21.4769	5.07795	4.2692	1.81174	14.047	12.974	13.7872
Aco001466	28.8405	11.4813	17.3592	-5.87789	0.73148	4.02299e-07	salmon	214.075	161.65	148.46	226.539	134.95	103.734	179.635	117.541	89.8055	166.465	77.6331	76.3566	131.726	84.8382	73.4245	95.3047	117.104	94.3313	143.266	156.949	96.5401	218.608	218.905	146.091	131.816	178.675	227.507	167.862	116.883	96.1786	53.3031	55.7528	61.8488	217.86	179.019	163.585
Aco022172	17.5296	14.0705	3.45909	10.6114	0.586147	0.000172399	salmon	0.052826	0	0	0	0	0	0.668753	0	0	2.81308	0	0	0.296728	0	0	0.356538	0	0	0.100171	0	0	0	0	0	0	0	1.23994	0	0	0	0	0	0	0	0	0
Aco020469	42.0118	9.84415	32.1676	-22.3235	0.698388	2.17902e-06	salmon	48.4679	53.0136	53.4261	39.7011	38.3445	43.3093	55.451	37.2897	36.5549	69.9548	28.1017	38.3153	61.2523	42.4303	38.6252	23.0972	24.329	52.0119	54.7556	30.3438	24.3072	79.9641	84.4746	58.8441	30.5444	63.757	84.3061	49.6786	51.8119	37.7359	22.9093	31.6619	29.8812	47.104	44.1515	37.577
Aco013497	73.0832	34.3531	38.7301	-4.37707	0.862416	1.38097e-11	salmon	79.1667	81.979	70.8742	65.9413	56.97	51.3479	64.1218	46.7577	38.988	86.7805	40.7424	38.0374	61.7347	48.2775	35.6686	32.564	38.5185	38.1796	52.6278	34.0295	23.8959	94.922	78.0705	82.9953	24.5208	71.0134	82.9915	43.5691	28.4078	27.3624	22.731	21.2251	22.1374	47.2667	39.4652	36.6069
Aco007614	49.1394	19.2769	29.8625	-10.5856	0.740083	2.48958e-07	salmon	69.6819	77.1653	69.958	56.7189	56.1291	56.0271	49.6962	52.8717	44.7077	78.7518	44.3042	40.571	65.2402	54.6156	40.7905	40.6539	47.1681	49.9419	62.1629	61.4371	46.5543	73.2137	61.2962	77.4559	38.0313	74.3341	67.928	62.6782	46.1069	41.614	39.3309	36.9999	39.1913	64.005	58.2684	54.2756
Aco005611	44.1006	20.3445	23.7561	-3.41164	0.807553	2.65131e-09	salmon	100.528	92.2065	68.5324	77.7131	62.972	58.6286	79.232	54.4154	44.0092	110.744	56.6281	47.5707	75.8214	50.6635	39.1039	47.289	39.09	38.4268	40.5751	54.911	35.9306	86.5659	91.9589	112.714	40.1995	85.9727	101.95	74.7064	56.8262	45.3025	22.9496	28.5599	24.9958	90.0555	77.2676	75.937
Aco002668	92.8629	34.1392	58.7237	-24.5846	0.877817	2.07669e-12	salmon	86.6824	71.6794	65.4393	76.5445	59.4153	49.818	74.2479	52.3647	40.1836	76.9472	51.6719	47.4817	61.1855	47.3019	40.345	60.5996	48.299	37.9839	71.6136	52.441	48.0813	105.819	76.8475	67.7837	36.9059	53.3426	75.7719	55.1555	51.6161	42.573	32.2562	32.7279	32.598	50.6315	57.7651	43.8263
Aco004634	36.6119	14.3529	22.2589	-7.906	0.767804	4.63056e-08	salmon	47.7661	42.9402	41.5033	45.2327	35.8327	31.836	46.9872	31.2601	39.9961	48.0245	30.9868	44.9775	43.7746	31.6642	37.7153	33.0572	26.5966	33.4848	39.7069	32.4741	25.5594	53.9494	53.9306	48.6664	28.0748	43.1269	58.3916	39.8404	23.9352	21.4424	25.185	22.9287	27.4414	44.3633	40.756	42.8007
Aco011373	65.9392	33.1736	32.7655	0.408073	0.901039	6.93805e-14	salmon	47.9254	40.6906	34.484	41.7734	34.7823	27.2396	44.2476	35.2842	23.4708	73.1007	35.4187	26.0233	48.6849	29.0834	27.2536	36.3138	27.689	28.1836	45.2034	32.5534	20.7807	49.8557	47.0482	54.7165	24.8257	39.5594	47.6017	46.4084	31.1079	24.4304	26.0237	24.7192	28.1212	29.5249	34.1356	27.9424
Aco026046	17.0782	8.34565	8.73252	-0.386872	0.738484	2.72576e-07	salmon	89.388	32.218	39.9812	99.0468	33.3812	43.087	56.8913	35.3294	32.1044	70.5201	15.1424	24.5405	60.6945	14.8649	17.9351	49.6764	14.9363	20.0475	49.3894	20.8251	14.4187	19.9566	46.6459	47.6367	29.9534	31.449	58.0713	98.1374	37.9783	25.9977	5.45766	7.73271	6.59023	28.8872	37.9429	42.4159
Aco000952	48.4652	17.122	31.3432	-14.2212	0.764432	5.75044e-08	salmon	56.4159	52.2855	45.8764	41.0303	37.1775	41.3242	50.6333	38.6836	35.6491	60.7415	35.5213	35.0045	56.5261	41.1979	32.381	39.6906	32.9131	35.6944	50.6657	44.5711	31.7872	65.1566	59.7147	58.9807	35.2715	55.0825	66.8792	56.6536	52.7616	42.9759	35.9063	34.9256	34.3421	50.7507	46.4997	44.6863
Aco002428	91.8354	22.8788	68.9567	-46.0779	0.869998	5.59908e-12	salmon	33.4028	28.6845	23.2672	35.717	30.9924	21.5486	34.4183	25.6049	16.6919	45.5003	21.6812	18.2236	35.8904	25.279	17.3684	33.8071	23.6419	21.9995	35.3348	27.3494	21.67	37.8516	37.2154	32.6873	22.3355	25.1397	39.5429	24.9712	20.0022	18.4407	29.8874	21.0973	25.0365	21.6252	24.1061	19.6124
Aco005851	35.044	5.48512	29.5589	-24.0738	0.732422	3.82058e-07	salmon	59.6889	54.7499	51.8859	56.9224	47.0225	44.2935	59.8838	43.3737	65.6146	70.9462	40.3159	53.133	46.0455	28.938	59.4202	52.653	34.8433	30.4597	52.0351	34.3716	43.2378	53.4782	64.5208	51.2308	41.2709	40.7954	79.0759	49.4839	44.6972	40.2125	12.9508	14.6973	12.603	43.0736	48.1501	39.0649
Aco010218	74.1326	24.4701	49.6625	-25.1925	0.845673	8.49674e-11	salmon	58.946	47.6691	33.5232	46.7013	30.0662	31.5395	47.4087	30.0188	29.1006	53.4402	23.3862	24.4727	42.2239	29.2813	27.9305	45.712	31.9893	30.1037	53.449	42.4819	42.2897	48.1957	52.3433	38.3747	16.3446	40.4143	47.6933	36.4616	23.6457	17.7811	23.8438	21.667	20.4537	33.9792	36.6656	34.8699
Aco018024	40.6986	11.5511	29.1474	-17.5963	0.755536	1.00162e-07	salmon	70.3431	73.2426	53.7805	59.3855	53.5424	51.8967	64.6089	50.5731	27.019	92.8384	69.2143	39.0588	72.5411	68.4378	31.9276	80.712	58.4348	31.1398	60.1661	32.9352	32.4835	107.912	63.1358	96.9964	41.0266	54.4373	56.7768	50.3345	34.8969	31.202	32.718	20.4272	22.5694	24.4428	26.71	23.6219
Aco001615	12.1094	6.20327	5.9061	0.29717	0.705442	1.54959e-06	salmon	4.25167	0.58145	0	3.39575	0.701927	0	0.621814	0	0	2.43382	0	0	0	0	0	0	0	0	2.99269	0.521765	0	0	1.62161	0.783791	0	0.272671	2.28657	0	0	0	0	0	0	0.336051	0	0
Aco020930	18.5645	7.33468	11.2298	-3.89511	0.737795	2.83369e-07	salmon	2.08821	0.59902	0.439136	1.18246	0.698398	0.546248	0.745934	0.135803	0	1.05368	0	0	1.2077	0.257307	0	0.996218	0	0.268323	0.862158	0.412324	0.651362	0.366494	0.801428	0.346343	0	0.147169	0.326912	0	0	0	0	0	0	0.248126	0.12441	0.402831
Aco014558	43.4332	25.786	17.6472	8.13876	0.713551	1.03435e-06	salmon	4.80708	1.80111	0	12.0741	1.75665	0	27.0209	0.295502	0	52.6945	3.1116	0	15.0658	1.41108	0	15.6307	0	0	7.12653	0	0	1.99659	2.0726	2.6751	0	0	23.7096	1.0095	0	0	0.476064	0	0	0	0	0
Aco022047	9.92246	4.04506	5.87739	-1.83233	0.654737	1.47577e-05	salmon	13.5422	10.3342	10.6367	13.4442	13.8299	7.04813	12.5326	9.27391	4.58637	13.613	7.91539	7.57741	12.6273	9.12265	3.98345	8.0047	6.54556	5.98792	8.39694	0	10.9195	18.0751	17.2571	14.0379	0	14.7451	14.8352	11.9922	4.29799	3.42613	5.15767	8.76455	5.34183	17.8304	11.485	7.54663
Aco025303	21.3069	4.3239	16.983	-12.6591	0.675548	6.16869e-06	salmon	52.8369	84.9125	61.4765	63.2908	91.4941	59.8644	66.8518	56.2784	27.7554	117.002	89.1178	37.1286	75.4523	57.429	30.6275	27.3886	30.1397	26.9274	43.2771	15.3152	13.075	74.9153	68.2426	68.6734	41.5703	43.7094	92.4124	60.7549	51.6653	36.8856	54.5988	33.8698	37.0932	11.5786	12.2519	12.5552
Aco020267	109.031	38.7729	70.2578	-31.4849	0.888972	4.45818e-13	salmon	69.8463	63.627	50.4208	59.6113	47.6069	38.9087	60.5936	44.7269	39.1811	80.829	42.6048	33.784	60.504	46.859	33.9301	47.953	43.6462	43.0327	69.5482	58.2139	46.6216	71.4519	75.6599	58.0002	36.6315	49.5372	77.5399	53.9688	49.879	41.3861	38.3176	27.9151	30.4054	54.9188	54.9898	56.9129
Aco001465	64.6886	25.4709	39.2177	-13.7468	0.860451	1.72993e-11	salmon	110.93	102.586	74.8369	97.1138	91.19	64.349	99.8717	72.5433	49.3677	103.379	71.9487	44.1214	95.3036	76.9387	41.7881	83.4025	81.4546	54.2713	100.592	76.1218	61.6111	93.6031	102.658	86.6513	53.2089	72.5167	96.0599	69.3662	54.5158	52.4111	72.167	56.0317	64.2432	77.8148	81.4029	78.7103
Aco005624	31.9458	11.6544	20.2914	-8.63698	0.717984	8.24417e-07	salmon	112.61	51.1686	42.989	156.76	106.087	81.3853	161.264	50.9529	33.7997	176.556	51.4626	50.6149	136.441	61.5699	47.3632	142.825	44.291	42.0201	48.9798	8.84294	7.54777	33.8275	65.1158	41.9686	60.5455	26.1393	65.9371	40.4317	38.952	59.8699	4.60692	5.24029	3.92867	10.6195	26.0596	18.4223
Aco014389	10.0193	2.5373	7.48196	-4.94465	0.54591	0.000573403	salmon	119.005	93.7433	77.0897	97.0497	86.3434	65.2023	88.2497	71.8274	75.5363	100.74	58.5628	69.8849	86.2299	66.3902	73.5067	69.3324	68.2747	71.7326	92.928	107.771	76.6165	69.5614	80.6514	90.1684	67.249	99.0994	95.6877	114.845	84.5408	74.2668	57.7545	49.9112	52.469	104.145	98.9886	113.792
Aco006020	50.7022	24.5533	26.1488	-1.59549	0.8519	4.437e-11	salmon	11.1235	9.76258	10.2061	9.57777	8.05631	7.71898	10.3257	7.25184	5.51148	9.92279	5.09212	6.81749	9.39513	6.96814	7.02539	5.37881	6.30608	5.08636	8.47341	8.42759	4.44904	11.0977	10.3481	8.59504	5.76692	7.86632	11.7817	8.53782	4.8382	5.15224	5.26042	3.36548	3.03293	8.46985	8.49515	6.27761
Aco009544	58.0411	16.2051	41.836	-25.6309	0.789504	1.04765e-08	salmon	32.5222	26.85	21.9348	27.2332	22.5383	16.9983	27.0441	20.6523	19.4877	33.6826	19.7997	19.1553	26.5442	22.7868	17.9698	23.4029	19.1548	17.4078	26.196	33.1046	22.9325	26.4172	21.924	29.5834	18.411	27.2161	26.7039	27.8717	18.214	18.5696	10.0461	9.56169	8.30983	24.6787	22.1042	20.9473
Aco024738	47.2371	23.5358	23.7013	-0.165501	0.822779	7.40215e-10	salmon	24.092	20.2821	14.7706	20.6016	15.0725	11.8648	18.4209	14.8999	11.5309	23.3918	10.7159	9.91938	17.3826	13.6472	9.40476	10.0812	11.9753	13.9027	20.5226	18.2435	10.8641	21.1477	21.6027	17.2931	9.00969	16.4055	22.2944	14.5146	9.72779	9.74318	12.2357	11.4658	12.4413	19.6021	17.5755	16.169
Aco005393	105.046	34.2777	70.7686	-36.4909	0.907507	2.31391e-14	salmon	23.4647	23.3218	16.7525	25.8913	22.4672	16.0014	24.4229	14.742	8.17115	27.3728	10.6839	4.75741	23.833	12.641	5.03929	24.1476	12.605	6.79269	29.0973	19.08	8.03759	18.1362	23.3621	19.4245	7.41435	11.436	26.9437	10.9996	10.2253	5.12268	5.3717	5.19508	4.84838	14.2144	19.4477	13.3335
Aco007225	36.3449	10.7323	25.6125	-14.8802	0.669302	8.07225e-06	salmon	143.055	125.714	92.8681	123.08	87.8672	66.5878	116.186	75.3554	79.6501	131.836	69.5442	79.1117	95.3681	71.944	87.6557	92.5787	78.0895	86.261	108.909	164.697	100.915	130.495	111.371	118.223	44.6694	131.772	125.333	89.7588	40.1375	35.2929	50.2271	44.8573	48.3924	133.501	108.026	107.283
Aco016255	46.3268	9.38802	36.9388	-27.5507	0.747721	1.60032e-07	salmon	12.4674	13.833	8.26716	12.0842	15.5456	10.4797	20.8419	14.3333	11.4376	24.6603	16.0045	12.3449	24.9264	11.6451	8.19943	20.7092	11.6211	6.86729	16.1335	9.68779	3.95207	14.1984	19.7205	21.047	10.5483	8.79737	13.266	16.4673	10.851	13.0489	2.40825	2.00605	2.30623	11.4817	14.7784	7.23102
Aco027877	4.84512	3.07944	1.76568	1.31376	0.451354	0.00572628	salmon	0	0.065911	0.125607	0	0	0	0.234402	0	0	1.12438	0.268303	0.027155	0.098107	0	0	0	0.03053	0.015373	0.064883	0	0.037363	0.246889	0	0.06175	0	0	0	0	0	0	0	0	0	0.033374	0.21565	0.249644
Aco020415	16.1446	5.63794	10.5067	-4.86876	0.569738	0.00028675	salmon	12.2148	6.60686	6.61282	11.954	4.99007	5.94063	2.87335	4.65465	2.338	0.253266	0.044652	0.136975	0.932337	0.712692	3.0798	0.265481	0.647326	0.8854	0.338627	0.500893	0.250082	9.3578	9.51699	0	0	0	11.5519	0	0	0	0	0.323988	0.206511	0	0	0.044435
Aco015025	125.76	11.8156	113.944	-102.128	0.766246	5.12024e-08	salmon	13.7712	9.75255	8.25892	10.7807	6.74254	6.95631	17.2065	10.815	6.99169	14.131	5.77594	6.48951	8.37679	6.16913	6.75502	13.0541	7.8569	6.51868	15.7652	12.5094	7.82784	18.8675	13.6947	8.50871	5.52187	7.79361	16.1794	13.0513	6.22218	4.83911	4.9822	4.23794	6.42704	10.4168	8.86255	8.74109
Aco017453	20.1448	4.23342	15.9114	-11.678	0.671471	7.35768e-06	salmon	10.3369	17.7853	13.6523	10.7234	15.8751	16.6888	20.3991	15.3222	10.5015	18.3746	10.5246	11.8929	20.2063	13.7564	12.3251	12.653	11.8705	13.7865	14.3691	6.47538	6.15415	11.0802	15.7779	10.6563	11.4237	9.6617	18.7655	10.4774	9.00548	9.97915	5.52053	5.6084	4.75137	7.62423	10.2486	7.12655
Aco016577	77.5422	21.1852	56.3571	-35.1719	0.817967	1.12202e-09	salmon	179.921	146.622	132.095	155.212	116.812	108.06	158.447	106.595	84.8775	179.248	86.4931	82.0338	132.042	90.1663	77.852	110.912	77.3625	78.1427	207.936	102.72	91.367	200.52	162.845	138.001	80.1554	126.383	168.686	156.941	128.842	99.2042	87.5495	100.152	95.2287	134.868	132.723	125.003
Aco008955	22.5947	4.59546	17.9993	-13.4038	0.675792	6.10318e-06	salmon	61.3156	64.1221	29.3718	47.3968	38.8077	23.8973	34.6319	29.963	20.32	44.231	37.4884	11.4712	43.665	48.6522	15.5161	42.2245	32.9103	21.658	43.503	22.3614	18.6895	58.5312	18.9405	40.1909	17.1928	22.1745	27.4943	25.3186	26.2403	17.7012	13.7803	20.115	18.7778	17.6462	26.0192	23.6219
Aco018413	15.1543	9.27963	5.87466	3.40497	0.667991	8.53429e-06	salmon	1.53227	1.32119	0.815919	1.72712	1.90562	1.84179	2.39007	0.949609	0.658072	6.15554	2.62796	0.911714	3.70648	1.1822	0.175169	0.42881	0	0	0	0	0	0	0.297346	0.343368	0.191772	0	3.66332	0.781492	0.946977	0	0	0	0	0	0	0
Aco001481	36.4464	11.5303	24.9161	-13.3858	0.734227	3.45841e-07	salmon	142.452	140.392	108.83	127.993	111.875	92.4613	108.848	86.7553	84.6509	150.554	108.156	103.722	151.334	110.295	97.612	97.7934	63.9862	119.005	118.124	54.1684	80.145	167.407	137.545	148.623	64.3146	164.746	117.83	98.8604	72.8469	47.3293	32.6765	36.9182	28.8665	122.789	105.648	111.513
Aco000370	51.6024	9.90772	41.6947	-31.7869	0.706715	1.45557e-06	salmon	4.73701	3.41371	2.99945	4.36322	2.50309	1.90959	3.11251	1.60959	0	2.26409	0	0	1.57818	0	0	1.47732	0.304587	0	1.9745	0.499251	0.125815	0.540983	7.99439	1.08954	0	0	9.34753	0	0	0	0.39576	0.539689	0.311989	0	0	0
Aco005071	21.495	6.95985	14.5351	-7.57528	0.751008	1.31679e-07	salmon	75.6521	77.0404	86.3041	64.9925	64.7126	83.3163	57.0671	36.4486	43.8298	92.1745	36.3557	40.4828	61.9	35.4953	38.0248	76.8589	28.5981	42.6083	72.4662	43.7129	50.0926	67.9849	82.4361	60.6238	45.1609	48.1552	77.1409	45.0072	34.6162	42.1647	41.106	42.7244	53.9854	39.4292	46.088	36.7875
Aco016029	16.0956	6.42754	9.66803	-3.24049	0.553406	0.000463664	salmon	55.8011	41.6072	17.7426	59.8402	34.7068	13.7135	12.5586	27.592	1.9788	2.15027	1.21744	0	0.765854	1.17926	0.574174	0.499226	2.31128	1.62905	9.18836	0.76891	0.16957	29.7762	20.3008	0	0	0	93.9641	0	0	0.050065	5.08381	8.83652	6.60375	0.11029	0.310851	0.045783
Aco006104	86.3496	17.8866	68.463	-50.5764	0.827087	5.04685e-10	salmon	11.5039	6.40574	8.33453	12.3819	6.15142	5.86997	8.68027	3.06591	2.41947	12.4051	2.23151	0.926249	7.2769	0.536731	1.23948	3.39991	1.21331	0.481511	10.3497	1.69006	0.655879	17.4079	14.8057	1.45236	3.96301	0.85637	12.444	4.3222	1.99449	2.2027	0	0.550302	0	0.697764	0.345992	0
Aco015359	20.286	6.50719	13.7788	-7.27162	0.710727	1.19252e-06	salmon	38.7522	45.6884	20.3207	37.0768	28.8419	17.2694	37.9707	13.032	7.16972	28.4377	20.3202	9.98155	35.3125	21.488	8.94498	39.3016	18.0493	11.3515	29.3552	12.844	15.264	29.5935	25.3598	22.2449	5.39911	21.4892	21.8277	16.1649	5.56332	8.97758	30.5322	8.95781	14.5014	19.9199	14.5116	20.0552
Aco015203	19.459	8.88314	10.5759	-1.69276	0.725914	5.43592e-07	salmon	49.1706	49.7866	38.9063	40.0209	42.8915	36.9263	43.2236	39.5463	26.3766	63.0548	34.5539	27.6594	48.0778	39.5126	26.9811	37.4538	32.4502	34.2052	43.6737	47.1159	32.7914	51.8656	44.4649	43.4709	25.0854	43.591	41.692	48.7989	31.8962	33.1456	41.5182	34.2375	36.4396	44.2278	46.7439	39.4455
Aco002350	16.3176	7.01852	9.2991	-2.28057	0.73441	3.42337e-07	salmon	9.40278	12.9776	12.7444	10.8568	12.5678	6.74026	9.35745	8.89274	6.76202	14.3455	6.6666	4.51064	11.7177	6.84425	5.78015	11.711	6.32568	5.64956	9.52906	9.06563	6.6342	9.29066	14.6446	13.2616	0	10.0846	12.8382	7.50026	4.28794	4.21483	5.8369	6.89507	7.93218	12.8709	9.59053	7.41823
Aco011168	33.2732	11.4474	21.8259	-10.3785	0.774708	2.93754e-08	salmon	72.2194	55.3574	63.402	46.8154	47.3724	59.2201	68.8271	58.4773	24.7545	76.1437	35.2215	5.51814	69.589	48.3087	10.3577	49.6378	22.6935	13.2108	29.4799	8.80428	5.22877	8.65904	72.7929	27.0152	1.11275	5.95203	72.3098	0.979676	0	0.415662	0.314512	0.40856	0	1.39723	5.77781	4.60328
Aco002161	54.3868	25.2828	29.1041	-3.82129	0.813067	1.6927e-09	salmon	55.8104	50.2133	39.1591	44.2348	37.885	30.5287	41.3276	29.3849	24.2781	55.4553	30.5422	25.5786	39.1163	28.0724	24.9767	33.8119	22.3391	24.0435	39.288	33.3391	27.1526	57.4058	39.9958	47.4941	25.4561	46.4988	41.1346	40.8219	29.2083	22.8395	20.4501	17.0847	17.8889	50.3846	42.8952	37.2069
Aco006547	85.9497	38.3822	47.5675	-9.18527	0.918635	2.85764e-15	salmon	74.7396	47.8847	31.2152	73.6119	43.4879	26.2828	57.5109	30.791	12.9974	74.0317	37.1656	16.5767	51.0603	25.3771	13.5367	39.2336	20.9788	13.5732	43.6045	23.7559	11.8463	30.943	46.503	57.0704	26.7895	18.7198	54.4092	35.3853	21.3306	24.5931	19.0157	8.56389	13.4701	18.2142	16.6965	17.6997
Aco009615	41.2961	26.3398	14.9563	11.3835	0.77133	3.67731e-08	salmon	109.556	38.3666	3.899	109.328	20.7573	4.33169	196.522	15.9219	0.643768	409.937	11.8811	0.645778	154.388	17.2399	0.768512	63.4275	5.06783	1.02696	24.4024	1.54947	0.486141	10.1467	69.1488	33.7762	0.538611	0.62973	141.149	0.806739	0.134816	0	0.311708	0.109745	0.614726	1.10528	2.16617	0.086963
Aco009129	47.7852	18.1018	29.6834	-11.5816	0.788037	1.16463e-08	salmon	26.1033	25.2663	21.1743	17.8635	17.8809	16.8205	19.8344	16.9735	13.256	35.258	20.3929	15.9323	25.6226	19.3181	14.2718	17.0197	10.9317	14.2937	16.5131	8.0915	7.39674	31.2031	23.0592	34.556	11.6181	27.7743	22.7625	17.3414	12.7672	10.0992	4.61407	5.91054	10.1855	18.7631	16.5014	13.2847
Aco022207	76.7298	14.7708	61.959	-47.1882	0.782165	1.76459e-08	salmon	805.38	842.977	724.168	802.962	608.74	603.932	1165.85	607.342	630.582	1162.76	576.719	462.747	862.627	496.466	398.967	667.894	392.233	415.184	665.049	265.042	248.52	1360.27	1678.64	990.497	577.527	689.555	1597.85	757.835	398.669	319.938	312.912	277.794	253.74	1081.49	895.861	694.31
Aco014170	18.8759	3.29836	15.5775	-12.2792	0.677821	5.58453e-06	salmon	9.57283	1.66107	3.14231	9.14307	1.01587	3.30359	20.0684	3.28829	1.79266	10.5756	0.342465	0.183558	9.09445	0.42214	0.234073	12.4616	1.93158	1.7225	9.81368	0.986773	3.08768	0.484722	14.9377	26.1507	0	2.1766	8.50802	0	0	0	0.453225	0	0.470807	0	0.834784	0
Aco011768	81.1679	21.4456	59.7223	-38.2766	0.794604	7.20414e-09	salmon	33.2168	29.3512	25.0769	28.8205	27.5661	21.711	31.9071	28.2514	24.3244	43.3185	21.8538	22.8593	35.3053	24.4879	21.0121	29.5066	23.0204	24.48	40.1152	32.7045	27.5042	35.0948	37.3985	34.3426	22.159	32.3698	34.0036	27.7875	26.7182	20.8001	19.7789	22.5804	21.606	33.6601	33.1308	30.1535
Aco000488	48.003	16.4542	31.5488	-15.0945	0.825719	5.70611e-10	salmon	51.0148	42.303	39.9163	67.9613	42.6969	33.3587	48.2613	24.4338	19.8419	51.2437	31.1185	34.1777	44.6959	29.7481	21.3854	49.3815	26.0014	19.4034	36.8836	9.13917	25.8799	45.5795	62.3563	40.4321	19.2477	37.9306	47.6824	40.2604	22.3223	23.6741	25.346	18.5947	27.7899	22.3171	18.5366	23.6458
Aco018854	45.652	27.301	18.351	8.95001	0.723132	6.30137e-07	salmon	5.60028	0.823748	0.269278	9.59369	1.00316	0.2902	24.9209	0.816028	0.077115	41.2401	2.17802	0.226689	17.0067	1.93061	0.065177	7.39164	0.796399	0.041534	2.62058	0.987878	0.198556	3.06507	3.43811	0.210838	0.175008	0.352258	24.6892	0.767246	0.246542	0.23471	0.54584	0.06276	0.067213	0.085935	0.034625	0.199795
Aco000589	21.9336	5.87591	16.0577	-10.1818	0.65879	1.25171e-05	salmon	189.289	167.969	117.021	170.421	144.435	82.6675	132.323	111.557	77.3132	142.253	92.5476	69.9365	117.23	103.669	80.3095	143.764	111.598	70.4305	155.804	150.481	123.275	130.222	157.199	186.114	108.191	127.894	133.785	123.758	102.454	110.488	93.7548	67.1595	90.6174	166.76	157.767	159.63
Aco003424	20.7575	7.3264	13.4311	-6.1047	0.742979	2.10939e-07	salmon	18.7675	19.0334	11.3295	14.5294	11.7713	9.66452	15.1667	14.669	10.9363	28.8007	10.0332	2.34147	13.5447	9.97216	4.25781	10.6106	6.53106	3.61415	27.4278	13.1123	10.8222	13.4081	15.4275	15.0147	7.21541	4.6302	21.9442	17.0917	5.08011	4.06345	8.38095	6.766	7.62936	18.0651	20.0258	15.2488
Aco010302	52.3867	15.4113	36.9755	-21.5642	0.80672	2.83369e-09	salmon	16.5246	11.3868	15.628	16.2581	10.5653	16.3486	13.3111	4.45663	4.57347	19.3771	3.96815	12.9985	18.776	3.43131	8.17587	15.5016	1.63434	3.20691	16.2462	1.51002	2.04372	24.3222	21.7988	18.9822	6.16822	10.9547	20.2227	0.365487	0	0.392189	0.658305	0.821988	1.32136	7.51532	6.7102	7.53069
Aco009699	60.553	25.9132	34.6397	-8.7265	0.876891	2.34362e-12	salmon	73.3599	49.3408	45.3491	62.1277	40.076	35.4804	68.6063	34.4661	28.9743	66.9222	34.484	25.9926	48.6501	36.5673	31.2859	33.0014	30.6902	43.3064	53.5224	45.5315	45.1286	64.3076	62.3019	47.7254	24.7757	48.0278	67.1736	25.3805	22.6353	20.0668	20.0815	18.3156	21.0479	33.8401	26.204	27.3206
Aco015354	54.8972	24.932	29.9651	-5.03311	0.829951	3.8896e-10	salmon	13.9944	14.3724	15.3874	10.5546	11.9297	13.4929	15.4264	12.4953	10.8609	19.5156	11.8294	9.76909	16.8123	13.0084	9.10451	12.5017	9.20227	10.0974	16.6719	11.9158	9.69001	15.9792	16.4222	19.0431	7.89026	15.1363	18.2194	9.81089	9.39561	9.08897	9.0832	8.68629	8.85499	12.235	13.0663	11.0279
Aco003861	67.6789	14.5956	53.0833	-38.4877	0.769278	4.20732e-08	salmon	12.7936	12.2555	14.0548	11.3734	11.7742	13.9022	12.4162	13.3459	11.4644	22.0617	9.93204	9.5172	19.1046	13.171	9.28914	13.1139	8.41714	11.5193	20.965	13.656	10.032	21.0254	18.2364	16.9248	10.1268	14.0826	17.0939	13.8172	10.736	11.9151	7.26815	9.13634	7.02445	11.3659	11.149	8.61242
Aco014640	19.2562	8.92848	10.3277	-1.39924	0.723038	6.33264e-07	salmon	97.1646	44.5391	26.7743	109.847	45.8826	27.0252	100.363	93.7655	31.7448	71.3225	11.7011	3.33876	56.0806	12.0763	12.5776	27.2796	9.54714	7.59905	16.3999	0.625083	0.989377	20.4151	67.321	58.6353	56.3434	1.49805	43.9193	35.7276	16.5786	5.37338	0	0.094631	0.154221	3.15245	16.5716	4.78294
Aco014868	21.2531	5.18956	16.0635	-10.874	0.639555	2.67741e-05	salmon	1.49126	0.174848	0.143594	3.61113	0.752051	0	5.16226	0	0	12.4599	0.904675	0	6.42725	0.756069	0	1.73828	0	0	1.22228	0.262202	0	0	1.19082	12.072	0.531883	0	2.09181	0.970629	0	0	0	0	0	0.656024	0.408512	0.424411
Aco009551	17.6905	3.20236	14.4882	-11.2858	0.65533	1.44083e-05	salmon	375.857	318.004	265.459	350.464	276.398	255.452	324.545	214.508	226.567	351.933	269.19	302.209	360.627	263.748	269.247	488.79	222.825	216.307	217.276	130.724	203.733	291.962	341.726	301.305	173.907	249.034	339.784	240.378	152.572	148.198	280.143	208.766	228.579	196.603	209.619	169.313
Aco013484	33.9497	13.6411	20.3087	-6.66762	0.736148	3.10783e-07	salmon	72.6008	60.3819	61.0973	63.3308	48.6533	48.2735	63.4037	49.7554	48.2382	71.646	41.3686	46.242	58.6762	45.8627	50.0167	43.5469	48.8771	47.2854	66.0461	65.681	64.1404	78.9232	62.4512	56.5659	35.0124	64.5322	72.6124	67.7148	52.4157	36.9768	38.2248	35.9588	44.0342	56.7939	59.2744	54.4402
Aco003247	39.5271	19.0106	20.5165	-1.50593	0.786614	1.28957e-08	salmon	33.5854	30.8531	34.0435	26.9034	25.3695	30.8012	30.7939	23.0679	21.8991	36.9521	23.5934	24.343	30.7615	26.8862	20.9273	22.2749	18.7882	23.5972	30.1064	21.3012	17.6003	32.472	32.3788	36.9839	16.7488	34.7584	37.5694	24.3235	22.2684	21.9752	18.5512	15.3114	15.0647	30.9223	29.5742	29.7296
Aco005470	52.052	26.4622	25.5898	0.872459	0.753471	1.13553e-07	salmon	0.396706	0.213835	0	0.940877	0	0	1.74635	0	0	3.08441	0	0	1.68876	0	0	0.490341	0	0	0.448486	0	0	0.193909	0.375016	0	0	0	2.02713	0.176661	0	0	0	0	0	0	0	0
Aco006506	72.0456	32.5283	39.5174	-6.98909	0.911158	1.20103e-14	salmon	117.104	79.1486	45.349	126.525	86.9244	33.5848	91.1741	49.8866	16.1104	159.919	59.3254	17.6696	71.124	43.0906	15.4627	48.7741	34.6567	7.60897	75.8842	24.8411	9.24225	56.5508	86.6155	100.386	25.3998	27.1575	77.7235	44.9232	27.6984	13.7853	22.6617	16.0578	13.0881	55.4896	35.9285	36.4147
Aco014735	55.3316	20.0132	35.3184	-15.3052	0.803086	3.77392e-09	salmon	35.9072	42.4567	31.7942	31.7298	31.9568	25.1862	33.8011	28.244	20.9621	36.2343	26.6417	21.6652	32.5277	26.4662	19.1473	30.2645	28.3612	21.4084	36.6055	36.6897	23.5818	36.3409	29.4926	36.7367	20.8189	31.4202	30.2774	29.3752	21.3064	19.5656	21.6092	19.8345	20.4708	27.2123	24.1606	27.6445
Aco011956	85.5857	14.9078	70.6778	-55.77	0.829457	4.06954e-10	salmon	38.1561	31.3009	34.8941	38.1937	29.0102	35.4409	43.8324	29.0302	28.5377	57.5325	22.2809	28.3389	45.4606	24.6414	29.3434	41.5218	25.1706	38.413	37.3709	32.1855	32.7793	46.2637	49.1593	37.6741	29.9635	32.2381	54.5011	30.2651	38.87	25.4791	16.9186	14.9551	20.1843	25.7555	26.1247	25.4611
Aco017115	22.9845	8.41687	14.5677	-6.1508	0.714752	9.7308e-07	salmon	68.491	56.9697	51.437	54.5595	44.1743	47.1911	37.7433	46.0558	39.7482	54.1664	31.8161	32.0364	42.843	33.3806	38.1267	41.9038	39.2983	39.3922	51.5091	53.652	56.5316	62.0845	54.6635	60.5526	33.7608	52.9919	54.0327	54.8629	36.8819	26.039	18.9852	20.9408	27.114	37.3253	36.2858	31.0955
Aco020501	48.4712	11.7204	36.7507	-25.0303	0.793311	7.92962e-09	salmon	7.63666	4.59777	2.19098	5.56951	4.53967	1.60262	7.78247	2.08253	1.83356	6.43484	3.30916	1.58362	5.66603	2.68904	1.91536	6.83685	2.4863	1.08875	4.8371	1.8476	0.751047	5.35252	5.89587	4.65629	1.97189	1.65182	4.72114	3.74468	7.648	2.60731	0.433585	0.429364	0	1.40073	3.26914	2.61947
Aco006079	155.027	18.781	136.246	-117.465	0.822954	7.28955e-10	salmon	7.776	4.66898	1.92004	6.76131	4.14849	2.29049	8.38996	3.10866	2.51895	8.04893	1.09993	1.24685	8.07382	1.91282	1.19302	10.2259	0.622082	0.715969	7.7818	0.940313	0	3.64036	6.66629	1.68622	1.41263	0.547243	7.26701	3.79038	4.54258	2.61908	0.034375	0.138858	0	0.891591	1.74646	1.11212
Aco023423	103.307	34.6786	68.628	-33.9494	0.862979	1.29376e-11	salmon	19.7132	17.1647	15.1949	14.5984	11.8399	11.6939	16.8642	12.9771	9.13999	22.0329	11.0713	9.0332	20.17	12.4116	8.27063	13.3126	9.95702	9.26529	19.4928	19.8659	11.1956	20.4934	21.9797	17.8553	8.62931	14.9916	23.542	13.7892	10.2924	9.6792	8.33077	9.01621	10.3936	16.2021	13.6921	14.7427
Aco009024	2.61831	1.11335	1.50495	-0.391598	0.314625	0.0616361	salmon	87.5517	111.094	39.243	125.104	105.934	35.4013	164.009	144.953	52.6092	673.544	212.451	86.8806	343.209	155.498	130.5	202.605	121.34	245.798	72.2365	77.4356	117.78	61.7739	58.2201	197.896	214.384	249.611	136.547	57.3535	29.3253	49.683	171.235	58.8584	276.367	156.216	172.087	135.172
Aco029517	18.9656	8.02548	10.9401	-2.91464	0.555441	0.00043731	salmon	101.332	37.7073	21.4068	114.757	27.4227	22.4186	77.1109	9.49914	0.516819	5.0657	2.16262	0	2.60657	4.97411	0.588607	1.9658	1.51187	0.420465	9.58081	0.200017	0	11.0557	42.3488	0.113604	0	0	35.107	0	0	0	8.13473	12.1393	11.3863	0	0	0
Aco002859	38.9553	5.26166	33.6936	-28.4319	0.685627	3.94191e-06	salmon	24.7647	30.1932	25.9306	23.8851	21.649	30.1873	40.0469	32.3905	23.1389	42.4175	23.7667	24.974	41.3551	32.7799	21.9541	29.3861	25.7519	27.4022	26.3337	42.0727	25.2796	64.5606	47.1314	39.7967	21.2294	19.8715	52.6203	16.5042	11.7057	16.128	6.81366	4.76262	6.21263	13.5812	13.8765	13.6988
Aco009076	19.9518	5.33266	14.6191	-9.28648	0.709087	1.29431e-06	salmon	5.03385	4.04158	0.984115	3.79644	2.7475	1.98978	2.76915	3.3539	0.35743	2.10155	3.13813	0.749669	3.52016	1.88832	1.26781	2.40523	0.540671	0.546446	4.19772	1.61692	0.363984	2.15916	2.94951	5.75562	0.461178	2.80888	3.59038	0.616641	0.686535	1.39607	1.09118	0.847044	0.530645	0	0.45126	0
Aco009177	24.3607	8.93358	15.4271	-6.49352	0.680916	4.87025e-06	salmon	28.0228	11.8508	7.05781	23.1152	13.0137	7.69411	53.4979	19.0754	9.84031	47.5615	17.0471	7.43335	43.3409	19.108	6.99104	5.644	10.2889	2.88686	1.43449	0.444764	0.652224	7.44217	14.0759	1.50498	2.10293	0.339554	75.0603	14.7192	9.7549	15.0583	1.84222	0.981156	0.637167	0.766113	0.283307	1.94269
Aco018711	127.121	17.4572	109.664	-92.2071	0.803437	3.67198e-09	salmon	34.8802	28.3984	23.3834	27.8894	24.2397	22.3151	30.97	27.3428	23.4578	38.3763	21.6671	20.464	37.7604	23.8959	19.6152	26.1955	21.2461	22.646	39.4789	35.1502	25.6522	35.8184	44.1845	27.4622	21.8193	25.0766	43.5845	36.7615	25.6531	23.0261	20.9572	16.6898	15.0993	27.9224	27.5879	25.85
Aco031551	23.9131	9.43706	14.4761	-5.03899	0.674602	6.42771e-06	salmon	37.4608	15.1283	8.70141	34.9806	18.8575	12.1952	79.68	30.2015	15.5369	65.3066	32.1358	8.86224	53.1312	29.9594	10.7298	14.1603	13.7956	3.28209	2.03777	0.997295	1.09393	11.0867	19.1641	1.40641	2.14932	0.418635	92.2685	16.4157	13.8294	21.8562	3.84504	1.03682	1.00933	0.815235	1.06329	0.759017
Aco003815	21.8071	5.04152	16.7656	-11.7241	0.69149	3.01331e-06	salmon	41.9446	47.6212	40.1603	42.1078	53.4401	34.8074	45.5921	44.0629	37.666	60.1246	42.8549	35.778	44.0511	41.2205	32.264	31.6568	28.9736	37.0882	46.249	22.5792	26.1421	66.0942	49.6654	41.2504	33.1911	38.9379	48.2131	39.3924	37.9215	36.3673	26.3793	32.4562	31.6316	20.1626	26.8932	21.3122
Aco015554	19.3369	7.49396	11.843	-4.349	0.612843	7.0887e-05	salmon	42.1783	15.2842	6.36695	31.714	9.65537	2.0731	12.4597	2.17676	0	0.060921	0.247025	0.036202	0.931415	0.741786	0.136873	0.349615	0.229495	0	1.72274	0.037591	0	24.5575	20.4885	0.150437	0	0.291579	18.7615	0	0	0	0	0	0.051246	0.067775	0	0
Aco027872	13.5515	4.2241	9.32741	-5.10331	0.676757	5.85118e-06	salmon	10.4678	11.0757	10.01	9.86178	7.53376	7.46683	10.1244	8.44187	6.47779	11.0073	8.03869	6.38869	9.95477	7.84399	4.97451	8.91308	10.8224	5.68985	10.1956	11.5415	8.51887	8.62886	9.46141	9.74385	5.92506	10.3414	8.76439	9.01779	5.90609	5.09618	7.28056	5.91938	8.35662	7.06195	7.2592	6.3205
Aco013440	14.1488	6.47823	7.67059	-1.19236	0.508708	0.00153439	salmon	205.853	123.464	76.6533	200.442	85.8376	52.9311	59.5449	134.204	47.6794	4.24911	3.63445	10.1688	6.26336	23.5414	8.09183	3.81465	31.7098	9.279	42.1674	2.96779	5.24536	57.2844	87.5329	5.96441	34.3735	5.07407	218.141	4.13734	4.67442	5.86734	14.6604	44.5971	27.0273	12.8059	25.9913	20.2221
Aco005495	63.816	28.3068	35.5092	-7.20236	0.889208	4.30759e-13	salmon	47.3652	37.0494	32.7495	39.9818	28.8814	25.8147	41.6432	25.0996	16.7528	64.1373	28.6552	13.2154	35.323	28.965	22.7306	39.6021	29.4567	20.9555	38.7438	31.2603	28.6584	48.7589	43.946	37.8077	20.2702	34.6468	42.6787	35.8298	10.1435	12.9569	23.5946	17.2696	21.3053	24.8415	21.6015	21.1082
Aco018718	32.993	6.11291	26.8801	-20.7672	0.711122	1.16916e-06	salmon	11.4531	12.2506	8.65676	13.1524	12.3018	12.1545	18.9495	11.9107	8.29623	13.9662	12.0888	6.91809	13.3997	15.0629	7.35148	14.5391	9.24723	6.49292	8.65284	6.04155	7.37427	13.3418	15.5673	11.6226	8.13981	8.30579	14.169	12.041	9.65447	10.1056	5.99854	6.55676	8.0711	4.48536	5.17271	6.37373
Aco007148	124.537	29.02	95.5168	-66.4968	0.886277	6.56043e-13	salmon	71.9376	66.3842	40.2842	88.6111	70.5692	41.1969	95.1206	50.3593	30.1874	92.4889	61.2473	34.037	89.8949	57.2365	30.7366	92.2425	47.9459	35.5133	83.2322	34.5895	27.4618	87.5522	86.4384	92.8381	48.9113	48.2272	85.8945	73.4684	46.3634	38.4034	29.1298	29.4204	31.9578	39.3544	45.266	29.2698
Aco013120	68.5328	20.4037	48.129	-27.7253	0.822688	7.46153e-10	salmon	233.002	113.623	131.315	246.159	140.778	136.157	228.514	126.156	103.052	199.48	48.6104	44.2891	164.481	39.3188	58.169	151.085	25.3448	32.7703	166.334	60.4269	25.0438	98.989	233.674	146.1	122.909	51.7526	271.094	236.134	149.894	99.7315	5.16118	4.79545	5.38606	27.84	55.5217	29.4613
Aco002796	78.1639	32.9826	45.1813	-12.1987	0.91115	1.2028e-14	salmon	104.604	82.2169	50.6746	95.267	75.602	58.1802	89.1943	69.2218	22.0575	170.979	60.1059	31.1535	85.977	71.5014	17.8861	52.8917	47.2813	12.3946	71.6971	41.9658	14.5845	68.1164	112.38	81.8632	26.0125	12.4379	107.635	51.243	11.3969	30.0216	5.74611	2.81144	3.22643	5.64638	9.05763	7.25234
Aco006404	21.2726	6.59647	14.6761	-8.07964	0.73583	3.16354e-07	salmon	39.7966	34.8468	31.4786	37.8505	34.3678	25.956	33.2372	28.5227	28.3836	51.3763	32.467	27.8162	46.0837	31.9099	26.338	40.3737	27.6089	21.1326	32.8669	26.1014	25.9591	33.8985	37.9468	31.8473	25.2151	34.9858	39.8743	52.1024	41.1278	33.7405	21.2078	20.4641	23.8264	27.2727	27.3935	26.0825
Aco012423	23.3669	6.08845	17.2785	-11.19	0.737903	2.81655e-07	salmon	2.81123	4.27417	1.67265	4.31425	2.38761	3.4832	6.78037	3.52662	1.60787	10.2709	7.37216	0.737557	3.98039	7.07176	0.19158	2.92271	2.47023	0.162208	6.17373	0.744966	1.11632	7.13383	6.95705	4.24104	1.71681	1.03581	6.23556	3.65431	2.97176	3.5028	0	0	0.286828	1.47268	2.61115	2.80198
Aco014998	25.5265	9.06914	16.4574	-7.38825	0.770925	3.77689e-08	salmon	0.683718	0.797971	0.359406	0.533038	0.694224	0.474902	0.576916	0.495004	0.405113	1.20381	0.507106	0.376791	0.449787	0.519821	0.326959	0.169152	0.2759	0.267793	0.881312	0.329327	0.035755	0.731193	0.371218	0.882098	0.498594	0.378818	0.940804	0.105157	0.110724	0.084529	0	0.08083	0.057228	0.09909	0.168189	0
Aco015503	24.4386	7.36381	17.0748	-9.71096	0.73828	2.75722e-07	salmon	110.831	118.285	51.9928	81.203	84.9465	44.2291	108.641	44.7219	13.2252	107.614	34.133	3.28909	122.571	41.5763	4.9447	101.851	39.5744	13.0903	58.6561	130.832	60.5519	88.7568	43.6011	111.442	31.2651	11.3903	40.5001	47.3361	14.062	11.2386	2.75738	1.83276	1.25013	5.36211	18.898	10.0265
Aco008223	33.0318	19.5232	13.5086	6.01462	0.737486	2.88337e-07	salmon	0.269365	0.28088	0	1.50012	0.164506	0	2.95143	0	0	4.55875	0.779232	0	1.40677	0	0	0.555472	0	0	0	0	0	0.299451	0.661852	1.50854	0	0	2.56961	0.6094	0	0	0.136905	0	0.05464	0	0	0
Aco000451	36.6972	24.7565	11.9408	12.8157	0.69449	2.62e-06	salmon	13.4859	2.50321	0.46235	20.8537	2.14519	0.698342	57.9671	1.34973	0.243641	113.631	2.727	0.449806	41.3911	4.23811	0.368154	18.5086	0.718197	0.378641	5.76476	0.056308	0.042904	6.98183	6.02018	0.174245	0.512387	0.047882	37.9038	2.73377	1.03909	1.03103	0	0.028036	0	0	0.087937	0.045778
Aco031030	10.1856	5.26156	4.92399	0.337565	0.662544	1.07234e-05	salmon	24.1122	22.5749	13.3668	31.5014	19.0622	14.8571	24.9198	19.5622	30.4838	45.0059	22.0246	18.2889	31.4898	15.7582	24.7886	18.0484	12.6673	19.2107	18.7478	10.9675	9.27602	5.56262	24.1669	10.6871	6.28639	9.76468	37.4402	20.7911	14.2243	11.3634	8.84219	9.19958	7.18272	10.52	9.71001	14.2462
Aco003184	115.176	20.8346	94.3416	-73.507	0.833196	2.87846e-10	salmon	26.1737	25.6317	18.3568	26.347	22.9266	19.5149	30.4073	23.2531	16.2484	35.0019	23.3009	14.1879	32.3988	23.4401	16.1553	22.0617	18.8057	20.8313	35.1473	30.7657	24.9619	33.7878	30.6471	24.7852	17.3018	19.6223	40.7411	25.4242	18.8533	15.1139	12.563	13.6336	12.8761	24.499	22.6343	22.6118
Aco016759	25.3705	5.06948	20.301	-15.2315	0.659629	1.20944e-05	salmon	8.90352	10.6444	16.5158	9.09873	11.0471	15.3169	9.52809	9.37412	6.45586	14.6084	6.51175	7.30142	12.5997	8.45843	5.53038	9.88843	4.28882	4.22488	9.24301	4.48885	2.13021	22.162	15.7905	13.894	10.4481	11.8914	10.9514	8.10761	6.33691	8.2911	0.341635	0.623696	0.818695	1.08771	1.95907	1.15196
Aco025405	75.1569	28.6468	46.5101	-17.8633	0.871454	4.6781e-12	salmon	151.55	142.493	127.679	140.275	113.13	92.0389	136.74	74.0778	64.6723	136.207	72.1571	73.6544	111.703	75.389	64.4261	102.844	68.854	66.6833	122.993	83.6899	49.9065	167.454	131.387	107.094	62.88	138.177	134.351	68.08	38.1583	53.3019	25.0482	17.972	15.2536	58.11	53.551	44.0228
Aco002942	70.1426	26.8042	43.3384	-16.5342	0.861473	1.53931e-11	salmon	148.581	142.401	62.8236	122.417	96.9353	48.4557	107.592	56.5375	24.2299	170.788	91.2515	33.4417	133.015	89.5916	30.7987	116.134	62.1187	38.3343	71.3904	82.3971	46.6633	145.556	118.038	196.396	45.3926	81.8892	113.128	75.5705	19.4897	18.0996	26.9028	10.2888	16.3809	105.444	54.8484	58.8496
Aco011920	23.9467	8.89589	15.0508	-6.15494	0.665168	9.61169e-06	salmon	1.55222	0.097991	0.447586	3.35825	0.44723	0	6.64125	0.246997	0	4.13918	0.250188	0.118925	2.79774	0.397341	0.076016	1.03988	0	0.180176	0.468489	0.103062	0	0.334203	0.690032	0.151332	0.490399	0	1.77182	0.880424	0.15621	0.115385	0	0.306554	0.235081	0	0	0
Aco002488	100.828	21.083	79.7447	-58.6618	0.776765	2.55731e-08	salmon	65.0132	33.2024	3.17492	87.9388	30.7147	1.64674	210.421	12.8357	0.319945	202.097	21.8339	0.190712	170.562	18.0756	0.264981	137.305	4.49354	0.825047	61.8261	3.26546	1.17145	11.4195	51.182	17.2003	4.21603	0	142.998	52.6274	7.3815	2.57914	0.066852	0	0	0.290305	0.972215	0.23506
Aco002022	41.5615	19.9708	21.5907	-1.61981	0.834487	2.54905e-10	salmon	30.345	15.6745	6.32387	43.2483	16.2873	6.50766	19.9264	3.07006	1.84186	28.2922	10.2357	1.27648	15.4556	3.26902	0.619948	6.03007	1.05019	0	5.02065	1.20398	0	8.09175	30.406	24.6297	7.4865	0.250055	32.555	7.57577	4.20014	7.43413	0.345257	0.577363	0	1.99092	4.05872	3.57875
Aco015188	59.9963	26.3257	33.6706	-7.34485	0.884572	8.33408e-13	salmon	103.026	82.3656	46.9286	109.473	82.6874	38.7099	90.3113	62.865	26.9888	180.916	68.3162	28.3198	103.209	65.8473	25.2876	54.363	54.6723	31.168	70.8995	66.0385	29.2477	45.1104	76.1437	83.3062	40.6217	56.7637	84.2583	84.0246	46.7065	40.5406	13.0544	12.6962	14.3165	44.257	39.2182	34.2343
Aco007048	67.589	27.9253	39.6637	-11.7384	0.887536	5.4834e-13	salmon	51.5415	36.9719	17.7697	41.466	24.4586	16.8592	37.2768	14.8376	13.11	41.3788	16.4837	11.4414	34.9084	17.2311	13.4664	21.2706	8.90486	14.1425	43.8538	13.6897	9.08253	22.1061	45.75	23.9158	8.39507	17.0035	41.5408	16.476	12.5715	7.42536	2.74241	4.4118	3.60862	33.6391	24.1038	25.5096
Aco024143	22.5899	3.49177	19.0982	-15.6064	0.516834	0.00124931	salmon	76.7724	70.902	60.1521	68.8045	51.4019	47.2909	61.8821	46.3323	45.1971	89.3011	46.6679	53.9709	75.1219	51.5584	54.3162	63.0861	64.1402	57.6722	66.8486	97.1549	76.0686	68.1853	61.1755	100.047	45.1676	99.397	74.5617	45.7864	35.3253	28.8822	35.8351	31.2769	37.8418	96.7248	73.2897	76.2189
Aco006725	36.5071	11.7219	24.7852	-13.0634	0.744423	1.94038e-07	salmon	76.8103	57.785	45.5437	89.206	69.5449	43.4204	82.1938	66.2331	41.1535	123.32	52.9032	37.3549	88.0431	51.6439	34.6931	81.5663	52.0031	28.5189	88.0036	54.7085	31.7323	34.8647	67.2621	80.9764	80.3538	36.5791	85.2714	95.1577	75.6379	63.7875	39.5248	25.985	30.5211	38.6927	39.9312	40.9645
Aco000178	28.265	9.76639	18.4986	-8.73222	0.722252	6.60015e-07	salmon	108.078	102.026	55.2847	92.5071	111.742	65.2923	128.773	68.1085	39.8173	77.2151	29.3543	23.3976	47.1995	23.601	14.2034	29.1516	10.5446	7.10952	50.8986	1.88541	4.15834	10.2846	139.984	15.0752	26.1386	1.37497	151	90.0386	41.4654	32.7379	1.84114	3.9462	2.24809	12.9246	30.602	22.4771
Aco023310	82.8895	37.5367	45.3528	-7.81613	0.880972	1.36507e-12	salmon	49.3637	47.9794	39.8783	42.5162	39.0062	25.1723	37.5492	30.7238	21.5841	53.0779	31.6788	19.7425	42.1444	30.3464	18.6672	27.1377	25.992	19.6671	37.0091	35.5664	22.3414	64.654	41.2597	41.7165	19.2267	34.7937	49.0714	26.3395	15.2092	15.8603	16.7422	13.7828	11.5822	29.7345	27.6257	26.5782
Aco004928	59.5282	25.0132	34.5151	-9.50191	0.853377	3.787e-11	salmon	48.1989	44.9756	32.0207	44.9543	41.7261	27.9135	40.982	33.4017	24.1716	61.039	32.8879	21.7156	43.0615	37.2137	21.4109	39.9806	31.9694	23.0734	53.2104	38.5792	26.5299	38.3022	39.1822	51.677	28.6139	36.1595	42.1049	38.5442	31.0831	23.1492	23.2533	19.9738	26.6709	43.9426	40.8665	37.2335
Aco000844	105.871	45.8063	60.0648	-14.2585	0.932738	1.25463e-16	salmon	46.748	37.2353	31.9183	40.9675	28.1542	24.1458	43.2877	22.3836	10.0415	51.3463	17.7226	14.0359	34.1749	18.3157	8.48989	24.1838	11.4768	5.70866	30.6693	25.9867	13.6223	50.0017	49.4781	48.2494	15.2457	25.9774	58.9045	10.5908	2.2253	5.9602	1.19732	1.2567	1.38037	16.9287	14.7924	12.0326
Aco000456	61.6242	23.446	38.1782	-14.7322	0.855029	3.16536e-11	salmon	18.3211	17.1284	15.1737	15.3604	13.1118	11.2399	18.3676	10.1529	8.49661	31.2943	14.2567	13.793	25.4045	15.0902	11.9108	21.9747	13.3373	11.0631	17.9908	15.9389	13.3604	19.2079	19.2679	19.9387	7.97314	20.7729	22.3399	15.8401	9.05538	8.30991	4.39954	3.57868	5.21834	15.7866	12.4215	11.4671
Aco001532	25.8869	10.7976	15.0892	-4.29162	0.789641	1.03733e-08	salmon	23.0489	17.3332	9.564	43.5353	10.868	13.9308	35.0675	9.47869	3.30959	37.5834	9.36966	5.30474	15.7739	14.4015	3.26897	5.0108	7.3202	6.67754	5.26163	17.2664	2.79705	2.22481	30.548	32.7471	10.3387	9.37938	25.785	7.54477	1.84128	6.48032	0.216564	0	0	0.458737	0	0.558922
Aco013181	84.0338	19.672	64.3618	-44.6898	0.802298	4.01307e-09	salmon	36.56	32.1575	24.3212	49.6987	39.3657	26.3369	65.0466	28.0118	22.9908	122.706	36.1892	31.6056	95.0616	31.1654	30.4475	67.5852	22.3084	29.1705	62.4856	16.6239	17.3723	47.477	59.3999	49.3569	26.3088	34.0547	63.4928	44.559	36.7847	31.0887	12.4745	17.6506	18.4846	19.7958	20.2759	17.5264
Aco000832	105.23	37.0858	68.1444	-31.0586	0.906716	2.65782e-14	salmon	34.1782	28.1822	24.8061	28.4724	23.2074	18.1084	28.5388	23.0608	19.3525	34.6333	15.6053	15.6363	34.3049	19.9312	16.6844	29.783	15.8264	18.7819	30.0783	18.8901	10.8558	33.514	33.3861	31.875	17.0293	23.1478	30.2365	25.8723	16.7749	13.911	4.67354	3.6867	4.53492	23.5205	24.4192	19.864
Aco013063	11.3997	6.15395	5.24574	0.908216	0.494174	0.00218896	salmon	309.098	314.956	145.347	849.976	495.657	12.8159	1576.53	737.125	39.101	10089.7	3148.81	65.8316	2770.43	1008.8	38.6012	746.604	207.951	38.8143	45.7964	13.5594	3.25359	74.1844	27.7093	599.648	420.887	10.7295	173.531	1935.69	371.946	163.392	0.120672	0.129315	0	6.43937	21.4061	5.94934
Aco006724	73.9266	29.6253	44.3012	-14.6759	0.887258	5.70651e-13	salmon	92.2603	75.5187	43.3091	85.0792	66.5023	36.9082	78.38	55.6326	32.5302	97.4725	50.638	25.9934	68.6438	42.6315	25.843	63.488	36.5566	23.2356	79.7391	45.2758	21.8666	57.8239	80.232	84.9612	51.8509	42.708	77.697	78.5589	69.8201	52.99	16.5148	11.9165	16.3562	43.2381	51.9066	45.0918
Aco013212	63.063	14.6507	48.4123	-33.7616	0.812029	1.844e-09	salmon	12.2729	15.1642	6.4819	12.948	10.7978	5.17466	18.5	10.2426	4.13255	26.0322	11.014	3.28091	15.015	13.0739	3.92817	16.8843	14.2952	3.98044	16.1119	8.66225	4.87534	7.24997	22.2784	11.3837	10.7255	4.95758	16.1646	11.7225	7.71773	8.58503	2.83852	2.32854	3.19306	8.30131	6.46537	5.52284
Aco017514	27.1521	9.43255	17.7195	-8.28698	0.644645	2.20061e-05	salmon	62.482	68.7167	61.2673	46.0248	56.1418	48.227	49.7524	51.3845	38.0174	74.3	47.3218	36.3524	65.0953	57.3823	37.913	37.4886	45.8364	52.6608	62.1777	63.3644	43.3486	63.3785	62.3356	73.8575	38.3904	65.7007	65.3084	47.5543	45.01	40.8718	49.2574	39.7391	43.948	67.67	60.4055	57.2436
Aco012834	16.7628	4.67428	12.0886	-7.41429	0.68651	3.78719e-06	salmon	4.79335	5.7937	6.28822	4.22582	4.49489	6.17242	8.88185	9.82611	5.11083	15.1601	8.78713	5.95717	7.4303	10.2202	3.15779	0.839978	3.65119	2.03413	5.16182	4.01366	1.22851	10.1502	15.6857	10.5328	2.28086	4.95463	18.3067	0.045559	0.15917	0.180523	0.586195	0.723769	0.79664	0.833584	0.870335	0.486582
Aco004054	6.61291	4.65017	1.96274	2.68743	0.476515	0.00330302	salmon	16.1428	4.82318	0	15.0811	7.22806	0.373356	13.3658	0.367337	0.326478	158.524	1.72138	0.133991	16.2035	0.230114	0	3.6046	0.505555	0	2.04856	0.604028	0	0.632501	1.81607	0.522426	0.120656	0	1.41346	37.8241	27.7089	3.80642	0	0	0	10.0637	5.39027	18.1584
Aco005555	41.8353	14.467	27.3683	-12.9013	0.805424	3.14081e-09	salmon	78.4394	72.7497	38.4658	77.5391	49.3681	33.0083	53.5231	32.539	19.881	63.0505	27.2395	13.2496	36.4915	31.3116	12.3324	38.6465	38.1477	16.579	75.0418	53.7999	55.742	44.3553	52.2043	60.3893	41.1009	34.8979	56.5171	43.6395	21.6278	30.4495	3.7941	3.09422	1.55894	28.8248	29.0129	26.0618
Aco004316	101.404	28.6843	72.7198	-44.0355	0.876283	2.53603e-12	salmon	128.08	121.549	96.3052	100.725	83.4671	83.8284	101.299	68.6398	54.8533	104.932	68.2548	55.0875	92.1524	75.3782	55.2609	71.2268	62.8483	53.0576	82.728	64.6858	40.6772	86.6238	114.205	114.733	56.0427	84.7842	108.024	53.0925	40.2943	46.1073	7.6515	8.36063	10.5579	55.5129	51.0186	39.2286
Aco016181	88.711	35.9407	52.7704	-16.8297	0.904061	4.19444e-14	salmon	36.5255	27.9368	21.4815	30.7666	23.8727	16.705	24.1154	15.2199	9.11777	39.0861	13.925	7.6865	21.1248	15.7234	8.64438	16.0718	8.66765	9.26194	21.6782	23.668	14.4015	24.9094	23.6061	26.1084	7.74974	20.7104	25.5653	8.02285	3.67546	2.54488	3.14157	2.89635	3.86722	16.825	13.153	9.71649
Aco008585	89.9022	18.7284	71.1739	-52.4455	0.812063	1.83889e-09	salmon	18.9833	16.261	4.7542	21.7621	9.7358	5.24837	20.7267	5.823	0.429514	5.55727	3.50897	0.57738	11.2926	5.38218	0	11.2357	4.22206	0.851292	16.5616	3.21009	0	27.2713	21.2433	15.0227	2.87096	1.32701	21.317	9.49013	2.37771	2.03769	0	0	0.140053	3.13032	7.39098	4.03812
Aco012738	3.44931	1.88065	1.56866	0.311983	0.39908	0.0159043	salmon	0	0.30148	0	2.76122	0.615663	0	0	0	0	0.228288	0.463473	0	0.298602	0	0	0	0	0	0	0	0	0	0	0	0	0	1.35264	0	0	0	0	0	0	0	0	0
Aco001096	48.444	23.3789	25.0651	-1.68617	0.754158	1.08926e-07	salmon	16.5843	3.36008	1.09069	20.2462	3.37199	1.30993	44.0136	3.64404	1.527	46.7944	4.734	1.03478	24.5721	5.79796	1.12503	8.60562	1.94867	1.78388	3.86202	0.828046	1.35631	3.96572	9.78526	1.42216	1.26724	0.578373	31.5667	3.64221	2.94432	2.58656	1.27588	1.68971	1.11366	0.75233	1.07905	1.03949
Aco001601	17.1817	4.24288	12.9389	-8.69598	0.668433	8.37566e-06	salmon	95.3347	109.795	104.249	77.325	91.2648	99.6196	85.1059	66.4768	56.102	71.4667	36.759	48.8411	84.7138	55.8252	53.9362	93.7131	61.6248	51.4514	96.279	61.4535	54.1365	74.9902	84.4894	58.7333	64.2065	44.5526	87.6462	67.0319	76.5886	55.0057	44.7643	41.7465	35.7805	49.7217	51.7288	51.367
Aco005625	16.5788	7.91365	8.66517	-0.751516	0.674345	6.49983e-06	salmon	7.19825	3.39617	3.77668	9.36135	5.72231	4.42735	7.35971	3.0585	1.66686	11.6683	3.42762	3.4619	8.43333	3.26102	3.24464	6.74979	1.4778	2.50094	3.45796	1.03035	1.31819	2.05026	3.93015	1.72464	2.52486	1.94653	2.23888	2.72688	3.24346	2.10459	2.37102	2.50403	2.29053	2.05666	2.93754	2.24901
Aco014056	91.3584	28.8679	62.4905	-33.6226	0.885061	7.78424e-13	salmon	54.5416	52.2344	43.2721	45.7302	44.3865	37.5385	56.668	40.7333	32.4998	68.861	32.3443	29.1788	51.5384	33.963	27.3505	44.1983	23.03	26.43	54.6564	24.6556	17.6315	68.3013	58.6851	55.5922	36.605	40.2371	66.5167	53.8437	40.1081	44.1339	20.6568	12.7721	18.4569	34.1267	23.665	22.457
Aco013509	80.4032	27.3219	53.0813	-25.7594	0.878592	1.87523e-12	salmon	53.22	44.0454	31.2549	44.9608	38.5176	27.1517	61.0828	38.133	25.7772	98.5693	42.2676	23.1356	61.0638	34.7359	20.4627	69.706	36.2256	24.4331	52.7602	45.8837	32.9102	50.8282	54.5405	63.6959	24.0793	40.6434	58.9472	37.5619	25.1799	24.6578	21.567	20.5604	21.3716	40.4074	31.4758	28.7878
Aco002686	3.00525	1.43344	1.57181	-0.138368	0.549143	0.000523523	salmon	30.5972	16.5468	14.3751	23.3603	12.8306	15.9957	11.6631	5.98593	16.2302	44.2686	6.66244	14.8339	7.50649	2.61647	10.2441	4.07301	1.201	8.24245	6.8335	17.1533	8.13291	4.00559	23.1229	7.55514	6.76145	7.44799	25.987	47.1041	20.6209	12.1434	1.85927	2.89716	3.59557	1.44116	2.70102	1.22671
Aco008372	47.2921	19.8085	27.4836	-7.67504	0.833328	2.84307e-10	salmon	26.1233	24.9541	13.5096	23.2879	14.7853	8.0239	17.1347	13.2828	10.5511	15.5673	8.9134	6.59074	16.1944	8.81266	5.30492	17.2445	9.75275	5.72429	18.8739	18.4779	5.56341	13.01	18.2833	18.3553	7.32149	11.2881	17.4819	18.0283	8.44482	5.62627	3.03982	1.54841	1.9768	14.0746	11.5893	10.6627
Aco023245	71.296	22.7177	48.5783	-25.8605	0.88099	1.36174e-12	salmon	15.6587	13.2337	10.4625	20.276	14.2901	7.63162	16.5641	8.40086	7.48676	25.5745	8.76292	7.14142	16.8735	7.51547	8.64721	11.7073	6.28327	7.76633	16.5699	19.7353	6.93241	18.7819	20.2372	11.1528	8.9965	12.8639	20.7541	10.2285	5.68584	4.89468	3.06104	4.38693	5.81313	5.48264	5.08453	4.18663
Aco001677	25.5783	13.9285	11.6497	2.27881	0.665626	9.4291e-06	salmon	533.148	233.848	26.2165	522.116	179.871	43.1386	190.145	30.6401	6.44907	100.25	50.2174	9.59996	58.3763	39.4679	6.80063	35.9904	18.8636	4.35053	77.8971	4.11479	2.35059	14.2094	199.35	4.9999	0	2.65194	471.746	0.515669	0	0	0	0	0.073884	8.22772	4.39866	4.37123
Aco008981	38.3757	14.7751	23.6007	-8.82558	0.757084	9.10991e-08	salmon	10.9713	12.4938	6.93641	8.60995	8.20533	5.25187	11.781	7.54291	4.65893	19.395	10.3728	4.99689	12.4355	8.83519	5.10938	6.95896	5.13943	4.64112	10.1792	10.1548	8.32829	22.4434	12.1679	17.3094	2.75113	10.9079	9.69737	5.96653	3.44346	3.74356	4.28335	3.55878	3.92144	6.0247	5.36132	4.72312
Aco000392	48.6314	16.7863	31.8451	-15.0588	0.834631	2.51439e-10	salmon	39.0603	46.7754	43.7597	44.397	40.3297	45.2703	52.7548	26.9208	20.7564	57.0887	32.8119	24.2661	49.8423	33.043	22.71	39.7819	24.5962	19.0838	47.7297	19.6712	24.9471	40.1481	36.5456	42.6871	31.597	26.5274	42.821	23.2183	22.5679	32.6551	27.0463	20.2532	19.6101	23.7422	27.5669	27.7473
Aco002398	47.8325	19.1457	28.6868	-9.54108	0.850373	5.21744e-11	salmon	20.3227	12.0606	8.3574	20.0564	10.5308	7.47609	18.8543	7.30271	4.28019	19.001	6.61232	4.61726	13.8149	5.57436	3.06325	7.94841	4.41163	2.61552	16.2211	13.9091	4.54566	9.19143	14.599	7.87255	5.6178	3.55425	17.7654	13.0465	9.05233	6.96319	1.29346	0.707351	0.799797	11.0361	9.366	15.1305
Aco020593	21.0343	7.12254	13.9117	-6.78918	0.693157	2.78849e-06	salmon	50.0921	48.8172	46.258	40.2839	44.1117	40.8235	46.6172	42.2368	43.0824	57.6959	38.367	35.7867	47.0252	41.7908	33.5772	33.0727	38.326	39.4105	49.412	46.049	38.5111	50.5305	50.2697	50.4361	30.4395	50.3327	52.8923	45.0204	53.6005	49.0992	29.5796	26.6357	28.2546	43.6873	44.4596	46.3785
Aco004615	41.9014	16.3568	25.5446	-9.18779	0.795905	6.53698e-09	salmon	249.589	268.467	195.9	277.571	210.526	152.329	195.71	209.65	97.569	271.166	168.172	112.922	169.729	163.887	139.972	207.925	181.435	152.171	235.353	229.848	227.521	238.427	247.71	196.884	105.045	218.484	242.715	196.145	110.896	107.66	101.942	101.477	100.526	207.15	183.329	171.651
Aco001441	43.6878	19.1329	24.5548	-5.42194	0.830685	3.63537e-10	salmon	40.1024	38.3329	33.0252	30.0459	24.507	25.9198	32.6807	22.5336	19.0897	35.2802	25.7289	19.2011	29.9018	19.7788	21.3182	32.5136	22.8622	20.7453	27.5031	28.0256	16.0382	36.9812	39.6688	37.7085	12.3273	20.5572	36.1418	27.5234	20.5973	10.993	19.9969	21.1567	20.4864	28.6247	23.6444	23.768
Aco012449	23.1753	7.94429	15.231	-7.28675	0.734431	3.41954e-07	salmon	42.1606	42.5667	41.1906	33.2648	38.1055	39.8042	36.5575	32.6211	25.2383	44.7322	33.9591	22.4341	45.3153	38.1827	25.8138	30.2237	29.5814	29.4829	45.711	35.1499	27.8615	42.6632	37.7632	44.6962	35.5132	34.4294	41.0779	29.6651	23.7465	28.0137	36.4906	24.3586	30.2392	30.9042	27.9849	26.1019
Aco001702	24.9632	4.55117	20.4121	-15.8609	0.676175	6.00221e-06	salmon	85.8668	99.149	119.965	67.2452	88.3758	93.2731	79.5309	83.6534	69.7564	94.761	66.3577	65.7133	91.5506	85.6799	68.8399	70.3191	69.963	82.6286	96.7452	69.0867	64.7369	73.9087	101.132	82.1692	61.8224	80.9805	100.424	79.0017	52.5085	58.4066	51.3867	32.9039	29.1908	58.6288	52.3017	55.0982
Aco006642	86.1506	32.248	53.9025	-21.6545	0.862257	1.4065e-11	salmon	13.9333	13.0552	10.5761	10.2993	9.15129	7.20322	11.2413	8.66359	5.60758	15.04	7.21279	6.05237	12.8484	9.28311	6.07859	8.83938	8.05463	6.67726	13.6236	12.5027	9.49841	12.3148	14.1778	10.1346	5.16197	9.44064	15.2527	9.30978	8.33072	6.25383	5.73223	5.7567	5.76924	11.8275	9.74222	9.32308
Aco002825	18.5559	6.77159	11.7843	-5.01271	0.672552	7.02359e-06	salmon	15.3647	10.0885	12.7732	19.0211	12.8889	16.3258	28.2231	16.5822	11.5905	27.0702	12.6384	9.842	21.3797	13.1622	8.83221	16.4723	11.8571	6.4686	7.39558	2.32574	4.42442	6.73997	9.54365	22.7716	11.8079	3.58004	22.978	4.74882	6.11353	8.30095	6.68794	7.13706	6.72474	3.45865	6.2614	5.95098
Aco014984	9.14518	3.35874	5.78644	-2.42769	0.600341	0.000108542	salmon	141.631	89.2025	112.414	186.866	92.3567	112.043	76.2532	67.6717	75.0613	116.237	38.6751	100.834	61.6	15.5071	38.7632	12.3694	16.2284	24.5725	7.93661	70.0897	35.5774	68.748	93.3049	36.3205	71.1815	39.1297	173.169	104.711	55.881	70.3581	24.2719	13.1549	5.31809	14.3425	33.5682	18.9427
Aco012131	116.929	36.8016	80.1271	-43.3255	0.867605	7.48969e-12	salmon	24.5369	24.227	21.7727	20.5493	22.8705	16.1723	25.9499	17.1032	15.5929	32.4694	17.6785	12.141	26.6517	21.3726	13.4528	21.2364	15.7095	15.6274	29.6443	26.3777	15.0075	30.6754	29.8684	23.759	14.0294	23.2281	30.8908	23.9238	17.1577	15.9565	9.52414	11.5776	11.8845	23.3687	21.6323	21.6056
Aco019045	30.5382	6.21562	24.3226	-18.107	0.6928	2.83528e-06	salmon	51.8585	51.8607	36.7341	59.5631	46.4371	35.3994	50.3305	39.6006	19.9689	52.0289	41.1236	25.9982	58.774	51.8146	23.286	54.9219	53.0555	26.1101	59.1794	55.215	41.6398	65.1781	41.6124	50.5751	32.0117	31.0932	41.064	16.0646	7.75219	11.9817	24.0499	13.9488	15.721	32.4619	30.4454	31.1877
Aco011069	30.323	9.52579	20.7972	-11.2714	0.761008	7.13995e-08	salmon	38.6064	55.1499	26.2024	48.1605	50.0144	21.4282	51.1569	36.9724	24.9944	68.0872	43.837	25.158	65.8937	39.9674	18.8616	45.98	32.7492	19.0076	39.1683	38.484	11.6686	28.763	41.2492	61.363	25.426	44.8113	40.2979	45.5725	30.7179	23.5768	23.187	22.767	25.7272	22.4632	21.8582	17.1662
Aco009202	104.581	40.887	63.6938	-22.8068	0.950479	7.90049e-19	salmon	22.0279	19.5671	14.9379	25.1154	13.7765	12.78	22.0439	13.8594	8.26957	33.3082	14.5183	11.099	26.2922	14.3426	9.63669	14.7847	10.6009	11.3274	22.3177	15.6999	8.37054	15.7156	23.3217	16.8496	9.50519	15.1753	31.7702	15.0549	10.3383	8.08329	6.4628	4.43379	6.2885	13.563	10.8033	10.5878
Aco031545	16.9054	8.51741	8.38796	0.129457	0.711791	1.13048e-06	salmon	31.2572	9.86207	7.04699	36.6797	10.8108	5.33592	31.9987	25.2264	0.921355	20.1549	1.01592	0	10.2398	0	0	4.98929	1.12393	0	5.00213	0	0	2.41873	15.9133	12.3813	5.09362	0.373875	7.53701	8.69329	1.63629	0.469865	0	0	0	0	2.03161	0.438699
Aco011211	58.3357	23.065	35.2707	-12.2057	0.849531	5.70096e-11	salmon	74.0707	58.3536	35.2585	89.7415	55.0214	40.1107	60.8377	47.6419	18.0938	62.6376	31.8779	10.9897	47.3328	30.2209	12.5487	39.2492	33.8599	15.4528	73.0212	34.312	11.3053	43.151	57.6321	51.8959	47.7008	17.9037	77.9587	37.2343	40.1479	40.2553	9.02075	9.43749	8.89113	21.01	27.9569	25.5738
Aco012564	111.319	38.9577	72.3609	-33.4032	0.930222	2.29682e-16	salmon	28.4821	26.7068	18.9679	27.9079	18.489	17.2907	26.7163	15.843	9.22367	40.2323	13.9601	6.91354	33.3802	12.9404	6.79967	22.1464	8.72965	7.52064	31.144	18.237	10.7645	18.7128	32.0008	26.9883	17.2653	11.5629	34.7733	21.581	20.6201	14.3345	5.85507	5.09098	6.32385	17.3971	18.1932	16.8653
Aco002524	112.065	19.5248	92.5404	-73.0156	0.822176	7.80381e-10	salmon	68.3866	59.8541	29.191	110.865	76.2015	28.4155	155.043	37.5385	17.2866	136.314	45.7268	20.3766	126.988	33.3257	26.6786	126.411	25.0797	18.4206	102.07	10.5689	11.7424	68.1102	65.7034	24.6998	23.6789	16.9	75.0452	64.1383	16.8854	11.9679	1.85123	1.15405	1.19972	6.78407	9.07717	6.55104
Aco031490	20.2667	10.6008	9.66584	0.935008	0.572625	0.000262703	salmon	9.67766	5.8509	1.77288	15.7946	2.95335	0.733234	5.32789	0	0	0.376825	0	0	0	0	0	0	0	0	0.44317	0	0	0.207576	2.77271	0	0	0	9.54315	0	0	0	0	0	0	0	0	0
Aco016825	29.9195	10.4148	19.5048	-9.08999	0.745597	1.81241e-07	salmon	0.175637	0.173471	0.246516	0.539075	0.162314	0	1.19139	0	0	3.03939	0	0	1.49036	0	0	0.54068	0	0	0.444703	0	0	0.102892	1.98442	1.26176	0	0	0.796122	0.152535	0	0	0	0	0	0	0	0
Aco022179	64.3709	15.7482	48.6227	-32.8745	0.806251	2.94148e-09	salmon	13.205	17.2886	9.85199	14.9247	12.4027	9.79297	17.5746	9.80096	3.58601	18.177	12.4253	3.83523	18.3598	9.00595	2.39446	17.8435	14.042	5.60007	20.0303	12.8889	8.73736	15.6056	12.2836	14.4983	5.70316	6.95702	12.2903	7.94546	6.11799	6.72104	4.09932	3.55993	6.16699	8.88939	7.04525	9.12027
Aco024328	36.2921	22.7536	13.5385	9.2151	0.696246	2.41214e-06	salmon	4.64428	4.10615	4.48254	9.28435	2.44312	2.70141	23.436	1.64426	4.03628	46.7119	3.28351	5.32196	15.0426	4.97953	4.11789	12.5991	0	4.01132	7.98546	2.51197	3.37798	4.28919	4.72667	1.3803	0	5.20859	25.9188	0.560197	1.03695	0	1.07364	0.938689	1.16903	0	0	2.0598
Aco000315	25.4903	3.48768	22.0026	-18.515	0.606481	8.82456e-05	salmon	5.17391	0.722773	0.485867	11.04	1.02717	0.055635	7.92728	0.460689	0	18.9974	2.10307	0	13.9514	1.05869	0.261376	9.89259	0.659512	0.268682	2.92691	0.427251	0.875515	1.40915	2.48053	28.9773	1.16833	0.333833	3.91693	4.84683	1.05451	0.463793	0.216331	0.158948	0.364551	1.70044	1.88485	1.52717
Aco008213	27.7687	9.95422	17.8145	-7.86025	0.783111	1.65172e-08	salmon	82.6922	79.1672	62.4472	80.0628	64.4719	57.3751	61.8558	53.9269	37.5423	88.5735	54.1413	46.3715	64.7701	59.8294	42.8845	72.2858	55.0187	49.1516	61.1466	36.0108	46.2629	60.3286	59.1344	56.7226	32.1905	59.4165	74.3558	57.151	44.6119	36.6276	55.7187	51.3862	57.6215	50.4561	50.4198	44.8163
Aco015041	10.3365	3.72633	6.6102	-2.88387	0.658994	1.24131e-05	salmon	172.346	143.875	135.744	160.296	102.784	95.861	111.718	87.3266	76.4289	132.225	67.1931	61.3788	103.743	63.1113	55.6007	109.026	69.9353	58.8118	96.6922	81.6935	65.7759	84.9407	107.212	107.153	67.2063	113.867	116.027	163.897	115.119	86.9708	64.073	61.4665	69.2232	155.616	109.437	101.846
Aco013659	70.8012	27.5434	43.2578	-15.7144	0.86776	7.35112e-12	salmon	1263.57	1197.57	448.866	1087.65	602.857	275.868	705.832	360.686	123.595	864.063	436.442	61.8878	360.635	341.779	49.945	199.985	172.561	58.2132	357.94	216.495	33.3417	706.336	857.878	754.338	99.4396	310.885	995.529	226.693	42.43	45.6714	24.7706	33.963	20.8933	227.203	201.694	174.688
Aco026243	9.26011	5.58647	3.67364	1.91283	0.637717	2.87139e-05	salmon	27.6069	27.4489	15.395	44.3944	26.7245	17.7686	32.5697	26.4741	34.9921	68.9398	28.6337	28.3936	38.4876	20.1114	28.4849	24.4839	14.4456	28.0134	20.3311	11.6477	11.9663	5.90567	27.6845	11.3182	8.32798	11.7238	41.728	29.7936	19.836	12.6191	8.54569	10.9995	7.33652	13.7032	13.0849	19.2245
Aco021835	11.9361	4.11135	7.82473	-3.71338	0.651986	1.64798e-05	salmon	19.5159	21.4702	6.21824	23.9884	19.892	5.09018	15.9217	20.902	4.90834	20.8618	12.6719	2.1454	13.1394	11.6647	2.31744	7.17837	8.30632	1.39701	8.67716	2.87159	0.288778	1.18947	18.6099	9.89374	10.5709	1.8014	19.3522	33.4386	8.95474	5.8159	0.759655	0.759247	1.31075	10.4893	9.65763	5.90051
Aco024443	43.7513	8.56347	35.1879	-26.6244	0.735568	3.21008e-07	salmon	17.0746	19.2605	11.2705	16.6792	19.8186	13.0399	26.6856	21.138	14.7614	32.5299	23.411	14.962	30.3872	15.5765	11.0634	31.3138	14.3151	8.50833	21.1706	14.9498	4.67715	18.4692	24.6313	27.5146	13.1313	12.2171	16.833	23.3772	15.1121	17	3.36352	2.71617	3.26201	15.2408	18.3495	10.3593
Aco008832	2.69421	1.15381	1.5404	-0.386595	0.609903	7.84849e-05	salmon	22.9539	19.6684	16.4756	22.0367	22.1559	13.7735	16.9449	18.4231	14.4749	22.073	15.3368	16.801	17.7586	12.8946	16.8221	19.9714	16.1808	15.923	14.8293	15.4955	16.1043	17.4713	18.97	14.0652	9.53618	17.3085	22.1562	27.8463	16.4758	10.6737	11.9861	16.767	10.1862	14.0012	17.9285	16.3687
Aco009326	10.9233	5.41315	5.51012	-0.0969679	0.645825	2.1017e-05	salmon	188.601	79.5338	42.8726	121.298	47.3898	27.0613	118.52	36.3254	6.83674	99.728	8.93766	2.86597	69.6739	18.2416	2.7406	65.0209	19.2331	5.33254	40.537	31.2346	15.6562	12.2718	44.7054	27.4821	20.6224	3.72134	55.8577	179.852	79.1406	45.3788	0	0.076007	0.073568	0.984763	1.53171	2.69447
Aco000498	22.42	3.89804	18.522	-14.6239	0.68351	4.33706e-06	salmon	32.229	20.6279	29.4672	31.8157	16.6656	24.6214	42.1648	15.8903	28.1888	46.2901	10.8619	23.9884	31.827	9.75469	23.8801	35.3223	4.69551	20.8727	14.7226	9.69051	4.74374	54.7819	27.9552	19.4749	19.1072	23.3477	30.2169	32.4687	15.7901	12.976	11.3533	7.82725	11.6238	7.44503	5.97724	3.51261
Aco012377	23.4553	5.35856	18.0967	-12.7382	0.669798	7.90361e-06	salmon	40.63	44.0892	25.2041	35.9354	29.3202	19.4341	34.8159	20.0109	15.0857	38.8074	17.5283	13.0889	28.2526	27.9887	17.5169	28.664	25.4438	25.0074	34.3196	46.6276	31.439	23.295	20.1605	24.4794	15.3157	19.5574	28.8571	22.1613	13.8017	15.5603	16.7235	9.81756	8.39669	26.86	22.6535	21.5719
Aco000612	83.6415	30.3734	53.268	-22.8946	0.846674	7.66923e-11	salmon	235.673	271.118	197.907	220.244	192.66	160.053	225.616	147.611	97.8531	316.859	176.941	89.2449	208.181	160.077	81.1642	139.007	123.963	107.685	223.934	158.353	105.225	368.481	401.967	278.036	80.6731	233.578	444.611	209.935	82.6647	80.3328	63.2486	59.9489	55.3636	226.083	169.911	162.206
Aco020485	1.60679	1.21293	0.393859	0.819073	0.297919	0.0776059	salmon	0	0	0	0	0	0	0	0	0	1.15241	0	0.634675	0	0	0	0	0	0	0	0	0	0	0	0	0	0	0	0	0	0	0	0	0	0	0	0
Aco009616	49.6707	15.4818	34.1889	-18.7071	0.806538	2.87507e-09	salmon	2.62526	1.33275	0	3.62117	0.614092	0	3.5358	0	0.273679	4.96854	0.975243	0	6.28608	0	0	2.62956	0	0	0.258542	0.893457	0	0.70869	2.09717	1.60177	0	0	5.04749	0.331473	0	0	0	0	0	0	0	0
Aco018983	68.5291	26.6834	41.8457	-15.1623	0.890407	3.6145e-13	salmon	59.5305	42.8895	37.756	55.5781	41.9451	32.5777	53.361	41.7794	32.7791	62.0243	33.0649	30.1636	44.4339	30.7966	27.8498	37.1482	29.5734	21.253	39.49	28.0274	24.8029	53.9818	48.6248	52.2069	51.6653	37.1827	59.9707	44.3005	30.6792	26.022	17.1001	14.1324	14.2859	26.8422	30.5901	23.2096
Aco007364	24.8212	10.7857	14.0355	-3.24978	0.72722	5.06849e-07	salmon	3.67727	2.40194	2.71627	5.08661	2.34302	1.6943	5.94494	1.45256	1.98308	12.4672	2.30453	4.30838	7.21081	1.75204	1.48119	4.63553	0.821837	1.00686	5.56805	0.519758	0	2.6087	1.69515	0.52867	0.185169	0.560111	2.34557	2.51697	0.854166	0.523689	0.334008	0	0	1.38706	0.396598	0.390277
Aco012928	89.3293	26.1488	63.1805	-37.0317	0.843946	1.01241e-10	salmon	93.5038	69.7445	60.531	87.0994	61.8028	51.0415	85.1201	44.5373	42.7432	82.003	37.6204	44.4752	70.12	34.3924	49.1644	63.7827	42.1639	48.1076	77.9206	76.4654	50.7046	96.2684	91.662	61.0192	38.2118	69.0361	93.926	74.1778	54.7814	43.8703	32.6138	38.2392	38.776	69.1583	62.614	64.9393
Aco005467	39.1837	25.2017	13.982	11.2197	0.707132	1.426e-06	salmon	10.9384	0.72217	0.391792	16.9415	0.326435	0.139614	50.9245	0.629118	0	95.6031	0.467897	0.206949	24.4188	0.372848	0.054702	18.9809	0.06309	0	8.01304	0.078916	0	10.6664	4.59528	0.066525	0.21962	0	44.9549	2.35978	0.19563	0.249089	0	0	0	0	0.065037	0.28937
Aco014878	77.5096	17.8703	59.6393	-41.769	0.823165	7.15594e-10	salmon	22.6478	23.435	14.468	17.1017	16.3275	12.2813	29.486	15.611	11.597	37.2853	19.4961	9.86049	33.8535	23.115	11.3475	22.7872	12.4699	15.8981	26.9481	19.7135	16.998	21.392	29.6236	25.8381	12.2254	20.2146	37.7829	20.5399	20.0377	14.9958	10.1602	9.97438	8.4427	25.0241	22.0048	21.1027
Aco005460	54.4605	13.8394	40.6211	-26.7817	0.808244	2.50835e-09	salmon	50.2845	20.1543	41.0741	55.0607	20.4103	38.7343	67.4377	17.3435	25.4906	67.2604	32.6127	37.4972	48.1568	26.063	33.4029	47.3289	14.2712	23.1748	27.8717	4.94629	9.54938	38.0911	51.6079	41.3635	18.5392	33.593	72.0755	17.9699	8.72821	12.616	7.34843	1.83641	4.76368	4.72802	9.37744	5.63341
Aco004358	26.0324	12.7572	13.2752	-0.518023	0.753988	1.10053e-07	salmon	207.386	76.1661	20.7237	203.683	118.28	37.0262	290.447	77.1571	29.9039	234.469	87.7253	18.7121	231.774	98.4028	15.9059	50.9086	53.6087	8.85283	9.68424	14.5067	1.16287	24.5078	50.3555	7.84363	8.40477	1.83454	241.452	10.8346	7.63793	3.28558	1.46296	0.233287	0.079887	0	0.263466	0.118067
Aco021968	11.2777	5.80177	5.47589	0.325883	0.675522	6.17564e-06	salmon	4.61384	0.710725	2.35856	5.67772	2.43147	1.20833	7.74319	1.09094	0	6.75805	0	0.575139	2.47431	0.200943	0.177993	3.93717	0	0	0.290693	0.368458	0	0.896904	0	0	0	0.603846	3.88421	0.35141	0	0.73102	0.398415	0	1.68282	2.28113	1.37024	2.06133
Aco029105	81.7674	19.6388	62.1286	-42.4899	0.810145	2.15101e-09	salmon	18.0403	7.05045	4.67184	19.5475	7.44255	4.06116	8.76701	5.2874	1.61422	9.25539	0.86735	0.28106	5.86036	1.65925	0.545493	7.31534	0.598192	0.647264	14.4595	2.43451	0.575397	10.5567	19.4771	3.06272	0.889468	0.279497	19.4179	0.590178	0.720622	0.259618	0.220219	0.620166	0.786101	3.09428	2.06266	3.23793
Aco005595	30.141	13.4064	16.7347	-3.32831	0.80648	2.88834e-09	salmon	55.4061	38.1149	40.7178	52.4728	34.7911	40.798	42.622	22.1686	17.086	79.6234	17.3552	13.8472	51.7603	21.1051	9.66386	33.5906	16.7916	7.96557	27.817	17.4422	13.7222	21.0679	52.2264	17.6174	12.1972	8.61134	48.0782	35.44	38.82	40.9729	11.8644	9.70225	11.057	11.8867	15.4013	14.9872
Aco002748	112.718	50.0378	62.6805	-12.6428	0.95158	5.43702e-19	salmon	56.2193	62.4928	50.8071	48.2751	49.9385	39.7408	55.6645	38.4733	25.9003	77.6532	39.1403	29.0874	60.5761	44.2799	25.8666	48.3076	33.5068	27.6839	54.808	39.8735	26.0147	55.441	63.5383	54.3577	29.525	51.1641	70.2428	38.8971	32.3154	30.7766	25.9255	20.6699	23.0414	33.9492	36.4825	32.1542
Aco014139	30.0734	8.62294	21.4504	-12.8275	0.761203	7.05296e-08	salmon	109.434	94.7545	53.8274	104.857	83.949	42.0813	112.568	46.1421	17.7069	177.635	36.742	13.6078	106.022	48.6164	22.3776	104.912	48.6258	22.6971	71.7898	130.591	105.145	172.462	88.9002	70.0306	65.674	22.7403	87.22	57.2403	22.7507	35.4908	23.2295	30.6598	13.0292	54.6989	62.5726	60.6891
Aco001669	98.0519	29.3356	68.7162	-39.3806	0.892177	2.77964e-13	salmon	88.4838	82.462	57.0229	97.8328	83.7477	58.6005	109.12	64.3844	27.0877	100.048	49.6971	25.5427	94.1065	53.1757	21.0803	74.6811	46.531	15.8881	73.7584	41.1932	16.5724	55.0487	111.274	52.7477	46.1888	13.5296	119.539	40.0751	23.1509	36.4451	13.5277	12.2063	15.4541	47.0709	57.4776	46.2258
Aco009866	27.5771	9.23685	18.3403	-9.10343	0.769373	4.18119e-08	salmon	4.46173	6.36476	3.6265	4.02079	2.70284	3.56814	5.17732	7.28798	1.78758	8.50152	3.96316	1.15131	6.67077	1.85689	0.387312	4.2294	1.84837	0.878404	10.3712	2.22326	1.06849	3.61416	3.51974	7.51683	0	1.60445	4.39814	2.39007	0.585574	1.85415	0	0.555071	0	1.19158	1.75136	1.29226
Aco002650	46.5956	17.1365	29.459	-12.3225	0.837869	1.8446e-10	salmon	18.8154	10.8467	9.17741	13.0014	6.639	10.4448	12.425	4.77173	6.51714	16.4696	4.82791	8.36186	9.56048	5.04983	4.94506	11.2242	7.4886	4.54334	7.57498	6.75611	1.92408	5.11242	15.7374	6.32425	2.52661	4.73629	20.3733	5.87624	2.74949	2.13465	1.35646	1.17031	1.67656	2.77202	1.93437	2.78693
Aco001438	29.5421	11.053	18.4891	-7.43618	0.746873	1.68207e-07	salmon	166.038	98.7322	72.0379	233.476	113.43	71.0493	235.46	77.9492	30.9332	302.219	146.69	38.2448	151.853	86.9587	15.6045	162.7	72.4097	14.2134	119.905	54.9305	6.33112	26.8636	126.718	184.286	162.282	50.8653	90.0407	230.242	41.1713	79.4446	6.33626	2.9534	2.3133	36.1542	53.6299	29.4429
Aco000039	41.1263	20.532	20.5943	-0.0622835	0.771659	3.59833e-08	salmon	40.6581	36.2664	27.3644	31.7643	26.3186	23.4057	28.5434	24.8911	21.4682	45.1143	21.1181	20.314	29.8737	22.1314	20.3118	23.6783	19.8831	19.7265	33.9671	28.7582	20.677	41.7176	42.2854	49.327	21.9633	34.6883	40.3239	34.5867	27.1024	21.7025	17.9763	17.9852	20.6157	38.0812	36.8271	32.7149
Aco031578	3.49575	2.00942	1.48634	0.52308	0.576536	0.000233013	salmon	1.41972	1.45165	0.961813	0	0	0	0.748076	0	0	5.21224	0	0	1.16544	0.786177	0	0	0	0	0.951938	0	0	2.10996	0.374467	0.573966	0	0	0.534829	2.43586	0	0.411079	1.2824	0	0	0.935902	0	0
Aco002618	35.0055	3.87539	31.1302	-27.2548	0.618822	5.74489e-05	salmon	39.0419	41.9337	27.2594	32.9569	33.1576	26.074	29.0428	27.648	22.9815	42.1803	24.6112	14.608	37.4036	29.6798	16.1843	30.9437	26.3786	23.7888	31.9336	47.1801	31.541	26.3759	25.2772	36.7071	22.8438	25.708	33.1694	40.8811	35.8523	26.3272	7.91279	8.06166	8.28472	36.633	34.7093	33.0392
Aco030583	6.32245	0.991569	5.33088	-4.33931	0.533911	0.000797463	salmon	12.2756	12.7017	18.8909	10.9045	13.053	18.1691	12.7059	11.2324	12.8141	19.2394	9.39667	13.4211	17.751	12.4714	12.364	8.03066	8.55277	13.323	8.79026	13.0911	11.0012	7.26978	16.6688	13.0329	10.4129	8.70859	19.576	10.3167	9.57084	13.2777	5.06425	5.33844	4.54736	5.05218	9.39053	6.37368
Aco026341	47.2746	21.2451	26.0295	-4.78436	0.8192	1.00976e-09	salmon	441.057	173.388	92.6388	546.619	213.931	105.902	414.006	138.209	47.6353	433.717	127.298	47.9627	302.872	98.9477	68.0712	260.807	63.748	52.3368	242.321	46.5671	19.8479	135.611	220.678	234.1	121.849	20.2308	263.276	279.397	121.99	68.7841	95.002	63.311	84.3623	2.06477	5.89889	3.24443
Aco019476	43.4857	6.95518	36.5305	-29.5753	0.726021	5.40476e-07	salmon	53.9957	44.9604	35.6995	50.0024	49.4136	39.122	55.5476	49.5072	27.9614	50.1627	40.5438	27.7683	55.786	44.7172	28.6113	57.9395	46.9056	32.5717	65.6998	69.4323	30.8115	44.3317	51.9471	44.4169	33.337	38.5182	50.5445	36.3019	24.5037	22.4971	20.0071	14.8826	17.6994	23.5534	24.0668	19.8907
Aco027110	12.6706	4.47836	8.19222	-3.71387	0.678527	5.41352e-06	salmon	31.1269	29.528	22.6941	32.0644	27.3694	24.8806	26.002	23.0923	22.3703	57.0062	29.9632	22.0507	30.8646	23.0277	24.8817	32.0489	28.7724	25.4489	33.6324	37.1111	36.1739	31.7003	30.4913	32.6732	19.0466	30.3409	32.8554	16.8758	12.6614	15.3438	23.389	14.5358	15.8534	25.3485	23.0919	23.8981
Aco018550	17.688	5.958	11.73	-5.772	0.685507	3.96348e-06	salmon	3.97165	1.48016	0.655754	2.43143	1.2453	0.696732	2.70533	0.45637	0.102454	0.86925	0.282108	0.037909	1.74137	0.382397	0.141704	2.43603	0.156523	0.184663	1.43353	0.561107	0.208975	2.84554	1.42647	0.689638	0.050624	0.238931	0.518362	0.330008	0.429058	0.618088	0.332667	0.200581	0	0.746143	0.446635	0.654609
Aco006589	28.4298	12.7954	15.6344	-2.83905	0.709736	1.25308e-06	salmon	115.571	96.8593	88.0775	92.8575	67.0392	71.5469	89.1166	75.762	91.1468	120.161	62.0704	77.5653	79.1272	62.7797	74.07	65.8424	66.3515	70.4996	79.4956	88.7242	84.584	115.088	102.273	97.2863	55.3448	105.963	111.718	103.901	64.3456	53.413	53.0906	39.2107	42.3563	108.862	85.1228	96.069
Aco002382	24.8478	6.09143	18.7564	-12.6649	0.661312	1.12843e-05	salmon	57.8251	50.3771	59.9611	75.9221	59.9844	71.6744	76.0425	80.768	54.1889	72.8334	58.3843	40.1071	67.9972	49.8483	28.7247	56.4198	33.7507	15.9636	45.3962	12.2621	3.57857	15.2295	76.5736	30.3318	48.8564	4.81443	142.775	38.1319	17.3134	17.7794	10.6554	6.04647	5.41696	4.10261	5.82859	2.18304
Aco028927	136.515	49.2205	87.2944	-38.0739	0.948742	1.40034e-18	salmon	49.0163	42.2989	20.1631	46.5549	22.5375	14.7074	47.9054	16.6175	8.21792	49.2676	16.3287	8.46808	30.7525	16.5568	8.47905	27.002	14.2912	8.58388	39.6106	18.7851	9.23528	39.5258	53.6861	26.4563	7.03535	13.4965	43.4289	21.3125	11.0109	9.79795	5.2463	5.74676	5.8537	18.2948	15.3762	13.9141
Aco009811	49.6959	23.6407	26.0551	-2.41439	0.813125	1.68459e-09	salmon	45.4488	41.2398	34.8108	35.9535	33.3645	30.178	32.6547	32.4469	27.1032	50.2915	25.3402	23.1841	34.6412	25.59	23.2897	23.5288	25.1486	26.3783	29.0262	36.2434	29.3291	49.9712	36.0524	39.5184	24.7484	39.6358	43.0229	41.8275	26.6635	15.8281	14.1219	13.0525	14.4178	33.9903	30.1918	27.4785
Aco006264	84.9993	20.1503	64.849	-44.6988	0.771979	3.52303e-08	salmon	51.3825	49.9585	41.5832	42.8801	41.3041	37.6356	43.1038	38.3326	31.6575	62.3036	37.1774	33.9886	61.6575	44.3071	32.6828	48.965	37.4975	39.6514	63.5469	49.767	43.5215	71.2785	57.1059	53.8919	29.9162	51.1724	59.6337	62.6736	38.5264	32.6308	26.04	27.0738	30.9355	47.387	41.4739	46.9623
Aco008712	13.2679	6.893	6.37493	0.518073	0.550661	0.000501463	salmon	53.5855	51.8877	0.737041	63.3296	15.9703	1.52263	1.68835	0.912329	1.00748	2.26941	0.399188	0.078352	0.16715	0.082624	0	0	0.106864	0	0	0.091376	0	0	24.1083	0	0	0	66.9489	0	0	0.201677	0	0	0	0.19873	0.096758	0.064694
Aco008598	14.6848	4.19027	10.4946	-6.3043	0.612622	7.14337e-05	salmon	125.314	102.416	135.419	144.773	111.205	139.08	176.858	66.9716	28.0846	174.484	51.9298	44.1284	143.35	52.6939	29.7244	81.8723	35.9549	19.4654	43.7141	21.9289	13.8087	47.727	68.5581	60.6534	120.896	23.9633	92.037	184.728	57.0768	146.856	22.4253	10.2834	13.8761	21.7842	33.296	37.0407
Aco020915	1.65163	0.33605	1.31558	-0.979532	0.322451	0.0551098	salmon	0	0.69395	0.214973	0.933829	0.813354	0.177325	1.65062	0.15976	0.122442	5.84081	2.87506	0.130085	4.76763	1.27075	0.396126	0.26143	0.08993	0	0	0	0.085541	0	0	5.66448	4.63459	0.156455	3.81368	0.663437	0	0	2.64875	2.29867	1.68469	0.091589	0	0
Aco000207	56.9826	24.5932	32.3895	-7.79628	0.871848	4.45416e-12	salmon	64.377	62.6124	35.7411	66.0602	59.429	30.8423	75.4708	44.1383	16.7487	119.494	49.3676	18.4759	86.3732	52.6506	17.3199	44.8362	40.8996	24.0862	58.6079	48.7461	34.3159	60.5064	45.446	87.9682	26.5658	57.5398	66.4109	59.8769	39.7209	27.3773	17.4337	21.878	21.0007	27.0095	27.4689	24.3153
Aco014973	27.8009	3.75757	24.0433	-20.2858	0.654084	1.51507e-05	salmon	24.9252	23.9177	21.9561	26.5652	23.2223	20.5577	24.9042	18.2405	18.5786	27.9487	26.3351	21.6259	24.0578	21.4754	17.0516	22.894	16.9888	16.0628	20.8263	9.27457	13.8636	28.5688	26.3066	24.7813	26.0817	19.4065	22.5324	27.7698	21.6243	23.3625	13.5223	15.0994	16.3719	14.0299	17.6464	17.7834
Aco012055	23.038	10.6363	12.4017	-1.76547	0.734166	3.46999e-07	salmon	12.2474	2.78292	0.474725	28.5391	3.17878	0	15.4213	0	0	28.2099	0	0	8.39169	0.487235	0	15.8987	0	0	10.3535	0	0	0.379534	1.44274	0	0	0	10.7372	1.39588	0	0	0	0	0	0.280533	0	0
Aco015473	151.271	19.7278	131.543	-111.816	0.839693	1.54464e-10	salmon	141.883	111.114	97.374	126.694	87.6579	82.8039	145.724	72.699	72.2326	122.283	74.8477	78.7982	117.587	67.0113	71.2785	147.601	69.5341	71.9856	126.112	74.8593	72.4603	140.308	143.135	109.977	45.5768	102.253	156.767	127.587	86.3872	62.3205	69.5541	77.2266	80.7128	93.1467	94.2326	90.1645
Aco018828	21.8754	11.5983	10.277	1.32133	0.75746	8.90106e-08	salmon	24.7747	22.2493	19.7265	21.4839	16.8226	16.6273	20.6206	18.798	21.4187	31.5727	15.0318	17.3399	20.4508	15.1456	16.9303	17.9025	15.2187	13.2805	18.9292	20.8918	15.5054	23.8109	23.6634	25.319	12.0533	25.3746	23.3853	18.8863	18.3377	15.1664	10.5618	9.82027	13.9944	17.0491	25.193	22.6166
Aco028034	67.4162	15.4097	52.0064	-36.5967	0.757375	8.94813e-08	salmon	30.5989	33.2291	33.2993	29.3266	26.5749	28.8591	31.0342	27.1912	22.6664	38.0372	21.1148	21.2543	32.4809	24.037	21.0473	25.4093	22.3342	21.6945	42.8145	27.4442	21.8871	39.7431	36.0963	29.5898	18.523	25.6571	35.2108	33.9527	28.262	24.678	20.7589	20.5558	20.3256	32.8246	32.7841	32.4286
Aco011457	9.23453	3.63971	5.59482	-1.95511	0.653581	1.546e-05	salmon	20.762	15.5658	21.8495	22.3344	18.848	23.677	29.6024	19.6542	15.7845	27.9621	17.973	14.861	23.7658	24.3664	13.1809	15.5504	21.6076	15.1694	24.319	27.1662	21.6751	24.6958	30.7876	32.5084	12.6258	30.3236	29.3536	21.5968	18.0344	17.8711	14.9832	13.2875	17.3168	21.8136	21.0376	14.2796
Aco008899	79.6499	35.3596	44.2903	-8.9307	0.881131	1.33618e-12	salmon	139.985	125.098	123.763	106.873	97.5229	103.82	105.042	94.0682	78.4689	136.708	73.1929	77.5934	114.727	90.3929	73.2975	74.5663	68.7617	75.9414	112.815	96.8866	74.9574	129.556	131.708	130.029	78.6373	111.982	141.907	114.288	77.2962	65.4532	38.5829	37.1529	37.8402	88.3199	79.7988	71.8646
Aco006570	34.1729	11.2292	22.9437	-11.7146	0.726714	5.2081e-07	salmon	48.7728	54.1435	60.5019	40.0948	39.3626	49.8023	37.1526	33.9648	26.8572	48.6008	31.3614	28.8229	44.7738	35.0843	27.15	29.6452	30.6524	27.6903	47.4297	34.2019	28.5226	61.2874	45.0028	46.015	32.5272	42.8894	47.8758	28.5218	19.5312	29.5347	28.3832	19.636	23.6429	39.2589	30.738	30.1923
Aco006024	22.5211	10.4826	12.0385	-1.55592	0.633797	3.32821e-05	salmon	63.3951	31.041	21.1086	63.8097	9.87407	11.3534	38.8429	3.39523	0	1.01602	0.348432	0.151266	0	0.344156	0	0	0.41618	0.456765	16.1398	0.208756	0	2.29646	60.6719	0	0	0	50.1823	0.265557	0	0.193905	0	0	0	0	0	0
Aco011085	34.1117	22.0236	12.0881	9.93553	0.677779	5.59486e-06	salmon	4.54943	4.19964	5.91939	9.73137	2.78917	3.00007	24.2816	1.75718	5.37369	47.5668	4.28954	5.89656	16.8256	6.85195	4.65912	13.0543	3.25226	5.42965	7.86274	2.96845	4.45635	4.97417	5.41006	1.89102	3.10134	5.51128	26.2152	0.578321	1.03771	0.641255	1.56138	1.44764	1.6304	1.84697	2.91345	2.44307
Aco000452	39.0442	23.2731	15.7711	7.50205	0.731389	4.04324e-07	salmon	0.850054	0.304348	0	1.14801	0	0	2.48346	0	0	3.27347	0.097829	0	1.25848	0	0	0.479092	0	0	0	0	0	0	0.200313	0	0	0	2.32939	0	0	0	0	0	0	0	0	0
Aco000909	20.1264	8.8996	11.2268	-2.32722	0.740042	2.49547e-07	salmon	17.4754	15.9332	5.2084	16.1252	7.46929	3.76361	6.85584	3.31552	0.976541	9.48108	0.665031	0	5.37361	1.4982	3.76839	4.66705	0.761275	1.10552	10.2339	0.40207	0.342274	10.4972	7.87583	1.84363	0.677879	0.318385	10.5555	9.03404	7.86501	4.30529	0	0.125128	0.216298	3.9549	7.29817	5.31599
Aco011197	7.32729	2.09976	5.22753	-3.12777	0.621156	5.28607e-05	salmon	6.02578	3.09558	2.9609	11.4573	3.64093	3.04252	4.9352	5.56767	2.53063	7.50449	1.99832	0.813701	3.69802	2.31691	0.953035	1.72694	4.23252	1.5391	0.690083	12.665	0.780236	2.04668	9.45709	5.56301	2.96326	1.0892	13.445	0.205078	1.34622	2.23297	0.185022	0.117979	0	0.333036	0.627726	0
Aco005142	44.5901	17.2093	27.3808	-10.1715	0.825033	6.06574e-10	salmon	133.023	100.962	70.019	200.697	112.13	83.8604	180.747	99.6477	48.803	262.175	48.72	34.4654	169.456	50.8392	40.0223	117.01	35.8232	29.5141	108.858	167.917	27.9664	66.7364	124.307	102.979	112.084	29.391	193.262	156.696	77.5392	94.8484	9.85622	2.87595	2.10939	13.8057	24.3083	18.9887
Aco019254	9.14552	3.4159	5.72961	-2.31371	0.633214	3.4016e-05	salmon	236.104	171.599	163.601	249.353	166.737	161.419	291.404	164.343	159.673	256.995	165.939	158.022	211.565	157.81	162.163	177.773	191.387	176.422	188.092	186.344	218.518	234.5	258.015	346.503	125.908	329.507	283.431	242.723	208.749	151.657	130.902	138.258	123.217	227.431	215.238	228.031
Aco009985	6.3857	4.68347	1.70223	2.98124	0.425912	0.00959916	salmon	0	0	0.093307	0	0	0	0	0	0	1.34591	0	0	0	0	0	0	0	0	0.124383	0	0	0	0	0	0	0	0	0	0	0	0	0.047002	0	0	0	0
Aco006194	98.5966	20.0259	78.5707	-58.5447	0.849566	5.6797e-11	salmon	72.115	63.7786	56.0977	62.9248	54.2106	44.1304	68.2661	44.6246	32.5751	80.2517	41.2143	28.617	67.5911	46.9468	27.9773	88.445	40.9684	29.3863	77.6336	61.6166	44.7874	56.6964	67.4419	47.225	14.114	41.5975	82.4764	38.0558	28.973	22.0003	22.8222	32.137	31.2841	43.0404	46.6398	50.508
Aco007573	7.99352	2.27402	5.71951	-3.44549	0.497568	0.00201744	salmon	0.817132	0	0	0.306017	0	0	0.419488	0	0	0	0	0	0	0	0	0	0	0	0	0	0	0	0	0	0	0	1.06513	0	0	0	0	0	0	0	0	0
Aco031671	8.87763	4.82991	4.04772	0.782195	0.4849	0.00272422	salmon	0.906695	0.419137	0	2.97559	0	0	0	0	0	0.180379	0	0	0	0	0	0	0	0	0	0	0	0	1.08339	0	0	0	1.26668	0	0	0	0	0	0	0	0	0
Aco005352	57.1064	21.9127	35.1937	-13.281	0.845156	8.95665e-11	salmon	135.511	154.572	120.439	125.375	129.698	100.915	137.904	91.371	72.1027	154.686	120.278	93.4997	137.627	116.925	77.821	117.167	98.8278	96.111	131.706	68.7657	81.4156	166.483	144.338	141.008	57.4896	134.214	146.024	137.831	84.3208	75.8636	72.2817	70.5319	62.0204	74.7408	76.2488	61.2742
Aco000805	38.4127	17.0956	21.3171	-4.22147	0.81736	1.18146e-09	salmon	123.692	92.4212	68.8862	124.369	93.7903	52.4928	103.927	87.1542	43.295	106.516	21.5711	9.63231	59.7661	16.7188	6.90699	36.083	7.24776	6.70207	45.9204	20.2005	1.63467	35.218	113.695	49.2356	28.0151	44.7621	174.98	128.256	29.5271	17.4715	0	0	0	6.8734	16.5241	7.9853
Aco006101	42.1812	15.8628	26.3184	-10.4556	0.802167	4.05399e-09	salmon	17.4284	16.6574	7.7421	22.6436	13.8679	8.76927	16.7607	5.04799	0.976774	16.6392	6.25299	2.01724	13.3371	6.50977	1.7789	7.97182	3.99235	0.252219	20.501	1.75888	0.239472	5.38577	13.7968	1.60186	2.87769	0.791589	10.8675	1.40323	1.48824	3.77848	2.28175	0.78344	1.08732	3.59471	4.75253	4.51006
Aco020925	24.2576	10.1532	14.1044	-3.95122	0.724421	5.88554e-07	salmon	34.1524	31.0274	24.2705	25.4232	16.723	15.7738	26.9929	16.1975	19.823	41.1633	15.8948	18.8624	29.7627	14.5902	17.0945	27.9711	13.7248	21.4306	23.53	30.6001	26.6363	35.2582	26.0342	27.4668	11.3925	35.8075	23.0318	15.308	11.2498	10.506	10.4333	11.6937	13.8932	22.6564	19.0935	21.9618
Aco004773	62.7368	9.97674	52.76	-42.7833	0.717892	8.28356e-07	salmon	321.122	222.763	240.081	365.402	291.043	263.037	432.566	236.168	249.799	460.832	237.319	253.68	408.928	172.328	193.544	477.129	136.231	139.371	362.163	93.527	116.413	148.008	366.464	276.432	308.104	147.806	401.332	458.279	328.405	237.206	54.1194	80.048	67.4181	136.631	177.12	151.084
Aco007749	46.38	12.2076	34.1724	-21.9648	0.699168	2.09946e-06	salmon	50.0616	52.4061	44.484	45.9663	45.4932	40.7568	47.2845	37.4266	29.4059	65.854	40.4046	32.6209	60.8801	49.4585	31.8974	47.2213	40.9919	41.8662	66.8986	55.0628	43.8116	66.5026	58.5916	62.925	33.5442	58.0257	56.2251	46.2729	30.252	38.5462	45.4298	38.4114	41.4157	55.0331	48.7313	46.127
Aco006814	65.1916	18.6779	46.5137	-27.8357	0.763487	6.10656e-08	salmon	25.4699	26.7299	25.1589	20.6329	25.1854	20.0579	22.7502	17.5258	18.8185	31.4992	18.0337	14.9864	27.2	19.6488	14.3992	22.5318	19.5581	14.8242	31.5253	31.3879	18.1455	39.4389	24.8082	24.7804	15.8598	22.8263	27.7697	21.5056	14.7508	17.0936	10.5089	10.159	10.7796	24.2302	20.6532	21.0363
Aco017637	27.7338	13.643	14.0908	-0.447821	0.746193	1.75045e-07	salmon	65.7805	26.8699	5.3993	80.6957	25.1143	5.63929	37.2743	8.02021	0.561179	25.5277	4.67321	0.741256	14.445	8.00707	1.37716	7.60659	2.59421	3.78583	42.9263	1.76204	0.4827	10.4871	18.7705	16.5348	3.87069	1.55426	75.9836	0.645473	0	0.164275	0.453657	0.285701	0.219968	0	0	0
Aco008455	118.944	36.5358	82.4078	-45.8721	0.914003	7.06249e-15	salmon	33.1399	30.7453	25.3438	27.3326	29.3206	24.8602	37.669	20.4933	8.04513	40.3027	16.516	4.75538	36.1959	18.3621	4.30671	24.1067	8.68028	4.52269	40.5275	4.60405	1.67274	23.7024	44.8323	31.4263	10.0476	5.9019	39.0062	18.4607	9.47162	9.09676	2.82935	4.12317	4.8202	11.1712	14.0174	8.15966
Aco003619	60.2004	18.4407	41.7597	-23.319	0.798902	5.2116e-09	salmon	12.3038	12.2116	11.1095	8.21142	9.93768	10.7966	11.8722	12.5495	7.73755	19.8219	11.4114	7.87427	15.7452	12.4332	7.80895	11.6411	9.23664	7.96657	15.9564	8.91892	8.00193	19.7768	15.0612	16.7773	6.70653	9.83681	16.7779	14.0326	9.46069	8.63114	6.55611	7.00253	7.89663	8.97095	9.24794	9.479
Aco006977	125.676	29.2719	96.4044	-67.1324	0.872806	3.95078e-12	salmon	41.223	36.2365	37.9139	34.8564	34.6428	36.3075	44.9408	32.8348	26.6662	53.1905	25.6049	23.879	46.846	36.2113	23.0469	34.7472	29.8959	25.8908	41.0119	30.438	29.3067	56.3006	50.737	39.1838	27.8871	32.7317	54.2958	33.9766	30.734	29.3561	27.4297	22.7484	24.3823	32.6668	36.3777	32.8776
Aco003517	25.6338	6.78856	18.8452	-12.0566	0.737103	2.94605e-07	salmon	26.8383	22.1861	20.2079	30.6811	18.334	17.3695	25.8038	12.2648	9.63589	28.2047	12.9343	10.8666	22.9319	12.4065	10.2508	28.45	8.62614	10.5785	26.124	23.9172	14.9923	21.0486	20.371	22.8928	6.502	12.2713	19.149	15.5129	10.092	7.70515	16.8373	18.0251	20.0274	12.4379	11.2862	10.5758
Aco007601	28.7647	4.15171	24.613	-20.4613	0.595048	0.000129306	salmon	10.7851	13.081	8.66747	10.1915	9.99932	7.42035	9.93825	7.57041	7.31405	11.346	7.85279	5.2227	10.0959	10.8271	5.89435	10.01	10.5635	7.31433	11.3369	14.1299	10.9131	9.45239	10.0263	10.8129	4.96966	8.45678	8.994	6.49528	7.54117	7.62438	5.71432	5.98819	5.59911	9.68753	8.93184	9.69665
Aco005261	172.898	30.6901	142.208	-111.518	0.880666	1.4226e-12	salmon	200.569	154.832	77.3616	213.587	124.298	66.8048	195.79	42.2593	25.1821	168.95	33.5129	17.7026	156.813	27.817	14.8912	248.846	23.3381	11.7754	224.179	24.5928	4.02325	209.578	204.106	115.701	49.7787	32.5385	190.42	67.8385	30.8263	21.3789	2.40192	2.74787	1.69126	34.5561	47.681	35.9809
Aco008130	46.1086	13.0073	33.1013	-20.094	0.733038	3.69315e-07	salmon	15.4551	8.09562	7.85414	22.78	8.44328	9.21243	18.6435	2.1635	1.88809	9.22385	2.14834	2.82508	6.12205	1.47748	1.74719	5.94686	1.91648	1.17057	3.93789	0.689134	2.36518	2.67175	18.5121	2.60181	0.774938	2.07624	28.7831	0.863847	0	0.29548	1.31733	0.936524	0.719789	0.296918	1.15242	1.14762
Aco027086	81.4094	8.40517	73.0043	-64.5991	0.685307	3.99957e-06	salmon	17.4476	12.8524	3.72197	25.0775	14.0892	6.79034	54.1154	9.32296	4.63534	43.1319	21.1339	7.49553	40.4756	13.9415	5.35122	31.9358	4.99118	4.91194	31.9166	1.52752	0.486876	7.62744	36.2447	18.0566	21.4924	2.61206	29.4956	27.4124	31.2178	26.0488	0.356106	0	0	0.774215	2.14309	0.697849
Aco002559	71.1624	36.0388	35.1236	0.915231	0.900514	7.55954e-14	salmon	148.834	105.709	59.9408	131.23	66.9681	38.7656	92.4319	55.1333	26.7802	132.26	32.9005	23.3262	70.3703	42.3031	22.3996	50.9043	41.1382	25.9868	72.5184	51.1622	31.901	109.545	121.593	87.8781	30.3853	64.3754	151.714	37.2149	16.5181	12.402	9.15281	17.6252	16.6696	90.2058	74.7929	59.8127
Aco014512	117.981	47.2987	70.6819	-23.3833	0.928135	3.72944e-16	salmon	35.6986	39.5096	28.4573	30.4958	29.1024	24.1145	31.5826	22.2376	18.2112	45.7491	26.6948	16.292	38.9089	25.9001	13.9106	29.6257	19.927	16.7915	40.3158	24.0559	17.6463	40.3841	43.4889	40.0733	17.7308	30.0368	44.3711	26.3543	16.5336	15.4978	14.0872	14.4401	15.4693	20.8541	17.5115	16.7203
Aco001742	49.9299	10.7495	39.1804	-28.4309	0.723584	6.15243e-07	salmon	39.5525	34.632	34.8382	29.285	31.0474	31.0209	37.0566	30.2688	35.7012	50.015	32.886	34.116	41.3553	24.6894	29.9072	37.143	25.3841	27.9341	40.9818	30.8991	22.1885	60.5312	45.8455	48.1175	31.8436	41.6613	53.2471	48.9477	38.2709	26.8512	21.2631	22.8339	22.0418	32.5336	32.7678	27.1579
Aco011204	28.3443	7.05987	21.2844	-14.2246	0.688154	3.51358e-06	salmon	23.9345	20.4349	22.8631	26.4065	25.0791	22.668	24.0462	16.9861	15.8409	23.225	14.7666	17.8835	28.0935	13.2488	13.9705	27.7738	11.5053	9.96032	19.1288	9.58151	7.38896	11.3986	20.4736	13.4781	16.7396	12.4854	26.99	15.5895	9.09175	21.4155	10.5201	6.3708	10.6396	8.83392	7.53772	7.72468
Aco008860	8.6381	2.95191	5.68619	-2.73428	0.438801	0.00742435	salmon	4.3755	1.22634	0.653591	10.6703	1.91246	0.554659	0	2.90427	0.515757	0	0.066437	0	0	0	0	0	0.625768	0.13208	0	0	0	0.166642	0.459397	0	0	0	14.7707	0	0	0	0	0.075008	0	0.305874	0	0.077947
Aco015573	38.8398	16.6756	22.1642	-5.48853	0.795241	6.87023e-09	salmon	30.077	8.81774	8.20321	32.5281	8.78889	8.45064	14.2963	4.63941	1.06075	11.2244	2.20382	1.23306	12.8796	2.71431	1.83701	10.5411	0.763648	1.54489	18.7704	0.791022	1.3445	20.4843	13.9171	13.0029	3.00367	1.82773	12.8691	5.46747	2.10248	1.88226	0.215038	0.819604	0.685863	0.852115	1.08085	1.51635
Aco011742	61.4607	15.9723	45.4884	-29.516	0.73088	4.15727e-07	salmon	29.8698	28.6085	28.1315	22.1762	23.4699	24.6026	32.2498	24.5845	25.0547	35.1871	15.1415	20.5562	36.4484	18.7689	21.9225	20.3175	13.9975	24.5925	33.027	30.437	16.5904	48.0849	33.5566	29.5714	15.4343	30.3827	38.459	25.4265	19.3774	16.2584	8.74942	14.7808	13.7088	30.5247	32.5694	24.6941
Aco028152	54.9426	17.8377	37.1049	-19.2671	0.833876	2.70015e-10	salmon	20.024	22.9799	13.4192	20.2392	21.9541	14.7733	25.179	11.7942	8.76686	29.2376	13.5484	12.5353	23.5655	13.0626	7.9638	16.771	7.61716	6.33265	16.2007	9.45887	4.7298	9.88802	21.7661	29.6149	19.7875	17.1707	24.7312	22.6248	7.57042	11.469	1.86672	2.58588	1.88097	6.43188	6.01651	5.41156
Aco012805	41.5134	14.7271	26.7863	-12.0592	0.827196	4.99757e-10	salmon	22.1439	19.1424	19.2681	19.2922	22.2968	17.1937	19.854	9.01382	12.7641	21.3608	9.99363	14.7227	24.7688	9.75217	12.9702	17.525	9.07517	15.7597	16.7321	8.48641	7.86016	21.4961	21.5993	18.2186	13.9941	15.4504	23.0396	17.97	13.1721	13.9803	7.85828	5.66637	7.78737	12.0889	16.1293	12.1293
Aco020841	17.3171	4.39568	12.9214	-8.52569	0.551448	0.00049036	salmon	147.411	140.471	105.884	121.304	109.973	85.513	101.093	87.6353	102.134	145.077	81.7849	91.3441	100.314	81.2623	94.53	84.8135	91.6549	101.366	120.128	151.797	117.961	105.588	122.044	121.809	60.83	130.546	117.431	113.075	97.4726	96.6595	85.3196	65.041	76.5678	141.963	125.947	127.722
Aco026411	41.8082	16.5401	25.268	-8.72789	0.73045	4.25575e-07	salmon	65.3974	72.5247	65.4176	49.1005	51.7783	45.3297	46.4531	38.597	34.8782	59.9721	39.5212	39.762	49.3909	41.6179	33.1348	37.7143	31.7924	35.0007	44.372	41.5149	34.1079	93.3558	62.0179	62.5665	26.153	66.7616	64.1541	45.8362	33.9251	29.3125	28.5317	26.1264	28.7229	46.6618	38.8739	36.6384
Aco009848	17.3988	4.38102	13.0178	-8.63674	0.624501	4.68623e-05	salmon	26.1459	21.1649	18.1834	23.0561	16.7206	17.3406	18.653	15.2357	12.3388	27.7912	13.7718	11.3804	19.3898	17.4587	14.7609	16.7689	16.3964	14.098	22.3759	30.3311	19.2092	18.2736	16.6647	23.3327	15.9811	16.7696	20.3358	15.1044	17.2749	16.1746	14.1009	10.4795	14.256	20.0816	22.4663	21.1848
Aco003829	42.2156	9.8648	32.3508	-22.486	0.742505	2.16769e-07	salmon	61.7215	11.5244	7.30261	70.9253	9.76929	4.17871	118.167	3.45202	1.77959	100.062	7.76887	0.983803	86.8922	2.81046	0.232067	65.5841	1.14684	0.3029	43.8913	0.49533	0	18.2669	54.8383	92.4798	71.071	0.278554	55.279	38.8759	37.0027	20.8185	0.204448	0.082218	0.512825	3.96234	7.8246	11.2048
Aco022840	24.3179	14.7227	9.59521	5.12744	0.680393	4.98487e-06	salmon	13.1434	6.31761	4.08283	13.9366	8.04659	7.17057	38.8116	24.6901	12.4114	64.4887	11.3586	7.18632	26.4115	15.6364	9.44533	9.8798	8.12923	5.81942	5.36446	0.246033	0.846841	13.6101	10.8071	0.446494	1.88552	0.610407	48.6232	1.83056	2.97125	3.77386	0.937256	0.856596	0.693535	0.390498	0.22136	0.752172
Aco005774	74.3131	14.0268	60.2863	-46.2596	0.804378	3.41084e-09	salmon	80.5875	58.8707	53.1772	55.3324	46.7706	43.0118	88.5034	47.2179	27.824	78.583	35.8263	29.2923	86.1755	41.5706	29.3842	94.8552	43.73	26.361	93.3554	66.0377	33.8729	60.8994	60.4538	79.8299	64.7713	34.6591	63.8506	40.919	23.5754	27.4847	17.2419	10.4021	11.056	42.6882	43.2332	43.8865
Aco026084	10.6311	3.07575	7.55533	-4.47958	0.670298	7.73655e-06	salmon	1.52219	0.872768	1.00329	1.08403	1.12738	0.894443	1.07164	0.519315	0.609614	1.51195	0.740882	1.17353	1.4568	0.622217	0.643913	1.26714	0.227377	0.665542	0.891745	0.231846	0.424445	1.05197	1.30067	1.43774	0.455932	1.72198	1.06179	0.815581	0.29693	0.360703	0.45291	0.678665	1.03369	0.695605	0.694866	0.39782
Aco003150	20.6738	8.37267	12.3012	-3.92848	0.752598	1.197e-07	salmon	32.1786	17.2681	16.4875	25.0271	16.3998	14.8135	18.0231	15.4306	12.5714	23.9438	11.8026	14.4253	23.1055	20.7176	13.884	19.9066	20.2761	17.0858	21.623	16.2797	17.8606	29.2607	29.2974	25.8431	14.1781	25.223	25.7459	22.9603	17.6048	15.0222	11.9627	11.731	14.0181	16.9094	17.4337	9.86566
Aco017742	60.3878	28.3889	31.9989	-3.61004	0.889326	4.23439e-13	salmon	59.3347	53.0347	39.3095	53.7098	46.5654	31.5768	55.8421	37.3002	29.3797	57.1926	28.9766	25.2881	51.3355	31.5696	26.0821	39.0046	30.0523	26.9749	53.6175	37.766	23.648	46.6414	45.3692	44.6904	33.799	40.1261	50.562	50.8203	40.4172	35.2196	23.5859	25.4169	28.0705	39.3496	45.9255	41.6504
Aco024329	45.8522	23.5333	22.3189	1.21442	0.688811	3.40941e-06	salmon	1.35802	0.365622	0.361505	3.92985	0.069537	0.384562	17.7446	0.134171	0.372076	29.6263	0.100596	0.7914	10.6793	0.156312	0.602537	8.3413	0	0.492985	5.42839	0.44222	0.503221	1.98445	1.37349	0.171833	0.163094	1.47323	18.7913	0.10737	0	0	0	0.142035	0	0.246247	0.188041	0
Aco014536	15.0103	4.17408	10.8362	-6.66212	0.597948	0.000117524	salmon	5.77323	5.34543	2.81901	8.85643	8.03522	5.06078	8.46398	5.67034	1.4935	2.47248	1.07223	0.087369	4.70354	1.88482	0	2.41615	1.49771	0.233887	6.87252	1.12614	0.359222	0.742116	8.72542	1.05002	1.78296	0	7.5191	3.96084	6.85888	5.39484	0.607973	0.572504	0.46303	0.43568	0.821849	0.460775
Aco015220	15.5292	5.80023	9.72901	-3.92879	0.656631	1.36688e-05	salmon	31.2967	33.2672	15.4542	48.5089	35.3397	21.869	38.0843	26.7497	14.134	32.7485	9.33438	8.69263	25.2891	9.11476	10.2492	22.6299	7.08221	4.75543	17.1115	17.5601	2.55002	21.2394	14.4141	19.0097	29.8732	8.91259	27.6633	54.9542	16.4432	23.2664	2.71197	0.78403	0.649292	6.66887	12.7662	7.45039
Aco016190	71.4374	22.3812	49.0562	-26.675	0.852945	3.96733e-11	salmon	137.561	122.694	103.128	105.835	89.4471	96.0661	114.94	85.6879	63.7429	162.824	109.868	62.0303	113.882	96.5858	60.3989	108.286	81.8418	47.1221	142.855	62.606	30.7571	74.9616	128.565	136.899	103.064	69.8847	129.176	60.7537	45.1836	41.1125	15.2263	14.6006	13.8203	41.1067	66.3916	52.5747
Aco013495	48.5069	17.4779	31.029	-13.551	0.810473	2.09434e-09	salmon	147.903	139.109	135.606	117.084	114.487	114.939	153.631	126.491	103.364	197.297	119.354	82.8131	188.863	140.581	80.9892	133.933	105.15	100.708	188.136	128.218	91.3042	142.233	167.459	218.292	114.858	135.247	164.305	90.3329	99.9348	97.0098	85.2363	77.1507	87.2404	95.0221	101.824	72.8544
Aco026739	22.071	6.63571	15.4353	-8.79961	0.652371	1.62278e-05	salmon	8.03964	9.09882	4.9446	13.2636	11.6696	7.19687	11.0071	7.826	1.4891	3.76625	1.60699	0.395227	7.75055	3.51821	0.096737	6.08557	2.58643	0.356292	7.75391	1.46645	0.675701	2.21857	11.616	1.35081	1.98369	0	12.2656	4.47463	7.49505	6.78296	0.687815	1.08351	1.11945	0.298756	0.601895	1.19784
Aco013180	25.1498	13.0486	12.1011	0.947505	0.70331	1.71949e-06	salmon	8.57707	10.4554	7.61069	10.5646	12.8522	6.78117	12.5557	7.59476	6.44514	41.6874	11.7768	6.48439	23.6961	9.31184	7.92343	14.9984	5.42209	7.06513	12.743	6.04149	5.80655	10.7004	11.7534	8.16076	4.01085	8.19284	12.2951	9.8511	9.488	4.83676	3.28639	5.41877	5.30327	4.94346	5.24565	4.72231
Aco010775	49.5926	23.8913	25.7013	-1.80995	0.713272	1.04907e-06	salmon	0.796994	0	0	2.02454	0.482778	0.200002	7.28175	0	0	14.5589	0	0	4.98995	0	0	4.66656	0	0	2.5531	0	0	2.66643	0.963374	0.091852	0	0	7.91963	0	0	0	0	0	0	0	0.089189	0
Aco022645	111.817	58.4673	53.3501	5.11717	0.962181	8.83805e-21	salmon	29.5257	23.3082	18.1728	24.6665	19.6951	15.1327	22.3128	17.6671	12.6908	35.6554	15.3752	12.1441	22.3535	15.6451	11.6317	18.2825	14.052	12.7466	24.9425	19.6873	12.9486	25.2723	25.3989	26.8197	13.0106	19.9826	26.9564	20.2447	12.2091	10.5101	10.8161	8.76183	9.25529	17.5937	17.014	16.1005
Aco007469	48.9986	13.3193	35.6793	-22.36	0.760807	7.23058e-08	salmon	130.675	117.857	92.9833	106.554	78.6647	58.5207	103.935	63.7682	71.4953	136.088	65.2438	61.3726	122.132	79.3921	69.9256	122.42	82.5826	84.9657	86.3505	119.267	63.7159	107.538	111.514	187.756	59.306	115.516	102.207	95.2356	52.8123	34.5558	8.20408	7.1646	8.05035	103.301	90.5137	74.4324
Aco017560	33.5734	11.4319	22.1415	-10.7095	0.789727	1.0309e-08	salmon	21.5409	14.8467	21.0283	17.3432	14.2393	21.1921	18.7828	10.9479	11.7375	28.3543	10.5355	16.4395	24.9153	11.8108	13.7939	20.9663	8.83381	11.5158	18.2541	9.47863	10.6962	23.1333	16.2635	19.6812	11.6856	21.0279	15.853	15.4186	11.4034	9.14172	5.28467	4.34726	4.49148	10.3567	11.868	11.5182
Aco015917	99.1323	53.3415	45.7908	7.55063	0.932879	1.21179e-16	salmon	147.052	119.28	108.815	119.646	84.0622	78.5157	118.825	81.0019	67.1236	167.281	66.1439	62.0459	106.877	68.2583	60.1322	70.6984	55.8811	57.5369	106.357	78.1726	48.5107	146.018	136.538	133.129	52.9985	113.485	151.338	99.6713	56.8918	46.0661	39.7577	41.1202	41.7651	95.6308	87.6312	74.8159
Aco000448	6.83743	3.26802	3.56941	-0.301386	0.604142	9.5533e-05	salmon	9.77434	10.142	12.2749	9.85479	11.2835	12.5799	12.0709	9.88554	8.45698	18.9612	8.42351	7.44706	13.8101	10.7428	7.67745	9.15009	8.77687	7.91477	11.3541	8.43642	8.37884	8.34101	8.15004	9.36528	8.3464	9.30133	10.4216	9.03291	6.87889	8.72462	8.295	8.39604	11.1562	7.51475	8.10187	7.91463
Aco012376	87.2747	31.648	55.6266	-23.9786	0.894738	1.88492e-13	salmon	273.938	302.23	221.361	255.653	253.207	165.322	294.361	186.016	127.958	253.36	140.874	126.468	263.909	164.325	119.41	272.099	172.74	108.959	263.362	149.437	164.645	259.618	276.674	277.902	150.037	171.633	262.796	234.691	173.138	158.807	124.323	110.444	121.155	197.216	181.598	167.328
Aco016683	40.8537	18.6053	22.2484	-3.64305	0.819637	9.72543e-10	salmon	2.54945	1.95167	1.40166	2.66058	2.73059	1.40236	4.05331	2.03692	0.497115	4.77314	1.29289	0	3.50195	0.570519	0	0.728863	0.323917	0	0.549902	0.068093	0	0.368587	2.5156	1.18561	2.01925	0	3.44569	1.37414	0	0.051286	0	0	0	0	0.531985	0.258721
Aco006515	69.5544	30.8483	38.706	-7.85767	0.908609	1.90414e-14	salmon	107.882	82.7665	61.0193	108.477	60.6998	45.5592	77.9726	47.8996	36.022	146.34	47.5043	41.8942	69.603	43.7181	33.1466	46.7882	39.262	32.6354	57.3324	49.8526	35.0743	65.631	67.4192	85.9661	26.3209	59.4188	75.3635	45.6068	31.0162	25.5766	24.6392	22.4544	27.2985	55.6337	49.6399	49.3676
Aco007973	51.5452	14.4146	37.1306	-22.716	0.796899	6.06618e-09	salmon	120.036	118.525	97.8421	99.206	100.349	93.148	107.476	92.9039	59.1167	136.988	82.5756	53.5713	120.385	98.8204	47.5194	89.5691	91.9174	49.1493	171.538	121.805	59.4403	61.6411	126.562	116.625	71.5795	71.4944	122.213	81.6294	78.4958	74.0853	26.2059	24.2077	31.2193	88.3139	78.7862	68.528
Aco011851	36.3953	13.5398	22.8554	-9.31561	0.800309	4.67939e-09	salmon	121.525	116.894	57.1571	147.365	112.38	48.4085	111.494	65.8416	34.592	140.322	79.5808	51.6587	122.858	75.648	38.5497	98.1894	66.9328	36.7509	70.0499	32.8046	39.6819	108.638	105.87	108.526	27.2253	71.6354	96.3452	63.159	38.3289	20.4707	84.96	70.5191	64.9421	52.3201	48.9931	50.8789
Aco018441	119.256	35.8338	83.4223	-47.5885	0.903036	4.98441e-14	salmon	39.1143	22.6585	12.3623	38.7653	16.9518	10.098	34.3155	9.82658	7.91553	43.3508	10.0559	5.44136	28.4928	8.32972	5.62289	20.0355	6.27353	5.93126	20.4295	13.2476	4.99207	57.169	42.0801	27.506	11.1683	11.9086	44.2553	12.8778	4.44972	3.08476	0.233462	1.90912	0.298984	18.3386	13.2672	11.5058
Aco007561	56.3378	19.5179	36.8199	-17.3019	0.793916	7.58226e-09	salmon	47.2363	45.18	45.8012	38.5551	36.8591	37.067	42.0483	39.3362	31.2349	59.7123	34.2314	32.2917	50.2899	41.3419	29.956	42.6216	36.5767	36.4562	54.9921	40.3136	37.2299	47.7499	44.0569	52.3326	34.7412	45.3211	47.4511	45.3716	44.2849	35.98	23.0236	24.6891	23.929	45.2993	44.3567	40.4971
Aco001164	41.0913	16.2245	24.8668	-8.6423	0.736746	3.00563e-07	salmon	40.5808	37.2984	33.7275	31.8309	32.3708	25.537	36.6885	34.4652	31.28	56.9354	30.4001	29.2906	43.7403	33.6874	28.7777	27.4853	27.9635	36.1558	46.0308	41.9127	36.2342	47.5667	51.0386	45.7222	24.5509	45.8573	47.7433	35.1991	28.3562	20.8628	27.0561	27.5243	27.0947	38.0055	35.2987	36.7134
Aco003239	80.717	34.6325	46.0845	-11.452	0.868425	6.78358e-12	salmon	30.4362	27.4957	22.7943	27.0382	23.913	19.8565	26.7385	22.7954	18.0254	28.9262	16.7637	19.8827	24.3101	18.7308	15.8581	22.9394	17.635	12.7285	26.9354	19.5853	14.0903	37.2389	34.3143	33.225	12.6366	27.3339	29.7726	19.8932	13.4986	10.446	12.3654	8.46004	10.3231	19.641	18.8766	16.8257
Aco017089	38.0988	9.62161	28.4772	-18.8556	0.754996	1.03515e-07	salmon	46.0233	36.6853	53.6224	39.3805	40.2537	49.2869	45.1972	28.1582	24.4393	49.6812	26.7573	35.9517	52.9615	26.0316	29.5802	49.3738	19.1581	27.8586	43.7209	14.3734	23.2074	63.907	44.0975	37.8123	35.0041	36.5333	52.8774	24.4917	15.2115	27.2059	23.7628	9.82906	13.1958	25.0841	26.2093	27.8222
Aco030626	49.2007	12.8625	36.3383	-23.4758	0.773894	3.10208e-08	salmon	10.3746	5.37781	2.43341	21.7416	6.10016	2.03159	21.0954	2.08339	0.519307	11.0094	0.966603	0.515939	4.25018	1.12246	0	6.4776	0.223668	0	1.40362	2.81896	0.326735	5.22752	16.4761	3.85048	2.03782	0.133926	17.3145	9.82188	2.41382	1.81828	0	0	0	0.747712	0.092486	0.102586
Aco000780	26.038	12.9121	13.1259	-0.213851	0.761873	6.76229e-08	salmon	77.5268	41.9488	44.7976	90.1003	61.2484	50.1103	87.954	72.0532	34.049	115.643	22.9195	19.0732	62.1865	14.5924	12.049	22.5593	10.4007	10.1783	22.8141	12.9125	8.22313	20.5059	70.3301	40.4266	68.022	13.786	81.1228	93.3748	33.9227	23.1173	2.34996	2.02747	2.54247	23.2924	18.0625	16.6656
Aco007310	48.4086	19.3339	29.0747	-9.74087	0.832001	3.21836e-10	salmon	153.017	108.234	108.444	134.826	94.2297	77.4141	131.57	78.5531	88.9479	123.932	67.979	90.722	93.3706	67.9583	86.0774	115.318	78.2211	80.1942	131.329	83.0289	84.3021	118.064	125.63	109.296	57.8455	120.012	133.699	104.451	62.51	63.6336	59.5134	57.3679	71.2621	114.671	99.9009	85.2443
Aco002478	3.47973	1.35141	2.12831	-0.776902	0.647297	1.98409e-05	salmon	0.501676	1.64034	0.227473	2.32581	0.604242	0.107708	1.30485	0.386672	0	1.50075	0.280193	0.043051	3.41026	0	0	0.15424	0.553879	0.01318	0.209627	0.015642	0	1.60411	0.768221	0.048819	0.021967	0.767275	1.05886	0.685417	0.338657	0.537564	0	0	0.195098	0.043242	0.819305	0.209372
Aco017265	74.9833	11.561	63.4224	-51.8614	0.751143	1.3062e-07	salmon	38.0723	43.3365	35.5902	28.2916	35.4239	33.5943	43.2978	29.9407	21.758	52.275	31.1101	22.0235	57.3804	35.8315	22.2372	51.6572	28.8316	28.6919	55.9089	43.3226	35.6897	37.956	50.2574	53.0585	25.9603	38.5798	47.5207	35.6832	29.6531	34.7642	27.4381	24.2645	24.3039	37.5204	34.981	31.9497
Aco009653	36.5043	9.38121	27.1231	-17.7419	0.732718	3.75882e-07	salmon	51.1057	74.7148	22.5681	70.5144	82.1844	28.5913	100.688	54.5873	12.2591	84.3811	51.0544	9.52781	79.7916	45.3512	3.39842	68.9146	38.6588	4.47305	104.51	17.5886	0.76487	9.20858	32.6672	45.2519	32.3481	4.00563	46.3545	46.5782	7.70195	14.288	0.564342	0	0.348729	2.16294	3.07243	2.72999
Aco015585	71.3372	22.1491	49.1881	-27.0389	0.855857	2.89108e-11	salmon	35.9545	35.4873	32.0844	35.5427	24.7258	31.8501	30.6338	28.0999	19.8424	44.2441	26.1544	24.6643	38.5289	32.0138	20.9749	30.6257	25.6325	22.5787	34.6901	23.081	15.8353	30.3413	49.8586	42.5248	20.2191	26.3538	50.8244	22.8916	17.6545	20.4684	8.63991	6.37068	6.87393	13.1419	13.5324	12.1373
Aco016537	92.6473	48.7333	43.9139	4.81941	0.927872	3.95986e-16	salmon	90.9149	87.3423	66.0695	88.2156	67.7059	51.8139	76.7057	55.3715	45.8941	116.855	57.1219	51.5022	80.2691	58.2726	43.9183	61.8736	51.4942	50.2304	73.5573	72.2845	50.3266	98.3567	97.5923	89.9019	43.5432	83.3723	100.022	85.3635	51.9535	40.5213	40.9852	31.0117	35.7083	64.7278	59.826	55.5191
Aco024468	30.1349	10.6088	19.5261	-8.91728	0.660828	1.15119e-05	salmon	64.5864	84.1457	62.8875	53.0062	61.8703	54.3789	54.0989	52.8924	47.5077	82.5987	66.8881	39.9471	81.2123	65.1761	40.9825	46.6844	43.2483	53.7117	66.0281	66.22	40.8482	93.4461	69.3807	90.661	32.6386	72.8134	64.5872	54.8808	39.6488	41.114	39.2906	44.9501	43.3313	78.3567	62.8357	55.7344
Aco012490	49.8474	18.9168	30.9306	-12.0138	0.708037	1.36357e-06	salmon	2.29881	1.97741	0.076934	5.52155	1.21251	0.234769	27.4529	0.49886	0.053835	32.1593	3.0358	0.214807	12.9065	1.53756	0.495861	11.7135	1.84946	0.530356	5.74789	0.723262	0.404982	3.59376	2.85704	6.16494	1.67722	1.10058	27.4746	2.20068	1.28838	0.702369	0	0.185714	0.070588	3.54833	4.03617	1.87104
Aco004498	26.0126	11.6648	14.3479	-2.68311	0.759032	8.07646e-08	salmon	47.7663	39.4227	32.057	37.7682	28.3975	22.3411	34.7081	30.3568	18.6891	61.2476	15.4308	10.2703	33.8083	19.3647	7.12021	12.7208	14.833	10.7928	22.0851	54.705	15.5537	31.4512	40.1901	33.1191	13.886	20.5013	46.1607	25.378	14.1647	15.6042	5.01894	6.35135	7.12718	41.6533	46.0999	33.4959
Aco011486	66.9949	30.2893	36.7056	-6.41625	0.871402	4.70811e-12	salmon	54.4228	46.0664	36.162	45.7351	40.9333	27.1895	37.9082	28.3495	21.1597	64.6051	26.7885	25.1169	41.8683	30.9134	19.166	27.7103	27.0208	21.9281	37.1354	38.3101	24.4811	57.811	35.9163	38.8688	16.863	34.0176	35.5645	31.7976	15.424	19.0009	15.5133	12.7798	14.5965	36.2401	27.4942	30.5557
Aco001668	111.187	21.5315	89.6559	-68.1243	0.862499	1.3678e-11	salmon	37.7701	30.2455	24.4962	37.9161	29.7898	22.3695	39.1914	22.2364	15.1285	43.4862	23.9586	15.8936	29.1318	23.0201	14.1524	37.757	24.8988	11.1426	34.1614	32.6223	21.0619	32.255	45.5165	20.6143	20.8603	11.9456	49.027	21.0281	16.8959	13.8467	11.1758	12.0982	17.3743	26.1338	24.5629	23.4582
Aco007592	35.357	7.25748	28.0995	-20.842	0.722013	6.68361e-07	salmon	16.194	12.035	11.2455	16.1904	11.3426	10.4343	11.9654	7.32871	6.39066	15.369	6.19132	4.60446	13.5412	7.53149	3.24848	16.5312	6.1939	6.92468	14.2177	4.55298	5.08227	11.3698	14.0497	7.01124	4.32204	7.54099	13.6301	7.88049	7.55004	5.34812	9.95814	8.82234	11.1722	2.97797	2.31934	3.16242
Aco016720	12.5507	5.30112	7.24956	-1.94844	0.681984	4.64386e-06	salmon	45.5374	30.2731	16.3656	27.1277	10.1657	13.0693	13.0215	3.81951	11.1228	18.8271	8.77017	7.16817	12.3732	4.11696	7.00358	5.4527	3.7206	9.8344	8.60754	1.54778	5.21512	13.7066	25.651	32.6807	4.68847	19.892	47.6077	9.90328	3.80409	4.55397	6.58017	6.84718	5.86963	14.405	18.9937	10.5912
Aco005109	35.4736	11.4833	23.9904	-12.5071	0.771888	3.54437e-08	salmon	133.76	119.071	107.33	128.816	101.447	88.798	120.518	96.5508	92.8945	162.587	86.9395	91.0917	129.549	96.4123	87.5126	103.219	85.6032	106.966	110.979	124.848	112.034	152.297	145.497	115.389	65.7925	115.386	151.538	99.8971	90.5394	67.2905	116.106	94.726	104.307	105.656	100.898	97.2969
Aco017739	14.6686	3.81593	10.8527	-7.03674	0.61146	7.43744e-05	salmon	15.4138	14.0743	16.1516	21.1507	15.7412	21.4198	19.9966	15.1358	6.29424	8.48326	7.24418	3.10377	11.3445	5.30472	3.82695	10.0948	6.52025	2.36004	13.4943	3.43011	2.62425	8.83299	17.9486	8.25993	8.31258	2.31917	11.8085	4.69577	1.70168	4.54898	7.76893	3.15906	6.85581	1.34157	4.68408	3.02852
Aco000398	22.2769	8.02559	14.2513	-6.22572	0.726769	5.19268e-07	salmon	13.8161	19.5527	7.12761	19.6195	26.1378	9.56411	22.8816	12.2033	4.22409	33.3553	16.7087	4.98465	32.6717	17.8709	4.10751	15.8135	6.25032	5.73749	13.4942	4.09827	6.40595	4.5616	14.9421	22.2029	4.31222	11.7046	25.8366	9.24647	9.34029	7.18111	13.1658	7.62095	10.3205	3.59831	4.82416	3.70531
Aco000662	40.7766	13.4951	27.2816	-13.7865	0.812564	1.76451e-09	salmon	324.602	289.639	246.379	342.899	230.365	195.172	335.121	181.417	157.421	329.86	186.804	174.554	279.678	170.698	154.984	297.75	184.601	127.871	241.379	110.011	141.438	253.125	295.612	311.215	151.756	231.223	340.999	264.313	178.089	134.268	217.931	224.042	243.513	218.433	229.034	215.176
Aco011420	54.5856	25.3092	29.2764	-3.96713	0.883186	1.00969e-12	salmon	90.8529	69.8137	24.6893	67.133	31.9344	18.0418	77.5004	34.9104	18.2314	122.585	38.0844	7.53726	59.6061	38.9613	10.1314	43.5318	19.3426	10.1446	37.9209	27.1201	22.693	21.5421	69.4301	71.5819	9.64532	12.1767	75.6479	9.5611	12.0361	4.10596	10.1912	16.3139	14.0442	12.9193	10.662	7.85123
Aco007786	71.5282	26.8936	44.6346	-17.741	0.881466	1.27692e-12	salmon	66.8138	59.0641	41.5093	70.2422	47.779	44.9339	66.7221	31.6033	21.222	71.8931	22.7892	13.8643	49.7391	21.1623	6.95734	30.1636	10.8149	8.9603	48.1209	16.0654	8.67569	59.3507	92.1494	32.4238	14.2226	11.6569	56.0128	28.1184	18.2686	23.5627	15.45	10.391	11.8475	20.8924	37.7906	32.8358
Aco011779	105.257	21.8012	83.4554	-61.6543	0.838461	1.7419e-10	salmon	56.753	34.9488	28.5207	71.8763	43.4407	35.4005	98.1242	27.8807	30.0907	124.59	36.4558	37.6001	90.5603	25.7918	40.712	84.3561	23.8643	54.6977	53.8878	9.31341	18.9957	55.785	64.0739	44.5607	22.5441	27.1813	114.433	38.9233	27.9302	18.5671	6.81776	6.2156	6.24815	17.063	24.2246	14.9515
Aco005494	58.2124	14.1289	44.0835	-29.9546	0.7671	4.84607e-08	salmon	26.5429	27.3429	18.6179	22.2033	22.9414	17.9133	23.8859	15.2235	10.5196	24.5027	17.54	11.7571	20.9412	15.9992	14.4556	22.4269	16.8368	14.1622	20.8752	17.4068	17.5688	41.8195	29.3006	23.6042	9.35718	18.1417	25.7781	22.0095	10.6463	9.16797	14.8525	13.0552	11.6831	15.1199	10.2811	11.5691
Aco029588	59.9406	11.8323	48.1083	-36.2761	0.757469	8.89616e-08	salmon	3.56461	3.55065	2.61571	3.61484	2.27032	3.42942	7.34266	2.8411	1.71438	7.49134	3.75688	2.26045	7.8201	3.68235	3.66036	6.29971	1.75151	1.92821	3.26202	1.23242	1.73487	3.29813	4.43233	4.35742	3.27577	2.78969	6.56274	3.22908	1.40548	3.67347	0.208492	1.02498	0.962696	1.24597	0.528502	1.30769
Aco012904	11.4224	4.8848	6.53763	-1.65283	0.688102	3.52207e-06	salmon	188.597	131.748	141.616	148.464	110.068	99.2241	137.35	94.2098	97.6768	154.516	71.6962	85.4218	93.9287	69.4012	85.1758	82.0899	75.904	86.825	92.9875	106.569	85.4166	108.965	132.564	133.513	67.1476	133.15	128.72	139.862	111.011	91.9143	103.118	81.0741	93.5741	118.559	122.543	104.016
Aco020088	13.4832	2.471	11.0122	-8.54121	0.553695	0.000459837	salmon	180.911	163.272	120.111	175.956	136.559	96.1532	112.857	134.621	122.731	133.314	90.6289	83.471	109.464	95.3608	101.887	107.174	122.202	93.5978	134.173	218.494	113.197	119.155	121.237	125.658	123.673	107.461	153.416	107.145	80.9152	94.7982	72.6104	62.754	70.7255	137.333	123.322	128.59
Aco023317	92.7779	35.2359	57.542	-22.306	0.914489	6.43864e-15	salmon	43.5008	35.212	27.9241	39.7154	35.6959	30.9968	46.9976	34.7208	15.8441	63.5755	26.413	16.5949	52.0516	29.6804	12.6635	31.7916	21.6437	15.8134	40.5307	29.943	17.4924	24.4717	48.7012	50.5637	29.154	21.0415	44.3548	27.3868	20.4385	18.7415	2.7652	3.37236	3.09085	16.8971	20.9408	15.8336
Aco011176	14.197	5.5488	8.64818	-3.09937	0.699944	2.0229e-06	salmon	36.6133	33.4497	31.2993	44.4412	38.4816	31.2339	40.5795	34.9436	23.1494	52.258	35.6667	21.506	46.4714	36.8556	21.9819	25.0378	26.9637	29.8241	43.9187	33.1811	23.1899	39.9207	45.7022	57.9529	28.1722	36.989	44.0109	29.0109	28.1461	21.8118	31.1241	30.402	36.108	44.6285	40.1073	37.1802
Aco016342	57.9113	26.8945	31.0168	-4.12233	0.882968	1.04043e-12	salmon	41.8844	34.2356	23.3885	36.6686	28.0062	17.3554	31.5624	20.6516	8.90746	43.4563	19.722	13.4783	30.2605	22.2036	10.3256	21.719	14.4276	11.3239	26.9258	24.621	9.68726	29.1685	26.0055	38.9824	15.3106	20.5823	31.362	37.7558	26.6788	13.773	8.73866	6.90114	11.6161	26.6922	21.8899	18.3673
Aco013721	172.551	16.3873	156.163	-139.776	0.780781	1.94244e-08	salmon	323.174	242.281	223.611	307.209	195.432	199.393	344.341	221.778	183.166	330.107	172.964	174.963	273.716	172.139	164.903	297.248	193.43	175.018	380.393	378.697	225.564	441.49	393.482	222.351	156.076	183.248	404.956	288.519	230.221	150.587	118.935	122.661	133.435	262.856	251.408	213.497
Aco015704	43.5653	8.75981	34.8055	-26.0457	0.733973	3.50728e-07	salmon	35.1469	36.3065	26.1243	47.483	42.2032	28.8721	71.411	26.615	5.17543	89.749	36.4765	20.7511	76.403	31.8846	9.21098	55.1634	22.2475	3.57033	46.8254	35.3594	4.00203	58.6231	57.1123	57.1175	55.4564	6.69906	63.3771	71.1448	29.8308	70.7869	1.33327	0.241878	0.835792	1.40572	3.63574	3.27478
Aco027121	9.2989	1.86799	7.43091	-5.56292	0.604368	9.48072e-05	salmon	10.2737	30.832	9.07182	15.0286	26.87	14.7588	10.2435	10.774	7.79949	19.6752	19.5965	5.63638	10.6731	9.87353	4.69656	8.54877	4.34566	2.46838	17.7707	7.76674	0.608035	9.90241	21.6599	4.54292	10.4415	1.58587	18.7812	5.58497	12.5169	10.3118	0	0	0	0.488957	1.86843	0.414646
Aco017529	80.4106	24.3768	56.0338	-31.657	0.867234	7.83162e-12	salmon	82.3987	49.0396	38.9742	89.7694	42.288	33.4765	81.322	34.6119	35.3186	66.6111	19.9556	26.5467	50.88	23.2258	27.6499	50.5992	21.1671	20.6575	49.8291	55.0906	22.1731	41.0607	80.221	40.4913	24.9888	34.7127	97.7936	48.7243	24.6695	32.2537	14.7518	8.98462	13.4837	16.1516	21.1369	12.2835
Aco021427	66.8039	26.2529	40.551	-14.2981	0.879296	1.70829e-12	salmon	66.8996	48.5052	37.8022	55.2826	44.1028	30.1045	57.19	38.8282	27.7291	64.8778	28.9019	22.8444	40.8757	30.9572	24.7649	46.8549	31.2592	20.9781	50.3326	36.4654	31.0179	50.8858	54.9168	46.3016	28.2416	29.1971	57.9073	47.4102	45.9903	36.0445	30.0785	25.1988	32.4502	36.732	45.0399	40.5526
Aco024451	18.6867	4.75433	13.9324	-9.17803	0.701229	1.90175e-06	salmon	66.4603	69.7576	47.8598	64.5307	72.6302	52.2111	56.4151	64.0293	46.3869	56.526	39.279	18.7624	58.8874	30.3645	20.1922	57.0508	26.65	17.0645	71.2738	23.6564	20.4044	31.0014	66.8094	33.6266	33.2684	5.53283	61.5847	49.1396	27.0528	18.0216	0.86421	0.984306	0.577162	49.3946	61.2198	66.7968
Aco000931	36.535	7.98556	28.5494	-20.5639	0.713179	1.05401e-06	salmon	27.0444	25.7843	27.0676	25.858	21.6332	24.4879	29.3035	17.994	22.7229	27.3355	15.3881	23.9182	24.6773	16.9942	20.6476	23.0638	15.7565	20.7118	28.0611	21.2316	21.7566	35.2464	24.6909	17.4397	16.7586	22.5996	30.6695	24.5395	19.1831	17.8344	13.3951	11.1868	12.3267	26.062	24.4598	23.6567
Aco028469	39.5203	17.7343	21.786	-4.05171	0.805876	3.03019e-09	salmon	536.758	203.949	101.384	549.997	236.691	113.098	473.998	148.781	48.3423	370.372	98.021	64.8616	392.849	97.5484	75.2424	157.731	58.4769	55.3898	276.528	36.9821	15.7835	156.584	278.243	285.29	127.859	21.4196	342.521	337.821	175.1	92.9777	106.608	81.4647	102.222	2.7861	7.84639	2.77453
Aco007281	66.2783	22.8393	43.439	-20.5997	0.776983	2.51963e-08	salmon	28.0609	27.1472	22.8994	25.0174	22.1842	20.8274	24.964	21.394	19.5426	40.1001	21.7295	19.3576	32.5145	23.4916	17.1657	24.9876	19.4497	22	33.2979	34.4663	25.4493	33.4589	29.7814	33.2865	18.3195	31.4531	34.8854	24.6677	21.6572	16.6173	14.4968	13.0776	11.9481	27.659	29.4363	26.7438
Aco007434	46.7639	19.9778	26.7861	-6.80833	0.795238	6.87159e-09	salmon	30.2807	15.7325	4.33722	27.9486	13.6816	3.41876	21.1664	3.16742	0.218562	11.6712	1.91416	0.298167	13.726	2.90556	1.01578	14.4558	2.84674	0.2786	14.9778	2.28028	0.236167	3.61221	13.3407	2.39325	0.35555	0.067812	17.3578	5.69915	2.10739	4.23918	0.082245	0.122864	0.156032	0.236965	1.26398	0.618203
Aco001801	17.232	5.81051	11.4215	-5.61095	0.592982	0.000138339	salmon	179.454	74.035	82.1299	232.744	113.035	97.9392	126.7	167.795	95.791	60.3719	19.2433	11.8642	48.0093	14.9004	44.2269	22.1914	16.6301	20.9888	50.4427	8.27812	4.43796	11.5027	196.63	74.3665	101.363	1.62899	361.763	84.0209	36.1525	41.9231	9.41909	4.03588	5.11105	7.57211	18.0113	6.5234
Aco014497	38.9294	18.4473	20.4821	-2.03485	0.822261	7.746e-10	salmon	5.99097	6.47831	1.15502	12.6939	4.21729	0.678262	8.45149	1.24872	0.410462	22.8428	3.95286	0.730509	13.2861	1.66196	1.2577	5.08824	0.508206	0.628039	3.55642	0.637605	0.34821	2.54033	11.5104	6.16096	3.5442	0.869633	9.78155	5.76453	4.31859	2.94183	0.270197	0.405731	0.221844	2.96921	3.76654	3.69199
Aco000689	81.5448	11.6529	69.8919	-58.239	0.759029	8.07801e-08	salmon	74.7278	86.9035	68.4403	70.7073	78.4503	58.9509	87.4125	67.027	52.2038	83.4707	64.2725	50.661	103.233	64.0572	50.0346	101.727	74.985	59.8592	105.506	82.1058	64.8158	92.2588	82.4293	84.4843	36.9443	69.3078	86.4377	71.4788	49.568	39.4848	47.0878	55.7368	48.5389	72.9759	60.8643	54.0298
Aco009642	49.8265	9.33436	40.4921	-31.1577	0.714985	9.61593e-07	salmon	17.5622	11.6331	5.95277	12.2284	8.31971	4.7225	12.8757	5.51093	3.01005	20.356	4.35614	2.13639	8.77516	4.39494	1.46639	7.09832	4.37732	1.8413	13.0823	5.78213	3.5927	29.981	16.8162	11.1395	2.58381	3.09722	17.82	3.96557	2.75306	1.86124	5.49553	3.86064	3.9152	15.3312	13.571	16.9628
Aco004808	32.7256	12.7532	19.9724	-7.21914	0.795604	6.68628e-09	salmon	43.6862	42.2355	38.8674	39.3368	34.3558	35.183	32.2744	29.6691	32.2636	42.9759	29.0589	23.421	38.6347	24.3548	23.015	32.2894	22.1812	24.4993	33.4037	23.2351	20.0136	42.5155	32.462	33.3016	28.4613	33.0706	35.1406	32.1673	28.6361	23.537	21.8403	16.0546	18.5094	35.2862	38.5375	31.5223
Aco014982	97.1101	20.0178	77.0923	-57.0745	0.829231	4.15452e-10	salmon	20.3422	21.4675	14.0166	25.3224	25.6136	21.3865	32.1411	20.4959	10.4255	40.669	18.4201	9.12341	33.2682	14.0943	6.24301	28.041	7.35304	4.32931	33.2264	4.11645	1.61989	26.805	28.7898	18.3082	18.8117	2.47548	26.4785	16.3961	19.2851	11.5584	1.24557	0.777165	0.348294	2.12372	2.55825	1.70572
Aco013677	7.63135	1.28311	6.34825	-5.06514	0.571722	0.000270029	salmon	245.414	239.607	259.324	320.064	248.445	299.71	271.663	169.408	302.847	289.071	97.4187	245.488	236.037	114.788	342.098	267.605	150.757	218.469	251.842	124.184	252.985	228.052	275.189	262.473	218.093	255.076	318.702	266.352	113.243	121.166	94.6851	79.0351	115.811	134.383	170.602	122.582
Aco020175	8.15489	2.78597	5.36892	-2.58296	0.671394	7.38214e-06	salmon	2.68752	1.68605	1.05624	2.61165	1.55428	1.23422	1.76284	1.94552	0.564007	2.67405	1.27044	0.405854	1.90215	2.21197	0.672462	1.35783	0.227606	0.791992	1.5195	1.14539	0.770517	0.986308	0.896008	1.46009	0.884247	0	1.83195	1.17155	0.595807	0.578373	0.812261	1.34275	0.927739	1.20883	1.13761	1.83065
Aco011703	63.7055	33.8228	29.8827	3.94012	0.857704	2.35672e-11	salmon	110.715	97.8158	91.6202	86.6886	77.235	78.9076	98.1005	79.0944	63.2085	112.294	57.7707	63.757	85.3303	60.8025	58.7564	50.009	46.6395	63.3138	82.4427	72.6979	49.0443	118.784	110.541	105.917	49.4935	86.6839	120.621	79.3775	61.1116	50.7315	47.9242	52.138	48.9281	82.7897	79.8738	76.2585
Aco006314	42.4189	8.6369	33.782	-25.1451	0.754454	1.06985e-07	salmon	19.2986	19.5843	19.3862	29.9928	19.1433	23.5251	29.8565	14.9469	12.5969	25.3627	13.9375	17.179	29.2654	19.3087	13.6963	30.0876	14.3499	16.0847	22.8726	13.2777	10.3532	14.5095	22.6369	14.3278	8.59835	17.0565	29.0305	6.89322	3.35399	16.5639	2.76394	2.02164	3.4114	7.72669	9.04816	7.61539
Aco008205	77.2488	14.7396	62.5093	-47.7697	0.797241	5.91191e-09	salmon	68.3037	63.8964	48.2087	69.7047	70.3624	42.1316	87.0406	41.103	21.3992	105.842	51.1189	19.2639	91.171	45.0023	20.6324	96.4194	48.9144	29.572	89.5029	57.2852	33.8164	65.7537	81.6236	92.9252	50.2872	32.7108	85.1459	84.0473	87.9355	64.1023	18.4112	13.3445	15.965	57.2877	59.0453	50.2303
Aco017365	121.954	17.6471	104.307	-86.6598	0.813574	1.6231e-09	salmon	24.7376	13.7564	16.1507	27.9608	17.4445	15.7143	30.9011	14.7967	9.9627	26.2885	10.8373	9.77194	27.0165	9.8516	8.76092	27.6575	11.6947	8.95122	31.8233	15.59	11.177	13.4841	22.8644	15.3679	16.3428	8.43403	21.6744	19.1325	14.725	14.5254	4.472	6.47424	5.9573	9.55393	10.112	11.1588
Aco006563	46.0433	16.1601	29.8832	-13.7232	0.792119	8.65772e-09	salmon	15.1628	16.4331	11.0814	13.2275	10.0163	10.557	12.2121	10.0177	7.13117	14.6345	8.14689	6.82279	11.2795	10.1717	8.23227	11.0044	11.5594	8.28638	14.6456	14.6039	11.1879	10.6096	13.0418	14.3736	6.89864	10.7715	14.9851	10.1842	3.81337	4.65542	3.58129	3.99263	6.88412	11.0014	11.5161	8.78099
Aco006230	23.6273	12.221	11.4063	0.814697	0.739045	2.64055e-07	salmon	20.7539	3.82088	0.080609	42.2956	4.88534	0	24.3978	1.66149	0.706787	40.4147	0.800752	1.33971	24.2373	0.59292	3.56139	19.4933	0	1.9182	6.24632	0.586978	0.231048	2.46551	4.80069	0	0.160049	0.456245	12.7415	11.1577	0	0	0	0	0	0.499224	1.10066	1.19121
Aco011540	27.8083	12.3073	15.5011	-3.19381	0.69502	2.55559e-06	salmon	47.8397	49.1465	55.2742	43.1412	42.0205	45.3953	42.5292	39.4006	36.0643	58.5756	38.3182	37.7952	47.78	40.6822	34.2249	30.5065	32.951	40.6511	47.7961	38.6433	39.5456	50.6784	47.7878	50.5327	30.185	59.5119	52.9386	48.3734	37.4469	32.264	29.3709	28.5243	31.669	50.5327	46.6587	45.0922
Aco009182	122.682	15.9734	106.709	-90.7354	0.805006	3.24612e-09	salmon	13.4602	9.61736	10.318	12.0248	9.52035	9.78297	12.8175	10.7856	7.47927	17.2493	5.90215	7.79394	13.5637	8.87505	7.92895	11.6585	8.70804	6.70184	18.677	13.1287	7.72515	15.176	15.9602	11.7685	9.6033	8.51949	15.3003	12.2924	10.5087	11.6119	5.03054	7.55335	5.60564	11.9055	9.75892	9.97481
Aco019334	19.9353	5.22654	14.7088	-9.48227	0.691383	3.02823e-06	salmon	6.46467	5.90734	6.23263	7.64339	11.2074	5.71541	9.01081	4.27696	3.16978	8.12649	4.12023	4.33957	8.48742	4.67335	4.07419	6.77002	2.72064	4.31923	7.10084	2.30972	1.59659	6.90699	5.87067	2.14558	2.94714	2.2712	6.77813	4.07486	3.04842	3.01077	3.60721	3.5583	3.54584	1.46206	2.75962	2.83284
Aco020400	15.9522	6.78019	9.17201	-2.39182	0.667457	8.72924e-06	salmon	107.877	81.2795	72.6185	122.835	71.8784	63.8696	140.928	50.4497	53.2886	126.649	50.3816	69.2142	83.2973	35.3157	49.4986	74.6599	31.7102	35.6284	49.2995	26.0834	35.4715	27.8365	76.5143	68.4613	56.3649	56.772	113.712	144.635	96.4947	71.1306	36.9506	39.0221	44.2871	40.3435	51.1301	37.1925
Aco026327	27.4873	14.264	13.2233	1.04078	0.662815	1.06032e-05	salmon	169.213	52.5765	25.9505	281.799	60.8402	24.9183	459.091	29.3196	11.0869	797.245	75.5392	44.1963	491.281	46.1922	26.2932	226.841	13.4585	6.23932	52.9081	10.9183	2.56287	12.4467	14.9696	96.1702	96.4197	3.21558	67.4539	58.693	22.2025	59.2298	0.503576	0.153397	0	0.576924	1.14649	1.44614
Aco005687	140.082	48.1514	91.9305	-43.7791	0.956262	1.00049e-19	salmon	31.9221	22.585	12.2254	27.7159	17.5581	9.85764	33.2941	12.429	5.41812	37.3587	11.3833	3.88501	22.193	10.214	4.37432	25.6519	8.22208	4.69779	22.7457	13.9798	8.81829	21.1071	26.7568	22.3896	10.8319	8.67976	32.3045	14.7964	13.299	8.72885	4.5663	3.81848	4.94719	9.18609	7.46653	9.88843
Aco002108	72.9817	31.4861	41.4957	-10.0096	0.906566	2.7284e-14	salmon	52.2089	47.0778	55.7397	40.2395	40.4614	43.0095	49.5798	35.6704	33.1464	67.8241	29.364	26.6891	54.6782	34.3553	27.1114	38.5831	25.9469	32.2135	46.5838	39.0603	24.0792	45.9778	52.2467	45.2297	36.5224	35.7283	60.9694	27.5097	27.472	21.2144	16.6657	17.539	16.1325	32.622	28.35	29.4507
Aco027998	43.8376	12.8956	30.942	-18.0464	0.823033	7.23939e-10	salmon	12.447	8.03416	6.46746	9.92582	7.00317	7.91727	8.33985	5.09858	5.4695	10.0212	5.54013	5.36379	10.6876	7.30633	7.92262	9.97605	4.64744	8.0663	8.33928	4.89736	5.90994	9.35313	11.4728	9.57942	7.2312	6.33426	11.4688	6.44109	6.65604	6.31756	4.3738	2.96349	2.17433	6.41228	7.96389	5.86156
Aco007490	45.0113	19.1579	25.8534	-6.69553	0.813677	1.60935e-09	salmon	54.7284	56.5545	62.2334	49.6696	50.6515	45.6646	47.9692	42.9812	41.8302	62.8076	43.6101	47.1879	55.5586	46.3832	36.4944	51.6359	35.6833	40.2618	58.2747	42.0366	34.546	61.5285	55.873	55.722	30.9513	45.2571	57.0782	49.0517	45.3467	40.881	28.1316	31.2	32.2003	53.8097	47.2174	52.4754
Aco015500	15.0841	7.43904	7.64505	-0.206014	0.617922	5.93128e-05	salmon	68.0443	64.5319	6.29535	74.6065	80.1284	7.67615	189.619	62.5583	7.9415	483.986	104.044	11.1906	165.22	71.9435	14.9681	93.6385	55.4854	21.8461	43.4546	14.3791	9.20653	30.0627	35.3923	130.239	24.6013	22.0541	51.123	227.607	62.3129	15.2581	6.99869	13.1773	10.5	32.5224	28.1127	37.4238
Aco006822	109.697	43.6979	65.9989	-22.301	0.920264	2.05206e-15	salmon	13.519	12.2201	9.23427	8.74831	5.83498	6.21488	11.6171	5.70883	2.75047	15.2068	5.59065	2.63206	8.96166	4.79299	1.75151	7.39051	1.8225	1.48061	11.6332	3.5492	1.59361	16.8864	12.2527	11.7871	1.55962	4.88947	13.4149	5.50237	2.56659	1.5955	0.915162	1.63666	1.92392	2.49585	2.87354	2.14811
Aco015923	86.1147	32.083	54.0317	-21.9487	0.864521	1.08077e-11	salmon	71.5937	71.3521	53.6246	64.0311	61.0386	50.0357	69.6123	49.9477	35.8316	97.2039	59.8134	37.0037	85.8439	62.5593	38.1479	68.6189	47.3959	44.5704	89.4958	73.0962	42.8654	85.152	84.0016	94.8214	42.568	58.8101	69.3221	61.5182	44.0624	36.5631	40.3399	36.3996	37.9326	58.6638	44.513	47.1606
Aco030252	81.7219	28.5106	53.2113	-24.7007	0.878752	1.83613e-12	salmon	47.3861	37.1785	37.0349	31.3833	31.6907	27.6914	38.2981	27.5041	20.239	49.23	31.4582	19.2273	39.3601	26.5941	16.0417	33.5985	24.2146	9.83112	56.9191	21.2547	9.41804	31.1628	43.2779	46.9345	27.1527	21.1248	45.1531	21.7045	14.8193	15.1236	2.51351	5.69101	5.0508	16.1277	24.2876	19.0992
Aco014421	32.2713	9.07444	23.1969	-14.1224	0.745238	1.85064e-07	salmon	6.87107	5.40771	2.9006	12.7618	3.7245	2.20454	9.23507	1.10121	0	14.7895	3.50254	0.643642	11.9821	1.53191	0.644303	9.82832	2.46592	1.33311	3.26649	1.11544	2.52365	1.85435	3.10726	14.4902	3.63902	1.83709	4.05275	5.78701	1.2856	1.26659	0.647918	0.794826	0.339988	2.19269	2.53778	3.28271
Aco005094	82.3866	34.2922	48.0944	-13.8022	0.891669	2.9985e-13	salmon	29.4197	26.3772	14.747	25.4481	16.1756	8.40997	26.913	13.8128	8.08383	37.4205	15.6457	5.83024	23.5746	12.5941	5.76025	20.231	12.8185	9.02315	21.6809	22.1545	10.5819	33.8892	32.6336	28.4813	8.60332	18.4038	29.1859	15.7013	7.80437	5.43322	12.333	9.68331	15.6019	16.0434	13.9587	11.3635
Aco000445	81.8567	36.3804	45.4763	-9.09592	0.857074	2.52778e-11	salmon	163.005	131.575	123.483	133.809	102.908	97.4155	140.285	96.0208	88.6777	161.787	69.7824	91.9898	124.988	79.2112	78.3839	77.7012	71.4973	82.0165	132.509	97.5571	71.8392	183.032	166.916	135.712	69.4148	134.56	183.612	126.317	94.0732	71.4453	48.421	58.6009	56.2224	132.801	122.632	112.023
Aco017313	40.8477	15.4605	25.3872	-9.92667	0.72135	6.9201e-07	salmon	27.2809	31.2278	21.8792	21.0751	25.4361	17.6006	21.6325	23.5222	15.7361	38.0413	23.3287	15.5348	32.3288	26.7628	15.4016	20.0687	18.6597	21.1949	30.3443	25.1696	18.8535	32.7854	28.6909	39.7356	13.1344	31.9059	27.07	17.9647	12.6018	13.9021	14.3216	16.3483	15.4252	29.6865	23.9312	21.5689
Aco022049	27.1351	8.14504	18.9901	-10.845	0.712806	1.07407e-06	salmon	20.8839	14.3508	19.5724	25.7508	18.3095	16.5536	19.5424	16.3935	11.9384	24.8302	10.0977	10.993	19.8303	14.1266	9.60109	10.4285	13.3389	12.9486	15.0702	18.762	13.0147	30.5764	33.2299	23.6606	14.6753	16.1767	34.5675	22.8153	7.73078	3.82464	10.011	12.7375	9.9541	24.075	18.2182	23.6307
Aco005948	31.8847	13.6966	18.188	-4.49138	0.774426	2.99363e-08	salmon	31.3062	27.5673	30.7057	26.1508	24.0672	28.3628	33.9062	27.6413	24.6111	50.963	25.5167	25.0734	39.6511	29.0624	21.2347	33.8844	24.9002	23.1967	31.4984	25.1678	20.3171	32.6822	38.3934	50.01	25.6744	40.8712	39.1642	32.9029	25.1638	22.7215	16.9521	19.5587	19.4005	27.3402	31.1459	28.8901
Aco007903	92.3908	44.1838	48.207	-4.02318	0.913134	8.32246e-15	salmon	124.342	114.576	98.6513	100.881	83.4255	74.9988	94.2774	70.588	58.3311	155.785	68.4686	58.576	96.0862	76.9432	54.2336	62.6268	55.7311	59.5597	94.3538	75.8957	53.2542	115.085	105.251	125.578	53.2058	109.546	109.67	91.586	55.6762	53.5628	38.5073	33.4656	34.3203	74.1896	63.0328	61.289
Aco030221	7.6677	2.85864	4.80906	-1.95042	0.558543	0.000399693	salmon	111.204	83.1857	62.1957	155.979	101.105	80.5846	174.222	103.652	58.7314	141.582	79.1297	31.0685	146.9	63.7687	48.8033	113.049	60.0253	38.7834	54.2308	78.6107	33.1514	9.86669	72.1686	34.2004	64.2913	12.3445	95.6043	122.245	92.7547	114.175	49.0791	34.0672	30.6409	73.6133	51.4807	95.87
Aco016583	95.4571	11.1695	84.2877	-73.1182	0.722057	6.66836e-07	salmon	17.5897	14.8098	13.6967	15.8099	16.7068	9.29156	16.2403	13.3228	10.9555	19.8041	10.1308	7.50804	20.7114	11.5631	11.3769	15.9738	10.0861	11.0906	22.7886	19.0862	9.06484	28.1091	21.233	16.1325	11.8101	11.4856	18.6335	19.9608	14.3763	13.5576	9.30841	7.98539	8.79483	17.785	16.4027	15.4895
Aco002832	91.2066	36.8592	54.3474	-17.4882	0.897078	1.31034e-13	salmon	616.031	303.819	148.298	691.476	299.293	160.497	595.694	166.042	54.9392	549.582	120.838	56.6559	354.236	114.879	43.2428	336.377	65.1285	23.3819	377.305	43.6307	11.0001	222.93	419.316	173.815	100.913	24.3147	421.937	199.892	80.3369	74.774	13.2235	8.00075	7.8971	27.7745	52.41	29.7705
Aco027879	5.54502	2.42032	3.1247	-0.704376	0.62908	3.96478e-05	salmon	6.75977	0	3.62985	5.13073	2.36018	0	4.82893	0	0	10.0051	0	0	14.6483	0	0.984649	0	0	1.01777	0	0	0	0	3.35405	6.60383	3.56593	0	4.7309	3.77234	0	0	1.63687	1.85152	1.38907	0	1.00847	0.636074
Aco008886	27.9294	10.5661	17.3634	-6.7973	0.733637	3.57304e-07	salmon	261.247	223.241	145.666	210.549	173.129	132.33	173.693	118.263	64.7885	137.217	137.239	77.4954	120.784	142.801	66.9141	106.609	107.45	74.0424	167.648	73.0374	94.3158	128.052	249.377	170.013	55.2606	116.218	277.83	87.2794	85.7801	59.0029	116.732	104.34	120.599	80.3899	103.832	85.2442
Aco007205	149.73	16.8386	132.891	-116.053	0.804678	3.3312e-09	salmon	13.3162	13.752	11.488	10.6899	11.1079	9.73235	16.9598	8.99428	11.5565	21.8241	10.7914	8.7254	17.7884	11.0611	9.01594	16.3749	10.2258	11.0968	20.6662	14.7252	11.5857	16.8271	16.2539	13.9731	8.46654	11.0384	19.8656	11.9822	13.6717	8.10817	5.48608	7.08359	7.56783	11.6807	15.0017	11.3934
Aco004457	49.1654	13.8773	35.2881	-21.4107	0.801763	4.18312e-09	salmon	10.33	6.39497	7.31234	12.7843	11.3307	8.18263	14.2386	3.50115	2.38963	19.7652	7.30715	4.18098	12.8444	3.69498	2.97714	11.5993	2.26023	1.74773	8.99758	3.85404	1.24455	5.66261	19.7659	18.7511	10.2428	2.23036	16.6197	11.3084	4.66747	10.1133	1.13486	1.78479	2.69553	1.30586	2.74175	2.75527
Aco017783	97.0164	22.3651	74.6513	-52.2862	0.844475	9.59665e-11	salmon	187.857	145.633	144.812	165.425	114.458	117.355	203.147	121.875	85.0192	212.643	106.45	85.0628	178.828	115.04	82.79	131.922	98.37	117.601	199.163	108.678	142.16	209.879	193.167	158.948	82.3629	122.387	210.584	120.031	160.385	99.9143	85.1221	87.8509	85.1118	151.771	156.232	162.464
Aco013164	21.241	11.1375	10.1035	1.03395	0.592185	0.000141969	salmon	6.88916	3.44108	0.604993	8.93197	1.17957	0.448213	3.96172	0.112449	0.024452	0.393567	0	0	0.05673	0.100263	0	0.089948	0	0	0.089612	0	0	0.415958	1.88288	0.052906	0.062913	0	5.27115	0.042635	0	0	0	0	0	0.096719	0.037132	0.254325
Aco012980	8.48121	3.37201	5.10919	-1.73718	0.469661	0.00385272	salmon	0.397991	0.117607	0	1.77075	0	0	0.086185	0	0	0.392774	0	0	0.095051	0	0	0	0	0	0	0	0	0	0	0	0	0	0.49877	0	0	0	0	0	0	0	0	0
Aco019118	37.5251	11.2696	26.2554	-14.9858	0.736881	2.98284e-07	salmon	28.5921	34.0359	13.4501	38.6945	60.0639	17.0457	75.6676	36.8471	3.63012	71.7541	39.1837	9.96629	48.653	38.3217	5.61815	45.7511	22.3923	6.4494	38.3508	10.0264	1.71276	5.01469	30.5754	26.5026	25.9654	8.92732	50.6734	27.7153	21.5247	15.1825	4.82613	1.94486	5.02405	3.62847	10.089	9.93613
Aco007572	13.2235	7.11112	6.11239	0.99873	0.516998	0.00124407	salmon	4.8214	0.240067	0.054799	6.57528	0	0	2.65928	0	0.206529	0	0	0	0	0	0	0	0	0	0	0	0	0	0.779572	0	0	0	3.53627	0	0	0	0	0	0	0	0	0
Aco022512	31.2124	5.41393	25.7984	-20.3845	0.62284	4.976e-05	salmon	65.633	75.5435	51.1076	56.3478	55.9533	38.0027	59.1665	48.4475	45.7301	66.6106	59.7497	51.4071	63.997	57.0465	58.827	62.352	52.9356	52.4354	58.5532	65.6523	62.1205	76.8971	79.9708	90.9389	44.06	79.2074	66.6692	77.8763	49.342	41.8044	26.582	21.9208	24.4753	70.5261	53.1417	61.3463
Aco012316	75.1589	25.5872	49.5717	-23.9845	0.861131	1.60068e-11	salmon	33.2731	25.7792	23.3481	36.4397	24.9451	24.8999	29.8948	17.096	11.4348	28.5634	16.4272	9.8279	23.4932	15.6029	8.36793	21.7409	10.5987	5.86973	22.5169	6.59718	4.83316	20.9747	19.597	25.2307	17.3009	10.9203	23.8724	16.3311	12.5769	12.5165	6.44382	6.75581	7.02671	10.2471	14.0027	12.0884
Aco015927	16.4719	1.97141	14.5005	-12.5291	0.548376	0.000534989	salmon	1.20347	0.191476	0.248493	0.830962	0.258177	0.18932	1.25961	0.272666	0.216664	3.11036	0.864366	0.199334	2.1394	0.251896	0.343198	0.997411	0.040883	0.144036	1.24196	0.345252	0.398187	0.34203	0.529309	4.38725	1.46603	1.05331	0.93713	1.4038	0.055792	0.172027	0.299809	0	0.11707	1.48851	1.12572	0.521412
Aco017056	36.7251	12.3764	24.3487	-11.9723	0.773893	3.10229e-08	salmon	19.1021	15.389	12.256	15.9333	13.6759	13.2222	16.9328	3.5871	2.55155	11.7149	4.3202	2.11565	11.1895	3.45452	1.73542	15.4969	3.12037	1.80809	12.291	3.80127	3.86505	7.88921	11.0773	5.37675	1.39812	4.8588	11.4129	2.42945	1.17674	0.970861	7.07493	2.68752	1.75317	6.06985	4.63115	3.90749
Aco022787	111.388	38.7729	72.6153	-33.8424	0.929651	2.62621e-16	salmon	28.4136	26.7068	18.9362	27.9232	18.3872	17.2727	26.7462	15.843	9.22367	40.1803	13.9601	6.91354	33.3802	12.9404	6.79967	22.1452	8.69928	7.52064	31.2273	18.2402	10.7256	18.5791	32.0341	26.8734	17.2653	11.5629	34.718	21.581	20.5922	14.3345	5.85507	5.09098	6.35012	17.3971	18.2279	16.78
Aco007743	109.151	22.6793	86.472	-63.7927	0.853387	3.78283e-11	salmon	64.5109	51.3958	45.4233	60.1325	52.0581	46.7518	84.8912	56.5438	32.6604	100.266	37.4886	31.2208	78.5508	51.6746	28.1595	56.4925	46.2413	36.8986	74.2376	51.661	39.5064	75.5425	90.1475	70.7769	44.0528	54.6999	102.2	85.8406	58.3457	55.0542	26.962	22.6074	23.698	61.7449	60.1659	54.9763
Aco003562	21.3506	8.07939	13.2712	-5.19182	0.546066	0.000570906	salmon	97.9002	37.7404	21.5186	119.479	33.4899	23.4078	66.4927	15.2172	0.801721	4.66117	3.59543	0	4.27997	7.33211	1.03768	2.30244	2.27644	0.588969	6.24537	0	0.444093	7.29237	45.9805	0	0	0	30.9916	0.171762	0	0	6.63903	9.97666	9.35075	0.063705	0	0
Aco003299	50.4947	19.8665	30.6282	-10.7617	0.770849	3.79567e-08	salmon	42.8899	43.6483	42.1078	33.034	37.5221	37.9956	42.0336	37.0106	38.0902	52.4593	34.5361	33.5777	47.5382	35.5235	28.1583	38.2495	33.0138	31.9575	43.0904	38.3251	27.7241	55.3082	56.1796	50.8464	28.0741	42.6075	51.1954	52.1035	30.4022	30.1258	25.991	24.1483	26.067	49.4076	42.0769	37.085
Aco008841	47.8212	17.7554	30.0659	-12.3105	0.835859	2.23761e-10	salmon	38.2704	46.229	11.3442	56.8793	25.8461	8.41403	38.2767	21.3341	2.18536	48.3422	15.8329	1.91494	18.8111	17.4297	2.85043	11.648	14.0467	2.6738	8.69603	6.66462	1.50939	49.0444	24.072	40.5316	1.06934	6.58876	32.2107	6.94986	0.853784	0.288333	2.16354	1.36955	0.112746	2.30904	1.33113	2.40846
Aco000757	2.73034	0.56213	2.16821	-1.60608	0.54081	0.000660698	salmon	2.14302	1.01118	0.531058	1.51663	1.33095	0.61313	0.226861	2.26473	0	1.97901	1.17696	0.055447	0.627333	0.167116	0	0.128318	0	0	0	0.122675	0	0	4.65577	1.2234	0.19712	0.173	0.395029	0.777937	0.018018	0	0.057261	0.182423	0.038726	0	0.22475	0.136246
Aco027551	26.734	8.05347	18.6805	-10.627	0.761324	6.99964e-08	salmon	13.3612	12.2622	10.9076	11.5928	10.6749	7.58255	9.95173	15.2267	11.5722	14.7731	9.44838	6.23833	11.9056	9.57169	5.67423	12.6404	8.5747	4.24719	11.8882	12.7446	3.8205	10.3841	14.0336	10.5253	11.2323	4.74678	17.3616	6.95334	5.42809	7.32388	2.39862	1.98141	3.7855	9.45542	8.28361	7.66141
Aco011084	47.5375	24.0801	23.4575	0.622619	0.696532	2.37974e-06	salmon	1.14983	0.245734	0.173282	3.37934	0.133027	0.133219	14.0776	0	0	24.3951	0.081935	0	8.50048	0.354963	0.27894	6.36829	0	0.39274	4.54191	0.177926	0	1.42297	1.4743	0	0	0	15.9114	0	0	0	0	0	0	0.317975	0.137407	0
Aco011196	146.651	20.317	126.334	-106.017	0.848037	6.66194e-11	salmon	2.85365	2.12117	0.619017	2.37424	0.989529	0.81233	3.38253	0.692561	0.183108	3.54846	0.431069	0.223293	2.24011	0.548513	0.287067	2.68066	0.475249	0.023303	4.80077	0.273558	0.399742	2.46987	2.37343	1.41009	0.171801	0.666613	2.27106	0.426137	0.243826	0.362969	0.02704	0.324578	0.23536	0.4657	1.04207	0.801709
Aco008788	25.657	9.73896	15.9181	-6.1791	0.685717	3.92596e-06	salmon	62.5891	76.1933	67.94	51.6371	57.5228	55.0317	60.0341	60.7161	48.4328	83.9251	58.4684	47.0643	74.5502	73.414	42.1576	69.8814	53.4829	40.8623	79.3756	59.5624	34.3393	94.0824	75.5439	104.25	53.7365	80.0441	70.5603	60.0511	42.1279	37.3968	52.2231	38.0153	51.8358	61.22	54.8676	54.3764
Aco007304	72.3815	19.927	52.4545	-32.5275	0.810973	2.01071e-09	salmon	53.6086	54.2179	45.9309	47.1185	43.3152	34.9425	69.9781	40.1937	31.4677	83.628	41.3975	37.638	80.2767	40.5629	33.4911	71.2708	41.3881	39.5403	56.9863	56.5899	44.7495	67.3842	84.2935	89.4572	38.4067	62.2272	74.091	61.9565	39.8023	32.0291	26.3397	23.8579	22.5193	61.1459	53.9591	46.7491
Aco012773	22.2711	5.33488	16.9363	-11.6014	0.600208	0.000109025	salmon	157.341	154.081	114.678	139.465	115.121	86.1989	116.443	95.9324	84.0702	154.038	92.0163	72.1339	112.517	100.034	75.2973	81.9325	105.02	101.017	112.516	178.342	153.224	120.73	124.39	147.668	69.7118	125.889	125.315	130.917	105.914	84.9698	92.6419	63.6242	73.2905	140.688	107.934	118.016
Aco001688	74.9677	15.0639	59.9038	-44.84	0.810296	2.12472e-09	salmon	45.9982	45.3348	42.0344	43.9652	45.919	36.5698	49.329	40.1434	40.0015	51.8745	33.7431	37.7256	44.1783	33.3448	37.4337	46.7787	31.9365	34.731	53.0913	28.1423	29.2737	50.2747	55.1453	43.5776	26.8386	51.4647	63.2101	45.8163	34.866	29.6529	31.5731	29.1113	33.2937	43.5931	39.0239	40.4098
Aco003758	27.4163	9.29462	18.1217	-8.82707	0.748697	1.51076e-07	salmon	109.981	85.1147	71.2639	88.7719	77.5411	57.8808	82.4116	60.0902	45.268	85.9882	54.2131	45.0822	66.0701	53.727	48.4204	100.501	67.1976	42.9227	92.217	64.7135	60.7418	79.3148	83.0707	85.25	38.7807	64.0874	75.2348	89.2275	76.7646	60.9629	44.4707	48.1746	60.855	69.9078	74.5852	75.6723
Aco010628	44.6057	16.4065	28.1992	-11.7926	0.760002	7.60359e-08	salmon	80.9829	74.9689	49.7254	58.6773	41.6695	35.5827	66.1266	37.5266	31.0911	105.757	41.0155	25.5389	56.8369	36.0316	28.0897	32.5013	21.8866	69.4799	52.535	53.6096	34.1961	136.164	80.852	65.3313	19.5497	43.1292	106.256	60.1324	26.4198	21.1236	7.96844	9.63127	7.49163	85.2699	52.1625	66.8091
Aco021174	11.6462	4.09626	7.54997	-3.4537	0.578263	0.000220881	salmon	232.624	123.641	184.605	346.206	171.602	204.819	409.541	221.51	233.551	284.109	62.9902	173.088	215.09	50.7559	217.999	117.665	49.1855	139.097	82.4367	82.6541	32.1895	51.7987	229.531	167.414	232.551	135.618	336.275	412.242	178.273	137.326	4.14799	1.27365	0.934081	34.928	68.9631	38.9518
Aco006304	27.1983	10.0969	17.1013	-7.00442	0.782151	1.76631e-08	salmon	6.13919	7.00846	0.90459	8.03115	5.91799	0.563907	4.99494	5.61458	0.263782	14.9746	8.80534	0.239844	5.61572	6.38309	0.287638	4.74674	1.3831	0.275165	4.66088	0.142041	0.14813	8.746	6.7232	3.84067	0.360007	1.0206	3.95884	1.42251	1.02304	0.139707	0.079664	0.071703	0	0.371705	0.528738	0.196227
Aco010703	52.3512	20.1195	32.2317	-12.1122	0.783541	1.60266e-08	salmon	33.1136	3.88537	0.82513	50.8268	6.35159	1.42826	70.2902	3.05886	1.22837	93.8082	2.54645	0.960905	53.2429	1.33016	1.11443	38.8018	0.70358	0.385094	15.3584	0.600635	0.266456	16.7205	27.8487	7.05741	1.02629	0.327016	20.0085	1.97936	0	0	0.1335	0.16629	0.140473	0.452248	0.809522	0.40518
Aco006138	40.5894	10.0149	30.5745	-20.5596	0.758972	8.10672e-08	salmon	102.447	118.375	83.8873	92.6344	105.189	80.1719	113.085	78.9524	62.5692	112.11	85.5724	49.2695	86.792	79.9241	48.7412	109.694	79.0888	48.5507	107.983	67.2575	58.7739	129.498	125.128	126.564	59.9787	66.2544	120.793	86.9482	83.9513	45.0324	68.1578	87.9843	89.0857	75.8999	88.8594	76.8009
Aco016682	50.6655	23.3	27.3655	-4.06551	0.849291	5.84623e-11	salmon	133.002	88.9046	43.6557	126.736	88.5534	51.1768	136.948	68.8379	15.5832	230.604	50.3547	9.03709	107.78	31.4047	7.52468	43.0432	11.9673	7.86788	24.5262	22.9935	3.94966	16.8523	72.7965	68.5655	48.5113	8.92062	81.9181	43.1954	8.17461	10.0104	0.523051	0.542369	0.271816	13.8469	13.4035	13.8543
Aco017380	37.0583	16.45	20.6083	-4.15824	0.746926	1.67687e-07	salmon	1.12982	0.47161	0	0.339174	0	0	1.82667	0.243961	0	4.204	0.332241	0	1.66595	0	0	1.17983	0	0	0	0	0	1.40854	0.613706	0.322355	0	0	3.7898	0	0	0	0	0	0	0	0	0
Aco012079	41.9252	15.5594	26.3659	-10.8065	0.70291	1.75328e-06	salmon	1.47801	0	0.988185	2.47212	0.628637	0.587296	6.75594	1.36342	1.28583	6.10776	1.05182	0.724658	5.08269	1.00309	0.34942	1.66637	0.499212	0.46437	0	0.161938	0.073204	1.38809	1.86848	0.211111	0.681442	0.151139	4.66379	0	0.415383	0	0.083722	0	0	0.045965	0	0
Aco022885	41.7962	14.99	26.8062	-11.8161	0.817749	1.14302e-09	salmon	6.90559	7.57641	5.4391	6.64958	8.23631	4.22663	5.67695	4.08114	2.0948	8.75303	4.15937	3.57138	7.1653	2.17279	2.58969	5.68201	1.54762	1.63251	4.30928	0.371403	0.848495	5.05363	6.63934	4.88175	2.67299	3.20887	5.9453	4.75773	3.75051	3.07412	3.17495	2.48395	2.701	2.3639	3.13973	1.7806
Aco005993	85.4293	33.9251	51.5042	-17.579	0.867933	7.19977e-12	salmon	28.1548	24.2258	21.3463	23.4836	20.0333	16.149	20.4167	20.6799	16.8514	33.5984	13.2795	12.7929	26.4377	16.7215	16.4382	19.1415	15.946	16.5232	28.9166	28.3287	17.9364	30.3313	28.0072	25.425	15.6617	21.9945	31.6847	22.7409	18.8415	15.9474	9.87648	11.5125	10.2529	19.7519	20.3114	18.7382
Aco016546	25.9135	11.3543	14.5592	-3.20492	0.767549	4.7075e-08	salmon	3.42676	1.59119	0.687154	1.50066	0.41234	0.462274	1.47654	0.170145	0.058749	1.12331	0.083372	0	0.762008	0.125237	0.11387	0.41877	0	0.275687	1.98447	0.324964	0	0.941261	1.13511	1.04432	0.294721	0	1.00009	0.133405	0	0	0	0	0	0	0	0
Aco011023	75.2512	30.8992	44.352	-13.4528	0.885417	7.40594e-13	salmon	44.2902	40.5422	22.8442	44.0317	30.7782	19.0441	36.2854	20.4106	14.3963	57.9446	24.1568	11.8608	35.8833	21.283	8.93449	27.2473	14.1812	10.9843	25.4718	19.2907	10.8493	71.4282	36.5397	40.7437	11.8519	23.008	42.9699	28.637	13.8237	16.4795	9.49456	5.95352	6.79389	11.2571	11.4254	11.1058
Aco020679	18.008	4.11713	13.8909	-9.77376	0.603387	9.80006e-05	salmon	34.7878	19.9527	24.4596	42.1705	24.0905	25.8868	39.1055	27.4921	25.2061	42.9982	10.0492	27.4503	27.6529	6.35095	27.2136	26.6862	6.59175	18.6232	24.5768	8.5519	9.32334	24.4701	38.0502	21.0421	33.0744	15.5655	36.5559	54.2869	42.855	24.5707	2.40907	4.96119	3.11101	7.59409	14.0742	9.11917
Aco012713	63.0526	29.3054	33.7472	-4.44177	0.879334	1.69985e-12	salmon	49.8471	47.8618	40.1372	40.1286	33.1123	31.1942	46.4744	32.8017	23.5199	73.0419	33.7284	21.1603	51.0293	32.0593	23.0437	30.5663	22.9332	42.7845	54.7776	25.5663	33.4571	55.6855	48.9916	48.9242	14.0745	40.5683	57.7668	43.2015	34.864	24.5476	20.4647	21.6135	18.5471	36.6324	32.4979	29.363
Aco021552	30.9281	7.59715	23.331	-15.7338	0.737544	2.87389e-07	salmon	25.1378	19.3826	14.5759	25.4381	29.6432	14.5758	20.0205	7.91054	3.69239	31.0867	10.0463	3.32248	34.5551	13.0753	2.99616	42.5268	5.81408	2.50168	19.9091	3.51747	1.63957	16.98	17.5502	13.0818	10.9459	1.93076	11.2543	13.1965	7.05113	5.67556	3.92868	1.31216	1.59493	11.4666	17.5148	10.4622
Aco001699	96.6072	42.1879	54.4193	-12.2313	0.931777	1.58498e-16	salmon	29.6293	24.0899	16.2653	31.7491	17.2809	10.148	23.2364	12.8571	6.40545	31.0312	11.2471	5.79339	18.9195	9.89637	5.03651	21.1927	8.66595	5.48378	23.0978	9.95336	6.78175	18.7283	22.9367	12.6839	8.16089	7.09588	22.7089	14.7507	6.54564	5.69614	6.96708	5.06793	5.56948	10.0805	10.7302	5.92071
Aco004707	68.5408	28.4309	40.1099	-11.6789	0.857133	2.51111e-11	salmon	55.0148	55.2369	45.5965	50.547	46.2994	42.2514	50.6511	40.7129	33.1605	65.3457	38.7895	33.6242	54.5129	41.0088	33.8045	43.1511	36.2178	40.5065	45.093	52.2355	49.4038	51.1494	53.5877	53.5823	28.2822	52.7629	51.318	37.9586	29.1787	29.3482	26.0768	27.0915	25.0916	43.4582	41.6701	38.1563
Aco006872	1.82507	0.853209	0.971864	-0.118654	0.562393	0.000357029	salmon	1.29092	0	0	0.695358	0.345085	0	0.404065	0	0	1.35407	0	0	0.302913	0	0	0	0	0	0	0.238685	0	0	0	0	0	0	0.680485	0	0	0	0	0	0	0.396075	0	1.16964
Aco008966	12.5852	3.64619	8.93896	-5.29277	0.682426	4.55293e-06	salmon	6.27547	8.49323	4.26947	3.90134	3.83385	3.3295	8.15637	2.80357	1.94638	3.28659	5.23578	2.5973	5.45404	4.54988	2.2355	4.30044	3.05022	2.94453	8.29451	0.992678	0.66702	2.6974	7.64036	8.02744	2.19417	5.45999	7.65894	5.16729	1.16839	1.56446	1.43968	1.65823	1.77295	4.12829	4.41032	4.91866
Aco012201	64.3478	24.3609	39.9869	-15.6259	0.879692	1.62068e-12	salmon	93.2987	66.3666	76.5638	75.3795	60.4487	66.2416	87.1332	54.5329	56.8597	99.0378	39.4476	53.3508	69.7491	38.8327	48.8992	60.7018	28.496	49.9053	77.804	36.734	39.4683	73.9103	88.4374	81.3354	43.4074	65.1526	91.9021	72.8468	61.0245	48.4845	32.4606	40.4419	47.1779	48.2662	57.3249	45.7948
Aco002631	2.37605	0.70874	1.66731	-0.958573	0.394012	0.0174199	salmon	11.3514	4.57887	8.3099	10.9406	12.2179	8.3317	18.4145	20.0148	12.6557	15.6468	2.70814	0.94036	5.71693	1.63922	0.325511	1.942	1.77515	0.905397	5.12093	0.497456	0	0.600817	2.2596	2.15051	17.1637	0.145483	5.65388	12.539	6.62946	7.70938	0	0	0	0.984837	4.24757	0.875432
Aco013538	50.6907	19.3015	31.3892	-12.0876	0.842323	1.19125e-10	salmon	28.8519	25.5552	19.1995	28.144	18.7799	15.4858	23.8094	15.8018	13.9146	30.249	18.8699	10.9978	22.2555	15.1377	12.3779	19.8576	16.7849	13.4223	19.4665	17.4408	17.4095	20.1315	20.3551	20.1012	9.58469	20.3076	17.1583	19.3359	12.0948	10.1436	10.6937	10.0904	11.0937	20.4072	20.488	19.5336
Aco004659	28.2067	8.7709	19.4358	-10.6649	0.730427	4.2612e-07	salmon	24.5562	29.6616	38.4524	24.4736	19.2721	22.8053	25.6439	14.3648	17.6929	34.7007	15.961	15.0789	15.2305	16.8325	10.3628	16.0164	9.68878	10.8005	27.1625	6.88566	14.9456	39.8082	17.0461	29.5485	7.94912	20.941	21.5414	14.2856	8.47897	10.997	3.67616	4.87266	7.76778	10.3976	11.0351	8.98274
Aco001950	97.44	26.117	71.3229	-45.2059	0.894737	1.8854e-13	salmon	14.3302	7.8965	5.82104	18.2653	7.42671	4.15871	15.5247	6.07802	4.41484	16.9746	4.42449	5.026	15.0684	4.13781	4.83967	13.2262	3.84901	4.27476	15.1452	7.66988	4.70184	9.92691	9.91828	5.55159	2.80205	6.77397	12.9291	10.9615	3.87682	1.26852	0.51935	0.05153	0.253306	4.87498	6.94263	4.26855
Aco003023	15.6282	4.59873	11.0295	-6.43078	0.67107	7.48514e-06	salmon	21.2831	19.9849	15.4611	17.2403	15.7474	12.3615	20.7991	14.555	8.51866	21.0808	14.366	6.77956	26.0381	24.0066	7.41214	16.9078	18.4298	10.3183	19.175	26.0791	13.9018	17.1119	23.8764	33.811	10.9065	13.252	24.0446	12.2538	10.9154	7.23697	17.0579	8.4366	11.0876	17.4554	11.0488	12.3513
Aco022206	29.6711	8.6366	21.0345	-12.3979	0.713251	1.05017e-06	salmon	184.701	224.168	188.28	188.679	139.599	161.748	229.612	173.075	185.628	317.131	157.959	128.141	180.283	106.045	123.187	152.152	79.5669	113.955	153.562	56.3277	56.7573	358.237	324.327	229.185	139.387	136.964	318.862	200.21	103.688	66.7753	66.7561	92.6255	82.0374	274.694	277.655	178.364
Aco012479	93.435	29.364	64.0709	-34.7069	0.831592	3.3429e-10	salmon	139.682	127.072	124.622	106.754	90.3085	102.535	134.812	89.9235	79.3784	157.138	74.1926	80.4652	135.044	80.3745	78.2888	100.695	70.9006	94.5532	149.971	92.3457	81.4547	166.884	149.862	136.825	60.0861	120.065	165.006	109.009	117.571	81.5777	51.5515	69.9126	71.2331	129.93	126.311	103.151
Aco018534	21.2287	9.99356	11.2352	-1.2416	0.725874	5.44743e-07	salmon	321.376	197.129	48.9615	647.087	294.006	18.2567	125.613	113.392	12.1568	305.83	66.0867	16.658	103.465	23.6133	10.2902	58.9269	33.6265	8.15292	35.8606	52.6386	2.41005	8.84747	216.282	181.758	0	0	358.397	192.246	23.2917	12.0292	0	1.43684	1.97792	5.19699	20.1207	27.1654
Aco002412	40.9118	11.7887	29.1231	-17.3345	0.796834	6.09586e-09	salmon	20.8397	19.2416	15.5457	18.7426	17.3161	14.914	17.8582	22.7595	18.9931	25.2809	13.5121	9.86958	19.8247	13.5003	7.67206	19.3585	14.5336	7.18762	19.7724	18.9937	5.51385	16.2248	24.1686	15.1668	17.0801	6.49362	28.7799	11.8603	9.34644	12.3725	3.85752	2.97112	6.65715	10.3941	13.4999	10.6897
Aco008225	28.5453	11.1924	17.353	-6.16063	0.733181	3.66417e-07	salmon	14.9348	13.7565	12.1075	12.412	9.89722	8.70663	12.2122	8.83863	8.27004	18.5352	8.8773	9.64677	13.5897	11.8804	5.64018	14.9735	12.7376	8.05691	11.9861	17.522	9.69731	15.8551	17.6131	21.0162	11.1077	15.3438	17.8148	10.7838	8.81084	9.82802	7.23262	4.40686	6.64233	12.1384	13.9059	13.7255
Aco025812	43.5961	24.8423	18.7538	6.0885	0.711396	1.15317e-06	salmon	4.31942	0.846126	0.394509	8.22759	0.874878	0.477276	25.8022	1.079	0.0915	47.142	1.83048	0.331762	16.9164	1.20162	0.234697	9.3649	0.707953	0.111488	3.04954	0.872462	0.094186	4.12088	4.44118	0.604647	0.249423	0.559283	33.9357	0.672856	0.112539	0.327445	0.121172	0.032152	0.0602	0.24439	0.13898	0.203276
Aco020866	44.911	18.5901	26.3209	-7.73073	0.84201	1.22893e-10	salmon	29.9503	27.8834	26.4565	30.535	25.4227	20.0955	26.1347	19.5216	17.798	40.632	21.8247	19.1439	26.3517	17.0982	14.4343	28.4137	17.7004	14.9127	26.9868	13.3707	11.2635	33.7821	29.4011	32.1832	13.7989	26.2357	29.401	29.1125	16.0654	13.5551	16.3104	15.43	24.344	15.7661	16.8688	10.3311
Aco014492	35.1042	6.28486	28.8193	-22.5344	0.708582	1.32716e-06	salmon	62.2429	58.873	64.5732	55.2588	39.9032	54.2328	68.2986	54.6584	35.3384	72.3316	42.3786	43.7631	61.8683	42.1695	31.2098	42.5566	35.9098	34.503	61.6386	22.9481	29.0945	88.4483	68.5475	52.8659	35.7132	52.2823	72.2563	64.4075	49.6996	47.5776	47.2966	45.8852	52.3616	45.7055	48.332	45.3496
Aco025809	30.5329	18.1491	12.3838	5.76533	0.734308	3.44282e-07	salmon	1.22892	0.346723	0.08951	1.07391	0.174073	0	1.68949	0.185038	0	3.93357	0.322201	0	2.67995	0.356505	0	0.625484	0.098631	0	0.26808	0.460706	0.093209	0.35547	0.451958	0.05633	0.197421	0.07348	1.19828	0.082128	0.230954	0	0	0.00914	0	0.12883	0.097822	0
Aco017895	98.0237	18.9141	79.1096	-60.1955	0.762237	6.60914e-08	salmon	49.9418	48.3227	42.7979	43.8716	44.1548	42.2226	55.3786	47.9366	38.3281	63.3564	44.58	37.3187	57.8962	50.621	35.0408	48.5467	42.17	44.9138	70.5471	57.1632	42.62	78.5147	62.6597	54.8835	27.4784	56.5424	62.2764	54.0513	39.4922	29.8757	27.601	25.1986	27.4213	47.1018	43.6228	42.1356
Aco005469	39.3961	25.0794	14.3167	10.7627	0.720903	7.08423e-07	salmon	4.80757	0.5094	0	7.24191	0.545689	0.13862	16.9623	0.398518	0	36.4408	0.326993	0.106352	10.5411	0.685742	0.12396	5.58003	0.243078	0	1.72419	0.14808	0	3.46851	3.33433	0.196299	0	0	22.7313	1.44373	0.677984	0.19458	0.068242	0	0	0	0	0
Aco016191	60.4515	19.5099	40.9416	-21.4317	0.832785	2.99142e-10	salmon	102.908	89.3541	80.6382	90.4401	79.036	74.7869	84.0142	74.0798	51.5008	120.387	74.6603	56.7592	89.7398	80.6466	44.1331	62.7262	58.0647	41.9955	129.631	41.8931	19.5457	60.2307	105.576	129.851	77.01	66.0591	105.871	55.051	35.7843	33.1449	12.2629	10.4424	11.056	35.5894	51.6805	32.496
Aco007047	74.5069	23.3677	51.1393	-27.7716	0.86133	1.5647e-11	salmon	74.3612	57.3861	27.3641	62.5123	37.0324	24.2049	50.9873	22.3942	17.4237	61.8973	23.9385	14.627	48.4407	23.8768	13.8366	59.2156	16.3944	13.9474	72.7961	35.7413	21.2428	23.7536	64.249	34.4605	12.0601	22.9937	63.3656	21.0992	14.8808	13.2923	4.09349	6.27446	4.9086	49.977	32.2238	35.6935
Aco011848	30.1315	10.0265	20.105	-10.0786	0.758022	8.5978e-08	salmon	57.0582	54.8597	54.4862	48.5884	51.5737	50.7299	44.6682	50.0505	43.1404	63.1268	41.9698	34.9638	54.8169	47.6535	38.8637	39.0983	39.8743	40.1363	59.6862	48.6058	44.5914	45.0847	51.9669	56.2324	40.8146	47.4118	57.3294	48.5775	50.1892	47.2297	36.3715	28.9462	29.6255	49.2747	48.4118	50.8557
Aco001583	72.9299	25.2372	47.6927	-22.4555	0.883386	9.82271e-13	salmon	24.2982	17.6938	21.6829	29.4291	20.6135	19.866	22.4333	18.54	9.02884	31.8585	9.71301	10.3819	22.5969	8.82282	7.66577	16.1632	7.67615	4.11706	14.2452	10.9972	2.59768	11.5767	16.1825	26.5023	9.14418	7.28064	22.7798	13.9182	4.88779	7.0369	0.164273	0.312927	0.072401	6.12878	7.3485	6.38009
Aco022870	40.9577	11.8013	29.1564	-17.3551	0.750976	1.31931e-07	salmon	28.6388	29.2603	25.5792	27.1825	23.8531	22.4391	30.5008	21.6111	18.0699	33.8069	17.7868	20.446	33.9576	28.078	18.8534	17.6948	17.4145	21.6684	33.6794	16.9623	11.2561	41.2584	35.2695	27.1667	15.0133	31.6369	34.7699	27.8691	24.5616	15.8623	24.0903	20.6689	16.7556	23.4688	25.7323	23.1955
Aco005462	19.7489	7.29908	12.4498	-5.15072	0.738471	2.72767e-07	salmon	94.3642	54.7153	71.0327	90.7569	45.4619	53.6394	92.3093	38.1338	71.3088	110.349	55.7159	64.3167	77.6756	45.5091	66.6133	66.5354	47.3647	63.1729	76.2915	76.2884	76.5008	77.0911	76.1912	77.248	46.0508	76.7771	82.1439	62.1889	37.5618	34.1781	41.0371	22.6783	34.5296	82.1147	62.8094	68.6132
Aco010515	22.816	4.79221	18.0237	-13.2315	0.711256	1.16129e-06	salmon	12.8709	10.6476	13.1073	10.8455	13.8343	9.61575	13.6252	11.6428	8.59911	14.9326	12.3107	12.1469	13.6525	10.1401	9.85826	11.7999	7.31293	8.30249	14.9429	10.2121	9.52335	11.7942	11.8929	11.22	8.9228	11.0544	11.9775	7.81562	6.32763	6.5857	8.38567	6.27076	8.15658	5.8728	6.15996	6.23918
Aco005508	73.7936	26.8437	46.9499	-20.1062	0.878998	1.77735e-12	salmon	52.5464	48.9743	39.3778	49.4282	36.9527	38.243	46.9749	29.7521	30.0139	46.6489	28.585	24.0096	36.2006	25.3338	21.2481	32.7189	25.402	24.8879	36.1404	32.5647	27.5613	34.7703	40.7755	47.3733	15.719	35.8511	42.8135	31.3944	14.5234	15.5916	12.8086	16.4986	18.4249	29.2419	33.1162	28.0083
Aco005009	32.7281	9.84505	22.8831	-13.038	0.661849	1.10366e-05	salmon	2.35442	0.85531	0.503111	4.15483	0.407539	0.913908	12.2642	1.62929	0.128472	17.2768	0.982257	0	6.90917	0.921971	0.135881	4.97382	0.857838	0	1.91646	0.63659	0.066884	1.78674	8.15237	0.127566	1.02397	0.158723	9.01362	3.66299	4.03562	8.83811	0	0	0.08341	0.131437	0.394852	0.707079
Aco005329	28.2941	7.43512	20.8589	-13.4238	0.708022	1.3646e-06	salmon	42.1166	42.6872	44.275	45.6165	40.5006	40.2774	49.1263	31.5434	33.1572	48.6344	31.857	39.6455	52.0028	30.461	31.7835	41.9025	41.5153	46.8166	44.9989	49.7706	43.9847	51.958	58.0745	47.8547	20.9978	53.762	61.3257	29.5969	31.0353	27.5365	29.8199	16.4152	18.7816	42.3022	38.7493	35.8579
Aco006523	74.4598	33.8081	40.6517	-6.84363	0.90215	5.7769e-14	salmon	36.3964	38.0035	31.822	33.8938	31.8214	26.7696	37.2413	22.5885	18.0381	46.1937	24.5584	19.2006	39.876	29.8154	19.9128	22.4011	21.7588	22.9019	34.2479	30.7513	26.7383	32.6223	32.959	33.741	16.5237	34.6205	37.2365	23.2919	20.8699	19.7341	15.4619	14.9705	13.6846	24.4453	26.4591	25.309
Aco001986	48.8655	11.6731	37.1924	-25.5193	0.789639	1.03752e-08	salmon	31.5378	30.8588	15.0767	29.9972	23.8712	12.7355	28.899	16.2003	11.9539	27.1988	19.2921	13.9331	23.6245	14.7321	13.4242	42.4216	10.2272	16.7522	32.7093	12.653	5.78051	13.7893	30.2158	19.0589	5.02074	18.6714	25.7075	6.7193	1.56854	0.506741	0.299221	0.136447	0	5.43295	6.71902	7.20644
Aco003865	98.0686	30.0152	68.0534	-38.0382	0.86955	5.91542e-12	salmon	16.3906	15.5769	14.2205	15.1619	13.6011	11.5996	17.7347	10.1522	7.91888	23.4386	13.2275	9.62615	23.2481	10.9083	9.02482	18.2468	7.50317	8.70529	15.8934	9.41486	6.78032	29.6942	20.3731	22.613	9.0822	15.4635	22.3011	16.4875	7.57681	6.9247	3.35136	3.30002	2.9012	7.65654	7.45379	7.82209
Aco006403	63.7317	24.8547	38.877	-14.0223	0.819597	9.75943e-10	salmon	34.5052	36.6997	26.8186	29.2145	28.1143	24.5189	26.7181	27.7774	18.603	43.3136	25.6734	17.83	33.3518	28.8792	14.5348	31.3855	25.0228	16.5534	32.0311	39.0939	25.4599	33.9965	31.844	38.5017	18.7065	31.4523	33.3927	30.3797	17.2917	17.428	15.408	14.657	16.2096	27.5317	26.2893	26.507
Aco003315	53.6549	16.5259	37.1291	-20.6032	0.812095	1.83398e-09	salmon	21.3899	25.3817	16.1643	26.0298	21.4834	12.0502	21.257	10.7768	5.69385	28.7398	12.9662	10.7062	23.7421	15.7327	7.06468	21.7752	9.05043	4.13792	21.4125	8.69865	5.2798	41.5816	15.4765	21.4218	11.559	10.7573	19.8579	14.4005	6.55409	8.9836	9.93234	5.23534	6.61401	6.7399	9.24289	11.9696
Aco005496	109.004	20.6802	88.3243	-67.6442	0.753633	1.12448e-07	salmon	50.8881	47.5786	50.7619	45.0527	40.6363	42.5691	55.9205	42.3755	43.3145	65.3469	35.3405	37.4839	59.5891	42.6967	35.4786	44.419	35.5829	41.0881	67.4177	52.3441	37.0181	70.853	72.9807	57.5015	34.8807	60.1568	74.5291	47.8468	42.2352	38.2293	32.2608	28.6272	29.508	62.9939	55.4376	52.4326
Aco006913	32.9362	13.7003	19.2358	-5.53552	0.813457	1.63899e-09	salmon	15.4568	15.1064	6.87662	13.9003	12.2553	5.60236	11.9187	7.27562	6.40095	13.5013	5.07556	6.15475	9.69614	4.23912	6.45224	11.5549	4.65964	6.27765	9.31897	6.9886	5.34685	6.55108	9.19112	10.1195	7.49413	5.51861	11.05	4.63977	7.6436	4.93792	2.66537	4.84754	3.17105	4.6348	7.78844	5.22128
Aco006804	62.7237	23.1017	39.622	-16.5203	0.8154	1.39389e-09	salmon	24.3737	24.2125	22.5945	22.7239	20.6838	16.6186	23.4251	17.1961	14.829	28.4943	18.1108	15.0046	25.3679	19.0737	14.5454	19.868	17.2958	16.2473	31.1926	22.3279	17.8561	25.0501	23.5124	24.2827	14.6811	22.8142	22.1806	16.4609	16.5638	12.7873	14.8288	14.3853	17.091	22.664	22.0883	19.7005
Aco002123	48.2254	17.2568	30.9686	-13.7118	0.835886	2.23178e-10	salmon	22.9168	9.9744	13.0984	23.7564	12.0451	11.2055	19.0011	11.241	10.423	19.825	3.12854	5.21198	14.6661	3.88859	5.93637	13.5687	2.36247	5.30405	14.0802	15.2124	6.33156	21.1437	17.6053	9.78949	12.3869	7.09377	19.0847	15.9001	10.2102	7.44273	1.91544	2.33468	1.44392	8.12227	13.5956	7.441
Aco013405	9.9995	4.28774	5.71176	-1.42403	0.568833	0.000294683	salmon	2.86619	2.18136	1.18111	6.85638	3.7361	2.02405	4.3802	0.887227	0	1.10923	0.72941	0.721024	0.658641	0.363441	0.571098	0.198924	0	0.304018	0.287416	0	0.105007	0.710157	2.25944	1.00583	0.789075	0.264689	2.88214	3.81324	1.55934	0.756627	0	0.108609	0	0.118615	0.269786	0.24438
Aco024430	47.7935	11.9127	35.8808	-23.9681	0.73372	3.55684e-07	salmon	22.0478	17.781	19.8752	16.3502	14.0453	17.2567	23.3817	14.0032	11.5461	35.1071	13.864	10.7453	29.9505	13.6104	11.6381	25.9432	14.2852	15.6081	21.0403	18.4277	18.5157	30.0527	24.8175	25.8273	10.159	20.7849	23.6224	22.0786	14.2275	8.77342	4.9469	7.09946	7.64267	27.3452	28.9103	24.5197
Aco012822	17.3763	5.14635	12.23	-7.08365	0.630727	3.73104e-05	salmon	8.03564	5.91927	2.25169	13.1563	11.12	4.27529	9.23807	4.71221	0.96857	18.4843	7.76889	1.55106	14.8096	5.63242	1.38708	15.5069	5.86918	1.25941	3.91711	0.762752	0	2.80569	4.30756	3.96652	11.2417	0.571731	3.28901	9.95691	2.7236	1.84014	0	0	0	0.903296	0.708981	0.488182
Aco001356	27.104	7.57623	19.5278	-11.9515	0.743219	2.0804e-07	salmon	102.467	105.295	108.252	93.1967	87.4497	95.8033	84.9525	63.0645	52.4289	94.3732	70.0122	54.0497	89.7146	68.1793	60.2454	109.569	56.346	74.0528	113.251	54.1781	79.3543	86.5016	97.0687	78.0982	49.9548	67.8179	88.9234	80.5203	71.0818	59.0171	56.7319	48.615	50.5901	76.8431	74.915	84.0433
Aco029516	3.11542	1.37273	1.74268	-0.369948	0.464579	0.00431001	salmon	1.40341	0.105528	0.543217	0.870265	0	0.556985	1.50899	0.43122	0	0	0	0	0.149593	0.196411	0	0	0	0	0	0	0	0	0	0	0	0	0.754609	0	0	0	0	0.17488	0.124419	0	0	0
Aco001121	84.1853	32.6399	51.5455	-18.9056	0.8936	2.24274e-13	salmon	105.453	91.4734	72.5472	102.581	64.8059	69.0587	91.7636	46.621	23.269	83.0429	36.1005	24.2488	75.8037	46.2112	22.5863	59.941	37.5131	24.8595	70.2658	23.8602	30.4048	95.4152	74.8584	57.9226	26.304	32.4485	75.7864	30.7643	22.7577	35.8793	11.0838	5.70305	5.83948	24.997	29.5017	28.528
Aco023690	12.023	5.40087	6.62211	-1.22125	0.499564	0.00192219	salmon	6.15869	1.12035	0	8.83921	1.00967	0	0	0	0	0.280109	0	0	0	0	0	0.3301	0	0	0	0	0	0	4.721	0	0	0	2.70229	0	0	0	0	0	0	0	0	0
Aco027354	42.5937	9.52669	33.067	-23.5403	0.775138	2.85391e-08	salmon	19.7211	13.4883	15.0512	13.4771	12.257	13.1695	17.2036	14.2262	13.8008	19.8854	8.67887	10.9025	15.087	9.18483	11.016	16.8028	9.74011	10.8938	18.1742	14.8366	8.43824	11.2495	18.0807	14.771	12.5677	12.4224	24.8465	23.081	12.0669	9.64719	2.60423	1.99123	3.62514	11.0628	13.2855	11.4314
Aco017301	28.5061	9.69493	18.8112	-9.11628	0.742809	2.13009e-07	salmon	9.72239	16.8745	10.4795	15.9286	18.6334	11.1555	19.6029	21.5959	7.90116	26.8897	13.3828	3.41609	19.1981	10.7268	1.82183	15.7902	9.02479	1.76887	8.5357	7.48714	0.871477	2.91561	18.9788	8.02014	8.71009	0.451673	15.4817	5.89333	1.35781	2.85483	0	0.260915	0	2.84453	2.37676	1.88628
Aco021932	3.22343	0.70205	2.52138	-1.81933	0.50719	0.00159357	salmon	40.7777	36.9847	38.2258	38.1441	33.0325	34.7269	38.5677	32.3717	35.8566	34.1938	23.3384	28.0259	27.4083	30.3157	28.497	20.1609	25.559	35.7383	27.1018	34.9726	21.7506	27.3356	40.8527	29.5389	30.1816	50.5093	51.8369	27.6222	20.1705	20.4127	25.118	25.4795	27.0051	27.3653	28.3609	23.3554
Aco003112	61.2098	25.9121	35.2978	-9.38572	0.832782	2.99226e-10	salmon	23.4263	18.9909	13.523	17.9431	15.1264	8.21308	14.2679	9.17529	5.62147	24.0303	8.28334	4.3019	14.0002	13.3194	3.86377	12.1535	11.2309	5.14995	16.9255	21.7762	8.24726	17.0276	22.2958	23.1764	8.79537	11.3053	15.3353	11.8909	6.91758	5.46007	3.30771	2.48998	4.10342	15.4091	13.3604	13.6706
Aco012465	51.1784	24.418	26.7604	-2.34244	0.878573	1.87996e-12	salmon	113.386	82.2304	79.3199	119.855	76.8005	65.0036	106.794	50.9805	63.7098	148.07	46.1319	56.3974	89.2275	43.9911	57.6417	95.8385	64.8551	77.3341	83.2705	86.9094	69.1964	102.32	99.1717	101.758	45.2752	105.307	118.867	89.2151	76.6385	39.2184	27.4006	32.0548	39.1643	79.0315	79.1312	58.9843
Aco020182	32.7041	13.6649	19.0392	-5.37435	0.772783	3.34025e-08	salmon	39.355	32.8185	24.4977	40.4664	38.1524	23.7469	35.1353	32.496	22.5817	43.5939	16.168	16.4718	32.4927	16.2369	16.2496	18.6463	10.7252	12.8779	23.4975	22.1061	9.44435	20.2168	32.4038	24.5193	32.1146	15.761	37.165	44.7852	24.0708	25.1865	7.76477	4.49345	5.56937	15.3376	17.3574	12.0079
Aco005648	69.6795	35.332	34.3475	0.984515	0.888791	4.57685e-13	salmon	92.9894	77.9408	64.9736	83.2211	58.2839	48.9312	75.0944	50.7953	45.0968	99.9817	39.6964	40.0745	64.8172	45.0114	40.8497	44.7137	39.8941	45.9049	62.1972	88.7029	48.2017	80.366	75.8365	79.0857	36.6554	60.0319	83.4923	54.7273	36.1724	30.5218	27.9126	22.0013	24.731	56.721	46.788	54.7488
Aco013569	70.244	22.5783	47.6657	-25.0874	0.850254	5.28323e-11	salmon	41.6407	48.3681	41.5565	39.0691	38.6708	46.7692	43.6144	38.2365	32.4377	52.5913	39.6341	27.421	50.9958	43.8215	28.1567	44.0601	35.5884	30.906	44.5942	35.5534	29.4378	44.3277	47.3164	51.5519	24.1564	35.7707	45.8241	34.5312	31.0961	27.5273	17.5421	21.726	18.8737	31.7292	32.2137	33.0875
Aco018989	43.4419	15.0559	28.3859	-13.33	0.791228	9.242e-09	salmon	37.9395	37.859	21.6539	27.8448	29.7481	18.3966	30.2039	22.2199	10.1539	39.4411	24.4547	8.71905	32.1443	31.0155	11.7826	24.0503	22.4442	18.8557	32.8295	25.4643	16.996	32.7065	30.4882	41.4307	17.626	28.2296	27.2285	21.8708	19.4366	21.7828	23.2731	17.0219	16.8542	21.7892	23.2719	21.1037
Aco012033	24.5872	7.63834	16.9489	-9.31057	0.735854	3.15934e-07	salmon	167.768	130.076	92.2718	203.471	134.887	96.0066	314.098	95.643	85.096	216.469	48.2924	43.4844	165.068	39.0054	93.9179	146.039	38.7833	64.8795	67.9187	35.4247	44.0237	73.5022	175.159	204.85	245.031	120.096	223.64	76.7915	85.8396	69.042	0.769208	1.89871	0.138502	19.1531	47.5735	20.7739
Aco000087	55.7687	14.9073	40.8614	-25.954	0.797902	5.62311e-09	salmon	38.1893	27.428	30.1568	36.7978	25.8379	27.8789	41.6235	19.2416	23.2093	48.3125	20.9424	25.3064	39.4221	19.5359	26.6543	32.7948	18.9319	23.3435	31.4862	20.1172	20.4022	61.3265	31.9977	39.6906	17.2881	35.4467	45.9009	43.4738	27.4082	21.0155	15.2793	14.5767	19.2699	23.0851	25.6469	25.4228
Aco010945	162.77	34.4881	128.282	-93.7941	0.912153	9.99452e-15	salmon	61.0719	54.0691	42.0812	61.5925	49.8756	37.3706	71.7262	40.9053	25.8513	83.8402	31.6508	22.8948	64.6293	36.2874	18.6688	62.4547	26.1512	23.3122	58.6985	40.287	15.8395	70.8513	80.0885	51.5878	36.1733	36.5764	80.2219	64.6733	46.0933	39.0128	25.561	26.989	27.2975	34.6919	43.0043	40.3853
Aco014520	27.9395	7.98412	19.9554	-11.9713	0.634619	3.22726e-05	salmon	9.16553	5.75499	4.91299	6.29699	5.73118	3.92428	5.92566	1.7711	1.24501	0	0	0	1.24969	0	0	2.80078	0.155412	0	2.47346	0	0	0.404503	9.72571	0.604903	0.396363	0	14.1069	1.17723	0	0	0	0	0	0.573009	1.9134	0.767802
Aco008781	53.7963	13.7421	40.0542	-26.3121	0.796373	6.31147e-09	salmon	8.79862	3.42949	1.65064	7.07957	3.55383	1.9979	12.1644	3.60834	0.277139	7.09272	2.14633	0.29784	9.54954	4.63071	0.223629	8.51054	1.91382	0.059617	6.13521	0.545091	0	3.29648	6.27091	7.49352	0.169548	0.065575	2.99688	0.379462	0	0.544615	0	0	0.106766	0	0.46616	0.314753
Aco003076	11.6173	3.88176	7.73549	-3.85373	0.673277	6.80739e-06	salmon	13.2663	11.2796	6.26155	9.35288	10.4166	3.86234	13.761	5.48352	0.875474	23.4782	6.33827	0.6125	12.1907	5.23237	0.270378	6.84255	2.20815	0.553392	6.08766	0.787489	0	1.36852	11.0283	14.733	14.7837	1.4351	9.23404	10.0297	8.79882	10	0.729964	1.2098	0.810011	9.14023	12.3313	10.1647
Aco006191	4.4132	2.54668	1.86652	0.680159	0.540678	0.000663095	salmon	0.726482	0	0	3.02709	0	0	0.294938	0	0	1.19427	0	0	0.535036	0	0.169814	0	0	0	0.201146	0	0	0	0	0	0	0	1.41535	0.376359	0	0	0	0	0	0.542909	0.665723	0
Aco008126	21.5233	6.11388	15.4094	-9.29551	0.700062	2.01145e-06	salmon	186.921	151.767	146.421	203.93	132.869	137.035	143.818	128.142	150.468	144.437	109.152	145.103	138.306	93.0437	129.998	133.113	70.4353	113.449	99.1423	51.3048	68.6086	140.161	221.379	131.764	98.0738	135.331	279.126	62.7294	46.112	33.862	45.1473	65.7891	58.4524	101.929	112.709	91.3503
Aco014153	158.616	12.9438	145.672	-132.728	0.715824	9.21258e-07	salmon	16.447	12.3772	11.2301	24.9689	12.4011	10.6778	66.5366	11.1519	12.0735	76.0397	11.4537	13.6049	46.7531	14.0186	12.9792	52.1756	12.7799	15.3748	43.0719	20.1345	17.3501	27.3926	39.7988	12.3413	8.34454	15.1421	60.4814	23.0133	23.9435	14.3455	10.2761	13.0303	14.25	19.5809	19.6943	19.0279
Aco008088	91.3789	25.2312	66.1477	-40.9165	0.85736	2.44875e-11	salmon	41.662	36.7895	28.9728	38.1108	27.4028	27.0938	40.3005	22.3098	27.8621	53.7624	23.0305	26.4138	36.159	20.6632	25.7816	38.2908	19.2692	24.029	49.5192	26.9855	30.014	51.567	43.5458	33.5388	19.6832	31.9816	37.2553	25.8466	21.63	18.9912	6.46668	10.9404	12.6102	30.3381	27.9316	31.9851
Aco007328	65.3101	33.6419	31.6682	1.97376	0.845127	8.98327e-11	salmon	40.4191	39.4692	35.9425	31.0258	29.6771	30.3762	34.5292	28.0238	23.9631	51.7625	29.1166	22.9175	37.3098	28.474	21.2232	24.7676	23.2193	24.0098	36.6766	30.7867	21.497	38.3957	43.0705	42.1208	17.5244	45.5946	42.6019	28.246	21.4085	18.0509	16.6316	16.9489	17.6254	36.7305	31.1932	31.4415
Aco005743	16.8781	4.3594	12.5187	-8.15929	0.651432	1.68478e-05	salmon	107.729	85.0024	48.361	93.4417	76.004	31.3775	89.3052	38.5964	13.6617	74.3668	46.9705	12.0606	71.8986	38.3937	9.86702	48.6435	38.9786	17.9337	39.8307	137.812	71.1882	52.2928	72.585	71.4026	39.4878	51.0057	83.4674	49.1778	26.2543	12.2788	19.7254	34.7319	25.2708	63.4201	47.7182	72.1119
Aco007575	15.5059	5.26837	10.2375	-4.96912	0.644977	2.17237e-05	salmon	41.5472	35.9069	36.4448	36.4495	27.6087	26.7493	35.3434	31.7334	28.8032	35.5226	20.4388	24.1308	25.9069	18.3757	27.2779	22.8925	20.8083	27.329	28.3027	47.0748	24.8053	35.2749	33.1729	28.5034	15.6966	35.3165	31.2178	25.2855	23.5619	17.085	13.8991	13.4938	15.3219	32.507	26.3987	25.5998
Aco006471	64.7205	35.773	28.9475	6.82547	0.892133	2.7978e-13	salmon	177.728	150.041	119.715	150.952	109.827	87.711	126.676	95.6573	68.4068	216.942	64.3117	66.9865	122.173	72.1538	55.1393	60.3125	47.6323	52.5419	96.1859	74.2339	43.8467	164.234	146.77	159.861	56.8575	112.742	186.077	144.237	58.0529	40.8234	34.2917	34.3854	31.2605	139.363	114.563	103.349
Aco000846	32.502	12.3357	20.1664	-7.83068	0.786939	1.25995e-08	salmon	32.7806	30.6001	35.3569	21.6954	22.7151	22.9973	23.0915	21.214	10.9214	46.3006	18.1409	9.48165	29.9987	22.5613	6.19744	13.0691	11.6984	6.50344	38.7307	7.77717	6.90715	16.0452	33.6308	44.9377	8.49787	27.6216	36.4852	8.8759	5.79917	7.18279	12.5216	11.854	15.1033	14.3268	15.1028	11.3481
Aco008440	35.3867	16.7786	18.6081	-1.82942	0.788424	1.13266e-08	salmon	15.0614	9.25183	1.73141	33.7427	20.8854	1.12687	36.4684	11.5236	0.539646	106.294	28.1066	0.167992	51.7461	19.5001	0	10.9728	5.21953	1.15299	11.682	0.680504	0.322795	6.8775	47.455	42.5052	0.417386	1.36135	70.3333	0	0	0	0.250471	0	0	0	0	0
Aco005412	6.7541	1.61196	5.14215	-3.53019	0.472322	0.00363055	salmon	158.201	109.541	84.8157	269.464	120.045	109.657	214.644	63.2494	36.0629	232.4	107.939	85.0593	186.027	98.2182	69.378	135.355	65.9338	35.6584	50.4915	28.2075	29.9888	85.1158	74.7982	80.091	203.609	24.6844	59.2923	169.867	118.056	250.11	52.324	21.0933	33.7588	46.8906	61.949	82.342
Aco025705	21.2747	11.1123	10.1624	0.949887	0.699596	2.05684e-06	salmon	12.6174	11.4601	7.18608	13.9451	23.8293	9.54518	18.1975	9.30728	8.48196	59.3505	13.0732	7.63819	27.8636	12.8246	9.93636	22.8515	9.43056	8.29486	16.9562	10.7755	8.30571	16.7432	18.4554	11.5354	7.95873	12.8823	15.3789	10.7635	8.07278	9.79884	3.80287	7.20245	6.02173	8.85541	5.24499	8.86879
Aco014883	15.7669	5.74385	10.0231	-4.27924	0.662283	1.08399e-05	salmon	13.3619	4.69362	3.59391	10.8	3.90172	3.66079	4.05907	4.17941	3.49185	3.23188	0.549861	1.1451	3.35698	1.07474	0.296735	3.53608	0.938382	0	6.20754	2.49317	0.988871	6.39366	4.79838	4.32753	3.44751	1.10677	3.59727	1.55476	3.4591	1.35498	0	0.320739	0.233558	2.80758	4.27867	2.95134
Aco009579	11.636	2.47079	9.16518	-6.6944	0.563415	0.000346407	salmon	141.279	103.261	48.8884	216.918	160.672	53.8748	274.586	203.817	171.759	395.242	208.328	173.786	290.789	192.609	222.492	243.945	185.369	220.78	173.067	175.188	90.7558	107.858	148.651	200.664	216.307	271.956	280.803	68.4879	32.3318	31.8929	17.5604	8.55563	11.1713	32.7942	34.6709	21.1698
Aco010152	135.76	43.1352	92.6251	-49.4899	0.925828	6.26719e-16	salmon	142.208	135.471	108.103	132.803	115.71	91.4214	147.602	94.0961	65.8617	159.404	93.6009	70.1528	135.692	96.1296	67.4981	120.074	82.8651	72.3573	151.878	86.378	75.3857	158.427	144.716	134.457	70.6946	104.741	151.997	126.824	111.291	99.5957	76.1038	72.1187	73.5528	93.1892	103.886	94.0229
Aco005320	62.591	18.6976	43.8934	-25.1958	0.848709	6.21241e-11	salmon	28.306	21.6617	29.0691	32.0495	26.1542	25.1122	29.2942	19.9356	15.8736	31.7994	22.0461	19.277	25.8796	20.449	17.5884	25.8623	20.4215	14.1388	25.2343	10.3741	14.2424	30.3658	31.1042	26.661	15.5913	13.7789	33.5132	24.4648	21.1064	21.0531	12.1448	9.00272	15.6512	15.4264	21.6609	17.9395
Aco000396	68.9429	29.9792	38.9637	-8.98457	0.89402	2.10399e-13	salmon	46.1066	26.6861	15.0952	47.9278	20.7291	11.3575	27.6751	4.37889	1.22585	48.6271	8.75923	1.19756	19.8602	8.78394	0.7559	10.0796	3.58736	0.774727	13.0753	1.71449	0.42401	30.3542	26.3579	35.267	4.72028	2.6529	24.9533	3.17791	1.43709	1.50749	0.528964	0.278775	0.069753	2.28201	2.41422	1.93233
Aco005077	12.8515	4.69243	8.15905	-3.46663	0.596567	0.00012301	salmon	170.698	105.38	26.4684	70.1854	74.3117	10.9329	19.8375	58.1347	3.23086	7.42582	12.2968	0.491743	10.4098	29.5641	1.20395	15.1071	33.1958	4.32166	24.4445	9.98675	1.37376	91.8266	108.908	8.67815	0.233603	6.66272	135.17	1.44046	1.15678	1.00069	5.30687	5.11813	6.585	19.9739	9.00858	7.39675
Aco000885	90.6351	25.9892	64.6459	-38.6568	0.888699	4.63824e-13	salmon	39.4444	24.3738	16.9207	47.5455	22.9302	20.0504	45.8742	16.8946	14.3509	45.2071	10.5824	13.0506	29.5012	11.873	9.22626	32.1809	12.8347	7.82235	27.3712	12.1191	9.01526	38.008	43.5798	27.1056	28.4068	15.7539	43.3178	18.6593	16.4042	19.944	0.557929	0	0	24.0758	23.637	23.8753
Aco001679	16.7088	8.03888	8.66988	-0.630991	0.567816	0.000303834	salmon	2.59891	0.981224	0.582469	3.5721	1.72145	0.821766	0.500587	0.130852	0	0.302645	0.114393	0.187795	0.557316	0	0.518396	0.20016	0	0	0.400649	0	0.202542	0	0.63099	0	0	0	2.90695	0	0	0	0	0	0	0.033914	0	0
Aco016383	10.8254	2.03893	8.78646	-6.74754	0.508266	0.00155143	salmon	2.08522	0	0.9846	2.56909	0.951227	0.82946	2.88492	1.91152	1.3726	0.322643	1.12125	0.643754	1.84836	1.65876	0.855707	0.258923	0	0.601967	0	0.24114	0	0	2.25889	0	0	0	4.73639	0.338485	0	0	0	0	0.458634	0	0.520171	0.302631
Aco018893	133.683	92.672	41.011	51.661	0.918929	2.69301e-15	green	387.111	313.564	161.835	339.329	266.103	124.27	87.6076	123.122	19.5258	376.285	204.548	25.547	132.347	156.105	13.6695	34.5787	69.8175	22.9256	9.23333	45.9462	21.8817	38.592	34.4483	367.033	79.7492	141.673	42.7226	150.019	35.0671	44.1211	3.8201	1.28603	1.37727	10.464	19.5517	12.3179
Aco000581	72.074	30.7954	41.2786	-10.4832	0.751409	1.28554e-07	green	122.469	122.795	111.104	100.07	93.1216	88.3798	83.7023	52.2767	29.2531	92.3908	60.8348	30.5461	77.475	66.9234	34.1053	83.0722	55.5444	42.3215	82.0253	67.7017	58.4131	63.7807	86.2613	90.7397	53.9365	53.0649	78.2402	41.9064	28.2017	33.3948	47.5395	17.7832	29.9299	44.8092	47.3306	45.0829
Aco027755	1.21976	0.727216	0.492546	0.23467	0.383431	0.0209763	green	7.11092	4.33179	0.898544	8.94619	3.82016	1.49241	2.23847	3.15694	0.336585	10.2552	3.73726	0.996674	6.09644	3.08361	1.39487	0.374293	2.87561	2.02223	0	7.6696	5.82566	4.19917	0	2.80625	3.18573	0	1.19198	9.25811	5.25739	2.99873	1.7777	0.676055	1.95435	2.48262	0.605059	3.70651
Aco029401	46.1775	25.3368	20.8407	4.49617	0.751417	1.28495e-07	green	69.8667	84.796	28.1816	53.1656	53.9823	31.4937	37.5365	28.3251	11.9261	62.0917	36.0239	25.9156	43.3217	43.0102	21.8897	28.6012	30.234	19.8824	30.0577	32.2255	15.0513	15.5224	24.7218	30.1193	18.8302	18.4167	22.0189	32.5919	30.5811	29.2112	3.50429	3.51704	3.17118	6.28427	7.05696	7.08727
Aco007333	158.259	113.234	45.0249	68.209	0.952572	3.85363e-19	green	1385.19	1763.56	726.19	1591.59	1368.15	656.68	517.364	689.853	283.507	1453.63	1418.87	279.047	685.594	1107.83	208.855	186.571	588.544	224.982	160.584	122.585	82.8989	247.018	250.561	1790.15	294.447	940.425	359.499	270.749	97.5693	152.331	148.355	50.7215	115.406	397.153	402.106	292.245
Aco031614	52.7795	39.2321	13.5473	25.6848	0.824787	6.19988e-10	green	61.7425	100.114	34.9766	65.7118	64.5596	32.5242	6.4211	39.7614	28.9565	21.7715	39.9116	2.54258	21.7781	44.3547	2.26139	17.1217	40.0336	5.50357	1.95431	2.97901	3.04468	4.58265	4.14321	143.944	10.4884	22.1149	2.67266	5.10259	3.1898	2.63034	3.36055	2.23349	3.33631	52.629	43.7657	30.5172
Aco022292	6.10868	1.60129	4.50739	-2.9061	0.575754	0.000238694	green	11.5906	15.4589	10.8515	9.92553	15.475	11.4452	9.84351	10.2159	12.2481	11.7764	14.7332	12.4598	11.3038	11.7388	9.08347	12.3406	10.0951	8.8376	13.8372	2.76609	2.19953	9.1458	10.5194	16.6939	12.7843	10.285	7.79118	6.88802	8.45063	8.06151	8.5762	4.53269	5.99822	9.14655	14.2482	8.4922
Aco018585	67.7843	29.1128	38.6715	-9.55869	0.762916	6.33169e-08	green	36.8875	37.9648	31.6366	35.8016	32.3773	26.9398	28.879	31.239	24.1079	47.7852	27.959	22.3334	38.7296	31.369	21.7702	23.3466	24.0699	24.3393	30.6091	37.4204	23.9492	38.5734	32.6178	43.3944	21.9858	38.5311	33.5691	31.5794	20.292	20.0285	16.9639	16.4444	16.6791	29.8433	30.1792	26.8204
Aco030263	52.6576	23.2325	29.4251	-6.19262	0.727253	5.05954e-07	green	115.714	218.553	131.472	148.766	167.158	120.542	19.1818	101.256	58.5503	34.7715	108.622	44.6649	31.4466	127.909	55.5948	5.22926	174.956	76.1984	4.21028	53.7168	104.671	23.6203	4.87161	291.714	55.0426	160.081	6.10205	29.4952	9.50983	30.951	9.11938	11.3495	15.3351	125.011	176.429	166.132
Aco013330	33.6306	21.4057	12.225	9.1807	0.740972	2.36662e-07	green	129.456	163.417	84.6122	120.388	198.521	63.4227	47.9551	120.655	48.0361	123.897	167.597	35.3248	79.8184	140.458	34.503	35.488	91.5514	48.9741	39.2812	63.9856	69.2388	71.4132	41.1567	178.856	37.3469	116.537	50.7548	92.6332	47.8078	30.5824	133.923	85.1195	97.3059	63.0531	41.5189	41.4041
Aco002591	92.3167	55.2437	37.073	18.1707	0.865008	1.0205e-11	green	49.2375	63.5218	57.6451	44.3879	57.1873	55.1455	35.8978	45.9296	22.7855	75.9867	54.9237	32.9095	47.1048	65.6639	23.4565	24.1967	39.6205	28.2077	25.2333	24.0764	21.6693	29.0611	25.002	54.5341	26.4487	40.7692	27.554	26.2878	9.11999	22.4611	16.1569	8.94711	12.3752	13.0126	12.1809	14.0109
Aco001231	14.9259	7.66022	7.26572	0.394501	0.68747	3.6252e-06	green	25.5936	36.8995	24.8072	30.6084	29.0343	23.4365	30.0093	22.4871	15.312	30.7196	46.0625	17.6499	32.3507	38.0483	16.234	30.3827	34.2672	21.4597	33.1958	35.2798	23.1565	34.8394	25.14	44.0041	21.5928	22.947	22.5896	17.758	20.1876	21.2277	18.4516	10.6022	12.807	24.8848	22.4526	25.9087
Aco004146	166.725	94.4495	72.275	22.1745	0.917024	3.93752e-15	green	205.471	183.74	160.95	170.345	141.335	134.815	99.9869	79.4257	53.9737	152.361	99.4798	62.9723	90.3586	106.202	56.4297	64.1028	75.5744	63.7789	85.8564	62.1962	74.7485	49.888	73.0412	169.34	47.0599	121.659	75.7192	59.6248	27.9671	46.8007	36.6733	23.4208	31.7085	48.6445	47.6154	53.2042
Aco002818	14.42	6.86216	7.55785	-0.695688	0.589183	0.000156434	green	718.901	1004.05	436.137	749.437	1115.01	589.791	578.75	634.594	119.179	978.12	1293.53	124.464	306.321	653.932	79.1356	160.448	240.641	63.7494	120.575	32.9638	7.23784	67.0248	425.753	320.532	135.118	27.4078	768.903	1194.05	361.517	188.794	9.12363	9.06018	9.39037	8.64982	18.4912	12.2257
Aco004866	77.6961	33.2607	44.4355	-11.1748	0.746937	1.6758e-07	green	76.9959	74.0455	50.6985	68.3964	60.0194	35.249	53.9678	43.6589	25.2226	94.1974	29.6141	21.7121	57.1058	28.1316	17.5616	27.8812	17.4964	17.9739	26.9701	46.1044	19.3628	39.8337	51.885	63.9598	22.1202	36.2099	57.5503	50.8648	18.211	17.5247	7.86048	6.7627	8.56798	16.0548	15.0479	11.7928
Aco012663	30.0903	16.1102	13.9801	2.13015	0.75023	1.37933e-07	green	260.763	266.964	293.013	298.455	263.113	280.096	223.992	182.23	154.916	320.468	218.648	216.094	257.041	232.04	179.279	191.111	220.074	206.186	147.594	285.355	310.493	149.235	163.277	318.814	138.421	257.435	165.827	191.798	154.797	162.702	125.006	123.52	119.818	105.159	108.817	123.981
Aco013101	102.727	82.7399	19.9876	62.7523	0.921494	1.59069e-15	green	297.361	329.592	139.635	287.492	211.068	90.997	116.398	106.252	62.9541	384.176	195.86	49.661	156.509	170.642	43.7554	62.7922	102.333	57.1994	53.0227	55.0537	48.272	54.2726	72.2519	358.435	40.5277	176.354	109.374	118.915	54.9441	35.3489	49.6792	40.726	41.0004	153.064	101.949	100.309
Aco009489	60.169	35.273	24.896	10.377	0.798923	5.20311e-09	green	109.734	77.4417	56.5256	60.4304	53.4297	46.1147	49.2397	37.7248	18.3324	74.0221	42.5414	17.087	55.5255	41.8477	17.3733	44.8307	27.8413	16.6121	30.1695	20.216	19.9228	17.9122	29.0537	71.9073	46.2403	34.8181	33.8994	21.2942	23.0029	39.6039	29.4139	19.5773	30.3929	27.8418	31.4766	28.3571
Aco002548	22.7967	14.8016	7.99511	6.80651	0.717683	8.37353e-07	green	84.7328	113.525	80.3943	125.076	164.872	89.4303	95.9261	84.8378	61.2703	278.382	131.308	81.6875	150.513	102.784	68.5426	107.579	89.6905	78.4862	9.20751	3.94319	10.8519	7.02852	10.5201	127.84	65.7224	128.857	9.07876	62.6583	39.4022	47.239	0	0.064463	0.11915	45.8259	42.521	40.8899
Aco009701	30.758	4.11852	26.6395	-22.521	0.520406	0.00113952	green	317.357	303.525	348.978	342.23	297.737	363.198	222.306	295.882	211.637	340.896	439.976	391.479	332.45	584.895	344.236	175.077	442.846	408.246	161.656	290.311	292.527	96.4084	120.101	444.408	311.979	328.343	119.062	244.558	216.642	379.095	300.167	110.977	168.092	255.733	294.799	366.388
Aco009633	98.7887	32.0507	66.7381	-34.6874	0.800762	4.51913e-09	green	119.264	122.714	96.2819	112.025	103.093	100.609	65.3993	88.5824	74.9891	107.204	73.0403	75.7619	77.116	63.8413	72.3347	45.384	47.2733	67.9466	38.4844	40.8172	29.4704	24.387	34.6276	127.661	68.9082	91.2169	42.7263	82.8891	57.4467	60.0322	7.7846	5.03222	5.11057	25.1245	37.7814	25.9082
Aco017022	61.5651	32.8604	28.7047	4.15574	0.787562	1.20502e-08	green	515.269	494.042	420.087	540.849	440.475	374.032	265.878	258.679	140.614	467.407	424.359	337.492	466.495	405.12	278.843	194.448	258.01	163.942	169.615	84.9278	127.069	93.7416	128.784	429.614	87.8058	380.005	121.463	241.628	99.5755	111.834	352.135	169.331	248.459	133.89	199.596	174.137
Aco012073	0.906656	0.546802	0.359854	0.186948	0.144659	0.39992	green	0	0.116553	0.25495	0	0.072847	0.052879	0	0.370271	0.292398	0	0.085567	0.039447	0	1.19915	0	0	0.101694	0.055082	0	0	0	0	0	0	0.105215	0.041779	0	0	0.117458	0.2078	0	0	0.068783	0.042785	0.103388	0.138971
Aco014294	40.3181	25.5394	14.7787	10.7607	0.747164	1.65355e-07	green	21.874	25.6242	9.44182	22.1443	17.8285	6.54976	10.0766	7.63553	1.00023	21.7052	17.2948	1.8603	18.4609	14.1184	2.10028	2.69227	10.4962	2.03641	6.10804	4.34413	1.37345	4.97886	9.71225	21.4344	0.931394	3.10719	11.8286	5.83072	1.80596	2.61364	13.2931	6.68053	13.1729	1.26917	0.521291	1.34351
Aco009597	2.98408	0.312357	2.67172	-2.35936	0.276922	0.102038	green	55.3073	50.4653	54.543	55.8211	49.419	57.2797	60.5463	48.4632	36.583	70.4242	55.8967	72.9732	62.0026	48.8351	61.6414	46.4115	49.3863	54.028	64.8695	29.6104	64.4473	41.2811	47.3547	68.2396	66.5919	54.5634	41.8055	65.4427	49.2061	90.063	49.7793	18.6894	26.158	34.1246	43.4231	52.3112
Aco004958	19.6431	6.44181	13.2013	-6.75951	0.583209	0.000189216	green	20.1138	22.2258	20.5059	20.4963	18.7136	17.3335	17.7902	16.7514	14.6515	20.0744	13.3905	14.8815	18.3377	19.9425	10.821	14.435	15.2543	13.8716	19.6724	27.7005	20.2766	27.0944	17.8099	21.8692	15.3925	20.1362	14.2927	13.7288	13.3926	14.6559	10.5424	8.08088	9.00595	16.0746	14.6018	15.1187
Aco008240	14.0794	4.55757	9.52182	-4.96425	0.587331	0.000166007	green	109.968	123.461	103.162	92.0119	95.9145	97.33	90.3349	79.7242	57.8789	110.178	93.5858	65.9312	110.725	106.842	66.5689	103.114	106.028	91.6454	163.667	113.7	106.923	82.0735	84.3113	155.92	78.5777	129.693	73.9001	72.507	86.058	87.4827	54.8851	42.8277	46.0178	119.374	129.036	132.865
Aco001319	32.3711	27.6949	4.67624	23.0186	0.763375	6.1501e-08	green	29.5713	110.569	37.1161	34.4085	112.595	36.6601	25.0838	61.3544	3.99445	80.5004	118.16	16.575	59.8825	166.292	8.12036	7.06088	78.6046	5.52691	0.494336	7.93048	1.37214	0.899871	0.569407	287.595	87.513	55.2969	2.24963	8.15249	2.03963	2.71973	1.76605	1.08739	0.383561	0.218388	0.118393	0
Aco001348	181.756	67.0748	114.682	-47.6067	0.857565	2.39339e-11	green	396.653	433.896	411.278	416.924	377.697	395.765	179.995	214.426	114.229	331.726	323.666	283.813	246.155	323.773	202.588	106.962	217.44	151.278	78.3953	111.423	145.395	85.0152	77.4471	372.065	199.169	288.281	82.3396	154.787	61.5138	203.353	123.406	26.2604	45.8941	82.3756	101.873	124.317
Aco005313	53.2254	33.2012	20.0243	13.1769	0.821136	8.54374e-10	green	1.98779	5.21946	2.59124	2.35643	4.55312	2.56604	0.739834	1.3304	0.306597	1.45293	2.5699	0.414232	0.686519	3.57931	0.119032	0.591286	0.934016	0.424028	0.683607	0.164234	0	3.32208	0.319056	4.91651	0.223759	1.45167	0.10923	0.404021	0	0.453527	0	0	0	0.127395	0.108526	0.213448
Aco002310	45.0819	20.7161	24.3659	-3.64978	0.724674	5.807e-07	green	103.849	106.45	79.6058	75.8227	67.604	61.8748	40.7423	45.6972	36.8571	69.2806	51.66	25.4872	54.1532	42.435	26.546	45.5971	34.0323	32.5121	56.4939	13.2845	22.5211	78.8102	75.3272	74.9117	27.4236	64.8625	52.3107	39.4917	33.3292	21.8288	9.73235	11.675	12.6022	67.4595	61.9269	65.5447
Aco008432	2.68591	1.23084	1.45507	-0.224233	0.489605	0.0024399	green	31.1024	31.2897	26.5993	22.6513	22.764	20.7243	21.4382	28.3872	23.6696	29.0856	30.5409	16.7759	25.9472	31.9011	19.0419	30.5025	29.8185	21.8038	29.6764	24.3211	30.5508	27.116	28.8174	32.4601	16.2768	36.0695	24.678	23.5984	28.619	20.9853	15.2588	22.8954	23.7386	30.0028	31.7231	26.4991
Aco007045	14.9855	10.8179	4.16754	6.6504	0.675437	6.19854e-06	green	1.78966	1.29049	0.325094	0.955731	0.636228	0.208461	0	0	0.197637	0.330098	1.54729	0.059473	0.663684	2.2358	0	0.211403	0.162257	0	0	0	0	0	0	2.39109	0	0.696413	0	0	0	0	0.237566	0	0	1.78103	1.11535	1.47556
Aco017826	9.79572	1.9085	7.88722	-5.97872	0.438924	0.00740582	green	38.0558	43.0876	52.0474	32.7422	35.1749	50.2342	28.3346	43.7322	38.5202	41.9459	39.5789	44.9883	42.9995	45.3937	34.2803	30.094	40.5159	41.5931	36.9318	45.3443	47.4696	29.0131	31.0021	51.8352	35.6672	48.3852	29.6684	36.9546	36.3738	45.7023	29.5842	30.5765	32.4264	43.2527	48.2813	45.8813
Aco003418	31.8264	28.6969	3.12946	25.5675	0.782408	1.73485e-08	green	170.577	155.482	64.0315	156.281	249.545	60.6725	88.7396	198.825	12.7489	333.163	426.524	35.3609	148.651	389.256	19.3152	71.7863	304.273	48.4913	72.7918	146.358	69.1678	39.4982	63.3324	480.905	9.8748	242.738	63.8959	26.7296	18.8344	5.07101	14.8407	37.9501	37.4871	80.3136	43.7502	82.7543
Aco021299	8.44241	0.501126	7.94129	-7.44016	0.372662	0.0251965	green	603.031	539.779	506.631	540.043	526.902	544.414	432.474	525.1	569.574	575.924	598.531	553.362	469.884	562.425	606.335	450.707	565.054	720.179	514.31	451.747	537.355	450.364	378.582	511.983	365.593	608.812	318.374	657.813	545.599	577.721	420.082	288.144	278.616	288.468	322.714	330.744
Aco000688	15.0649	8.80204	6.2629	2.53914	0.682851	4.46712e-06	green	1.92785	1.41976	1.44417	1.22221	1.37819	1.76412	1.65922	1.14122	0	3.94272	1.36237	0.991115	1.88075	2.20089	0.403891	1.25511	0.589749	1.35251	2.64945	2.52463	1.0047	1.24317	0.85904	4.72233	0.99314	1.71459	1.38934	0.963441	0.997328	0	0	0	0	1.711	1.1446	2.01234
Aco000220	5.64759	1.72141	3.92617	-2.20476	0.297242	0.0783154	green	58.0593	64.6775	55.5693	74.3382	70.5598	64.6212	37.6977	66.6028	33.5004	51.0573	94.991	48.0886	54.7653	84.0735	40.0948	44.0003	186.226	39.6348	31.0422	46.4119	103.719	19.0829	16.3336	60.0249	84.3051	37.736	12.6329	62.0349	19.348	58.6121	34.5747	36.9592	43.2305	67.4598	93.8868	87.8402
Aco017302	199.827	93.1339	106.693	-13.5588	0.907451	2.33689e-14	green	265.446	267.383	228.261	210.43	207.686	215.758	57.6952	109.253	30.2327	153.488	145.991	88.0879	85.369	194.862	55.7924	33.5248	116.814	55.9491	16.625	50.8248	79.2392	24.811	21.8623	267.852	63.1116	180.074	25.1441	25.2462	4.57562	67.9016	37.1082	3.82228	3.57285	14.5346	14.697	20.782
Aco009281	135.352	86.6635	48.689	37.9745	0.918849	2.7369e-15	green	46.4728	56.8193	32.7787	45.9823	39.9125	24.7019	29.6465	24.9795	9.32349	46.2937	39.3185	13.8102	29.77	34.9779	12.2375	13.3284	25.6246	9.79919	11.2991	23.4376	12.961	14.854	15.5714	37.0196	12.6608	20.2418	21.4702	12.9913	5.11279	8.65248	10.5512	6.88986	7.33446	18.578	17.301	17.2964
Aco018948	47.7483	19.3358	28.4125	-9.07674	0.705696	1.53038e-06	green	15.8831	22.2362	14.9469	18.0311	17.7814	15.8061	12.2631	9.3477	4.5199	13.8971	13.9879	6.5084	13.1263	13.1391	3.51698	12.8143	7.66999	4.21514	10.0596	4.34016	5.99287	20.1416	8.27303	14.3987	6.4913	6.39247	10.2786	7.93044	6.7609	6.96395	4.03383	4.9858	3.792	2.49975	3.93142	2.19777
Aco003165	9.11657	0.387361	8.72921	-8.34185	0.361851	0.0301154	green	58.8244	51.7507	66.0852	90.3928	67.2859	64.4687	71.6702	55.891	55.22	65.4405	40.561	53.9633	84.3965	50.2341	38.635	70.844	58.4437	46.8357	24.1004	60.1094	58.3789	23.5011	36.2065	28.6009	54.7654	58.9785	64.2876	54.3515	45.7791	63.403	14.7575	16.1762	12.4618	45.7327	56.6143	47.9302
Aco006301	44.1136	23.5849	20.5287	3.05624	0.743934	1.99619e-07	green	43.7745	41.3388	40.9961	30.2381	30.0438	29.0224	18.6249	23.8024	21.1336	40.7785	26.8626	18.0218	20.3687	22.9548	19.0734	13.4437	16.9897	17.2522	19.5108	14.4554	12.1299	40.0563	40.3535	47.9382	15.3101	51.2273	33.6258	15.2559	10.9415	9.67807	5.54828	5.54501	7.37935	25.6019	23.558	18.5155
Aco011240	31.1816	9.74561	21.436	-11.6904	0.666468	9.10104e-06	green	113.922	105.562	124.539	97.7236	113.466	117.928	93.3569	121.86	94.0078	117.334	103.197	105.717	104.073	121.2	90.2732	93.6152	110.779	94.8532	101.496	94.6428	68.0917	86.0728	97.3989	143.2	68.5731	127.136	110.793	51.2484	36.1058	56.3457	65.8691	58.6599	58.3551	39.5856	52.198	37.0579
Aco013529	1.25284	0.759565	0.493273	0.266292	0.25714	0.130032	green	34.4873	44.7907	37.7027	29.682	36.7709	33.447	44.1361	41.1835	24.0389	49.5074	51.7762	41.6102	44.6658	62.0417	30.6923	38.4048	64.6527	42.0821	42.831	52.2455	41.1866	49.7304	38.6065	51.5789	36.7657	102.984	38.7025	37.5983	29.451	35.8566	50.1775	38.5264	52.2021	46.1409	42.3396	43.4007
Aco016675	115.744	57.9387	57.8052	0.133562	0.833046	2.91923e-10	green	252.786	218.374	151.701	234.836	200.405	130.984	84.1286	52.6394	24.0562	198.504	111.645	23.2457	124.516	136.784	30.397	68.5168	72.7273	31.8631	27.9131	23.1559	11.3765	25.9003	54.2729	136.274	99.0614	30.7017	48.7668	32.7138	25.1137	25.1804	36.9628	19.4737	30.579	56.7934	60.4573	52.2469
Aco031836	27.045	24.3148	2.73021	21.5846	0.791455	9.0897e-09	green	20.5552	49.4049	15.9392	21.0389	39.5255	12.7424	20.4628	22.5698	4.13553	49.6054	59.2486	6.82004	32.1546	49.7769	4.03495	19.2753	28.6289	5.68852	6.72543	19.0016	20.9195	25.4507	21.0601	77.7218	1.41987	30.7966	19.3444	5.12212	6.70768	3.14768	6.95089	9.72959	4.58125	25.045	13.5668	39.8896
Aco011200	50.8797	24.495	26.3847	-1.88966	0.708663	1.32189e-06	green	288.135	235.116	158.762	428.319	409.313	200.795	232.003	121.754	21.6673	272.193	247.771	42.5388	202.808	189.945	19.1184	114.807	84.385	13.0486	33.8316	34.0836	7.83438	30.6914	59.5639	173.727	212.136	52.8714	99.9504	194.254	51.204	163.565	3.28511	1.32957	2.4095	59.3456	91.2154	81.5059
Aco021608	12.9213	10.6377	2.28359	8.35414	0.697512	2.27171e-06	green	7.522	8.71484	5.51511	6.6567	10.0668	5.39195	5.99808	8.30106	7.34014	13.9519	8.23244	6.70216	8.30898	8.25035	4.75696	6.01511	6.78428	4.59405	6.28731	6.62141	4.35141	5.84049	6.24988	12.5795	3.66532	6.63195	7.19709	7.77538	7.96272	6.22439	4.94337	4.54779	4.87881	6.41577	7.88763	6.39544
Aco011661	94.5563	77.8391	16.7171	61.122	0.90995	1.49667e-14	green	60.8224	71.6186	38.2013	51.4787	64.1444	33.7673	30.4135	36.2992	22.5186	85.5108	61.726	23.7719	38.8514	52.7895	21.0976	23.5247	32.7127	22.0804	29.2583	21.232	24.527	20.6594	23.6134	73.6742	24.7737	41.4053	21.8078	31.9487	19.2366	19.7064	28.3748	22.5151	28.0228	31.0508	26.8791	25.4623
Aco007579	67.9004	35.3092	32.5912	2.71804	0.821037	8.6177e-10	green	54.3413	62.8326	61.2612	40.0329	52.4065	56.9097	33.5242	48.1002	36.8946	51.8667	44.3216	39.2588	43.3808	53.5084	36.3816	33.8575	45.4282	33.7025	43.1322	37.5109	29.51	35.8625	38.8777	54.7588	28.4553	54.0022	38.7817	23.6516	13.5713	24.0213	28.3804	16.3563	23.4231	33.9781	25.3202	26.2982
Aco023420	25.3645	14.6584	10.7061	3.95224	0.726807	5.1822e-07	green	34.1323	42.0333	34.6831	11.5711	30.6808	31.5123	6.89476	12.3903	22.8309	26.769	29.6259	27.7644	21.7984	20.4788	11.8282	3.90048	25.3232	18.4902	16.7096	13.6889	31.3206	4.54061	20.2574	44.8788	6.04819	48.568	6.68496	6.9302	10.4523	6.91527	11.2764	4.7808	5.69398	25.725	11.2179	10.4791
Aco008335	63.8936	27.7431	36.1505	-8.4074	0.762594	6.46165e-08	green	80.599	85.6231	85.2647	74.3399	70.9781	73.1397	40.3868	55.8743	43.681	61.487	78.0651	50.7338	51.2625	85.2639	42.1755	40.3637	81.0494	51.2707	41.0375	69.4796	65.3803	35.3889	37.2731	78.9544	31.6237	78.6593	35.8728	40.463	29.0489	27.9471	27.7169	24.8476	29.3178	84.7891	72.5134	78.3309
Aco003452	159.959	75.7387	84.2208	-8.48207	0.885035	7.81277e-13	green	321.091	342.347	238.78	311.228	326.862	233.996	63.5842	140.769	92.6881	204.103	259.251	176.853	90.7742	254.024	155.8	44.7266	188.061	155.957	46.8668	61.5891	62.9617	50.7946	50.012	411.146	92.3229	271.407	54.74	56.1454	39.162	64.0984	64.2425	26.7917	38.0443	47.7429	49.2955	44.6647
Aco000096	12.9034	11.6286	1.27483	10.3538	0.375354	0.0240808	green	0.599177	0.320327	1.39863	0.867448	0	0	1.3167	0	0	2.31236	0.109716	0.063667	3.12682	1.11584	0.291177	1.61421	4.5495	0.210058	1.49008	0.523808	0.02748	0	0	15.6532	4.07415	0.522696	0	2.1077	2.39683	1.59347	2.08089	0.990179	1.14068	0.860749	0.69495	0
Aco024851	1.45746	0.859517	0.597945	0.261572	0.172776	0.313612	green	0	0	0	0	0	0	0	0	0	0	0	0	0	1.19296	0	0	0	0	0	0	0	0	0	0	0	0	0	0	0	0	0	0	0	0	0	0
Aco009650	9.21747	6.52335	2.69412	3.82923	0.641694	2.46661e-05	green	23.0804	29.3379	21.1436	17.3069	25.7078	20.6662	14.1106	19.782	15.8406	23.313	22.2931	14.0931	17.1529	22.259	14.5129	16.9269	19.0499	14.7137	19.3845	20.7343	19.5378	23.6695	17.0839	29.1075	12.4492	29.0268	14.342	16.9403	18.6655	17.7477	18.7268	21.7971	20.6426	23.4623	24.2154	17.8553
Aco008175	89.8617	42.696	47.1657	-4.46974	0.790989	9.40429e-09	green	34.5155	37.5132	33.0789	29.9569	25.9271	29.9424	25.4481	22.4485	15.9868	33.3521	22.9829	19.2792	31.3085	20.8387	13.7231	16.5377	14.2742	12.9949	19.1377	12.1006	12.5958	23.7845	20.295	24.7183	11.4986	22.5019	22.1156	14.5987	10.2628	9.87748	5.37788	8.6245	6.61957	12.8085	13.0157	9.39199
Aco010886	23.7303	15.5366	8.1937	7.34287	0.704761	1.60212e-06	green	24.8324	30.7482	9.25923	22.8124	14.3387	11.082	3.81799	8.8378	7.69091	32.2834	22.4268	1.45651	14.0301	10.9239	2.1938	4.54466	10.0017	2.48751	3.37991	3.80336	2.51571	4.73138	4.28836	33.1748	3.57258	3.85776	9.09318	7.61506	3.53965	1.28321	1.04022	1.64816	2.01641	38.356	19.3918	27.0837
Aco029371	16.0198	3.33812	12.6817	-9.34356	0.482749	0.00286355	green	188.225	163.609	168.134	138.553	146.045	166.602	97.919	188.831	154.535	314.407	160.246	270.747	168.016	152.999	212.249	73.3091	126.554	138.593	34.976	24.4509	38.73	40.772	19.6791	208.247	194.12	162.158	38.9088	328.451	55.5941	69.1305	44.077	23.2156	30.9853	19.0409	26.6712	22.0385
Aco013365	84.2906	55.4475	28.8432	26.6043	0.868072	7.07932e-12	green	38.1505	66.7346	46.8784	37.7507	64.4662	30.5976	15.6168	42.4305	2.48584	68.0749	37.6453	3.43807	28.4047	52.5175	2.32265	7.73823	14.6954	2.03642	0.42157	0.754997	0	0.224665	0.658229	42.7537	2.07774	8.60355	1.35629	1.45177	3.08161	3.32934	0	0	0	12.3542	5.77882	7.31593
Aco005324	12.9268	3.4664	9.46045	-5.99405	0.470633	0.00377025	green	24.2001	30.2521	15.7528	28.8888	22.6927	13.1419	6.70162	17.163	7.74981	5.53868	10.3927	19.6592	12.8203	25.6421	12.8682	17.1811	35.5051	11.6623	8.40433	22.7238	26.1704	3.445	1.93208	23.329	5.24985	15.1464	1.75531	13.2114	5.49446	8.81267	16.8313	9.60328	8.67356	21.1357	22.7991	27.1747
Aco011972	12.0194	0.999851	11.0195	-10.0197	0.433225	0.0083069	green	83.6676	112.336	83.4858	89.2775	110.312	82.2591	82.8606	102.393	105.322	106.422	134.196	93.2014	80.6048	114.11	92.8371	62.1345	104.395	85.336	74.8855	77.7009	57.4501	81.3367	90.5201	89.7645	108.283	94.1034	81.866	87.0301	95.5502	94.1888	86.3176	69.398	63.9245	63.9146	71.4075	63.9073
Aco009315	50.6054	17.0982	33.5072	-16.4091	0.733433	3.61353e-07	green	24.5661	28.7747	28.7751	17.7709	23.1396	28.2637	13.9138	19.7176	19.3385	17.3599	18.7209	17.577	17.5554	20.2841	16.7537	13.8232	17.7606	19.3521	16.4639	18.7022	16.8991	15.1248	18.5189	26.3303	14.5221	27.0931	15.8043	19.1913	12.3585	13.9336	7.01362	7.2738	9.35138	22.6089	18.2813	19.6783
Aco007033	47.9572	20.5679	27.3893	-6.82139	0.702636	1.77674e-06	green	39.0608	39.2385	34.6582	28.1906	31.6913	28.6162	29.1583	29.3179	22.9028	38.4231	29.1693	21.406	30.0232	31.1932	19.3886	21.1884	28.2616	21.7848	31.8005	42.5315	25.4127	41.462	31.6608	44.9483	20.7139	38.6408	37.3371	21.7971	21.317	19.7894	15.1877	12.6198	16.2088	35.1616	30.7198	32.48
Aco009969	94.9297	58.4639	36.4658	21.9982	0.860844	1.65416e-11	green	568.433	431	321.093	594.847	453.216	332.148	117.725	144.848	42.3919	408.375	325.471	101.676	252.484	471.785	71.3733	79.854	275.305	66.6403	35.4935	68.2578	87.3984	66.0782	35.1275	751.755	297.322	232.693	30.0338	218.822	100.285	299.809	208.885	65.5363	82.3304	85.0307	120.958	164.781
Aco030547	22.8011	21.5476	1.25354	20.294	0.710578	1.20145e-06	green	17.2876	21.2772	10.3511	11.3784	13.4083	7.74529	11.0226	26.4609	9.35028	51.3036	41.5125	10.6105	22.9519	51.5942	8.37004	7.78256	25.9435	12.1564	10.6689	22.1915	9.18282	9.81354	15.7113	89.2635	9.32273	39.2409	13.8373	14.8966	10.5377	8.8388	3.35466	3.6642	3.47583	13.6747	12.5242	9.4992
Aco021992	152.25	103.815	48.4355	55.3795	0.952033	4.6501e-19	green	89.3354	88.9834	77.0322	77.0594	70.4303	66.9143	49.8729	54.7535	28.8165	89.6083	53.9553	38.8023	74.6344	71.919	30.7624	32.5004	50.9062	31.1276	37.2751	32.5963	36.4707	25.0227	39.3998	91.9395	41.0575	61.3457	37.9328	41.388	30.0343	36.6972	26.6416	18.9945	19.8837	35.0971	36.9858	36.022
Aco013987	73.935	55.2971	18.6379	36.6592	0.879377	1.69018e-12	green	43.3081	61.1884	18.3868	42.1308	43.0303	16.2679	15.708	21.6716	5.94209	41.8072	51.183	6.43599	26.6604	41.1317	6.37536	11.4082	26.5287	5.05685	11.61	14.5614	3.78053	8.11482	7.98034	49.2591	8.45293	22.0137	10.3124	8.53928	4.71291	3.2874	1.52569	1.35464	2.53465	41.8682	33.804	24.0216
Aco004057	94.4049	48.1042	46.3007	1.80357	0.816933	1.22498e-09	green	42.5354	71.8736	17.0604	38.4313	52.5447	7.80858	2.97865	13.3286	0.16777	13.0449	35.746	1.37571	7.70538	25.6259	0	1.79758	13.3744	0.581961	0.361376	3.48737	2.41148	0	0.293861	31.8461	0	0.800631	0	0.770932	0	0	0	0	0.231843	4.36801	2.8564	1.3169
Aco005331	24.062	12.1022	11.9598	0.142374	0.709187	1.28788e-06	green	84.6823	90.4935	57.2562	79.3239	63.4255	41.6993	42.3721	63.2678	63.3151	110.85	48.0678	28.5869	49.9433	40.3675	29.8273	33.4994	44.6892	31.2849	27.9357	20.3649	29.1291	60.6866	34.2108	105.705	60.2793	69.4678	85.1042	64.2474	39.5371	28.0748	7.46633	8.74889	8.07396	86.4975	70.8463	56.8601
Aco015904	17.2507	8.16669	9.08396	-0.917273	0.461791	0.00458027	green	2.12514	0.380524	0.480792	2.37724	1.31667	0.418455	4.08288	0.121366	0.406428	14.8782	4.74552	1.3867	9.53224	1.2743	1.23946	8.49228	0.489894	0.871295	3.29751	0.920068	1.10509	0.901932	3.06058	23.7895	7.86184	6.12013	3.14203	3.26265	0.132884	0.723332	1.29592	0.206429	0.233017	4.69049	6.29342	3.36923
Aco016521	9.69917	5.88305	3.81612	2.06694	0.623631	4.836e-05	green	16.2215	19.0956	17.6262	16.0455	21.7955	16.4158	16.2906	17.5666	9.57761	27.5476	18.3203	10.4435	20.1443	16.2114	6.27595	9.29723	8.90823	9.17845	7.09251	16.1196	9.80426	6.10576	16.7491	19.249	7.76609	11.6707	19.1145	16.3801	15.2208	15.1976	10.3116	11.9703	12.2895	7.61996	11.9831	8.9529
Aco018994	39.1678	8.4758	30.692	-22.2162	0.676644	5.88037e-06	green	94.5211	104.871	95.9607	77.6749	96.9034	80.1658	66.9486	93.1622	69.1943	95.2131	83.4384	70.8799	75.9047	103.007	76.5063	58.2858	101.737	92.6085	75.9118	95.5763	108.121	83.0635	64.7999	100.84	61.4139	101.075	79.0804	72.7465	79.7958	83.2412	49.0298	41.8161	48.895	79.4257	89.4625	85.169
Aco000535	14.9907	9.68547	5.30519	4.38027	0.669882	7.87513e-06	green	2.86131	1.9932	1.70258	1.43433	0.694245	1.95184	0	1.10757	1.13955	2.05297	0.535284	0.572293	0.240134	1.44715	1.54143	0.502782	0.545162	0.829093	0.712983	0	0.207403	1.11692	2.00331	3.75633	0.569796	2.54714	1.75801	0.226647	0.21424	0.263904	0.182019	0.202339	0.384489	0.291047	0.402298	0
Aco020426	2.69601	0.981932	1.71408	-0.732148	0.411075	0.0127526	green	166.308	151.395	142.078	123.283	125.159	135.487	97.1831	102.281	131.605	131.469	94.0381	130.045	107.55	94.2943	136.861	141.645	107.659	127.511	123.241	158.271	153.401	120.038	121.592	167.142	119.048	190.506	116.138	140.655	122.569	107.988	92.8579	84.5709	100.118	145.333	121.191	125.645
Aco013410	104.308	75.0737	29.2339	45.8398	0.893649	2.22608e-13	green	112.462	102.371	92.347	108.702	140.02	95.9494	39.0334	61.9192	19.9706	123.798	153.133	42.3086	59.3963	108.193	24.928	27.115	60.7526	25.4461	25.021	20.7677	19.3497	17.6851	18.6011	202.352	36.225	81.9291	20.8115	32.3288	25.8236	27.0068	50.0987	22.5063	25.9483	19.9426	23.2476	26.8572
Aco019881	33.086	14.4225	18.6636	-4.24111	0.680646	4.92912e-06	green	61.7215	72.4249	68.1	37.3097	48.1191	53.9907	18.7982	42.6573	29.8267	25.7604	36.8634	26.7078	27.4306	51.6235	30.4734	24.26	60.5478	42.4238	23.5777	45.4822	50.9843	27.7489	21.0712	87.8127	26.1386	49.6221	17.1228	36.1166	33.0725	33.7756	27.786	37.6635	33.1362	31.875	30.9405	39.2192
Aco026062	11.554	3.26637	8.28767	-5.0213	0.49468	0.00216259	green	35.6125	41.639	32.6543	49.9908	34.1478	29.1237	24.7452	22.1071	11.9303	37.329	27.5333	10.6266	24.0896	37.2199	13.9821	29.1334	49.479	29.439	24.0087	64.1704	52.3827	16.3696	19.2757	24.6249	38.7898	23.3718	12.8349	15.8058	9.0805	21.8658	9.54475	9.2233	11.18	20.3687	18.8332	26.3475
Aco016440	34.9757	31.3236	3.6521	27.6715	0.776725	2.56419e-08	green	85.1426	107.006	36.7747	75.7833	67.435	32.7333	33.3647	27.3563	8.75182	98.8999	80.1033	20.9466	31.7712	88.2629	15.7101	11.6124	40.3206	14.3438	6.25885	5.62716	4.69578	3.66016	12.2671	303.054	40.5216	126.617	5.42132	30.8491	26.1703	30.1656	3.34603	3.95294	5.03442	107.634	54.5989	68.4662
Aco012363	42.0104	33.2085	8.80186	24.4067	0.811145	1.98257e-09	green	8.98164	12.046	4.27086	20.9153	16.638	4.96949	6.72956	6.56507	0.524409	17.9367	19.8688	1.60851	10.685	12.3496	0.703324	6.10211	16.154	0.921197	0.634916	0.590606	1.40465	0	0.732067	17.0291	2.90241	8.10937	2.15366	4.9001	0	1.7516	1.46413	0.1298	0	10.4184	3.91157	8.03368
Aco024224	32.8575	8.86093	23.9966	-15.1356	0.678853	5.33642e-06	green	27.9505	45.7106	43.4508	29.4895	50.3771	44.246	42.1803	43.162	21.917	49.8195	46.048	35.9425	47.0301	48.7317	23.0454	35.2604	30.9935	21.6571	29.8951	24.0147	15.9829	49.1256	44.9494	55.5438	33.3293	38.4979	40.0736	28.2542	23.5937	30.3453	12.3272	10.366	12.3881	26.6757	22.3631	25.838
Aco004235	30.4504	25.492	4.95836	20.5337	0.793818	7.63733e-09	green	419.661	402.831	209.942	490.792	439.611	167.01	236.701	371.704	97.3008	728.192	572.133	177.379	402.12	373.222	97.3198	171.049	269.255	121.275	164.611	27.3994	37.8575	77.4395	232.436	687.672	184.991	376.13	236.158	196.613	68.966	93.4349	123.42	100.734	153.665	413.24	394.062	439.372
Aco004137	59.9989	24.9876	35.0113	-10.0237	0.733832	3.5347e-07	green	273.1	419.977	287.93	220.623	352.26	239.606	75.2988	261.163	94.2719	182.52	339.181	183.024	164.962	426.747	148.625	62.3467	391.851	236.032	55.91	456.885	376.74	49.9879	24.7291	539.994	67.8116	439.212	35.4113	70.3861	43.958	38.7904	43.9011	24.556	23.2865	256.479	186.33	178.069
Aco011412	70.3328	55.0963	15.2365	39.8598	0.908049	2.103e-14	green	255.889	290.975	224.566	232.242	238.446	200.676	171.879	178.714	110.309	286.009	220.653	136.772	232.667	257.154	112.588	164.477	172.647	121.088	208.758	129.166	136.344	167.178	153.65	330.952	144.325	257.056	129.333	210.423	181.891	204.67	122.878	82.6785	90.9461	143.857	171.824	155.513
Aco007388	48.6413	17.3597	31.2816	-13.922	0.740614	2.41549e-07	green	36.9395	39.2083	42.9038	38.5125	36.5944	46.8417	30.8962	34.7023	20.8941	49.8943	36.3407	40.0101	45.4545	30.6776	25.9594	40.4182	33.2245	25.8248	40.5867	23.273	20.924	29.2702	29.4363	53.2637	32.9691	34.0433	21.997	24.3435	11.202	22.993	9.16057	3.88006	4.95794	23.915	20.1142	17.424
Aco012466	49.3182	42.5744	6.7438	35.8306	0.86414	1.13009e-11	green	66.0216	61.483	40.0786	72.1992	65.7796	40.6229	43.0386	50.6307	29.5799	114.415	58.4543	31.6532	71.6247	70.5298	37.2403	29.8785	61.4871	35.4783	30.137	59.9756	38.2818	28.3811	28.6874	106.215	31.2545	72.5168	38.1759	30.2646	34.279	26.1723	26.3949	24.6343	24.3651	37.2776	35.8162	36.3387
Aco005593	50.6883	19.8667	30.8216	-10.9549	0.746345	1.7349e-07	green	361.592	356.401	286.875	374.508	359.946	287.689	205.638	181.624	97.3577	276.66	277.126	131.767	218.901	304.752	122.982	146.032	315.695	172.967	166.967	254.333	334.962	123.228	87.279	306.146	218.272	192.222	87.1328	159.06	156.057	297.543	217.194	78.7354	119.991	178.809	226.271	230.852
Aco001744	2.01228	0.367513	1.64477	-1.27726	0.355451	0.0333813	green	89.8765	55.4564	12.2383	59.6693	60.479	19.5237	34.4785	58.0848	20.4192	40.7979	40.1342	12.0109	53.2029	58.9041	20.0023	70.6117	26.3481	6.60748	32.0918	60.007	1.92865	24.7171	22.0075	36.9399	113.083	8.60651	45.1346	5.84741	14.5576	12.6845	35.1282	16.5364	24.2118	3.87712	3.90951	2.89157
Aco019852	2.04343	1.73181	0.311623	1.42018	0.286935	0.089746	green	0	0	0	0	0	0	0.806088	0.589757	0	0.461769	0.365941	0	0	0	0.518948	0	1.42565	0	0	0.560789	0	0	0.826675	3.39384	0.583975	0	1.69593	0	0	0.360053	0	0	0	0	0.916632	0
Aco026522	0.650114	0.293471	0.356643	-0.0631725	0.374754	0.0243258	green	0.880213	2.55206	1.85065	0.201384	0.809719	1.66604	1.43904	1.94924	0.939362	0.965624	0.995311	0.644665	1.72577	1.97988	1.54877	0.489921	0.765993	1.0975	2.84923	1.28985	0.381088	1.24436	1.55196	2.09061	1.05324	2.78449	0.799314	0.993039	1.08932	1.14649	0.180426	0.879742	0.524473	1.17544	0.839574	1.31121
Aco025854	33.991	10.7066	23.2844	-12.5778	0.66604	9.26634e-06	green	945.956	1061.88	880.466	1077.86	967.361	1085.32	565.491	569.929	381.413	676.847	1031.56	395.315	545.668	891.41	401.209	639.67	872.292	516.818	365.34	419.707	884.644	467.654	349.077	1167.36	973.355	549.093	304.478	572.298	642.898	1051.3	640.165	286.592	432.434	407.736	559.914	666.946
Aco009312	88.7985	67.5035	21.295	46.2084	0.887944	5.17185e-13	green	105.683	142.828	47.9676	97.6197	72.344	28.3058	13.8183	10.036	0.662539	37.0189	68.5039	4.50082	12.1469	60.0939	1.71463	0.764937	23.2945	0.976857	0.652353	1.37834	0.509619	0.244635	4.72347	206.879	7.06603	72.6832	0.244184	0.368968	0	0	2.00287	0.280275	0.688	7.76704	3.13634	3.01623
Aco011400	1.06361	0.399435	0.664171	-0.264737	0.421901	0.0103779	green	1.72515	2.63261	1.10837	1.48914	2.11851	1.26587	0.536007	0.929203	0.791712	1.45631	1.09223	0.554897	1.77701	2.04092	0.908851	1.58958	1.76183	1.26836	1.25551	2.03654	1.97659	1.54572	1.6695	1.42292	0.653269	1.27893	0.777036	0.246388	0.670043	1.33328	1.27211	1.02632	2.06756	1.02095	0.543938	0.661364
Aco026895	50.326	20.9591	29.3669	-8.40773	0.755119	1.02747e-07	green	72.401	81.3484	80.4612	57.963	61.5393	71.5255	41.6691	54.6109	60.8154	69.554	57.5608	59.7618	56.1828	71.1178	56.1897	34.6145	50.7416	55.779	44.2982	47.1685	49.0462	39.3389	45.7815	83.2937	43.3815	80.9999	43.4863	53.2015	44.289	56.5522	52.9433	36.6725	38.7627	65.091	53.4951	69.4858
Aco011322	11.4178	9.77206	1.64578	8.12628	0.32345	0.0543179	green	0	0.57464	0.628826	2.15035	0.619084	0.202482	17.6261	1.81393	3.01082	28.8597	7.68327	4.19248	61.003	9.16056	7.50494	7.4381	9.37685	12.1604	2.12891	5.45314	26.1041	1.57946	1.19396	168.117	80.0065	6.27006	0.202783	7.57984	14.1313	19.8871	3.85095	8.96026	10.0794	1.96132	15.3954	3.39524
Aco012129	16.5941	14.7479	1.84617	12.9017	0.624605	4.66856e-05	green	2.98784	3.65145	0.824604	3.35986	3.52829	0.950237	0.404723	4.16329	2.16256	12.5187	5.63249	0.423777	0.95859	2.60232	0.096653	0.111776	2.24984	0	0	0.780331	0	0	0	28.7131	0	2.78543	0	0	0.371105	0	0	0	0	7.74843	6.20444	7.35018
Aco014091	0.0338082	0.00081112	0.0329971	-0.032186	0.163004	0.342172	green	0.848032	2.69614	0.331746	2.64076	0.376599	1.17317	1.20539	5.30509	0.293881	1.26261	0.986097	0.189742	0.630322	0.541193	0.59901	0.738949	0.259929	0.23343	0.524166	0.77879	4.85533	0.390149	1.1844	2.40869	0.986234	0.493248	0.928589	0.609203	0.42247	4.95904	0.369539	0.891561	0.449286	1.45665	0.085672	0.385832
Aco013893	39.4088	31.6123	7.79651	23.8158	0.788072	1.16168e-08	green	26.457	61.6718	6.6185	13.4457	29.669	4.52111	2.07552	9.44101	0.354953	3.556	48.2963	0.07764	1.93044	39.2832	0.076491	0.264507	19.0914	0.571285	0.097013	0.668096	0.073293	0.089537	0.63705	63.0705	0.301611	11.5384	0.287132	0.549003	0	0	1.26716	2.46298	2.92523	5.57494	2.96759	3.48528
Aco018593	39.7591	24.5348	15.2243	9.31049	0.757842	8.6942e-08	green	84.0115	77.1131	45.829	74.0121	83.0064	36.3202	60.3398	39.8034	16.589	82.8811	71.1278	17.2497	76.2548	56.5361	16.1669	58.0375	41.5646	23.3812	42.2382	30.3297	23.4804	37.5462	31.6632	58.3155	17.6554	59.1929	53.9435	56.3774	26.8525	17.386	37.388	33.7008	35.505	31.8094	22.7449	26.2709
Aco003318	50.0629	35.5018	14.5611	20.9406	0.811722	1.89109e-09	green	80.7729	83.0497	83.4501	59.5444	67.6982	71.1536	54.2428	60.3352	48.7606	84.9593	55.4772	47.0221	76.2037	73.5171	48.1202	44.2252	55.3248	59.4206	65.3878	69.0717	61.9422	71.8036	59.3462	91.2561	42.1951	83.526	68.0517	54.5628	51.6025	48.2939	46.7931	41.6271	41.5043	64.6486	61.8933	57.3704
Aco004119	14.9301	5.60383	9.32627	-3.72244	0.554529	0.000448951	green	31.1998	37.0196	38.4511	20.038	32.6826	39.4977	14.63	27.9831	18.1675	18.0779	32.4286	14.6016	18.9444	40.5667	14.088	14.9083	37.4464	22.9959	37.0417	37.3183	33.0779	15.9906	13.9806	34.3935	15.3831	31.6634	12.3748	3.97883	7.92905	9.59249	19.446	12.5057	15.1046	35.9019	28.5623	37.6919
Aco010773	19.4897	15.1263	4.36337	10.7629	0.704574	1.61686e-06	green	18.6755	19.1991	4.69413	11.2242	18.2643	4.36356	9.10615	14.6244	3.85955	22.9929	20.7038	1.93231	13.5386	32.3381	2.29852	6.52804	24.9445	5.35296	2.06395	15.9532	15.2727	0.517391	3.27108	38.164	0.729712	19.8391	4.31055	0.557808	0.78145	1.40389	8.7727	10.3645	9.81455	23.4496	14.01	13.1964
Aco004975	6.89032	3.67722	3.2131	0.464119	0.629715	3.87308e-05	green	3.14557	3.6881	2.59532	3.18633	0.784125	1.02666	0.966468	1.25551	1.17878	2.18843	1.26784	1.23147	1.16838	1.24595	1.07523	1.27542	1.68716	1.32882	1.21487	4.01648	0.560153	0.908092	1.07934	3.27349	1.45007	1.014	1.41686	0.981912	0.970648	1.24122	0.83856	0.698252	0.928758	0.806723	1.22532	0.800748
Aco002734	0.387886	0.013472	0.374414	-0.360942	0.247855	0.144979	green	2.55004	4.72759	0	2.64393	2.3936	4.06341	0	2.45	0	2.95434	3.45691	2.54352	1.34539	2.9144	4.54472	0	0	5.71569	4.41434	0	0	0	0	4.2585	3.63231	3.25482	0	2.09269	0	2.51491	0	5.60647	2.89737	0	0	1.67365
Aco006505	59.0758	47.6739	11.4019	36.272	0.857962	2.28992e-11	green	110.48	127.294	73.2295	111.662	148.331	75.3765	42.4955	76.2802	19.3435	129.768	116.672	29.5333	77.2887	110.167	19.4328	25.1603	75.6585	28.3607	72.2261	68.574	43.4455	39.2113	30.3367	175.713	14.9386	91.7311	34.2599	42.9504	35.3894	20.2186	76.2297	71.7889	62.9007	49.6714	40.7197	39.4303
Aco027752	147.807	101.771	46.0358	55.7354	0.938991	2.50724e-17	green	631.099	950.383	278.137	661.458	529.752	238.222	126.278	226.709	118.733	506.095	562.334	76.9489	237.357	479.181	66.1341	37.8642	285.675	96.053	17.8869	59.6127	35.3458	14.3269	41.5669	787.481	57.2098	304.472	51.832	94.6678	22.3381	50.5613	15.8326	7.99728	15.1723	212.111	155.312	140.965
Aco005900	0.31058	0.0955462	0.215034	-0.119488	0.345123	0.0392576	green	1.42015	2.32539	2.26374	3.63058	0.80095	0.776435	0.801223	0.294246	0.781885	2.07368	2.14841	0.192535	1.74992	1.77402	0	0.679163	2.06729	0.530543	2.86295	0	0.339251	0	0	1.76081	0.283233	0	0.706971	0.36248	0	0	1.0327	3.73187	0.402673	1.51798	3.3776	1.99118
Aco011435	6.62065	3.38209	3.23856	0.143528	0.604509	9.43556e-05	green	19.3103	28.2086	26.1823	15.0103	20.3261	18.6715	15.2291	17.2962	8.90111	21.1759	15.8525	13.6957	21.0245	18.6453	9.90529	17.3114	16.1358	11.2568	17.0784	8.5733	13.2889	19.4609	11.4495	23.2884	10.1739	18.6953	15.2438	21.3936	17.0165	15.1094	13.7606	20.6766	15.9006	10.6151	12.7324	14.2161
Aco001086	28.7577	10.842	17.9157	-7.07373	0.637844	2.85757e-05	green	239.278	323.207	123.499	273.79	339.321	108.876	68.8907	207.348	81.6777	183.892	288.358	69.1167	118.638	314.418	73.3892	66.3845	320.349	87.4165	69.4999	484.877	214.602	213.437	90.3004	407.414	95.1306	222.899	83.0381	82.0713	70.2609	91.3295	62.4388	63.6558	68.4447	360.384	252.082	254.238
Aco008156	125.489	57.6811	67.8078	-10.1267	0.854185	3.46999e-11	green	347.69	353.756	324.62	350.92	298.352	293.581	176.309	144.53	95.3532	243.506	218.009	180.448	193.878	222.55	140.457	146.11	203.219	132.297	160.799	124.476	187.771	7.58431	150.174	333.282	146.966	233.837	113.011	135.201	80.6383	173.127	157.872	74.922	95.947	108.877	116.36	115.916
Aco002954	25.6296	16.1262	9.50339	6.62284	0.734927	3.3267e-07	green	45.029	50.0644	52.1837	37.0137	34.9108	45.4792	33.7067	34.5284	26.8854	42.0627	37.6511	26.4332	45.5816	48.1063	26.8823	40.6321	39.9917	33.6807	47.8133	30.7216	40.3804	34.7161	40.3872	49.4863	20.0821	44.793	37.6711	26.9337	25.209	28.0527	23.8322	23.5704	22.0283	27.7808	28.1594	29.522
Aco000218	8.39934	4.917	3.48235	1.43465	0.553521	0.000462141	green	16.8602	26.6531	16.364	15.5647	23.5339	16.0728	20.1375	19.1415	4.94454	46.6916	23.3922	4.66301	25.6602	14.3205	0.464478	13.2597	7.95984	0.542243	5.09496	1.50254	0.86387	2.78212	1.91866	21.0401	16.009	1.53023	1.39444	55.6831	4.44886	5.21212	0.515697	0.342669	0.321212	1.61612	2.23087	2.59985
Aco007732	20.9211	11.5478	9.37336	2.17441	0.665025	9.66964e-06	green	48.1444	64.5799	44.9106	42.1008	48.3045	39.3411	33.5665	38.1542	32.3277	44.3234	44.4037	27.5647	47.2708	51.4472	26.9329	33.3578	43.9047	32.0124	44.857	47.6303	40.7338	34.4753	36.0641	47.3593	23.981	42.0026	35.6544	29.3851	28.8001	26.3034	38.0846	36.6796	36.3701	51.0476	52.0977	48.7502
Aco020502	113.768	82.8405	30.9274	51.9131	0.923111	1.13106e-15	green	119.965	134.288	61.7059	123.617	102.434	45.5859	48.9338	49.4586	25.5867	118.999	94.62	32.6143	68.5848	99.186	27.5287	28.9232	53.1997	27.5047	32.7484	48.315	34.3074	79.4939	30.6608	116.093	34.3226	63.6171	27.0245	41.1939	19.3488	28.8104	30.5717	19.6568	25.6288	51.5907	38.5198	48.0758
Aco009411	33.6625	19.1393	14.5232	4.61618	0.729304	4.52933e-07	green	56.9383	46.6893	39.599	44.1774	41.5488	39.1884	41.6255	33.4609	28.4147	53.8229	30.424	28.9339	43.7746	36.588	27.8982	40.4794	30.0614	36.856	39.1179	38.6038	38.0783	38.4248	32.9116	40.6468	20.8365	43.022	27.966	24.5884	22.9459	22.2334	20.4405	21.8951	29.4356	37.0683	32.8237	32.7294
Aco019577	41.0968	19.8778	21.219	-1.34121	0.715396	9.41623e-07	green	814.95	500.54	379.827	1051.7	814.814	428.417	292.046	248.66	38.2608	698.197	653.054	162.479	406.44	516.905	117.582	144.52	470.891	257.789	33.2863	220.292	243.762	44.9818	31.685	597.654	263.877	524.154	95.4091	349.826	122.585	407.213	737.343	165.519	177.116	278.345	272.927	343.622
Aco001559	16.6778	5.76719	10.9106	-5.1434	0.626837	4.3046e-05	green	4.51385	3.9257	3.4398	2.31598	2.81532	3.404	0	2.70206	2.12395	0.620926	2.17922	1.45559	0.665267	1.75665	0.791559	0	2.46028	1.26559	0	1.36483	0.532681	0.565087	0	6.9022	1.41943	3.6504	0.789389	2.37545	4.71081	2.49441	0.338221	0	0	2.45484	1.50726	2.85864
Aco010830	31.5654	14.4548	17.1106	-2.65573	0.689428	3.31417e-06	green	186.274	133.842	165.152	177.088	122.79	173.978	153.407	98.0323	90.0296	183.351	100.98	141.108	195.289	107.162	107.855	148.494	93.0998	102.888	132.608	89.607	89.462	127.603	107.221	195.523	93.2449	126.208	122.983	99.6572	60.7511	66.1051	91.8441	42.8032	66.0621	104.453	92.0875	103.904
Aco003780	103.718	68.1386	35.5793	32.5593	0.886875	6.02632e-13	green	24.4845	22.7543	17.4078	14.6553	15.3229	16.7499	12.047	11.6831	7.48388	20.9221	11.2791	9.70099	11.8673	12.3982	7.12821	12.1521	11.2748	6.363	11.6936	8.901	8.62901	11.1004	10.8231	22.5195	7.91742	13.7587	11.6725	6.18309	6.34814	7.83533	5.61796	6.18703	8.7567	8.75123	9.05042	9.16982
Aco014440	2.22362	1.07796	1.14565	-0.0676915	0.49763	0.00201442	green	15.532	16.2863	8.88072	9.7839	15.1605	8.12805	7.01081	10.8936	7.46629	12.9297	12.1191	4.58693	7.16958	11.9004	4.96924	2.13132	5.96195	7.45544	9.06356	3.30784	3.64099	4.73789	10.2342	19.1389	6.25536	16.4088	11.9756	15.7396	16.4697	19.8169	7.94947	8.37596	9.24259	11.4231	6.07752	9.82376
Aco025099	17.759	7.09628	10.6627	-3.56641	0.620397	5.43157e-05	green	9.00191	5.8586	1.95018	8.11602	3.89053	2.5676	1.82686	3.16767	1.47846	3.50233	3.9897	0.459015	2.44791	1.90931	0	0.15773	0.661929	0.171781	0.18638	0.366492	0.096994	0.768648	3.08695	5.9757	0.530458	0.298346	5.59886	0.118611	0.2064	0	2.9766	1.04518	3.45871	4.52735	1.96988	1.63625
Aco006073	28.6757	11.0648	17.6109	-6.54611	0.68276	4.48545e-06	green	413.826	368.755	266.081	359.107	346.914	224.43	189.359	183.835	126.822	341.704	249.357	142.471	202.385	254.742	128.058	112.419	233.751	137.994	131.307	225.609	208.558	100.766	143.311	489.942	97.904	330.35	137.183	142.58	93.2244	110.204	411.128	257.018	334.683	230.638	179.109	215.189
Aco027895	103.123	71.3126	31.8107	39.5019	0.907359	2.37504e-14	green	222.033	178.145	66.1446	139.688	188.508	80.8695	35.7118	89.0722	22.814	160.358	92.0052	10.7271	45.5587	82.8715	4.21637	7.73019	47.9954	13.3565	10.4107	48.2962	56.7735	9.29732	22.3374	239.578	19.5021	69.1891	26.0197	39.5027	10.7324	8.62712	23.554	19.792	27.282	67.9402	20.6906	57.862
Aco002476	6.91692	3.30159	3.61533	-0.313743	0.50426	0.00171346	green	97.53	64.8782	40.5652	142.442	99.2136	38.6621	23.5008	73.8479	10.7296	94.5814	75.4296	19.1364	66.3629	53.0901	10.6601	16.4261	45.9768	8.20563	26.4223	21.4284	3.26868	3.4267	10.3184	137.643	51.8504	51.9239	27.2044	221.005	143.904	69.0264	8.92641	3.68107	2.11447	38.2226	31.2569	20.8094
Aco013290	2.35949	0.989861	1.36963	-0.379769	0.0750483	0.663553	green	0	0	0.956537	0	0.057658	0	0.089929	0	0	0.045286	0	0	0.27353	0.098582	0.511418	1.52691	0	1.99004	0	0	0.045905	0.069645	0	0	0.043061	5.75647	0	0	0.056316	0	0.043423	0.087729	0.055289	0.09498	0.077078	0
Aco003827	106.241	71.3704	34.8707	36.4997	0.883823	9.24765e-13	green	172.154	186.994	123.876	180.757	182.204	133.051	95.3876	96.8259	34.7396	169.149	163.594	73.4123	140.614	191.25	49.4748	79.7115	120.724	54.1063	63.595	61.5199	55.589	55.7363	47.2356	172.462	77.3643	73.112	55.0575	71.3873	33.9143	83.0068	109.066	29.2715	42.9317	60.5467	75.7863	76.965
Aco001106	11.3916	8.5901	2.80154	5.78856	0.390661	0.0184871	green	0.306507	0.710896	0	0.665645	0.750579	0	2.21781	0.439804	0	6.75206	2.05885	0	6.8309	0	0.177169	0.661913	0	0	0	0	0	0.223202	4.83867	21.5391	4.16223	0	4.56938	0.236526	0	0	2.14644	2.1265	3.29133	0	0	0
Aco007915	57.9489	29.6784	28.2705	1.4079	0.777449	2.44128e-08	green	60.8506	68.5618	44.1518	46.2684	61.0469	37.2122	14.4783	40.6926	17.3328	28.546	35.0359	18.7028	23.675	56.5473	15.9633	15.8738	58.4891	32.1575	16.1269	46.9902	51.9607	8.19419	8.7052	75.9193	9.88838	56.1166	9.78383	33.5677	26.3565	24.9063	19.1195	19.1525	19.9739	37.2123	37.2001	33.4606
Aco005277	3.73091	0.77315	2.95776	-2.18461	0.429495	0.00894609	green	77.8615	84.4604	63.4468	76.3538	91.9871	64.5111	19.1152	128.091	65.1362	33.0675	51.4217	18.0704	22.9054	30.7431	18.9796	9.71097	29.4612	15.6434	11.3888	6.54142	5.82136	33.5232	74.7887	112.975	101.938	28.6396	45.6139	72.3848	85.3607	56.9146	12.5945	13.1119	16.5257	35.1246	79.19	41.7478
Aco006106	12.9928	4.9473	8.04548	-3.09817	0.533958	0.000796447	green	77.2991	66.4722	77.3041	66.421	49.1093	51.7923	51.4772	49.191	60.3595	68.4895	45.1368	55.2058	44.6941	45.719	51.0504	27.8488	46.2219	53.4336	45.4079	40.3026	31.7588	64.3796	69.1144	73.024	36.4107	88.2144	75.8624	42.9198	33.0555	26.1612	27.934	26.0095	31.522	82.0879	68.5753	54.6751
Aco024148	24.9998	16.2955	8.70437	7.59111	0.726925	5.1494e-07	green	31.9016	38.5935	29.2508	28.2337	32.2851	27.7734	25.1644	23.1638	15.3098	42.0437	28.7526	17.9863	39.9805	29.6345	15.489	24.7075	19.5822	17.1616	30.3843	20.5738	18.6537	27.1281	25.2164	40.604	16.1677	28.9781	26.2931	24.8646	26.9304	22.9075	24.5101	24.82	25.6252	19.9334	19.1812	20.4206
Aco006469	40.3123	26.1113	14.201	11.9103	0.83471	2.49583e-10	green	33.1738	37.288	32.2204	28.7784	30.1345	29.2452	19.2506	22.2198	13.4972	34.5562	27.1139	24.1009	32.5081	32.8893	19.535	16.6521	20.6979	21.5784	17.7626	22.0161	22.8555	29.0891	18.2186	37.4743	21.3028	28.645	18.0242	27.8284	19.6132	31.0976	21.061	13.8622	15.5241	24.5322	25.2305	23.1627
Aco001047	127.254	70.5468	56.7075	13.8393	0.875556	2.78542e-12	green	456.843	485.503	386.005	509.036	583.301	393.771	301.636	289.441	139.272	488.107	384.704	211.599	320.126	368.54	136.004	125.072	245.204	145.838	132.118	140.33	202.238	144.731	152.569	406.003	192.062	385.922	191.379	266.21	210.563	239.384	215.779	109.547	109.423	122.643	143.114	183.82
Aco016363	28.3704	18.4825	9.88792	8.59459	0.737332	2.90842e-07	green	47.2187	23.1239	12.1054	30.8198	15.0743	10.4397	17.7916	14.5	6.4039	25.8614	10.2928	2.92838	21.854	11.5913	1.98824	8.79123	7.72774	2.99655	2.65911	3.57258	1.53834	2.78762	16.01	44.7172	12.6051	5.26351	19.9917	12.6247	2.94611	4.77496	5.09154	1.92314	4.50295	18.9154	14.8197	16.5291
Aco004046	6.03616	2.33321	3.70295	-1.36974	0.546794	0.000559361	green	28.9358	43.5325	15.8402	47.1619	50.5197	20.9061	22.5648	26.5048	22.5243	53.4286	66.7089	29.9451	44.0409	58.811	18.1528	20.5307	37.5447	28.7676	20.4475	39.5756	36.5243	7.02103	55.4503	39.4604	17.1763	36.3661	23.9326	43.1993	45.2694	40.7965	5.31027	4.5967	5.39123	16.7269	14.281	13.5339
Aco004574	32.189	10.7553	21.4338	-10.6785	0.647947	1.93406e-05	green	17.8343	12.5459	8.86008	17.0619	12.8522	6.97105	5.03488	1.80601	0.362127	11.4438	5.85029	0.848015	5.69571	6.27365	1.20702	1.33639	2.73873	0.535836	0.435058	0.366032	0.161094	21.4881	2.44828	8.16408	4.55392	1.27265	2.13213	1.19832	0.178019	1.3432	0.856877	0.092392	0.448129	0.8464	0.888017	0.673878
Aco022637	3.15876	1.91965	1.2391	0.680548	0.306646	0.0689041	green	0	0	0	0	0	0	0	0	0	5.26775	3.82001	0	0	0	0	0	0	0	0	0	0	0	0	0	0	0	0	0	0	0	0	0	0	0	0	0
Aco010350	57.088	46.5757	10.5124	36.0633	0.844803	9.28343e-11	green	41.3034	47.8494	32.004	21.5263	33.7988	23.3751	10.2166	31.9262	11.8667	45.9666	48.9987	19.2153	24.004	49.6468	16.8167	22.8175	26.2743	22.3616	2.73385	1.99312	3.92061	5.19506	1.26669	106.493	4.1131	56.4159	1.30082	7.49629	2.69118	2.59286	4.01144	0.499169	1.83525	0.731076	1.72683	0.859743
Aco011337	93.1181	49.554	43.5642	5.9898	0.830268	3.77782e-10	green	43.0774	42.2031	32.0223	33.8028	37.2884	28.1225	28.6052	21.5363	14.3546	31.6981	27.4483	18.8528	25.119	29.7856	11.7545	24.5559	26.5359	13.9162	21.9406	17.5745	17.1551	16.3417	21.2668	33.2388	16.8962	20.7352	21.7664	25.0669	16.1525	15.8515	23.7251	17.3823	19.0532	16.3355	14.8821	15.6436
Aco009841	1.56525	0.68492	0.880331	-0.195411	0.463974	0.00436748	green	31.1183	32.5363	28.6234	38.2791	27.9994	31.3067	34.5504	21.731	17.8225	35.8175	33.8891	26.7962	41.594	33.4549	20.8919	35.237	38.004	22.9045	32.9704	18.6433	33.23	34.0581	26.5888	48.127	45.9409	29.3317	25.7849	25.9373	21.7345	28.1871	41.5545	18.8729	23.2022	23.0776	24.8103	19.613
Aco005726	3.12853	0.971358	2.15717	-1.18581	0.486351	0.00263358	green	37.5205	39.8349	40.0149	26.8765	33.2486	38.8074	33.1736	33.2939	42.4648	53.2089	30.1583	36.5626	37.9935	29.8833	35.7582	25.041	30.6064	31.3241	28.457	31.5378	33.9453	35.8588	24.2696	45.0192	31.1875	46.276	32.3011	40.3653	37.3634	38.4004	25.2149	23.6004	24.6779	37.9476	32.5748	34.6979
Aco005345	0.441553	0.0307138	0.410839	-0.380125	0.204421	0.231728	green	0	0	0	1.11576	0	0	0	0	0	0	0.638909	0	0.260509	0	0	0	0	0.365995	0	0	0	0	0	0	0.339328	0.117814	0	0	0	0	0	0	0	0	0	0
Aco018033	6.08905	3.76773	2.32132	1.44641	0.633411	3.37658e-05	green	20.6476	22.6827	17.8351	14.7764	19.7964	16.9403	12.2296	20.6456	14.0568	10.7764	12.6853	12.9173	12.1519	19.2247	11.7091	13.7759	19.1831	16.3306	12.3388	13.9	9.41357	24.4197	10.9947	26.4268	6.49609	17.6267	14.3614	13.3303	11.2315	11.592	11.4722	9.31732	11.0341	13.6369	9.51719	18.257
Aco015854	23.2609	9.90904	13.3519	-3.44282	0.654744	1.47535e-05	green	12.2329	13.7871	14.9738	11.346	11.9262	11.6589	9.74795	9.84516	7.4504	17.6707	11.5992	11.081	12.1751	9.82818	8.13956	8.54572	6.91346	9.34158	8.823	9.80574	6.33576	15.9259	10.2594	14.9366	7.58137	13.3677	12.2673	13.3154	9.19246	8.57072	7.43643	6.74282	7.51015	8.09601	7.76101	4.92248
Aco008900	102.149	65.2967	36.8519	28.4449	0.888637	4.68026e-13	green	28.3863	28.2113	34.3534	18.1193	17.9258	25.3596	6.46046	12.8486	5.32923	19.1326	16.2598	5.06923	10.2072	23.9886	4.02506	4.78087	14.173	7.77469	9.38392	10.0474	7.98272	9.39042	8.2295	39.2415	1.02245	25.4721	7.1122	0.821903	0.203451	0.680168	2.9107	3.36543	5.04195	7.79287	6.45556	6.61515
Aco025357	39.8241	34.0787	5.74543	28.3333	0.803251	3.72564e-09	green	5.37536	4.6866	4.47884	3.71759	4.60363	3.68726	2.20156	3.80259	1.91582	3.22443	4.92564	2.22359	2.55224	3.51861	1.96066	2.31674	3.71555	1.76604	2.51391	3.64833	2.54745	1.81713	1.75483	10.8296	2.39775	5.24189	1.68707	3.0698	2.51993	2.32893	2.20052	2.02806	2.47561	3.23779	2.53008	3.19871
Aco030081	10.7367	3.37993	7.35673	-3.9768	0.538512	0.000703735	green	36.3399	45.8862	37.7249	34.5462	35.9015	35.0365	21.2873	40.136	24.8277	40.2952	35.424	20.8008	26.6393	41.6513	24.6218	30.2297	51.2219	40.927	33.677	46.0835	48.1586	29.2413	22.3667	31.5413	19.2243	33.9422	25.1064	31.5373	32.7199	31.0875	18.3631	12.3993	18.5412	31.5658	30.6022	30.8849
Aco018605	0.0486105	0.00385937	0.0447511	-0.0408917	0.205927	0.228234	green	5.56665	4.425	0	0	0	0	0	9.00164	0	0	0	0	9.51993	0	7.45546	0	0	0	0	0	0	0	0	0	0	3.26065	0	0	0	0	0	0	0	0.006683	0	0
Aco015596	22.2247	10.0822	12.1425	-2.0603	0.64307	2.33917e-05	green	38.2912	46.5609	24.6922	41.5693	51.1955	15.8103	19.1306	21.2347	9.46795	21.8689	34.1447	8.45971	17.0331	30.3262	8.02216	20.1212	32.0498	13.2069	27.6085	28.87	17.9249	12.4331	19.4756	21.8469	9.03096	11.5921	18.6634	16.4882	8.71149	8.5768	23.8586	16.3669	20.839	20.8637	14.0619	17.6191
Aco026321	8.99955	5.31186	3.68769	1.62416	0.581826	0.000197634	green	0.589401	1.19055	0.728312	0.76272	0.189645	0.289001	0.389848	0.367758	0	0.721717	0.12734	0.136755	0.421793	0.094715	0	0.478056	0.221602	0.224613	0.351003	0.538014	0	1.4249	0.416407	2.34957	0	0.236314	0.445657	0.152996	0	0.188674	0	0	0.224477	0.863229	0.615322	0.560677
Aco002277	74.5183	47.5053	27.0129	20.4924	0.878583	1.87756e-12	green	38.707	45.7488	36.8856	33.4277	37.9631	30.7798	24.5195	27.9074	20.5121	37.0306	32.8508	22.7546	32.3053	39.8916	23.2297	24.8904	27.8493	27.3445	30.2325	32.9675	34.6546	26.5226	23.4277	37.5188	17.4341	36.2812	24.3173	23.8734	20.3016	25.8973	15.857	14.6529	15.1604	29.7763	28.3547	29.2689
Aco001035	42.1529	16.5757	25.5772	-9.00154	0.664926	9.70978e-06	green	174.045	138.583	165.334	191.852	143.717	187.235	169.968	99.1683	53.0143	196.136	105.538	62.943	206.779	115.817	67.1797	173.656	78.7696	58.569	160.263	43.0468	85.7493	59.9316	94.3373	168.717	71.4847	67.0724	100.595	63.3962	46.7451	116.405	19.7009	4.78365	8.65648	21.9516	54.6741	41.2894
Aco024439	67.4509	35.8761	31.5748	4.30127	0.785204	1.42538e-08	green	60.1502	65.8499	23.2333	86.923	108.952	23.4376	1.59701	33.5845	9.52721	13.2673	62.9016	5.87331	6.75689	34.7842	1.0292	1.60581	22.3392	1.21757	0	6.79033	1.66904	1.01233	0.146623	72.2794	4.39916	10.1516	0	6.77812	0.438715	0.40091	0.122573	0	0	11.6693	16.6436	25.5172
Aco010435	2.68434	0.565592	2.11875	-1.55316	0.363535	0.0293014	green	1.08954	1.89343	1.76264	0.96379	1.43233	1.25763	0.868552	1.41186	2.34777	2.52004	1.42942	1.81189	0.822734	0.630367	1.28554	0.691704	0.360231	0.474978	0.962142	0.631456	0.575222	0.332884	0.637967	0.610447	0.5471	0.974742	1.64899	0.954785	0.533803	0.421019	0.27948	0.498749	0.448941	0.330047	0.446632	0.296243
Aco003240	176.404	80.5237	95.8807	-15.357	0.893521	2.26995e-13	green	186.476	212.353	157.921	200.43	225.507	154.953	61.2976	99.3858	39.9378	96.7327	141.477	81.4611	75.1465	171.276	57.8807	47.36	136.683	60.9338	35.2965	49.3755	49.4858	31.7608	30.497	185.991	69.324	165.677	29.2337	30.3697	11.811	51.4094	30.2349	5.41309	9.21234	57.9166	37.9874	51.5305
Aco022973	0.540555	0.143948	0.396608	-0.25266	0.357001	0.0325649	green	21.6058	26.2382	17.8702	21.4624	25.1555	16.4455	23.3155	23.9776	20.1632	19.7983	22.9503	17.2642	19.7451	22.9066	20.4196	15.9835	19.0414	22.9056	23.9441	21.5531	22.6277	21.2525	18.7105	21.2964	15.162	22.3615	10.4792	15.6798	18.4893	20.5296	21.4976	16.7297	18.837	21.0219	22.6636	26.4149
Aco011141	149.235	90.4841	58.7513	31.7329	0.94689	2.52449e-18	green	250.951	217.541	161.065	197.534	138.205	131.332	91.197	128.969	65.8184	173.488	119.871	71.002	99.1777	141.089	64.2221	42.9743	112.93	67.0676	54.48	87.3848	89.8605	58.8973	82.0458	243.554	85.5309	175.316	82.9108	95.857	56.943	75.0344	31.4584	19.6472	24.6054	101.196	93.0464	98.042
Aco000522	14.5806	2.03254	12.548	-10.5155	0.368414	0.0270436	green	28.6101	33.2109	19.0509	33.9551	22.2801	20.5763	14.6491	25.332	12.8797	18.344	31.101	22.8651	20.5884	62.2314	27.8852	7.62217	58.6201	52.6033	8.10469	43.5739	41.4805	14.1548	11.4451	44.7096	39.5916	61.835	18.7834	22.0219	15.0915	30.0631	20.9992	12.1999	12.4796	30.8402	34.6746	38.2073
Aco009208	30.146	13.7365	16.4095	-2.67305	0.644457	2.21672e-05	green	44.2192	66.9016	50.2561	30.8711	42.3892	29.9263	13.0439	21.8311	19.1344	20.2235	45.3847	26.1281	17.7246	47.0486	19.4854	11.1116	38.4364	25.5283	11.58	36.5715	29.3616	34.2331	15.5812	54.9762	13.5959	87.6071	14.1359	19.525	15.3926	14.3822	10.1074	7.13463	6.33069	63.554	53.6232	40.1232
Aco003010	180.009	76.4951	103.514	-27.0188	0.875867	2.67593e-12	green	947.378	863.586	753.028	833.34	834.625	698.828	196.419	515.503	211.468	572.326	697.471	341.513	308.438	627.419	268.42	73.8199	615.594	257.032	50.8665	117.997	286.924	11.267	41.9367	800.836	110.668	512.597	52.5721	218.358	35.3765	64.9183	173.884	76.993	88.8696	80.7509	83.4527	130.916
Aco009372	78.1501	26.7515	51.3986	-24.6471	0.732732	3.75605e-07	green	148.18	190.335	157.27	173.312	189.39	185.366	133.347	92.2906	77.8578	148.231	160.14	114.486	120.848	127.585	95.0672	87.3803	76.6312	80.2373	83.6166	38.7843	55.5481	83.7469	99.2849	104.122	67.7031	123.03	109.237	74.9585	42.3326	70.3512	53.9156	26.659	30.7017	29.1682	42.2396	39.4625
Aco021268	55.8454	42.1145	13.7309	28.3836	0.841033	1.35387e-10	green	47.295	53.5098	49.4122	34.0234	38.4443	41.8169	29.3834	38.1405	31.6787	56.0149	34.7584	29.9129	42.5226	41.3837	27.0928	28.7654	36.5951	30.2773	32.2517	22.5849	22.643	29.889	37.1338	68.9655	29.7826	45.6267	36.5757	31.8144	28.3123	28.3744	22.5669	22.293	25.994	19.0196	25.6978	20.7616
Aco016348	15.2716	3.11869	12.1529	-9.03426	0.473636	0.00352501	green	209.862	130.494	109.341	222.617	152.662	110.873	133.779	145.387	112.878	125.194	74.2615	76.312	93.6936	71.1371	89.2994	68.8469	71.9035	56.165	108.935	135.764	50.9837	84.2607	85.8631	148.576	134.497	55.3027	106.81	194.899	153.422	148.404	13.5288	9.9734	5.50624	41.6892	78.249	40.9502
Aco016257	48.9942	43.5661	5.42809	38.138	0.833323	2.84422e-10	green	94.3178	87.8364	14.6997	70.1573	59.1109	10.3488	25.6398	36.0958	0.921423	224.757	95.2512	5.02628	40.9672	83.1718	2.79618	7.46343	34.8846	4.3469	1.54394	4.25883	2.08479	0.904041	6.34384	172.046	0.146316	51.8444	8.97195	0.890103	0	0	0	0	0	1.11949	0	0.440149
Aco000793	12.679	4.67493	8.00409	-3.32916	0.631433	3.63471e-05	green	15.4057	13.9913	13.1395	10.2843	12.1639	13.3517	13.4277	13.1999	11.3356	17.0114	10.2953	10.0375	13.2946	15.5665	9.28821	9.44606	11.4024	13.0375	11.8684	12.5757	11.4549	13.1837	13.5327	14.8758	10.1264	11.264	12.2061	15.8245	10.0335	9.77792	9.08773	7.51073	7.33174	11.2429	12.797	11.416
Aco009799	17.6762	3.56413	14.1121	-10.548	0.489234	0.00246132	green	64.9527	73.3627	27.0796	80.5784	102.092	27.4996	27.1812	37.2978	15.4033	50.8014	54.6164	17.0429	35.6665	74.4171	17.1373	17.1598	106.03	33.4769	13.9328	60.4165	32.0494	0.646779	7.4868	57.9934	47.9919	41.5808	6.54375	17.111	20.781	59.987	46.919	48.5033	33.1412	93.8411	55.8162	75.8899
Aco014464	7.55777	3.32405	4.23371	-0.909662	0.620908	5.33321e-05	green	0.246454	1.02269	0.432776	0.236925	0.660784	0.222462	0.188777	0.273155	0	0.106515	0.275013	0	0.415819	0.358755	0.195175	0.585569	0.522756	0.180892	0	0	0.232531	0	0	0.291222	0.110797	0.371655	0	0	0	0	0.070472	0	0	0	0	0.286812
Aco028994	69.8173	30.5827	39.2346	-8.65184	0.789977	1.01239e-08	green	120.111	88.1634	57.8538	101.448	86.2699	47.8409	76.2611	45.7768	19.2491	122.527	77.1473	19.7022	77.817	73.8381	23.2121	60.3724	66.5498	35.297	31.4376	43.4386	54.1092	99.869	80.4282	87.4619	30.9013	73.9377	68.0116	45.4324	11.691	12.1847	2.61382	2.46079	1.34313	48.9429	34.4586	39.5044
Aco010968	82.3739	34.9985	47.3755	-12.377	0.743047	2.10113e-07	green	414.331	320.533	184.34	354.828	227.76	134.634	183.134	74.3879	28.1307	332.095	82.1647	26.7881	190.238	86.9862	38.6235	132.788	66.6401	43.7166	155.107	73.216	76.9099	261.46	147.905	215.666	69.0331	109.628	135.671	62.4808	15.0533	24.286	8.85206	6.50245	11.7156	47.2198	45.7371	46.0901
Aco005416	5.82694	3.55781	2.26913	1.28868	0.196433	0.250872	green	239.715	229.571	161.034	350.3	283.188	149.522	348.536	203.966	154.165	326.519	715.33	288.871	405.153	476.887	311.883	135.846	818.912	358.435	58.8461	168.668	409.497	16.7835	97.2584	1707.51	1053.2	867.632	87.2794	507.567	642.445	560.2	577.874	552.661	754.164	698.044	809.361	407.14
Aco013228	7.59459	2.82137	4.77322	-1.95185	0.492719	0.0022663	green	36.1423	253.139	16.0113	82.9657	274.153	18.9027	65.9143	190.938	21.9504	184.752	243.345	25.6539	128.86	280.412	34.7817	32.3135	241.815	50.3767	41.2751	323.592	33.19	43.6192	19.5562	102.245	109.204	48.1387	49.3145	16.9438	15.9011	20.842	125.222	17.6307	25.1063	79.3872	30.6283	35.5993
Aco015724	53.5204	29.2877	24.2327	5.05501	0.793276	7.95016e-09	green	80.8279	105.01	59.3564	65.5656	86.9329	44.531	42.6605	32.9261	17.6846	45.7314	37.7631	29.1659	48.684	52.1271	23.7553	47.8554	41.1688	16.0633	36.6976	38.492	22.287	66.6047	44.7943	87.8896	18.9559	39.554	40.4244	32.6722	21.8224	27.7647	32.2031	31.6243	32.4926	30.1297	33.6824	34.7509
Aco023636	25.178	10.8389	14.3391	-3.5002	0.652354	1.6239e-05	green	24.9168	35.5004	33.3638	24.2201	25.647	34.6508	21.0992	21.4196	25	31.4572	24.9	35.993	23.8782	24.6086	23.8844	18.0064	21.6784	26.9381	18.7189	7.22585	8.75755	8.84893	17.1458	38.9411	13.5077	54.7985	19.1247	13.0314	9.08896	10.7645	8.77549	7.31456	8.23027	8.47737	12.0562	7.52763
Aco008992	2.10366	0.286958	1.8167	-1.52974	0.336785	0.0445902	green	5.09742	4.05191	4.8234	3.80749	3.83574	4.08529	3.1916	2.6557	2.71841	3.57046	4.30857	2.06921	4.37582	3.77522	3.07261	7.35473	2.20432	1.2427	2.50373	0.844579	1.14619	1.88065	2.97434	7.21418	6.57747	4.0236	2.20547	2.95329	5.15147	5.60107	4.5979	3.11709	2.61669	2.4286	1.56897	1.7894
Aco024504	5.69002	3.66359	2.02643	1.63715	0.484683	0.00273799	green	0.826498	0.878838	0	1.60628	1.24022	0	0.1449	0.418011	0.091619	2.06727	0.52697	0	0.719831	0	0	0	0	0	0	0	0	0	0	0.430365	0	0	0.13295	2.47164	0	0	0	0	0	0.167144	0.156658	0.058832
Aco012809	49.8511	43.9979	5.8532	38.1447	0.854135	3.48896e-11	green	14.5494	22.2195	6.55729	24.6836	32.0653	7.58988	11.5028	16.1736	1.68905	25.38	28.9151	5.96404	14.8583	21.5076	2.22337	10.3736	17.1973	2.1458	13.9538	3.11053	2.06719	10.5823	6.36177	43.4143	4.63771	15.6395	6.21579	7.95858	3.73083	5.9019	4.92945	2.8709	2.5483	9.79049	9.78941	8.82469
Aco017107	52.9575	30.7578	22.1997	8.5581	0.790638	9.64849e-09	green	105.593	103.588	76.7894	82.4183	75.3853	59.9776	68.8759	56.1512	40.6163	94.2972	68.4908	30.3138	63.5884	68.6966	34.1794	48.0546	64.2006	41.978	65.1526	95.3915	51.4043	71.642	61.0565	84.9895	32.9676	70.3442	58.0829	64.044	58.3664	49.5353	36.4463	30.5901	31.6138	72.8655	68.8606	76.1686
Aco028003	17.1662	16.2585	0.907736	15.3508	0.428316	0.00915676	green	0	0	0	0	0	0	0	0	0	0	0	0	0	0	0	0	0	0	0	0	0	0	0	3.03933	0	0	0	0	0	0	0	0	0	0	0	0.240404
Aco005372	2.9353	1.63998	1.29531	0.344669	0.319272	0.0576911	green	4.07928	7.66566	0.992665	5.78407	12.2336	0.760099	6.9436	3.35186	0.432513	4.22724	23.8618	1.71139	7.19765	8.04224	2.21603	2.77188	7.6659	4.3389	0.562576	1.1672	3.57079	0	1.0859	38.6796	25.4995	3.29704	0.393191	39.5046	17.6643	8.21934	0.258064	1.68362	0.69063	0.228277	0	0.407953
Aco014380	4.20918	2.22109	1.98809	0.233008	0.0235731	0.891453	green	46.3197	54.2438	63.4793	42.4548	62.0596	59.9355	59.3804	63.9313	78.6667	56.8648	113.35	89.0345	77.4548	92.2392	91.4801	58.6094	85.0923	89.6375	83.8746	56.3581	54.2415	134.272	82.7261	220.393	213.169	166.176	85.7746	126.706	144.523	125.508	57.6126	74.4625	77.8616	80.3488	103.319	71.1308
Aco011501	4.18507	2.34083	1.84424	0.496581	0.482233	0.00289788	green	11.4907	11.2175	4.87167	6.67661	7.01403	3.0515	3.80722	5.83262	4.87027	15.0843	10.7914	2.00093	4.26551	9.70469	3.12171	0.815205	6.51662	9.2601	1.95815	4.15128	6.98583	2.20791	1.64377	24.189	1.74715	20.0943	2.70662	0.949624	3.59093	2.13264	4.44605	19.4299	13.9958	8.05347	6.20232	6.43057
Aco018703	28.8423	24.0542	4.7881	19.2661	0.783068	1.65674e-08	green	3.30482	4.65475	3.53379	2.21144	3.58389	3.08342	1.62185	3.21234	1.1699	2.43528	3.07134	0.738564	1.81862	2.29173	1.40964	1.52738	1.83531	0.995837	2.85178	2.12013	1.63268	1.12675	1.41331	8.01547	1.30742	2.36101	1.7612	1.47196	1.11563	1.38444	1.88131	1.66296	1.23639	0.844611	0.93105	0.637353
Aco028349	52.0796	39.2946	12.785	26.5096	0.837361	1.9373e-10	green	81.1432	116.631	40.4075	169.311	127.447	25.6618	50.0136	43.6745	2.56488	91.5708	100.407	15.2307	78.9708	97.5625	3.65544	32.0597	141.007	3.46712	2.46748	14.6479	7.85404	3.98487	3.2303	151.622	17.0411	46.7377	12.682	41.9407	2.68941	6.55055	6.30156	0.263016	0	67.2105	29.4538	68.9611
Aco018905	12.8487	11.4331	1.41561	10.0175	0.714956	9.63027e-07	green	5.52658	5.60751	5.6534	5.30557	3.92857	5.89663	3.99761	4.62071	4.03023	13.3604	5.46578	1.74969	11.7023	12.8095	1.30896	2.89731	11.9027	4.41763	1.93692	7.11424	6.4002	3.93813	1.44839	16.273	0.642755	5.27861	1.481	0.980233	1.4227	0.31029	0.516478	1.29392	1.80049	3.16121	1.46003	2.10666
Aco011968	79.191	42.212	36.979	5.23307	0.841589	1.28144e-10	green	2535.02	1699.34	1442.89	1816.47	1258.64	1242.2	671.344	545.781	454.335	1139.83	719.888	345.522	743.136	929.562	335.864	621.367	616.372	445.213	417.255	479.496	1259.24	188.987	351.08	1976.42	602.264	1869.57	271.695	293.11	382.948	439.536	237.136	259.96	287.016	635.961	539.707	677.887
Aco004907	21.2745	11.4609	9.8136	1.64725	0.676672	5.87309e-06	green	15.3676	7.33256	8.48029	21.4913	18.8467	10.7192	10.7411	11.2734	3.09146	14.4969	7.0838	4.08049	14.6476	12.427	4.45194	8.6016	13.2887	4.56294	4.14484	8.19649	4.47401	2.28021	3.89088	7.90074	6.7153	5.22331	7.29043	3.67046	3.28592	4.45193	2.27972	0.854866	1.92329	3.88029	5.42313	7.83607
Aco026878	0.390795	0.283843	0.106952	0.176892	0.0845243	0.624044	green	0	0	0	0	0	0	0	0	0	0	0	1.91205	0	3.02814	0	0	0	0	0	0	0	0	0	0	0	0	0	0	0	0	0	0	0	0	0	0
Aco020625	53.3659	23.5924	29.7735	-6.1811	0.724496	5.86224e-07	green	397.998	503.631	353.04	476.681	687.453	283.991	20.0636	193.286	30.8815	40.6054	445.996	107.606	49.2023	382.612	48.0232	14.3126	523.544	73.4746	1.40265	28.3114	56.1668	2.74135	0.951411	495.729	55.5349	408.033	0.537499	105.374	1.12355	49.9255	165.926	10.214	15.7032	405.824	289.964	421.817
Aco001862	17.4461	8.69373	8.75241	-0.0586755	0.691529	3.0079e-06	green	178.335	165.445	154.758	143.192	140.51	149.295	129.476	134.288	126.447	172.401	143.779	120.206	135.451	158.834	114.067	167.093	141.459	132.745	126.146	132.968	135.262	124.587	150.26	194.892	104.134	187.811	136.507	135.443	86.2446	93.257	135.457	110.779	136.745	97.6624	89.9942	83.7229
Aco004594	5.63523	1.52956	4.10567	-2.57611	0.506473	0.00162221	green	63.3497	70.0237	76.4853	51.5796	66.6018	71.4769	47.5635	56.2885	44.0963	65.309	47.0178	55.4316	60.3526	65.843	49.4428	35.5744	52.2511	57.8466	54.6544	53.0064	51.186	70.8005	55.106	74.3274	53.6524	78.9753	52.9244	39.7187	43.2867	50.7809	67.3801	52.8243	68.3867	57.4553	56.6537	51.9008
Aco009864	42.6076	24.1154	18.4922	5.62318	0.738833	2.67252e-07	green	22.9366	31.022	16.1412	26.6319	26.2905	14.4068	25.5849	19.089	4.75433	60.1198	34.2269	4.12096	39.9231	29.6157	1.7263	20.8026	16.3651	3.85687	34.7133	8.21524	4.04377	12.7627	12.815	33.8455	3.72826	8.52756	11.7877	6.54748	2.90449	2.8601	0.574566	0.714266	0.410532	4.63577	6.16813	5.97585
Aco000903	82.3422	50.2691	32.0731	18.196	0.851587	4.58751e-11	green	235.308	188.365	166.532	243.015	199.667	171.099	134.569	125.373	70.6524	258.501	136.379	85.9685	155.66	126.825	65.834	81.0385	76.324	47.0824	84.8014	142.749	84.7292	89.8631	102.63	266.105	161.855	95.6944	114.647	143.896	69.5931	98.6354	50.0014	18.9468	29.1949	62.8112	87.0968	61.1506
Aco012475	10.5914	2.04448	8.54687	-6.50239	0.508809	0.0015305	green	1058.68	1020.28	878.769	1565.12	1945.24	1535.59	413.945	889.029	595.615	1757.53	1988.8	987.355	665.904	930.67	248.706	241.769	417.265	164.912	134.167	131.914	61.5337	103.83	250.482	2509.31	4224.25	1236.84	36.2751	504.652	826.92	899.197	0.908708	1.56203	1.76963	36.4676	90.3972	42.5126
Aco001815	41.7676	36.1829	5.5847	30.5982	0.802737	3.87819e-09	green	9.82285	14.6963	7.01067	19.273	17.7274	6.59465	11.3382	11.1213	1.11309	41.1396	24.1563	5.71705	23.9732	22.1273	1.29311	9.69331	14.0073	1.69477	2.68699	5.33967	1.76169	2.95842	0.569499	39.1133	5.19642	10.0382	2.22055	6.57097	1.46961	4.42823	3.88075	0.337029	0.092085	1.62623	2.88046	2.04148
Aco022451	124.418	62.2856	62.1324	0.153193	0.902841	5.1494e-14	green	705.354	658.658	573.637	723.965	592.995	476.729	420.897	421.266	323.642	505.316	479.378	311.728	372.587	509.109	282.772	231.795	510.232	293.482	304.445	436.944	311.229	243.231	392.708	587.461	338.266	639.881	326.194	340.362	223.573	229.412	154.611	156.713	187.147	383.573	339.338	374.828
Aco012471	25.4527	24.0654	1.38724	22.6782	0.597802	0.000118097	green	9.39499	6.78378	1.40695	10.8596	7.08033	0.543759	1.9103	2.32128	0	16.0251	11.3089	0.091239	12.4606	9.07927	0	0.883747	4.98675	0.304509	0	0.110505	0	0	0	108.364	0	13.8997	0.141943	3.83376	6.25403	0.757934	0	0	0	0.867233	0.120261	0
Aco009086	26.1786	13.742	12.4366	1.30542	0.716933	8.70329e-07	green	28.4883	31.336	21.3886	14.2128	13.5257	8.12166	6.69153	6.17338	2.43515	31.891	7.02261	1.3548	8.17529	4.88533	1.48541	1.31698	1.89451	3.75474	1.09651	0.860452	3.40728	0.18367	2.00708	16.9587	4.0891	13.9308	7.45599	7.21791	1.95344	1.76833	4.22269	12.3887	8.59087	8.81235	15.2135	7.32399
Aco009405	25.2263	10.7718	14.4545	-3.68274	0.635547	3.11674e-05	green	37.6453	36.2711	33.5083	32.1574	28.6665	25.0871	30.7241	21.1044	23.7975	40.4406	27.9319	20.7678	35.2072	28.4341	23.1151	31.2097	31.9427	27.8067	33.9101	38.8213	37.355	27.6384	29.7793	36.68	15.6805	39.8844	31.9432	26.4846	18.0154	18.072	22.4985	20.2206	21.0858	31.5223	25.5256	28.7284
Aco012353	72.0782	9.59182	62.4864	-52.8946	0.57914	0.000214944	green	230.765	378.966	340.976	297.26	415.526	393.318	49.1285	280.071	239.039	149.466	413.582	254.777	69.4334	356.989	229.088	17.5437	493.628	339.857	21.6026	232.874	365.471	2.38097	13.1934	324.227	132.148	493.378	10.2246	120.593	172.845	134.84	11.2423	26.8531	16.5931	156.655	166.856	164.818
Aco015821	116.137	57.4001	58.7369	-1.33678	0.859585	1.90841e-11	green	72.0542	70.9846	76.0979	59.2846	55.5161	66.2965	36.2225	51.9075	41.1439	50.7152	46.2653	39.4883	40.8724	55.4338	37.3721	31.4353	48.3723	42.5715	31.7084	38.5907	37.4699	47.0096	41.4693	78.6107	29.6217	63.6962	37.4111	29.6676	25.5043	29.0259	27.0282	21.3426	24.076	26.8368	30.0772	27.4719
Aco009558	106.447	76.6288	29.818	46.8107	0.906928	2.56133e-14	green	1117.74	1634.92	374.884	1164.89	1053.52	284.342	187.026	413.244	182.701	912.227	923.156	72.1848	387.084	655.038	57.7321	80.198	312.843	75.7113	46.2448	33.6961	36.8155	129.558	115.183	1447.76	159.568	431.903	304.937	521.311	177.971	85.1699	12.6489	14.1006	16.744	456.079	421.999	311.566
Aco009258	116.634	81.2858	35.3484	45.9374	0.898746	1.00582e-13	green	143.499	154.603	100.415	146.97	124.687	95.9248	94.6179	75.864	25.0922	190.999	120.001	43.768	109.301	109.488	33.4637	51.2057	57.64	34.8843	26.6429	30.6205	40.9488	33.9805	37.7754	158.59	56.9836	75.4054	35.81	89.1992	46.9467	64.1126	31.4976	16.9713	17.5297	20.9431	33.7726	24.7031
Aco004941	13.2148	1.83019	11.3846	-9.55439	0.432201	0.00847835	green	181.535	150.407	185.551	226.635	192.765	217.494	145.991	153.961	124.88	239.169	200.668	160.957	227.855	256.448	158.501	125.333	203.33	191.109	105.552	128.566	155.449	83.6888	77.5972	194.457	272.458	213.082	78.7122	200.118	153.018	328.923	118.933	71.1658	66.4872	148.985	159.527	205.97
Aco013262	8.81753	7.78682	1.03071	6.75612	0.284303	0.0928613	green	10.2072	6.03631	6.38879	8.74323	6.33443	3.88523	12.9667	6.67309	3.81004	18.3021	11.8359	4.57563	16.0821	3.93125	2.15899	1.9127	1.98403	1.27312	2.90759	0.386644	0.944936	0.341199	5.14357	98.4868	43.2888	7.62973	2.38473	31.3369	22.4263	17.3933	20.2186	22.1937	17.6097	5.90546	9.52102	3.54567
Aco004425	58.8073	14.6717	44.1356	-29.4639	0.713143	1.05592e-06	green	188.748	201.807	203.052	164.189	195.385	186.638	132.432	154.537	115.407	176.412	142.321	112.153	127.693	167.774	98.8118	84.7	132.426	102.579	110.964	143.1	108.664	146.818	131.641	169.629	203.168	136.819	148.576	136.959	91.8358	162.277	70.4839	36.294	40.3002	87.6704	93.4399	65.1221
Aco029392	17.0778	8.98442	8.09333	0.891089	0.703228	1.72637e-06	green	24.4382	35.3871	27.8061	23.9846	38.0087	30.882	18.9621	22.1159	19.1569	24.6092	20.7888	12.163	16.1008	30.8577	10.4707	20.3813	26.9487	12.3567	16.146	17.4121	6.44322	19.5644	21.159	34.1449	21.6626	21.0169	16.4958	18.2562	18.2582	14.5034	18.4895	13.7887	12.1395	31.1848	27.08	28.7899
Aco016543	26.3512	12.1342	14.217	-2.08282	0.703418	1.71056e-06	green	91.6701	84.6383	62.5922	62.6552	56.8947	61.437	33.4244	50.2049	27.4984	59.7081	42.0622	10.6769	32.9486	33.1176	6.13014	13.3245	24.3791	8.06049	22.6447	32.476	14.1841	15.6252	35.6456	99.1371	31.8508	47.4487	28.7139	44.0911	23.2929	29.0617	52.7881	36.3708	53.9479	66.1946	57.7212	44.6202
Aco015113	3.01831	1.83309	1.18521	0.647875	0.441967	0.00695989	green	11.5279	10.7912	11.1665	10.9984	9.22946	10.9667	6.09152	8.70068	2.61525	5.78911	9.96679	7.41003	6.63194	14.6788	4.83976	3.67281	12.7316	11.8549	7.10713	8.04579	3.96287	16.971	14.6877	21.176	4.17301	40.3555	21.5712	7.74798	6.85044	2.65946	2.89818	1.60298	2.28019	10.1407	10.4596	10.2625
Aco010846	11.592	5.82882	5.76319	0.0656343	0.600005	0.000109763	green	13.7136	6.30443	1.76243	13.9855	8.35788	1.98585	1.79378	2.04636	1.50426	3.69259	0.412596	0.814515	0.338251	0.174851	2.75383	0	0.366269	0.92996	0.078829	0	0.138591	0.205512	1.5835	16.0912	6.7401	0.471452	2.54532	6.78136	4.57851	3.20986	0.156755	0.553441	0.377602	1.88442	0.901403	0.232203
Aco014500	14.2874	5.60916	8.67828	-3.06912	0.562853	0.000352218	green	32.5055	14.503	3.46629	28.197	15.9875	3.36712	5.0362	8.00901	3.36348	21.6931	6.03723	1.81074	8.88059	4.55098	1.57916	10.8623	1.63749	0.708048	11.7907	0.656448	0	6.44307	4.79687	13.6392	6.72792	0.193501	7.49135	27.9121	4.26114	0.948733	0	0.291106	0	4.85768	8.56824	2.82754
Aco006004	15.8049	9.13068	6.67424	2.45644	0.650826	1.72588e-05	green	3.75096	8.24063	0.313956	6.9322	9.07151	0.368492	13.281	1.94884	1.31378	18.3625	3.43399	0.503231	6.15871	5.10788	0.673586	1.37821	3.8734	0.205177	3.96201	4.33341	0.528389	0.165891	1.67695	10.8389	0.614541	1.52355	1.53588	5.18615	0.671153	0	0	0.156047	0.134607	0.948058	2.48929	2.57487
Aco006060	116.559	96.2	20.3589	75.8411	0.935222	6.74597e-17	green	1699.32	2027.52	688.089	1583.55	1618.41	539.687	652.798	861.813	120.973	1671.71	1616.42	190.799	1152.46	1672.15	87.9335	334.745	1020.21	139.34	149.402	251.291	93.0394	64.1361	341.599	2972.19	197.57	901.203	199.958	449.221	154.456	173.93	314.703	101.371	129.803	171.369	174.157	172.38
Aco000851	5.56405	1.17787	4.38619	-3.20832	0.462067	0.00455287	green	71.4253	78.4125	79.5321	52.6086	58.4806	58.0522	36.4054	61.0186	65.2571	89.7785	60.4763	58.3886	35.4448	44.319	53.3422	24.7744	34.8878	50.9517	24.4103	34.664	42.4253	43.8623	34.7789	62.6847	29.2127	114.842	46.1683	70.9206	76.1569	50.3568	44.206	50.0407	43.8885	40.5459	42.7695	41.7118
Aco018944	32.8076	8.087	24.7206	-16.6336	0.62736	4.22307e-05	green	85.5516	102.021	98.3362	78.9461	100.29	88.1564	76.789	75.2034	80.3769	109.77	86.022	73.7252	87.8918	76.9035	64.4528	66.2654	54.4482	53.4679	71.5241	38.1891	46.5599	128.928	77.6971	112.061	68.143	84.7615	73.9409	74.517	81.2266	66.3646	29.1997	39.3355	33.64	39.3131	51.9217	42.0625
Aco008271	5.40988	2.18103	3.22884	-1.04781	0.474187	0.00348155	green	35.3828	25.9132	31.4679	29.9677	18.2184	27.1721	40.2229	24.861	22.8895	41.8278	19.4362	19.3082	47.5345	29.8283	19.703	40.7516	26.4857	37.5818	33.6791	31.862	42.322	18.1449	41.077	78.1464	22.133	63.5969	47.0131	27.5372	20.9392	27.766	12.8149	10.4444	14.4361	34.1285	30.0239	30.9367
Aco008734	8.63118	2.21948	6.4117	-4.19222	0.476451	0.00330777	green	2.74246	5.22469	2.22046	4.31184	6.83647	1.39331	1.1437	3.68353	1.11477	2.64269	9.70156	0.220554	2.25868	8.11684	0.357626	0.431649	5.90412	1.04186	0.151649	0.781332	0.191308	0	0.33934	5.19804	3.53772	0.765679	0.488008	6.80215	1.77935	9.87654	0.157567	0	0.062431	3.3046	3.93289	3.15229
Aco017198	4.38453	2.41359	1.97095	0.442639	0.516707	0.00125336	green	22.4198	15.4975	6.93021	37.0959	14.7612	6.18111	12.4476	11.757	1.98462	27.2964	15.9211	2.91011	14.9656	11.7715	2.22043	3.53466	23.0683	13.1165	3.56768	16.4819	24.9967	0	0	7.57556	5.20515	2.91817	2.61281	23.802	3.92712	10.6197	2.4836	2.11746	1.25426	1.63977	6.82928	9.37458
Aco009042	4.80978	3.42726	1.38252	2.04474	0.544424	0.000597706	green	0.873169	1.27739	0.428363	1.04757	1.36975	0.49188	0	0.957146	0.163579	2.07908	2.29496	1.18344	1.06029	2.68952	0.644196	0	0.313183	1.84309	0.37611	0.109624	0.641044	0	0	0.720638	0	3.77253	0	0	0	0	0	0.424474	0	0.194247	0	0
Aco016068	23.0248	13.7633	9.26151	4.50177	0.734482	3.40982e-07	green	12.5416	16.2229	16.0752	10.0345	12.4639	15.2187	9.40089	7.98452	5.82673	15.7221	11.6065	7.89713	11.4117	15.7758	7.42001	9.26095	11.2908	6.96555	13.4147	6.6332	8.70167	12.5113	7.17584	13.4852	9.50534	10.9756	8.82223	8.66162	7.21319	9.25777	9.05094	7.32101	8.63162	6.23188	9.14429	8.12773
Aco018945	14.9858	1.19927	13.7865	-12.5873	0.467399	0.00405081	green	11.0309	12.8023	12.5015	11.2582	12.9086	12.3547	12.7207	11.3651	10.6521	9.36992	11.6995	8.88831	11.8557	14.6818	9.19459	10.0048	10.9198	10.7881	7.20834	9.72056	9.01442	14.8567	10.7593	8.78553	8.18422	12.5599	13.8914	5.52439	4.58839	3.40364	2.77991	6.71067	5.94078	3.37021	4.49442	4.78427
Aco018248	28.1008	17.9121	10.1887	7.72337	0.730843	4.16571e-07	green	16.8347	18.378	26.5913	9.2425	12.8906	16.3208	12.5124	9.71444	4.7264	19.3151	12.6772	5.81381	10.2227	13.9806	4.00599	7.21018	6.44809	3.18987	8.60868	4.34373	2.88779	7.60306	14.2441	28.8072	8.46695	10.189	12.1062	11.5803	7.49924	12.0351	7.60529	5.60565	7.22035	3.66583	5.28638	4.07416
Aco023791	1.95023	0.783092	1.16714	-0.384044	0.467334	0.00405663	green	252.67	300.678	216.558	255.959	268.967	217.954	256.431	248.159	165.672	387.776	254.028	190.846	387.709	316.612	200.518	227.268	273.11	315.712	284.579	343.377	311.035	194.649	217.538	300.078	197.521	297.761	222.091	269.557	223.179	294.181	209.296	262.052	201.443	285.773	246.453	232.748
Aco007119	145.644	62.3968	83.2473	-20.8505	0.86245	1.37556e-11	green	152.995	150.248	140.409	99.8387	104.821	110.031	50.1308	66.816	52.7011	86.0589	78.4162	54.318	63.5889	81.4047	45.6242	34.3787	70.1431	53.1605	40.1024	54.8325	61.472	46.8661	42.8251	144.039	47.3085	105.436	42.3189	60.3502	39.0892	45.8036	61.9932	49.3185	57.5064	65.4499	60.3541	66.7615
Aco015275	2.84998	1.19604	1.65394	-0.457904	0.474333	0.00347006	green	29.0297	34.9205	37.3876	21.9506	33.3529	32.8721	23.4614	29.8853	23.7288	35.1754	31.8135	23.704	39.0138	43.8272	22.783	19.5765	25.7812	32.8447	36.5161	33.1246	23.2176	38.2396	29.4034	41.5823	26.8327	36.3699	27.6394	25.0848	34.2322	35.13	23.7119	25.6866	21.9736	37.9101	38.1705	32.3542
Aco005350	10.8213	2.85806	7.96326	-5.1052	0.573847	0.000253079	green	282.235	350.827	207.889	269.243	330.457	204.319	231.378	239.727	164.221	251.509	294.288	194.25	266.786	292.587	192.83	297.985	300.613	190.828	278.549	259.03	280.993	163.262	222.883	243.382	175.711	181.026	195.271	227.842	282.854	259.058	155.006	135.088	123.208	185.377	236.742	235.402
Aco013937	44.8627	33.3878	11.4749	21.9129	0.82762	4.8099e-10	green	26.5205	42.0285	29.8891	20.0601	30.6884	25.6737	17.48	28.6577	3.08226	19.7331	29.7632	5.58901	16.4454	22.1798	2.67253	5.78726	29.4234	3.08419	0	2.33646	0.950942	0	4.69175	68.6727	2.87881	6.10511	2.36686	2.61101	0.486658	1.95016	1.82856	4.25198	4.62786	20.2425	25.1426	15.6532
Aco009875	20.5987	18.8549	1.74381	17.1111	0.741751	2.26352e-07	green	54.1455	56.8616	27.144	56.4938	64.7876	34.0961	49.4988	44.3045	7.57864	160.457	142.814	13.4298	87.0346	131.508	9.60973	37.2613	73.7091	22.4078	32.7328	24.6629	47.6777	13.3508	18.4649	152.149	3.79172	24.6676	16.5036	10.7811	16.3126	9.7078	5.89996	10.3532	5.89989	28.0544	36.5571	68.8288
Aco022739	46.9466	32.5288	14.4178	18.111	0.817979	1.12088e-09	green	0.430436	1.34861	0.383543	0.755384	1.14123	0.418552	0.266703	0.396925	0	0.469025	0.782933	0	0.113549	0.403467	0	0	0.077798	0	0.13251	0	0	0	0.232418	1.45516	0.349207	0.042213	0.379521	0.097146	0	0	0	0	0	0.178105	0.189381	0.288007
Aco005177	3.16899	0.522858	2.64613	-2.12327	0.300902	0.0745406	green	7.27736	13.1738	7.41467	8.71663	9.7529	7.40163	6.55682	8.85972	4.58938	11.7305	7.56655	2.15407	8.78503	8.10662	4.27552	7.96442	5.75912	2.17488	2.81869	0.679717	0.492257	7.56954	2.29146	6.77773	7.89767	3.95208	1.71664	16.1511	8.70059	8.45817	10.0138	7.72028	8.71122	4.16451	7.82896	3.19028
Aco004515	20.985	14.4295	6.5555	7.87401	0.701656	1.86299e-06	green	12.1861	23.1257	15.5623	11.5238	22.3677	12.4437	9.80816	17.4728	6.5547	9.24169	25.2333	7.33063	8.46426	26.9114	4.93941	7.12075	15.9098	5.29985	7.61242	10.8531	8.49326	12.5851	7.47081	20.6469	3.97697	26.5745	7.05462	8.0484	5.08672	5.85198	4.79205	5.36174	6.83397	19.7955	14.5495	17.0394
Aco003937	12.1335	11.609	0.524491	11.0845	0.498098	0.00199177	green	0.361593	0.927519	1.59034	0.146488	0.205047	0.376804	0.28958	0	0.210664	0.888668	0.883254	0.07291	0.249395	0.27172	0.23623	0.403764	0.306472	0.503735	0	0	0.194019	0	0	5.79906	0.651424	0.385957	0.205029	0.571738	0	0.19871	0.041009	1.08965	0.534736	0.979858	0	0
Aco006886	10.9335	0.685725	10.2477	-9.56202	0.291019	0.0850726	green	28.756	33.5702	38.2291	29.6605	35.1531	44.4175	23.3717	37.6298	37.0264	34.7293	47.6726	49.2164	33.3389	44.8815	42.2249	29.2727	42.6778	44.6477	33.948	50.5792	60.5069	18.7638	18.1603	49.8005	49.6803	33.0371	21.2469	24.7206	16.6644	51.7941	25.5573	11.4011	12.4848	19.4663	20.142	21.3884
Aco014530	11.9209	4.7295	7.19137	-2.46186	0.537297	0.000727485	green	15.1838	16.09	7.36532	15.2974	12.7554	8.13991	12.5823	12.2146	6.94289	24.224	24.2483	5.16592	24.1134	28.3305	9.38106	13.1301	27.6129	25.4793	15.2493	40.9113	23.53	9.13811	12.2169	30.1527	8.44644	28.1088	13.6629	6.89303	6.17883	5.79716	0	1.1691	0	11.121	10.0793	13.665
Aco005791	159.961	66.7297	93.2317	-26.502	0.857107	2.51852e-11	green	391.663	383.588	283.198	349.827	505.705	254.537	52.0484	149.115	29.8323	180.133	257.376	93.3969	87.6402	235.812	50.6162	22.3037	174.439	57.138	16.576	46.5346	41.7035	25.245	22.0089	331.21	110.257	249.756	26.2451	72.7647	26.1987	99.162	119.577	30.7869	32.9268	126.912	60.3265	132
Aco002130	36.804	4.11047	32.6935	-28.583	0.588244	0.000161226	green	109.069	273.518	158.977	115.538	266.951	150.202	41.6611	251.834	139.475	167.927	228.089	95.7262	86.5375	242.882	117.833	28.9352	217.481	216.369	66.8544	190.405	99.7391	156.248	45.3888	171.726	158.406	219.81	44.2881	92.7561	125.846	109.681	15.6207	16.1734	12.7096	174.909	175.8	109.289
Aco002362	14.7235	3.96728	10.7562	-6.78893	0.509957	0.00148715	green	33.876	34.0515	36.306	26.5663	27.4031	29.8734	26.1025	26.1935	23.5648	29.6917	26.0116	27.6281	28.3539	26.0585	22.3279	19.6164	17.7509	21.9878	32.9207	16.0977	19.6531	33.2737	30.503	29.0172	21.8203	27.2145	28.6059	29.3736	24.2555	29.3666	23.2866	16.911	16.8977	20.4252	23.2479	19.825
Aco002851	0.265714	0.0557991	0.209914	-0.154115	0.348063	0.0375054	green	0	0	0.461667	1.32482	0.900218	0.249828	1.43064	0.415928	0	1.10318	0.714056	0	0.733209	0.517798	0	0.324989	0.97104	0.234428	0	0.530368	0	0.924013	0	0.724051	1.32805	0.731388	0	0	0	0	0	0.206863	0	0.349092	0	1.53998
Aco013155	7.4675	3.98848	3.47902	0.509459	0.220127	0.197036	green	0.775446	1.65407	0.659514	2.18829	3.59503	0.841812	15.9542	3.50205	1.40517	15.7098	11.973	2.81473	32.5351	10.9617	2.93846	20.7032	16.9052	7.59459	19.3388	12.6375	14.5761	13.3755	13.8573	85.9915	61.5526	3.26138	7.03778	5.50704	6.13156	4.74977	0.416139	0.337055	0	40.3062	30.2308	33.9076
Aco014022	141.897	97.1099	44.7869	52.323	0.924724	7.98691e-16	green	535.089	508.551	341.851	548.548	440.473	294.166	143.815	183.503	49.0548	298.811	428.154	103.311	217.837	478.648	60.3745	85.3908	317.701	105.058	23.0024	54.0105	77.6748	35.3981	28.519	822.307	126.608	300.58	41.5258	87.312	45.3405	83.2109	78.7978	51.4406	60.3155	70.1141	75.1309	101.032
Aco016519	4.46315	0.97008	3.49307	-2.52299	0.348296	0.037369	green	9.63531	5.73892	3.46828	16.8209	7.93928	5.02225	0.499536	6.96668	3.39272	1.01234	20.6101	5.46377	2.18484	5.13247	7.32883	0	1.58783	5.3797	0.148343	0	1.91311	0.097302	0	23.8952	32.7181	1.74677	0	10.4065	7.32867	5.27246	0	0	0	6.36732	4.08379	5.32722
Aco005657	39.1937	32.0071	7.18655	24.8206	0.785754	1.37091e-08	green	81.1943	76.1709	19.014	118.059	96.2469	20.1083	9.36527	41.1088	2.35115	67.7978	215.51	12.0326	35.1834	100.623	2.33225	7.0556	74.6983	8.46391	1.08171	2.75947	2.56063	0	0.675411	191.772	2.29025	31.5519	0.355803	10.2004	0	0.447342	0.163008	0	0.133975	1.26192	1.31774	2.38559
Aco023269	95.8044	72.1135	23.6909	48.4226	0.870628	5.1817e-12	green	2324.27	2258.47	863.042	3003.48	2494.64	806	1320.88	854.1	143.367	3381.66	1782.03	275.721	1792.65	1578.74	183.375	521.094	1105.69	292.694	221.986	338.56	291.969	182.653	284.762	2036.22	265.97	938.096	536.136	594.726	123.467	243.311	369.868	66.7364	60.2578	258.08	240.419	264.154
Aco011016	7.989	6.44488	1.54412	4.90076	0.570003	0.000284465	green	10.8409	15.2254	11.5916	9.99197	15.4439	10.556	11.8837	21.5407	9.37739	17.6908	19.5262	11.0478	16.9044	26.6375	10.5623	12.186	23.4809	13.2391	13.2672	16.8721	12.3457	10.8107	8.70361	27.7812	15.1034	17.119	9.40786	14.5722	13.1395	13.3943	11.6261	8.92334	10.0527	12.8048	13.1114	10.8029
Aco022291	60.985	44.692	16.293	28.3989	0.866941	8.1109e-12	green	87.9068	113.034	81.4758	85.2819	97.8634	76.7683	64.7293	74.3878	53.1359	84.0307	90.0987	57.6283	69.7728	89.5165	53.1114	56.1658	87.5321	57.5289	75.7448	84.7086	62.0219	70.0906	63.627	101.706	48.6147	101.556	63.9835	54.4909	54.1806	49.8843	67.4498	61.9408	61.31	65.3006	68.4047	61.2588
Aco003109	0.770014	0.201501	0.568513	-0.367013	0.396078	0.016788	green	33.804	27.3319	22.397	31.4085	25.2533	22.1737	23.5915	26.0247	19.0113	24.8628	19.6443	19.6742	25.722	31.2696	21.9191	20.4603	44.3507	22.8632	24.2798	31.0302	24.4433	30.8593	34.3257	36.4913	43.9384	32.814	18.8795	23.3766	24.4339	21.8727	20.3012	18.1125	19.4986	18.7529	25.7437	27.2972
Aco016743	20.5166	18.6014	1.91519	16.6862	0.542168	0.000636367	green	0	0	0	2.31229	0	0	0	0	0	3.82108	0	0	2.20438	0	0	0	0	0	0	0	0	0	0	16.0055	0	2.9536	0	0	0	0	0	0	0	0	0	0
Aco001099	64.5254	33.9589	30.5665	3.39235	0.825084	6.03839e-10	green	43.6814	39.6935	35.2451	29.7511	31.4713	29.8133	16.8901	26.6192	13.618	25.4078	22.0759	11.6344	22.2732	28.3975	11.0878	16.1451	21.9967	14.9664	23.8128	34.2046	34.4207	10.8947	12.5045	35.4253	15.0394	24.9369	15.1063	12.3345	11.0562	12.8579	5.81465	5.24989	6.92197	13.0904	14.143	15.3628
Aco003915	68.5359	26.5055	42.0304	-15.525	0.707748	1.38324e-06	green	29.2669	25.9073	18.3096	18.4354	12.4065	10.5301	13.1325	8.14633	5.09163	26.1343	9.74074	3.65163	16.3401	10.0148	4.24683	11.4832	7.70198	3.25297	13.5469	11.3728	5.10032	8.08105	16.3951	14.2378	1.68999	8.25152	21.5004	6.59595	6.52963	4.15155	2.45126	2.14448	1.55773	7.08403	6.6338	5.492
Aco002345	12.0825	11.6501	0.432476	11.2176	0.458881	0.00487785	green	1.49855	2.23777	4.101	2.42775	2.06525	3.83903	1.75327	5.77468	1.10008	4.1524	9.61698	6.12425	2.81468	13.8104	4.7629	1.00906	15.814	11.8092	1.94256	7.93483	2.91712	0.096145	0.797676	48.5051	9.49477	23.5437	1.46759	3.22189	1.87962	4.51255	3.44455	2.57879	5.26999	1.24008	1.67485	1.17414
Aco003435	142.869	43.4196	99.4499	-56.0303	0.796646	6.18305e-09	green	469.88	453.521	495.002	397.811	463.051	496.268	227.119	392.509	244.802	348.652	480.485	377.533	305.906	460.34	277.43	177.907	377.543	275.246	156.796	201.766	273.438	104.12	141.228	584.166	293.92	432.778	137.115	258.611	167.923	268.945	285.002	176.624	230.384	183.71	209.35	252.733
Aco031432	140.964	92.7524	48.2114	44.541	0.8988	9.97162e-14	green	631.765	580.308	250.438	765.932	532.557	190.41	181.89	151.752	10.5093	521.389	408.6	44.3337	281.745	395.998	16.3538	43.4675	231.285	19.3701	13.5848	21.5316	10.8969	6.96063	22.4131	548.527	57.2972	156.468	35.1152	34.2503	3.20984	48.5829	67.2	3.50139	5.79267	7.79159	8.01586	15.4567
Aco008725	27.5368	15.9358	11.601	4.33487	0.743941	1.99538e-07	green	0.484113	1.69086	0.403278	1.32248	1.99293	0.282779	0	0.438322	0	1.06	0.272472	0.30295	0.324845	0.43814	0	0.296749	0.793116	0	0	0.202341	0.096452	0	0	0.925897	0	0.26006	0.226611	0.524809	0	0.220401	0	0	0	0.200235	0.355866	0.689576
Aco029538	96.0782	48.2319	47.8463	0.385635	0.853191	3.8638e-11	green	81.9211	83.845	68.3472	64.2913	66.6327	61.4433	40.7218	49.4978	34.1249	58.3346	42.4539	31.0169	47.7661	54.9432	30.0565	31.6343	39.312	35.4163	51.0341	60.8684	37.6118	50.798	39.4976	65.0567	37.3823	47.0147	38.0061	46.7932	30.8816	38.1787	35.2436	25.3398	28.0212	39.4179	41.5125	40.6751
Aco017166	0.329783	0.213409	0.116374	0.0970352	0.430972	0.00868828	green	0.640704	1.03149	0.302269	0.539864	0.407006	0.779271	0.391047	0.950805	0.061808	0.2553	0.987209	0.088285	1.5102	1.30007	0.754444	0.49014	0.822516	0.591562	1.00889	0.236863	0.620246	0.825117	0.318691	0.872707	0.147465	0.893232	0.408093	0.104035	0	0.453787	0.074878	0.513277	0.512402	0.300392	0.679554	0.068086
Aco016344	5.18513	2.45403	2.73111	-0.27708	0.536159	0.000750368	green	15.471	26.4083	17.4641	12.4019	17.8152	13.8958	12.5805	12.4676	9.44221	20.7866	20.8761	9.07572	20.6611	23.6371	11.1759	14.5535	15.1916	13.0096	22.2449	16.312	13.654	21.3248	16.2956	14.9671	9.07481	16.1878	14.2021	13.2621	7.6126	10.4415	13.1063	13.6299	14.5657	17.7543	12.2407	14.0667
Aco001715	2.73358	0.742252	1.99132	-1.24907	0.25911	0.127013	green	38.7112	44.3577	37.052	30.2712	45.8964	41.0152	38.4322	42.3485	35.7879	61.7441	51.1821	45.0201	63.7679	56.4332	53.108	53.4792	50.1845	68.6077	28.2811	35.3729	45.638	68.7819	33.4361	94.285	63.5331	74.3266	33.1491	63.3322	61.7002	75.2092	25.2045	31.0622	28.9922	64.2427	55.6062	66.2916
Aco011692	132.62	62.4028	70.2176	-7.81478	0.876055	2.612e-12	green	153.481	176.306	161.335	121.11	139.029	133.858	67.8286	81.3972	53.3539	111.537	98.3138	53.864	82.5544	116.623	60.9115	69.3191	102.404	71.4114	70.282	96.6619	96.7316	92.0868	62.792	146.859	66.1251	113.577	64.6858	49.4329	41.6117	66.9171	78.777	46.281	59.7418	70.2646	68.2407	67.3768
Aco022874	29.5356	13.9421	15.5936	-1.65151	0.694098	2.66858e-06	green	58.1366	63.1219	32.1807	52.3416	44.4008	26.524	28.9967	43.4448	34.9685	43.6612	46.6633	23.307	38.7168	53.4449	24.6167	37.8588	42.1358	30.1795	43.6511	44.9688	30.2347	26.6804	34.9232	66.9694	25.3027	48.9987	34.8272	30.1652	20.1746	20.6731	9.62746	12.6818	13.5468	79.0992	56.5722	52.7701
Aco012183	72.0236	28.6299	43.3937	-14.7638	0.730038	4.35231e-07	green	85.2588	89.5852	50.6605	90.533	87.2777	71.4761	63.6634	57.9113	37.4051	94.5051	58.1175	36.2391	58.4922	48.986	29.5808	24.0968	24.7516	19.7433	11.6647	31.4462	6.35986	11.9931	29.7716	41.8405	52.7525	20.1665	41.6004	18.1478	11.8143	22.5219	1.986	1.5073	1.25531	2.33233	7.27543	2.80126
Aco009770	81.4696	33.5081	47.9615	-14.4535	0.833183	2.88196e-10	green	340.712	427.545	286.676	436.936	371.128	296.558	217.94	271.738	231.734	382.696	417.666	241.769	307.199	372.95	217.758	227.92	309.931	201.048	179.025	107.831	193.212	114.574	106.262	412.999	313.168	374.819	141.9	221.183	226.379	273.368	114.798	78.2432	77.4698	238.655	298.613	260.02
Aco014755	42.5287	20.1107	22.418	-2.30738	0.695444	2.50503e-06	green	107.912	105.178	57.7746	79.6916	66.147	43.7854	50.6001	37.4974	23.0467	66.2352	37.4614	20.5535	40.8748	38.5246	12.2152	25.8218	35.9808	11.9949	38.6187	57.6025	28.0187	44.2576	54.2869	61.522	12.539	45.3209	54.9364	26.8058	14.5992	10.1594	16.4085	16.1318	15.4877	90.0791	71.236	66.4562
Aco000327	4.71485	2.03191	2.68294	-0.651023	0.509984	0.00148617	green	1.41538	0.951625	0.091685	0.673737	1.51849	0.50686	0.419795	0.493887	0	0.322274	0.593859	0.104764	0.384758	0.693576	0.119511	0.450694	1.17125	0.589784	0.336707	0.901034	1.0699	0.429949	0	0.363292	0	0.221807	0	0	0.133145	0	0.178623	0.127909	0.298371	0.731798	0.11789	0
Aco018675	52.8579	31.0454	21.8125	9.23284	0.785349	1.41084e-08	green	37.3325	37.232	36.7083	26.4964	29.8036	28.7141	25.4402	23.7405	17.6271	43.3583	25.4992	16.5154	36.4324	27.7702	18.5119	18.1838	18.4646	18.4127	28.7972	22.5667	13.9506	36.3973	28.5786	49.3097	19.7754	43.5998	30.7483	22.8484	16.8888	17.3277	15.0375	12.2421	14.1832	33.1681	27.9301	23.5361
Aco011821	58.8983	32.1782	26.7201	5.45807	0.780233	2.01744e-08	green	19.3405	21.5894	13.9977	22.1699	16.3568	11.1048	20.2207	11.0771	6.40282	33.4384	22.9383	6.60971	21.9311	20.4158	6.18021	14.2786	9.17623	5.14972	14.1799	5.31155	2.57243	20.912	18.787	35.2079	6.1577	12.747	11.5851	8.77093	8.45309	8.24826	3.35618	2.58538	3.46878	3.2933	6.77917	4.35384
Aco025914	86.6976	71.1109	15.5867	55.5242	0.919794	2.25944e-15	green	82.4518	82.8331	58.0875	70.7588	70.62	73.2169	49.2398	52.3711	21.674	128.157	65.0553	29.4111	74.1451	88.9347	23.7157	41.7144	66.5117	30.7813	20.9186	23.4429	28.6701	18.5281	33.8413	153.756	22.0563	88.8666	23.1445	17.4377	20.6697	25.4412	3.89919	2.4353	2.31743	21.1435	23.6703	16.7058
Aco008887	3.96667	0.890902	3.07577	-2.18486	0.257222	0.129904	green	18.6537	31.3714	10.3316	26.7033	61.213	11.337	5.56792	52.6866	8.74093	19.9968	123.057	2.7644	6.91943	71.8255	2.11901	3.88292	86.7166	8.54294	5.66097	59.1146	39.5653	1.00394	6.01602	14.2363	14.8665	5.09452	5.63099	4.18056	2.117	1.7967	59.4806	31.3329	24.3224	22.3319	15.0386	24.4099
Aco006524	92.5423	79.6976	12.8448	66.8528	0.927549	4.26186e-16	green	565.978	586.631	285.911	503.611	421.986	262.896	276.898	283.215	172.837	571.82	446.216	153.92	427.387	479.602	149.964	206.975	321.112	210.863	192.295	179.451	144.923	153.129	226.822	1050.67	204.312	346.443	233.054	150.141	98.4256	170.442	109.946	61.5437	71.3779	261.183	227.246	205.013
Aco021848	52.2578	25.1769	27.0809	-1.90404	0.748746	1.50636e-07	green	45.8915	58.5814	44.6577	35.898	33.3802	32.4656	17.9307	25.8443	13.4324	31.228	31.8502	11.859	23.1224	45.0007	13.8261	16.9354	47.0832	23.6991	13.8902	50.4726	33.8481	7.74953	13.3513	47.6602	10.4794	36.2601	16.7121	10.9201	10.0293	8.78901	12.1247	13.6988	15.5492	40.5659	31.0856	43.588
Aco017622	43.6607	26.1801	17.4805	8.6996	0.746	1.77025e-07	green	148.689	159.566	161.764	84.5141	119.847	121.279	19.7273	171.928	29.8782	60.9382	204.699	95.0947	15.3654	168.03	44.2333	7.53278	99.1427	29.1287	7.66153	5.80707	13.8802	3.50811	12.2324	370.778	24.9215	115.904	6.84385	30.8238	18.3378	54.7815	69.3945	29.4573	52.7758	11.3573	17.2214	14.452
Aco016042	8.85744	4.61182	4.24562	0.366204	0.59339	0.000136513	green	45.5853	42.1761	28.4309	32.8697	34.7486	26.1453	32.4926	31.1168	30.3079	39.8923	29.6442	29.0429	30.1044	30.709	32.548	29.9246	34.8802	29.9804	43.7438	35.9573	38.8505	32.1263	35.0155	41.7937	25.969	46.6925	32.774	33.4205	27.5019	23.7916	24.9775	25.4809	25.0783	32.2992	31.7433	34.7311
Aco016058	2.37898	0.44833	1.93065	-1.48232	0.454018	0.00541256	green	49.1098	42.0988	42.1718	51.1223	39.1817	30.5533	45.6498	41.701	25.2411	40.707	44.6233	24.6265	38.0295	43.531	31.7179	49.3945	56.2795	27.0019	38.1045	26.2926	26.2622	35.4798	39.9133	32.139	28.597	43.9621	42.5735	39.4029	19.7534	30.6929	35.497	28.104	41.1366	38.0953	25.1721	28.9387
Aco004909	12.2023	6.13619	6.06615	0.0700458	0.600323	0.000108608	green	45.4343	43.6477	46.2553	58.3804	56.9305	41.361	38.9357	30.5984	15.8615	58.025	39.9603	33.7114	49.665	45.137	19.0876	23.8218	40.5837	21.175	20.817	24.3565	19.2094	16.7605	18.7845	44.0807	41.6723	22.3624	24.202	61.7714	15.6927	36.2695	58.5747	13.6304	16.5098	20.2279	26.4724	28.0373
Aco031832	11.8728	7.67103	4.20176	3.46927	0.692996	2.80954e-06	green	26.5911	44.1444	26.1496	26.5698	30.4443	26.0432	18.5569	26.2757	23.6555	31.947	21.0522	19.8328	24.69	29.549	16.5804	10.0536	25.6597	27.2036	23.6303	17.2949	19.1713	23.7682	22.9985	31.8495	20.087	34.5457	20.9268	24.313	27.8969	18.9698	19.4583	14.3026	17.3735	30.9423	26.29	30.7113
Aco000455	2.07194	0.911303	1.16064	-0.249336	0.377949	0.0230445	green	37.5279	38.5527	37.669	30.2892	29.8972	27.1645	32.9209	25.7329	29.8503	41.7736	27.2825	33.8395	32.0782	31.6797	28.8241	25.7624	25.426	30.5764	34.9475	35.6208	32.2857	30.4824	36.9687	39.2372	25.7285	51.6811	38.7966	32.6381	23.4377	26.4166	33.1647	32.9284	35.7048	30.9107	31.1243	31.3376
Aco014426	33.6843	7.85354	25.8308	-17.9772	0.560622	0.00037612	green	2.65559	5.30775	6.45821	2.71987	5.29581	7.25777	1.09049	3.41894	3.01511	2.0097	5.86354	4.77372	2.88022	7.25539	3.57803	0.794624	5.58589	3.42862	0.351782	0.896799	1.4876	0.582949	0.4884	7.82629	5.54446	11.1189	0.446243	3.00578	1.90218	3.55018	1.48265	0.649131	1.77605	1.90546	2.32896	2.3081
Aco009863	29.7014	25.5666	4.13478	21.4318	0.74059	2.41876e-07	green	109.112	84.8839	92.6724	90.897	55.8324	80.4177	23.9227	65.1019	12.9554	102.588	109.385	39.3101	45.1642	145.402	34.1373	13.8601	149.972	90.2181	25.3998	97.7489	95.2025	2.45007	16.8046	367.761	42.9933	181.062	16.22	19.4683	16.282	50.5366	5.88751	6.27127	3.09814	18.3804	35.3389	22.2076
Aco005267	12.3586	10.5537	1.80488	8.74883	0.353261	0.0345632	green	3.52352	4.37791	3.65961	5.2618	4.33657	4.98688	6.15944	6.45727	4.21492	12.9359	21.3215	13.0973	19.3963	26.7979	12.4633	5.28808	27.7959	20.6887	1.04448	3.43607	18.445	1.36011	0.419723	124.857	43.8888	65.3054	0.979886	19.4723	28.7048	15.047	12.5075	4.82628	5.51449	29.9468	45.1191	23.3578
Aco016492	8.08538	1.92058	6.1648	-4.24422	0.47053	0.00377891	green	14.8902	16.3765	24.8089	13.8755	17.5826	24.4046	18.179	24.0466	17.0954	24.6158	14.4646	19.6933	26.121	23.9283	19.5453	14.2354	17.5904	20.4069	14.0194	19.8746	14.3563	8.11467	13.9105	18.5486	15.986	23.4837	18.8648	13.5299	10.8237	15.7193	7.73085	6.35929	9.3064	10.5716	12.2945	10.364
Aco008494	112.525	54.1844	58.341	-4.15659	0.834601	2.52165e-10	green	142.554	167.958	110.808	123.17	104.961	92.9818	54.3822	55.0953	41.7558	113.822	107.488	61.682	78.0912	93.4674	45.8709	25.0534	45.7707	38.8562	27.6193	24.9148	23.1076	30.6676	54.304	127.442	36.8883	87.5138	50.2468	59.9193	34.7213	37.0533	69.282	59.9945	67.8194	44.9955	32.3809	31.5742
Aco003202	69.8141	50.407	19.4071	31	0.872986	3.86246e-12	green	39.1225	33.4289	26.6832	33.0763	26.9622	22.8825	19.8151	20.8284	11.8608	24.8073	26.8754	12.6943	20.1209	32.1471	8.4903	18.7459	34.6251	15.8725	16.4519	15.4595	14.5863	13.4166	15.3792	40.5728	8.45925	24.2167	16.4682	14.6112	9.59009	11.1349	16.9493	15.5717	18.0752	19.8748	19.8669	20.0056
Aco025743	23.3978	12.8004	10.5973	2.20313	0.674372	6.49227e-06	green	13.4762	17.4925	10.1157	9.58236	7.26535	9.41624	1.05399	4.38849	0.172227	0.297408	3.35348	1.20347	1.38295	5.85607	0.369868	0	3.06164	2.87508	0.116844	1.44153	0.67966	0	2.33083	15.0444	0.250221	26.2095	4.27307	0	0.272177	1.87665	1.6964	2.29783	1.98027	4.47011	3.69093	8.21592
Aco010949	18.7625	5.5904	13.1721	-7.58168	0.619416	5.62482e-05	green	8.89909	9.60098	9.81533	6.56755	9.13292	8.00478	7.67699	7.70698	6.16531	8.17755	7.1926	5.70731	8.89595	7.78342	5.05314	6.61382	7.27873	5.77893	9.05197	5.25723	2.0548	10.1346	8.45003	11.5098	7.10164	8.41586	7.14052	6.87746	2.4037	5.67499	6.45082	5.14602	5.25781	5.02057	2.45199	2.92891
Aco002294	74.0927	41.4826	32.6101	8.87243	0.83173	3.30023e-10	green	54.4512	50.3549	46.6844	54.1128	50.0987	50.3589	45.4702	42.4233	25.0893	73.8027	45.0738	44.0569	50.7651	41.2016	33.2115	35.6983	33.1386	30.1972	39.7333	36.1037	30.6998	27.7908	30.1009	62.5385	33.6544	48.9138	35.8402	40.6071	29.9241	38.6317	15.5156	12.9069	15.0557	25.1123	24.1261	21.0178
Aco016251	35.1804	19.9243	15.2561	4.66821	0.754601	1.06036e-07	green	1.49442	1.20446	0.580736	1.63239	2.2657	0.613079	0	1.22502	0.70932	0.518831	1.77483	0.225967	0	0.6168	0	0	0.465039	0	0	0.724358	0	0.152896	0	2.19168	0	0	0	0.230401	0	0	0	0	0	0	0.598927	0.603869
Aco005397	53.8669	36.3946	17.4724	18.9222	0.805974	3.00679e-09	green	161.55	223.714	130.208	173.88	217.197	137.352	51.3814	137.128	66.0426	129.446	275.711	79.2833	88.8725	279.667	62.9226	31.9167	234.718	79.0797	42.5511	63.3425	75.1895	50.8103	29.6591	361.164	53.0336	271.265	40.4927	44.5073	69.1107	30.1526	19.5362	30.274	13.0529	161.728	133.797	215.947
Aco017805	22.4529	5.3476	17.1053	-11.7577	0.532926	0.000818915	green	10.759	9.97328	12.6632	9.55172	9.15065	9.29018	8.48043	6.51948	4.207	10.4154	8.77673	4.59665	8.07275	7.70551	2.96822	6.45839	4.89661	3.29622	8.28572	3.34649	1.8625	9.5449	8.58722	8.66012	9.66659	2.97177	9.33777	8.95202	6.68248	9.36832	2.97104	3.86912	3.9393	5.34587	6.01476	5.53691
Aco000505	99.3338	66.8178	32.5159	34.3019	0.897451	1.23547e-13	green	343.378	286.887	210.071	346.09	222.063	192.887	116.446	196.736	55.614	305.485	221.515	119.051	166.025	325.319	131.689	53.2258	257.08	146.408	14.4094	83.166	158.567	12.1795	25.9175	564.26	60.5837	274.325	37.3275	85.7102	9.13907	24.057	32.0903	3.65008	7.84817	9.37601	8.86637	14.3371
Aco015879	28.0944	23.6109	4.48351	19.1274	0.81096	2.01269e-09	green	2.89646	2.34569	2.33938	3.23275	4.34	1.57097	1.30162	1.50754	0.784779	5.92434	3.13072	2.25644	3.37966	2.63588	0.989008	0.808804	4.08912	1.11075	0.527919	0	1.89273	0.526068	0.799873	6.87624	0.21695	6.62219	0.75863	0.868407	0.344961	0.464696	0.196798	0	0	2.21665	1.16071	1.75449
Aco005523	3.75046	2.03017	1.72029	0.309875	0.180559	0.291967	green	1.46868	1.41637	0.458813	1.63057	1.21039	0.730192	0.402919	1.00389	0.486697	0.523045	3.19892	1.2116	0.77269	3.3681	1.79758	0.333426	3.69955	3.13579	0.106504	8.10737	1.99757	6.91883	0.236914	16.7575	10.0925	4.35701	0.439049	5.85536	5.50714	3.88707	1.09485	1.23754	1.03458	4.79281	9.30185	5.68263
Aco023767	4.71657	2.14893	2.56764	-0.418707	0.412034	0.0125252	green	0.06089	0.521243	0.870771	0.058123	0.527604	0.361983	0	0	0	0.187087	0.223875	0.658631	0	0	0.246381	0	0	0	0	0	0	0.2703	0	0.517685	0.147468	1.7692	0	0	0	0	0	0	0	0	0	0
Aco003258	125.555	67.4038	58.1512	9.25259	0.8775	2.16477e-12	green	156.588	173.964	162.488	148.461	126.097	146.808	29.7621	48.5918	22.585	85.805	114.267	76.4425	45.2773	133.439	41.6014	20.0394	86.4397	35.3004	14.6197	21.4655	28.3091	13.1538	14.8099	276.803	75.1147	155.859	15.2187	39.7845	13.8807	58.4602	23.3014	7.59861	14.9965	29.2159	26.3989	52.1256
Aco020406	54.8808	21.984	32.8968	-10.9128	0.742736	2.13906e-07	green	2021.11	1823.24	1519.45	2723.51	2748.84	1556.38	902.048	1038.93	242.349	2146.92	1751.51	767.706	1371.88	1931.26	530.319	521.287	2133.31	674.217	152.095	1060.46	1354.48	311.35	107.97	2274.33	1235.77	1658.97	195.535	1294.37	563.943	1180.73	1930.04	768.577	739.811	1236.52	1386.73	1638.56
Aco021446	5.13745	2.77736	2.36008	0.417278	0.500126	0.00189609	green	0.654937	0.962006	0.499081	0.924188	1.81941	0.470697	1.21512	0.75847	0.241095	1.29804	1.1052	0.255895	0.872689	0.903183	0.213631	0.606377	0.649391	0.292872	0.412962	0.640979	0	0.628682	0	0	0	0.185393	0.747982	0.604037	0	0	0.360441	0	0.480974	0.267147	0	0.292393
Aco004630	27.9784	6.51177	21.4667	-14.9549	0.60425	9.51862e-05	green	98.7509	100.994	87.2994	104.542	88.3535	76.1873	65.9271	72.3751	74.2076	111.119	72.9439	69.3241	82.6323	78.3789	67.8731	61.4908	62.8444	91.5673	81.1032	75.0915	81.2092	69.9795	66.0382	75.7344	55.6345	91.534	73.3667	71.252	53.5076	55.8373	31.3033	33.3547	34.5274	112.609	98.6168	107.452
Aco017971	31.132	24.3813	6.75065	17.6307	0.800975	4.44557e-09	green	64.6649	81.8408	52.2151	50.9138	67.3905	38.9946	53.2271	59.636	36.2657	72.44	69.5534	40.7008	65.875	73.5181	35.7848	51.2995	57.7753	40.545	59.1633	56.9333	37.0822	60.6219	53.1923	93.9466	35.9394	74.5188	49.6859	54.9458	29.1511	32.6479	46.1685	37.245	45.392	67.3485	54.0246	59.3988
Aco009965	24.5457	17.5216	7.02414	10.4974	0.754176	1.08807e-07	green	131.341	114.549	72.8174	126.803	127.361	72.4277	83.8828	138.506	67.1317	163.496	148.997	65.6455	103.993	134.781	68.3018	60.5178	126.29	87.5803	69.8112	87.2538	59.1227	48.3588	75.7225	149.623	99.2747	96.1947	80.2174	96.7204	72.9244	58.0769	112.627	29.0154	80.0101	69.9612	73.0198	82.3579
Aco025968	31.2592	26.5327	4.72649	21.8063	0.785271	1.41864e-08	green	30.8597	29.9372	0	37.6022	32.7453	10.1	0	18.059	9.03405	81.4539	30.179	4.23214	20.5858	16.9447	0	0	8.90968	0	0	8.55733	0	25.1103	0	52.6583	5.08371	16.3782	0	0	0	0	0	0	0	0	0	11.1931
Aco009318	81.7298	46.2481	35.4816	10.7665	0.854788	3.24975e-11	green	38.4057	33.6656	39.6919	28.3241	29.2423	31.389	19.7581	23.9311	19.5342	34.2561	23.4878	23.1793	24.8904	28.388	20.6921	16.985	21.6489	19.0883	16.0301	21.1539	20.003	28.1463	22.4935	47.8788	25.2431	41.0466	25.2664	21.9166	13.9805	17.0212	13.4825	8.06013	9.95757	17.6524	17.2258	18.2441
Aco008286	0.114644	0.0844465	0.0301975	0.054249	0.359272	0.0313986	green	0	1.83116	1.65491	0	1.26649	0.827617	0	0	0	0.407811	0.687163	0.305905	0	0.355265	0	0	0.470507	1.50239	0	0.272384	0.808636	0.519127	1.38252	2.53553	0	0	1.10404	0	0.898288	1.05369	0	0	0.666201	1.74518	0	0
Aco009096	11.679	3.97715	7.70181	-3.72466	0.282504	0.0950372	green	4.05136	1.12673	1.07146	5.23766	3.27059	0.729773	13.4527	1.404	0.605035	9.63875	6.34031	1.53957	12.8106	6.45896	2.19292	13.3649	7.09046	1.98618	9.85589	4.96971	5.13211	1.93397	4.49369	30.0602	9.73195	5.66693	3.49681	6.07543	5.19338	3.83835	2.68743	2.41709	2.61631	17.1531	17.4964	13.9995
Aco023687	8.80535	7.70333	1.10203	6.6013	0.442775	0.00684546	green	4.83681	2.41099	4.94932	4.17123	2.16565	6.01229	1.45952	9.68081	3.05392	5.35353	15.5464	7.44195	3.10867	18.1221	6.33445	0.218723	21.2083	29.8801	0.123487	8.80789	12.8882	0.297057	0.659871	62.3131	0.96321	69.0683	0.126474	0	0.072281	0	0.259418	0.561983	0.285097	7.87397	4.05349	3.7742
Aco012502	22.1332	1.33094	20.8023	-19.4713	0.544829	0.000590987	green	25.6517	39.1858	34.8073	26.5239	32.6147	36.9236	32.5229	36.8851	28.0696	30.5791	37.1447	21.7887	33.904	39.0764	25.4427	36.3038	36.8202	28.9937	37.992	33.2709	24.1943	25.394	29.1976	41.2833	21.0636	35.3015	25.5165	25.9036	38.8332	35.2552	14.7829	12.8102	12.3673	22.7742	31.4624	34.9967
Aco004658	92.8283	39.5548	53.2734	-13.7186	0.825522	5.80733e-10	green	73.9826	91.9352	77.0065	64.1913	63.9335	63.7237	36.0305	58.0444	42.205	64.3673	70.7293	51.8704	50.4722	79.6001	41.5762	27.8957	58.1136	51.7457	29.9766	46.1615	50.2028	22.361	24.4678	78.686	29.9141	75.9284	31.7008	49.4146	32.8301	43.9808	30.8867	25.7631	26.4109	71.7796	54.7098	67.2646
Aco012100	5.13086	0.78373	4.34713	-3.5634	0.495297	0.00213083	green	46.9901	62.093	45.7177	42.5819	30.3103	31.3209	39.5281	31.6739	24.5889	25.3772	20.0193	21.15	30.3963	40.8273	23.4881	47.1586	55.8619	24.5931	46.9464	39.5152	23.1298	17.324	34.7483	55.22	42.3786	23.6147	32.6222	36.0205	37.9116	43.8184	11.2092	9.64044	13.6695	44.3334	41.1335	36.5577
Aco003243	0.751867	0.124048	0.627819	-0.503771	0.372316	0.025343	green	0.518318	0.796026	0	0	0.443444	0.665132	0.110759	0.762343	0	0.105171	1.05921	1.32544	0	0.156039	0	0.40897	0	0	0.068775	0	0	0	0	0.565452	0	0.042553	0	0.112069	0	0.398038	0	0	0	0	0.100294	0
Aco002964	11.8962	5.77992	6.1163	-0.33638	0.622518	5.03385e-05	green	35.5943	38.2232	25.1333	30.7539	28.3139	20.5692	28.3672	25.3625	17.4352	38.4397	38.3222	20.7172	36.8219	41.1308	19.6786	24.293	32.3477	24.9737	38.6128	39.8809	34.6114	49.4899	24.7473	42.3626	16.1284	38.8671	20.3307	22.0301	20.2411	16.056	26.616	17.6945	16.9376	26.4738	25.5872	22.2367
Aco013434	122.542	75.3713	47.1707	28.2005	0.903481	4.62555e-14	green	72.6817	88.7089	95.6402	83.128	112.766	95.3373	36.8998	61.3575	22.8482	104.168	94.4191	49.7957	62.9905	97.5884	25.6419	21.2586	50.8308	24.5063	27.0887	30.9626	23.7995	22.4307	19.7515	115.832	29.0696	73.0687	38.0039	30.893	17.5741	21.046	21.0103	13.3492	10.8304	16.6122	18.7479	17.3628
Aco015158	13.8925	8.41997	5.47249	2.94748	0.577322	0.000227417	green	48.1762	38.0943	11.7797	20.4816	13.286	6.45718	2.05043	10.5817	1.16518	15.7475	22.6564	4.18886	7.53916	19.9206	1.85285	0.567798	15.0186	1.69681	0	0.978513	1.33547	0	3.98101	85.4229	1.95971	46.4146	0.560669	14.9693	16.045	19.1598	10.1986	9.85127	9.98551	57.1477	57.7548	27.7473
Aco000525	74.0725	51.2506	22.8219	28.4287	0.853169	3.87294e-11	green	507.822	360.311	384.209	470.763	223.398	284.664	323.295	178.142	121.811	616.118	230.785	209.773	362.984	293.741	169.69	192.047	178.857	134.67	169.186	102.113	125.425	290.11	225.849	759.607	105.76	364.937	265.887	174.749	54.7959	77.7409	28.5789	20.5016	25.1774	137.219	126.474	139.564
Aco003007	12.0791	8.20617	3.87292	4.33324	0.697123	2.31403e-06	green	57.823	58.7252	47.2053	64.3686	54.8563	52.1804	48.7545	44.015	28.4533	72.9712	41.2609	36.3151	54.1789	47.272	35.8045	53.9468	47.5564	35.5201	36.5065	38.0051	54.1176	30.0604	31.3441	46.3287	22.8568	50.6155	32.4364	47.698	37.8327	27.1954	30.0078	36.2291	33.9687	50.6965	48.1213	45.851
Aco009311	24.283	5.90275	18.3803	-12.4775	0.605041	9.26702e-05	green	42.6415	42.4417	30.5728	39.4477	37.474	27.5394	35.6434	30.0021	21.3693	43.9482	35.001	21.8522	44.7752	42.4538	22.8213	31.0211	34.5892	29.0827	36.5299	41.4486	36.8936	35.6143	37.2119	53.9852	33.0318	38.3095	36.8081	43.0715	34.7423	33.3299	18.9402	20.1315	18.1699	48.2949	42.4319	52.5667
Aco012345	10.5464	1.44108	9.10533	-7.66425	0.379879	0.022298	green	85.9323	63.4435	76.9763	123.355	78.5719	102.307	76.6162	63.1892	32.4607	97.7774	83.6559	45.0927	68.316	80.4016	51.3254	44.9391	77.4746	49.3691	27.0293	17.5537	25.7151	41.8552	18.1871	71.5575	103.508	57.8398	21.9879	115.852	111.051	117.849	51.6625	39.6063	37.4118	46.0401	72.4359	64.7324
Aco017175	5.55195	2.28371	3.26825	-0.984539	0.419092	0.0109546	green	38.0386	44.0972	34.0762	25.3696	31.8516	30.798	24.2024	31.4058	35.5777	38.5383	41.2038	28.9129	36.6741	40.8924	31.8909	26.0948	33.6759	48.5995	42.6649	48.7888	32.4391	37.6481	33.6753	39.7011	21.0396	66.4456	30.9483	21.6612	29.3663	21.5154	20.3591	24.2866	22.591	45.182	37.9033	35.1922
Aco019822	14.0321	8.52874	5.50333	3.02541	0.579855	0.000210209	green	41.1512	75.1311	53.567	30.9938	51.3297	41.3724	21.2345	32.9724	39.337	40.7424	52.3714	48.8098	37.8341	58.5367	50.315	22.1233	44.0948	72.1605	23.7928	19.2673	31.6751	16.57	22.3226	74.5039	12.1484	119.624	19.6948	29.0081	18.5721	16.1553	20.1881	23.2696	29.0326	25.5332	23.86	24.9436
Aco029503	57.7661	34.3202	23.4459	10.8743	0.815615	1.36895e-09	green	36.7178	38.8042	17.6324	24.5761	23.6226	15.4827	25.7476	18.3283	1.87116	21.939	18.1706	1.7339	24.3771	26.6738	2.18547	18.5133	15.3887	2.76754	16.0783	3.94787	4.05703	8.47697	12.854	24.6865	7.9238	7.00258	9.73118	5.10327	2.0761	4.57312	5.79429	3.3834	2.46901	11.5115	12.8665	12.013
Aco014050	26.8577	8.83045	18.0272	-9.19678	0.648017	1.92869e-05	green	308.102	306.659	355.076	431.746	349.415	452.139	275.243	275.193	174.945	513.139	530.296	454.257	379.184	449.6	328.163	243.22	391.018	335.861	170.31	229.7	343.766	135.053	145.36	538.066	416.05	505.148	148.938	272.576	140.482	277.595	323.864	133.782	169.69	190.092	210.999	246.915
Aco007210	66.5522	27.6459	38.9063	-11.2603	0.790423	9.80039e-09	green	67.2845	81.4138	80.1221	57.4365	69.3172	74.6564	37.7498	52.2567	35.6181	70.8526	68.4672	51.3897	58.234	78.9728	44.8766	30.4108	50.4782	42.4735	34.1665	40.5281	66.7745	42.1254	27.8381	77.3834	42.0455	65.7538	35.2775	50.1643	43.1534	51.38	48.3821	44.4952	45.331	50.7207	50.2334	53.0724
Aco016213	4.55792	1.94595	2.61197	-0.666018	0.187292	0.27404	green	1.15743	1.33641	1.88917	1.31992	2.41917	3.22226	1.23763	10.7701	1.89733	2.37558	6.08209	1.63964	2.32678	10.8225	1.2512	0.141369	27.1743	5.72205	1.1359	6.14241	2.90714	0.207989	0.682179	2.55831	3.70664	6.76589	0	0.248146	0	0.482294	1.11548	1.39889	1.51073	2.1475	1.14661	1.60137
Aco022505	0.387647	0.00678102	0.380866	-0.374085	0.200773	0.240344	green	36.7746	29.8795	32.6675	36.6585	33.878	26.6474	30.421	43.5209	33.529	30.0855	26.7702	18.5449	36.4968	27.7953	22.7111	55.34	26.2242	27.1113	13.6751	34.855	14.4261	5.42497	24.363	31.0488	57.5066	39.2119	15.3709	41.5991	16.8746	19.2141	26.6614	20.4799	31.842	36.8958	36.3828	38.9602
Aco015172	19.591	5.98758	13.6034	-7.61584	0.550192	0.000508188	green	77.5738	97.9114	55.0062	37.6567	41.4507	47.9404	4.53562	48.7527	60.2524	16.3727	51.085	5.77508	10.4553	45.346	5.1461	0.951267	23.3142	6.26668	5.72634	6.05251	5.91612	23.4973	3.87491	92.1472	13.074	27.9442	2.06239	15.253	8.73256	11.2107	20.9031	38.2129	26.2012	96.3821	70.2203	65.2063
Aco018084	17.1243	10.3858	6.73851	3.6473	0.655636	1.42314e-05	green	208.96	370.368	57.1958	220.731	296.531	49.5243	41.8895	136.041	12.9205	420.737	382.776	26.1458	129.747	479.269	63.753	29.6078	620.042	198.819	9.66058	379.585	543.334	2.21001	5.19107	575.592	13.1399	352.444	1.73876	38.0679	33.6478	17.3691	8.77145	49.8721	24.6108	163.012	111.273	188.336
Aco014434	6.90805	3.37623	3.53183	-0.155602	0.533888	0.000797966	green	3.66764	2.84982	1.34728	5.46352	1.56959	0.440297	1.36126	0.42026	0	6.39858	0.138642	0.563402	1.99764	1.04487	0	1.02083	0.386075	0.136693	0.334226	0.414211	0	0	1.24176	0.675376	0.593528	0.523618	1.0105	0	0	0.545601	0	0	0	1.26169	4.5054	1.68456
Aco004902	23.494	10.9771	12.5168	-1.53971	0.736611	3.02842e-07	green	55.9283	70.5822	53.405	38.532	63.7936	49.6319	30.0033	42.9133	31.1457	44.8394	51.8898	33.4436	35.9566	47.3875	27.9737	25.154	45.4389	31.9411	30.4748	46.7384	38.1745	37.7083	25.7795	58.5068	36.6203	60.7183	31.6724	70.878	32.2542	33.2854	33.1161	28.7352	33.8793	41.2342	37.1149	40.8483
Aco008074	12.2696	8.93289	3.3367	5.59619	0.660142	1.18418e-05	green	6.6399	13.4067	7.8009	5.65312	8.49539	4.83373	6.1903	8.00578	5.33768	10.1352	10.8167	6.05693	7.70907	10.4993	3.80753	8.93147	9.44847	4.81871	7.3117	10.775	10.114	6.18192	4.50651	13.4082	3.62133	9.87877	5.60717	4.89611	5.7668	5.49354	4.6488	5.0172	5.50996	9.92385	8.71499	9.72749
Aco019061	44.9586	16.5306	28.428	-11.8973	0.667128	8.85141e-06	green	104.345	110.415	54.109	74.5679	103.456	45.4404	57.7632	63.424	13.2944	86.4656	29.5989	8.54955	43.8929	31.1739	10.2285	36.4356	22.0291	6.89308	72.9618	11.2026	2.14421	34.1213	70.6221	80.0388	17.0645	5.68918	64.4866	69.0769	36.4136	41.2585	1.91426	2.16657	1.98778	5.01632	6.57656	3.08215
Aco009107	29.7677	10.1052	19.6624	-9.55718	0.648405	1.89947e-05	green	45.9244	93.8105	31.35	94.4625	91.3846	34.0028	38.296	50.2979	15.3458	80.4757	81.1874	33.3792	43.4235	69.2068	30.4074	24.898	69.3362	26.8065	19.7372	19.9856	24.747	13.4713	12.444	38.616	66.6262	31.2599	11.4708	53.5004	35.4241	74.3873	2.44128	0.568133	0.71939	37.8524	28.409	45.8542
Aco015184	53.9243	41.9963	11.928	30.0683	0.817213	1.19625e-09	green	155.953	205.625	75.2658	199.755	161.332	49.8949	28.6476	77.3467	7.77641	143.911	338.645	23.4715	109.704	288.518	7.07623	13.4991	184.177	11.5629	1.15788	15.5224	14.4748	0.126783	2.1745	234.887	1.86909	67.575	2.79235	3.67722	0.520621	0.418997	12.6048	2.14899	5.1601	24.9358	11.1805	22.8603
Aco007217	29.4261	10.9641	18.462	-7.49785	0.651644	1.67061e-05	green	21.0015	18.6407	21.6077	16.1321	15.7694	17.9776	14.1636	21.4002	10.5749	21.3081	11.4105	12.6048	19.42	11.3879	8.10127	10.154	6.83606	4.37504	4.98972	2.53425	2.27506	1.64893	15.677	14.6586	7.98943	5.81259	14.3913	10.6911	2.03076	3.51062	6.01221	2.85448	3.61812	6.07596	7.64847	5.64683
Aco018074	33.2188	31.549	1.66977	29.8792	0.787624	1.19967e-08	green	102.849	124.624	67.8792	65.2336	78.629	50.1069	51.7977	74.7241	50.3723	175.193	135.505	40.1765	95.0196	133.488	38.6331	48.3424	73.3365	58.3078	55.2126	95.2738	73.5888	41.3365	63.1423	283.958	36.933	125.31	47.5893	56.2241	51.4383	36.7546	50.7483	47.166	56.9264	58.1217	45.1609	54.0804
Aco011550	116.899	62.6807	54.2185	8.46223	0.874519	3.18082e-12	green	115.863	130.095	119.254	77.3412	89.8061	97.491	50.877	71.1437	46.5246	97.8968	63.3017	41.3057	60.3846	78.6311	40.3634	38.3982	48.3921	43.0204	48.3056	30.291	37.5841	39.063	59.3623	101.391	42.1081	106.758	60.9756	46.7158	38.7172	44.6192	26.9765	30.6177	31.0417	54.7302	41.8637	45.4818
Aco007922	9.93677	4.88925	5.04752	-0.158272	0.587254	0.000166413	green	119.303	124.74	133.497	90.0185	97.1032	133.252	87.4787	96.975	92.4457	123.164	102.007	89.0882	123.351	118.644	85.4802	82.0676	107.32	102.569	123.026	104.163	127.557	109.298	107.728	144.35	78.2143	146.688	107.197	99.3106	122.344	103.95	71.5538	70.1896	70.9144	122.462	116.068	120.08
Aco014332	28.745	13.0141	15.7309	-2.71684	0.770676	3.83915e-08	green	5.70377	7.5478	3.29407	5.97655	6.39678	4.54399	2.01952	5.46434	1.08354	6.63409	4.31474	1.43248	3.58143	3.59786	2.20688	1.47572	3.96828	3.54331	0.807242	2.49073	1.2355	2.61474	1.47665	7.5492	4.27679	9.6999	2.21875	3.95624	3.35976	5.21793	0.254946	0.452775	0.065334	4.46168	2.88056	6.06155
Aco003233	33.14	22.1721	10.9679	11.2042	0.801926	4.13058e-09	green	85.9628	84.5126	80.3824	56.7882	60.0347	67.3678	53.7408	71.3763	47.7933	71.7977	58.1459	44.6282	61.8366	76.7345	38.0412	59.1123	66.5956	51.1882	51.9205	78.6958	63.0032	36.5892	59.1365	84.4295	41.1417	69.7158	54.0323	51.8814	40.7544	51.4291	45.1496	37.5712	47.3123	63.7081	54.6502	62.8336
Aco003062	10.5047	4.69186	5.81284	-1.12098	0.314186	0.0620197	green	14.7767	14.8954	7.80566	15.9319	10.9451	8.17149	22.1325	15.8337	9.22921	21.0641	13.0705	3.90294	31.5269	14.2815	7.24114	31.5282	18.5402	6.47504	37.5637	10.0909	6.64906	30.5785	22.7387	110.711	42.6829	22.7154	15.2447	22.6926	16.6353	16.2739	1.28257	3.24124	2.22799	62.5235	64.486	35.3148
Aco000671	33.6114	3.1995	30.4119	-27.2124	0.517312	0.00123409	green	17.8556	17.6933	22.0791	18.1035	17.2	22.7264	19.1	22.8169	15.353	19.1591	21.1984	19.1807	17.2806	23.075	19.8007	16.7366	21.9483	16.2083	13.0613	10.2402	12.2967	16.9062	15.1374	23.5915	21.113	17.5312	16.9408	15.8536	11.9297	19.7817	11.0657	7.74825	12.8047	7.93894	7.76418	9.25249
Aco007530	9.53457	3.78985	5.74472	-1.95487	0.506825	0.00160807	green	19.4459	21.4746	12.878	14.5301	22.4654	12.0755	11.9927	18.7582	2.83047	20.3166	20.0258	2.79969	16.0097	20.0938	1.60064	14.505	12.448	2.71004	11.7166	6.11022	4.92293	3.14737	15.5051	21.0573	14.9563	6.51664	10.2307	44.0709	14.7628	22.0593	1.59477	1.25326	1.67542	3.35082	5.59508	4.80055
Aco018511	89.7526	39.9535	49.799	-9.84548	0.813551	1.62621e-09	green	29.5542	33.1906	30.2678	26.8078	38.0944	33.2834	11.2421	19.2155	14.4668	36.719	17.6244	23.1221	15.2376	19.1839	17.1973	3.26426	12.3607	10.697	13.9273	5.41813	1.83878	2.64044	6.43428	31.6713	7.78374	30.0515	4.19445	3.32797	1.32138	2.68384	2.15638	1.15911	1.27433	0.224653	0.063663	0.035278
Aco014365	73.8688	44.074	29.7949	14.2791	0.848782	6.16569e-11	green	100.28	104.294	87.5708	100.806	98.5863	68.0587	66.3257	63.0838	53.4624	88.6806	77.0711	58.5766	68.3212	77.3758	51.6142	53.7659	67.9472	49.807	56.0521	83.9889	51.9344	65.5372	64.4434	104.379	47.8441	80.4655	65.2524	62.0691	48.6154	50.4437	84.0824	60.8257	57.0596	61.5138	57.5152	59.6051
Aco008318	13.9088	8.38747	5.52128	2.86619	0.662031	1.09536e-05	green	0.775877	1.44178	1.42798	0.599084	0.550472	0.635986	0.060432	0.687253	0.135326	0.784148	0.612187	0.157794	0.574794	0.538477	0	0.113258	0.360637	0.10517	0.15206	0	0.130308	2.31167	0.387772	2.8652	0.247082	1.20046	0.16054	0.049333	0.343556	0.197649	0	0.05477	0.039278	0.370415	0.239102	0
Aco017736	67.2282	35.9966	31.2315	4.76508	0.821912	7.98541e-10	green	99.3395	97.4556	99.4368	94.2834	86.262	101.124	67.8643	58.9949	49.8112	81.8422	65.2068	62.2458	66.5482	75.6997	54.8987	54.7846	77.3364	60.27	62.8796	54.3071	66.8068	73.9982	66.4028	111.807	65.9799	102.659	68.3588	53.7352	48.8312	75.9987	70.5681	44.7489	49.4699	60.5657	61.087	65.7622
Aco001492	55.1629	17.9575	37.2055	-19.248	0.710707	1.19371e-06	green	58.9018	51.3176	66.1577	46.2149	43.2909	52.544	32.5264	35.0771	27.8162	49.7037	34.5226	53.3826	39.4346	49.9864	39.0009	20.6679	39.0304	39.1994	25.6884	25.101	49.0504	16.6344	26.0345	46.3014	30.8175	56.658	31.7483	19.8312	12.6784	26.6894	24.3498	12.7515	14.7407	24.4083	23.7762	30.8398
Aco011549	74.7743	46.4792	28.2951	18.184	0.827361	4.92354e-10	green	417.7	468.031	240.493	391.279	339.14	126.76	254.645	176.847	39.8162	616.151	305.374	53.6119	286.632	219.994	30.4022	106.68	108.492	23.7214	122.994	85.481	27.3012	267.642	243.396	429.09	61.1913	196.068	265.575	179.856	39.4494	42.8064	34.3161	21.4725	18.9573	340.791	169.607	151.952
Aco026896	144.433	66.0925	78.3402	-12.2477	0.866705	8.34356e-12	green	398.774	345.803	346.915	385.705	298.999	317.84	187.924	165.956	114.606	265.206	234.188	196.471	209.544	231.47	155.339	145.069	215.125	140.238	184.914	132.117	206.095	133.027	144.515	353.803	180.333	247.855	117.243	143.802	79.5644	183.264	174.124	80.0458	95.7663	126.809	125.249	121.92
Aco023684	126.089	84.6544	41.4342	43.2202	0.89771	1.186e-13	green	1583.98	1689.1	627.328	1985.58	2022.07	631.348	534.782	735.745	62.1419	1381.68	1647.22	296.342	860.33	1374.11	112.599	247.623	1192.6	164.868	88.6329	425.781	200.504	44.1485	83.7564	1586.79	233.563	793.677	185.077	304.342	8.81904	203.087	423.73	10.3261	12.1918	280.043	122.509	170.566
Aco007912	40.0258	32.7678	7.25803	25.5097	0.819557	9.79265e-10	green	188.426	157.496	67.5739	103.863	68.9838	48.1412	16.7364	38.2053	6.15456	63.647	88.2413	8.44664	40.7983	135.803	11.737	3.32127	73.6237	32.8988	4.5414	42.747	52.1117	147.921	18.0103	310.045	4.33868	135.738	5.58043	5.56972	0.371538	5.13012	7.13756	2.21844	5.08023	46.6211	32.5033	48.9394
Aco018898	43.2806	10.0184	33.2621	-23.2437	0.598201	0.000116545	green	13.4858	35.9879	16.833	17.1652	28.522	16.6802	4.00064	18.7305	9.8677	12.9154	26.8103	7.48696	6.52437	29.4196	6.74714	2.1245	22.7685	7.28488	1.99876	14.4509	16.7553	1.53139	0.999979	14.8998	13.0717	20.3354	2.41023	11.7048	8.71457	11.8578	2.31882	3.30626	4.3675	26.5811	26.6259	23.6925
Aco013143	96.7168	38.8843	57.8325	-18.9482	0.801079	4.41009e-09	green	279.537	353.069	198.988	294.195	295.073	208.647	54.8895	142.076	87.3571	157.734	310.376	78.4697	108.324	321.438	82.2195	40.1617	258.842	126.95	29.974	278.941	181.821	26.2895	36.0952	241.433	65.708	213.546	37.9963	41.5699	41.8953	51.2339	62.0432	60.6187	50.9778	126.715	96.9696	96.5642
Aco004991	31.9484	4.68965	27.2588	-22.5691	0.52501	0.00101064	green	350.102	428.847	544.267	272.514	474.466	585.159	110.43	597.381	239.965	244.006	504.05	167.965	178.275	628.735	197.86	53.9231	606.411	329.093	116.224	533.579	675.378	17.1934	31.3352	412.116	292.334	228.397	38.8511	146.208	78.7632	210.559	93.0494	74.5924	53.2854	108.447	140.618	203.888
Aco011117	34.8032	20.367	14.4362	5.93076	0.75423	1.0845e-07	green	18.4051	32.8058	24.9089	18.0327	20.2108	17.3049	10.3598	22.2365	11.1453	18.2301	31.7831	16.059	15.4653	31.3828	12.3369	11.8274	23.8619	14.9501	11.665	22.3567	18.4605	9.28204	12.8084	30.6536	8.54337	30.3832	12.8845	10.1894	7.05846	5.32617	6.49879	5.00426	7.47315	31.4394	15.9645	14.2915
Aco024431	1.34292	0.793412	0.549509	0.243903	0.521293	0.00111364	green	0.949694	1.23286	1.01076	2.91913	1.05478	0.814864	0.747658	0.72814	0	3.23854	0.944113	0.952108	0.826891	0.608131	1.08797	0.702726	0.078072	0.754509	0.985802	1.86081	0.858165	1.07214	0.468486	2.78157	1.83315	0.884061	0.025044	1.06487	0.095312	1.31224	0.852004	0.093194	0.231712	1.39666	1.1966	1.99818
Aco013315	12.192	5.20722	6.98481	-1.77759	0.600027	0.000109682	green	12.0425	19.1133	4.41755	14.8495	18.6562	5.79898	11.8888	10.5773	4.27518	22.2066	26.6882	5.57284	18.386	16.1946	4.1218	16.9295	9.32616	4.32161	22.4891	3.17809	3.55461	9.29938	12.2839	18.4972	19.0437	5.87082	7.36143	5.2992	4.78659	5.22469	2.78787	2.27834	1.81302	5.91436	7.10543	5.5522
Aco003969	2.32659	1.41819	0.908405	0.509784	0.321283	0.0560476	green	2.59323	1.02777	1.60922	0.732474	1.0918	0.655502	1.11069	0.865931	1.92395	0.845065	1.05086	0.670573	1.63374	0.648801	0.721209	1.19481	0.21091	0.097002	1.06307	0.687979	0.267763	1.0696	1.25787	4.87002	3.19703	1.18363	1.20692	1.52467	1.93614	1.08432	0.32479	0.671461	0.473678	2.41604	1.27981	2.72318
Aco001457	162.937	119.31	43.6273	75.6826	0.970064	1.76592e-22	green	3039.86	2717.58	1509.79	2525.26	2079.65	1183.05	1025.22	1019.1	315.133	2700.3	1767.58	523.564	1327.42	1773.04	320.424	414.731	1011.67	387.469	333.53	679.099	379.294	514.522	645.097	3152.11	242.925	2130.03	755.507	714.798	202.617	212.956	273.164	113.025	69.7798	725.493	450.488	499.783
Aco005053	8.92762	4.27097	4.65665	-0.385676	0.616993	6.12912e-05	green	34.8921	71.3846	46.63	43.1646	82.3754	33.8955	46.6752	73.5405	29.2713	49.1329	63.712	32.8866	49.2779	83.3817	33.3085	40.1302	78.7449	28.9526	43.7893	81.3383	28.7695	47.6789	48.9861	89.1778	52.4121	38.0111	49.3158	44.2339	26.5205	16.0073	35.4605	20.4238	25.6943	27.7278	22.0671	23.1487
Aco000232	39.3701	19.217	20.1531	-0.936025	0.67408	6.57483e-06	green	573.457	375.48	24.0953	795.567	397.002	22.9252	438.901	203.596	14.7278	1156.13	319.961	29.7007	580.736	212.618	12.8095	192.952	101.894	10.8036	71.4001	351.763	3.0022	41.0696	238.221	565.738	12.1142	8.59991	322.44	212.609	5.75717	5.00685	1.32487	1.53333	0.417009	15.4647	16.1047	16.2367
Aco001945	6.00439	2.65563	3.34876	-0.693136	0.59423	0.000132818	green	5.03814	9.72329	3.13451	12.5139	8.64658	6.13675	7.11714	7.28679	4.75516	14.2006	8.8432	5.0687	7.19377	4.54528	5.38114	9.01833	9.90094	8.94087	7.10839	7.70041	7.98864	3.77818	3.63129	7.96048	4.21012	9.39553	4.46434	7.75204	1.78242	1.67078	2.80514	1.88135	1.5331	4.01598	2.43807	3.28262
Aco006441	62.5784	28.0722	34.5062	-6.43403	0.808062	2.54525e-09	green	44.2275	51.3664	43.3964	36.0794	44.7511	39.0553	18.4488	24.5869	19.6557	39.0829	34.8492	36.1308	34.172	37.4943	25.8447	18.2212	24.3717	25.1479	14.5899	27.7584	22.0215	29.3808	18.0911	48.8213	26.0548	50.9845	23.2272	21.0796	11.2057	21.4243	32.9578	13.3984	17.199	37.803	34.8928	33.8624
Aco011275	68.7382	35.5229	33.2152	2.30773	0.827032	5.07194e-10	green	40.4754	59.283	48.5438	35.2915	41.9457	37.393	16.8524	26.1026	21.9551	38.0206	31.113	16.2356	26.5373	33.0746	18.5817	12.0901	20.0377	19.821	22.902	19.4736	15.3491	15.5937	13.1471	52.5764	25.5035	39.2469	20.3315	21.1069	22.3333	22.0901	15.9538	22.0695	28.6171	28.3555	34.2933	22.8856
Aco009511	13.1305	3.43147	9.69908	-6.26761	0.56327	0.000347902	green	508.214	449.95	401.798	621.475	549.026	465.652	473.499	497.661	395.737	769.24	553.488	545.433	651.156	569.096	537.04	383.246	597.842	561.706	292.671	339.132	554.392	197.203	198.642	705.474	575.692	509.323	202.539	443.438	381.732	541.546	285.066	276.633	426.878	353.831	369.549	363.577
Aco004468	49.9717	37.6404	12.3313	25.3091	0.82618	5.47558e-10	green	48.0757	59.1467	35.1279	38.4926	40.7634	22.9829	27.5088	31.3572	20.91	48.1909	39.1992	21.0462	33.0651	41.336	20.1113	24.2062	32.4225	22.9345	32.953	38.7599	25.2269	37.9106	27.7226	50.2273	14.684	46.2062	31.5251	26.9394	26.1182	17.3474	22.3473	23.1103	22.3923	41.9706	35.5811	40.7664
Aco010591	2.48352	2.03755	0.445972	1.59158	0.197331	0.248669	green	0.233231	0.482166	0.06176	0	0.144818	0.405998	0	0.58144	0.261919	0	0.509869	0.579044	0.170713	0.364373	0.530872	0.704797	0.482382	0.168342	0.351504	0	0.560942	1.03863	0.713295	2.78956	0.254551	0.355424	0.367207	0.745057	0.587759	0.857109	0.378745	0.117208	0.122305	0.569869	0.825322	1.21086
Aco008311	45.9996	42.1588	3.8408	38.318	0.809566	2.25448e-09	green	140.409	202.9	36.5851	144.934	90.4602	23.9058	14.1467	62.5537	1.27788	86.1409	171.399	10.9422	61.3115	231.959	3.37686	4.77069	197.571	8.15178	1.12773	18.2182	3.45246	0	6.48558	507.639	3.55343	116.508	4.46674	3.48382	0	1.11576	0.367337	0	0	39.2076	18.6597	34.6154
Aco020629	15.502	2.57245	12.9295	-10.3571	0.518808	0.00118754	green	24.2359	24.9166	11.2722	24.6033	29.0841	11.1685	27.9882	42.455	15.0291	31.9156	42.3964	16.0157	32.5256	45.6387	17.7521	20.7928	41.7906	14.1158	28.1884	30.8567	10.724	26.1315	28.6999	48.7567	35.222	13.9328	32.5505	18.3442	23.3151	24.1067	7.0395	1.49712	3.02454	18.6509	22.5286	20.1771
Aco017896	4.91193	2.128	2.78392	-0.655918	0.444654	0.00658539	green	16.5124	24.4996	7.90105	24.723	25.1596	10.9257	9.06742	45.7824	14.5875	38.7822	91.385	19.9756	24.9893	48.3865	19.0738	6.76075	70.5664	31.6993	9.6188	12.6957	4.73344	0.518344	6.36083	21.0648	26.7048	22.0749	0	7.71153	11.7381	8.21592	0.907269	2.1336	0.435486	7.53358	8.49729	5.36466
Aco003739	45.3545	35.0107	10.3438	24.6668	0.852776	4.03979e-11	green	99.6833	131.288	90.4858	101.644	110.306	97.9007	77.9418	97.7813	42.4756	157.879	114.437	70.3786	115.729	135.03	62.2848	78.7941	118.168	68.0513	73.1832	84.0549	71.374	40.5941	43.7657	150.446	46.3232	61.9913	38.1087	67.6203	50.4134	91.8919	44.4994	27.7759	35.0151	67.4122	65.1928	82.8239
Aco010770	52.5855	30.8811	21.7044	9.17675	0.787896	1.17652e-08	green	25.5582	20.5158	23.9679	21.9721	19.158	20.1433	17.5149	17.6281	16.4197	29.966	14.6875	14.3465	19.4517	16.2623	11.9027	16.7577	16.5689	12.5633	15.7847	19.869	14.0446	18.234	16.2913	28.998	13.3882	15.5984	16.9969	14.1206	9.45243	9.01526	12.637	7.36531	9.80871	9.51297	9.42468	9.33969
Aco015471	8.91465	6.45572	2.45893	3.99679	0.690532	3.14981e-06	green	1.61871	0.840591	0.942491	1.97859	1.33255	2.30282	0	0.85503	1.35058	2.2799	0.417402	0	1.55699	1.10556	0	1.24501	0.938138	0.843087	0.592538	1.27972	0.665769	0.719694	0	2.86284	0	1.63712	1.62542	0	0	0	0.365151	0	0	0	0	0
Aco007695	42.0557	14.4715	27.5841	-13.1126	0.663576	1.0273e-05	green	15.868	13.3795	11.8581	12.1983	10.3375	10.88	9.15492	7.45948	6.40186	8.49854	7.62554	6.24413	12.603	7.47236	5.59263	7.70197	5.96193	4.05614	8.52173	3.77121	4.49887	13.5928	9.93154	12.7835	6.53783	7.2703	11.1418	5.30372	4.95415	6.45031	5.91566	2.3791	4.24812	4.86273	8.95088	5.62031
Aco017049	53.6443	43.2415	10.4029	32.8386	0.826836	5.1624e-10	green	324.244	239.34	160.529	246.707	192.544	179.912	28.9908	60.3915	8.80963	126.17	210.578	37.9308	71.1695	102.798	17.3008	9.01623	102.959	17.1298	6.34638	40.4461	13.907	0.677292	9.08411	730.788	83.3124	273.846	13.826	26.6921	6.55357	25.5338	27.2867	12.5564	19.7966	6.38057	11.8935	4.51198
Aco017030	67.1661	29.8712	37.2949	-7.42369	0.737656	2.85595e-07	green	83.671	81.2827	49.4273	104.172	76.3072	51.9233	35.0197	48.3259	22.828	65.6419	80.8099	38.0666	50.8973	76.2583	27.259	26.1231	70.4095	30.5207	15.3478	35.3598	44.8636	13.1563	23.5942	48.4992	36.4478	39.2589	24.5496	36.3651	22.3478	31.2396	55.3804	27.1491	35.8231	37.4246	30.5938	46.9102
Aco007581	28.7654	15.5193	13.2461	2.27324	0.777037	2.51048e-08	green	54.4117	60.6788	52.7361	51.6856	57.4672	58.8128	42.3058	46.2094	33.2616	64.6266	61.1124	34.5491	60.3287	68.7108	35.7598	40.0265	55.61	57.9751	49.0091	52.9721	65.3457	31.7232	34.2786	85.9732	47.8605	67.3908	30.5837	50.0524	37.7273	58.2583	27.9332	23.229	22.7867	45.4723	43.7617	53.3793
Aco019908	29.3555	24.0761	5.27939	18.7967	0.768655	4.38148e-08	green	12.435	15.4382	6.09085	8.18264	5.73263	2.8175	1.76412	3.30215	0.221169	2.62488	6.43773	0.367649	1.76902	23.0636	0.389307	1.00684	18.3122	0.761536	0	2.43599	0.537713	0	1.78745	23.9489	0.524567	10.6536	0.203321	0	0	0.443941	0.260327	0	0.717696	1.52207	1.93666	2.67099
Aco017298	25.028	14.0822	10.9457	3.13652	0.710741	1.19167e-06	green	118.807	146.228	57.2246	69.8477	74.9151	43.399	43.3286	54.0094	38.5154	53.6741	50.2953	27.4627	53.8709	60.8417	34.2103	60.665	57.4215	40.8796	57.4427	90.6981	67.6698	56.6236	63.3086	93.9483	27.6728	61.2873	64.2315	48.0918	38.7693	32.4605	32.8076	33.8561	35.6179	59.9959	55.9088	45.9702
Aco013138	50.5748	30.8471	19.7276	11.1195	0.809779	2.21582e-09	green	66.5859	77.0157	62.1253	57.7352	59.879	49.5801	30.2216	53.281	27.7057	54.0865	57.674	27.0333	44.1073	92.8178	25.5989	26.7793	91.3857	58.1817	22.9229	66.5305	49.1505	44.9129	25.4433	95.7897	17.7627	63.6629	24.972	24.7029	12.3982	12.7432	15.681	10.3972	20.9193	47.966	42.5689	48.2815
Aco006799	3.17478	2.44751	0.727273	1.72024	0.537188	0.000729656	green	5.34355	23.9451	8.26146	4.21505	9.42178	1.10818	7.0458	9.92338	0.748892	9.04391	19.893	0.032289	14.5616	14.5713	0	7.67743	8.50564	0.90617	5.39649	0.583937	0.770162	0.268801	0.267716	0.915051	0	0.446079	0	0.195088	0.044314	0	0.486936	0.711243	0.792615	16.1808	6.05431	2.7757
Aco017810	27.0901	12.5636	14.5265	-1.96294	0.677881	5.5698e-06	green	78.8598	75.5365	81.9824	65.396	72.7293	73.9026	65.0864	67.2284	57.0065	91.7224	61.7281	60.6992	76.6116	64.9108	55.3773	63.4512	51.8062	55.0575	69.2001	54.4118	47.628	71.5959	74.0497	88.7793	60.91	86.7619	73.3331	80.7994	48.5799	52.8991	65.4732	47.4073	52.0973	57.6836	54.1823	51.9074
Aco007625	162.856	94.019	68.8369	25.1821	0.910705	1.30487e-14	green	124.503	128.044	69.9627	107.35	88.7204	52.6413	25.8412	34.2629	15.3324	68.4413	62.367	21.8249	42.3008	82.02	16.2361	21.8083	38.2364	19.9656	23.7092	19.7473	19.1517	13.9574	20.8157	102.306	17.3394	41.7037	15.0805	22.9428	22.6437	17.3493	16.2864	21.7339	17.2335	18.7519	26.1952	27.8558
Aco002951	64.5217	46.5553	17.9664	28.5889	0.844339	9.72973e-11	green	140.887	166.815	93.1335	179.255	138.679	105.705	47.6279	81.2103	18.9411	100.199	163.017	49.843	61.3792	217.274	38.0288	29.6706	222.638	77.9216	25.6779	84.8291	43.1652	21.7777	31.7395	309.102	43.6476	204.948	25.6849	21.898	16.7729	27.9361	20.0231	8.11375	13.9067	74.1536	64.1191	108.219
Aco015863	11.9888	9.75053	2.23822	7.51231	0.621234	5.27135e-05	green	13.666	28.131	4.89443	24.9975	31.5987	5.91083	6.5544	23.6993	1.09264	37.8045	70.6701	1.26582	19.2485	36.0601	0.123623	2.32667	18.0025	0.89094	2.75168	6.90468	0.2582	5.27938	1.69412	33.2247	3.27455	1.07654	4.23386	10.4517	0.694176	0.755829	28.9665	4.701	7.83186	4.86422	2.18894	2.11112
Aco026555	2.30699	1.26592	1.04107	0.224845	0.457547	0.00501986	green	1.08605	1.94051	0.676365	1.00476	1.32479	1.06876	0.568113	1.46375	0.537818	0.863548	1.5929	0.636724	1.35206	1.3235	0.520176	0.689298	1.35848	0.523825	0.680137	0.355172	0.423303	0.994672	0.374096	0.427587	0.270659	0.47219	0.555616	0.612457	0.40446	0.694324	0.971267	0.884289	0.745357	0.899961	1.06808	0.97957
Aco006391	6.26323	2.71112	3.55211	-0.840981	0.481808	0.00292643	green	15.4515	5.10832	10.706	14.846	3.25282	5.57236	7.04902	3.08001	2.15631	6.56918	0.210545	1.16882	8.1851	0.25814	1.90906	6.74347	1.36225	2.20391	4.50114	2.02106	2.29414	2.75407	4.46731	13.3902	3.31919	0.480857	2.90116	5.70599	7.37642	7.82756	1.64359	2.00624	2.16496	3.95329	3.65227	5.04821
Aco007962	57.1646	29.2407	27.9239	1.3168	0.758307	8.4477e-08	green	31.4381	29.0831	22.2993	22.4325	17.5146	14.2572	12.4787	12.8097	4.97698	29.4715	13.9586	4.67892	17.6219	17.6081	4.33078	13.2817	11.4743	6.53853	26.379	25.9384	13.7515	21.7325	16.2746	26.4863	3.42032	13.8886	15.547	6.02266	2.07075	1.74652	5.92035	3.92433	4.47242	10.1664	7.06646	6.05426
Aco009379	50.6417	30.227	20.4146	9.81244	0.801628	4.22686e-09	green	90.8522	105.876	89.7031	75.8267	82.1353	72.2963	60.8029	58.706	41.1658	85.5463	73.7028	52.2963	74.4275	82.4833	49.6981	62.0558	75.2778	57.4957	70.1142	62.5561	59.0417	89.411	68.6427	70.5416	44.8126	82.0375	61.0063	46.2608	42.4487	53.5661	50.9508	34.1315	40.4585	67.6901	63.855	56.2784
Aco013880	37.0019	17.9279	19.0739	-1.146	0.699844	2.03262e-06	green	74.0779	94.996	38.7396	74.6986	77.776	34.1057	60.2733	41.7823	15.3975	75.8866	47.0636	26.0238	56.6943	48.3571	21.1206	38.5364	41.4423	22.3299	53.4423	56.9094	25.8578	21.0682	40.1767	39.2118	25.2584	27.5964	38.2678	37.1407	42.0519	44.2623	6.00495	5.15109	5.16259	6.92573	7.78971	9.34141
Aco009564	17.0177	4.97197	12.0457	-7.07377	0.60505	9.26439e-05	green	180.704	168.875	144.799	200	160.853	172.238	130.822	181.252	113.724	178.587	168.686	216.05	186.676	194.372	155.589	119.37	174.17	160.6	145.272	150.05	157.661	75.2454	87.739	148.011	123.335	149.583	86.4839	94.2641	78.4645	113.369	133.58	58.7466	68.4759	121.619	100.705	107.168
Aco001471	126.554	66.6421	59.9121	6.73002	0.886988	5.93039e-13	green	540.121	561.545	390.323	498.045	474.007	382.17	285.924	279.075	230.63	428.684	390.955	228.631	278.246	377.915	218.146	191.193	291.246	243.774	246.967	234.708	216.242	186.937	206.823	449.656	218.562	388.943	190.44	288.313	290.108	378.099	234.858	159.187	159.223	258.795	278.085	311.055
Aco003115	64.4254	27.3592	37.0662	-9.70694	0.709485	1.26886e-06	green	189.08	184.796	162.135	148.659	138.707	124.036	130.533	116.909	91.8568	182.252	92.7516	101.239	131.331	108.67	89.318	72.7764	84.356	86.2749	128.224	145.714	92.344	177.347	143.396	163.217	68.8131	155.418	147.237	115.42	64.2976	62.0042	80.8637	63.0602	62.3971	136.222	117.949	119.511
Aco013546	1.03101	0.51884	0.512173	0.00666657	0.492554	0.0022752	green	3.25288	0.668376	1.20705	0.463539	3.28529	0.724579	1.70683	0.609607	0	1.82669	0	0	1.10147	1.82348	0	2.00387	0.139455	0.502354	1.46575	0	1.66013	0	0	1.03174	0	2.03587	0	0	0	0	0	0	0	1.01565	2.43012	1.75238
Aco019007	125.789	70.6832	55.1062	15.577	0.889976	3.85094e-13	green	27.304	29.1013	32.6224	33.9426	33.9403	31.7793	3.75821	12.9034	2.2226	18.9044	21.0726	6.75278	10.5869	26.2861	3.22563	1.06531	24.2957	10.6181	0.830673	7.9325	4.65888	3.25539	3.54706	52.7478	10.6094	23.2257	2.89947	1.38573	1.77025	1.43227	3.17317	0.754636	0	0.389278	3.40131	2.98486
Aco005607	38.0301	9.72011	28.31	-18.5899	0.621104	5.2959e-05	green	92.6048	79.8384	100.891	84.9133	76.289	120.235	106.206	76.5345	40.6264	125.208	68.3081	85.8214	82.8146	72.2814	61.028	46.3106	54.9512	39.3112	51.9451	30.9432	21.8341	32.7968	77.1172	98.5428	92.0842	43.6801	84.8023	46.8861	30.2854	77.8795	7.46838	1.60939	1.81091	34.0542	42.7779	45.3012
Aco005160	18.8668	8.5406	10.3262	-1.78558	0.592177	0.000142009	green	236.849	277.308	113.199	185.893	146.381	75.8422	100.912	95.3942	71.2215	280.298	109.74	28.8569	107.213	67.7206	27.4366	51.9768	30.9197	27.4724	52.2879	24.5179	13.6641	277.371	164.153	315.585	49.4005	78.5564	182.271	77.2287	26.9017	17.2044	14.6757	16.0579	18.6414	357.32	210.327	170.758
Aco012684	60.39	41.0252	19.3648	21.6604	0.845305	8.82136e-11	green	185.444	326.778	197.497	264.754	320.209	211.247	112.856	137.456	34.3624	398.489	318.948	190.955	205.778	252.658	47.17	39.6848	127.039	41.1806	17.1641	101.808	84.1529	30.493	28.6906	276.099	21.8093	356.884	31.1823	38.2283	11.0568	8.73401	114.497	68.3169	35.9205	137.751	45.4163	54.2475
Aco003750	5.24892	3.42175	1.82717	1.59458	0.550268	0.000507094	green	4.63678	6.39377	1.53094	5.75986	6.62079	1.37675	2.28481	9.01554	1.74707	11.8519	16.1828	3.96277	8.5284	14.5999	1.38091	5.79015	16.3058	2.20421	5.26707	13.7179	8.60956	1.9362	8.91898	19.0475	3.39283	5.1391	9.36425	11.6688	1.79755	1.65596	0.198995	0	0	1.3929	0.820659	1.91834
Aco014417	31.6023	26.6526	4.94966	21.7029	0.830235	3.78928e-10	green	17.5632	19.305	6.08948	10.2693	11.012	6.54833	4.40563	10.3365	3.66975	14.1063	14.0358	3.96978	9.16037	12.5578	4.24813	4.64466	11.5658	2.36943	15.1027	3.91915	3.19459	1.20761	2.33614	22.1841	3.5887	13.4329	3.30254	3.03364	4.12596	4.78845	2.8863	1.89223	3.06444	11.4066	13.9894	8.85045
Aco011484	23.5991	7.09168	16.5074	-9.4157	0.569001	0.000293195	green	410.348	286.661	202.713	433.422	316.239	225.171	221.461	341.672	119.834	207.158	98.3216	75.2617	157.073	116.696	103.731	74.2332	107.4	41.6503	78.7381	35.0831	28.7246	113.833	162.451	314.829	211.846	53.8891	212.638	446.641	154.959	202.341	6.5777	4.0128	4.28015	16.1844	53.6664	25.2486
Aco010171	5.98072	1.56987	4.41085	-2.84099	0.43033	0.00879952	green	30.6032	21.8345	19.6708	27.8258	25.9256	24.0576	25.7067	22.8797	15.0885	40.873	24.5479	14.913	39.7951	23.6256	13.1492	30.9064	17.8813	13.4816	18.2511	15.2893	10.6265	16.7426	19.5148	31.5278	32.2209	12.686	21.4309	31.0941	16.6214	28.4717	37.4827	4.28686	12.866	11.0946	13.0708	9.83808
Aco018251	8.13483	2.70056	5.43427	-2.73372	0.517034	0.00124291	green	78.1205	51.6226	75.957	98.173	63.9523	84.9348	65.0476	60.3264	32.6525	74.2778	50.9836	67.3059	81.0069	55.972	49.9159	65.5863	97.004	56.6885	48.5727	63.8028	43.0952	32.5552	53.7437	76.3891	80.2444	46.6885	45.0167	64.5665	39.2068	53.8025	48.5624	31.6648	31.9336	25.7266	35.3228	26.5175
Aco003268	49.3075	41.7833	7.52415	34.2592	0.868786	6.49289e-12	green	90.8383	90.7652	86.5537	79.8902	80.5446	71.6234	68.2744	74.3833	44.2901	133.248	93.5039	55.9611	88.421	89.9367	52.5365	55.792	68.2794	55.0617	63.3914	51.8048	40.3331	45.6399	56.5607	127.498	51.9428	125.957	61.8717	55.6023	35.0694	57.0592	45.4202	35.3352	58.5652	56.4698	61.9882	61.0471
Aco014818	80.9389	30.7483	50.1905	-19.4422	0.794018	7.52512e-09	green	168.974	153.346	115.039	120.139	106.971	84.2687	105.208	74.1561	67.8685	123.704	113.399	75.9044	88.0586	93.35	62.9241	102.657	75.7657	58.0805	85.9385	49.9333	40.9763	70.1524	107.823	151.502	97.8264	76.1866	96.7838	76.0122	82.6721	61.5976	11.8455	9.14546	9.78186	49.9574	60.0494	62.896
Aco014098	30.486	14.5522	15.9338	-1.38169	0.647448	1.97236e-05	green	95.6788	98.3395	62.293	105.016	92.7071	62.0527	77.2919	54.1752	28.2832	128.557	77.1906	31.7253	104.719	68.2842	23.5767	50.9885	40.0695	29.192	57.2774	25.2857	21.9484	50.0841	59.1948	73.4001	33.7638	49.1588	68.3548	95.2534	50.1203	37.5436	78.6473	36.4012	43.8121	30.9034	24.1392	28.0312
Aco009139	10.6805	3.62728	7.05319	-3.42591	0.444474	0.00660997	green	115.336	127.841	119.734	84.8399	83.1686	88.5552	59.5129	79.9253	105.259	109.322	79.9233	93.5282	89.2485	92.1343	91.4814	68.1442	82.2437	113.56	94.4832	114.672	117.754	113.029	94.8671	115.809	55.7863	149.865	82.2932	67.4235	65.1879	70.234	80.6708	61.1464	75.8091	124.895	107.536	102.351
Aco020390	1.01444	0.562404	0.452033	0.110371	0.0421032	0.807376	green	0	0	0	0	0.456941	0	0.727757	0.294814	0	0.623495	1.22198	0	1.88546	0	1.11553	0.714074	1.42326	0.988739	0	0.794875	1.03188	0.295207	0.743713	1.9172	2.63039	0.709768	0	0.58269	0.814321	0.77277	0.318335	0	0.217618	0	1.34757	0
Aco015792	38.1671	15.6745	22.4927	-6.81819	0.6375	2.89505e-05	green	58.902	58.3282	41.536	43.756	34.7117	24.0216	37.5082	29.1242	21.025	57.4617	32.8139	21.3019	38.6398	34.4723	19.9815	24.7491	27.0409	19.4924	24.808	48.6556	28.6859	51.8597	39.3676	43.2468	17.6575	43.8041	39.8868	39.1418	15.7761	16.0911	15.1469	13.2286	12.8482	64.705	43.0388	42.534
Aco006853	30.5551	11.0653	19.4898	-8.42447	0.714456	9.87859e-07	green	67.2612	60.3588	60.9181	43.4342	54.0117	64.0112	30.9725	51.6725	34.9094	35.3357	41.806	41.7281	34.0801	51.3571	31.9479	27.4304	31.149	26.8323	33.1306	23.054	28.5805	52.5373	41.2885	66.7835	36.0075	40.7419	30.5611	43.9994	39.9267	34.5634	25.0109	13.5951	17.4376	43.94	39.9652	48.0794
Aco007870	2.81178	0.402187	2.40959	-2.0074	0.250297	0.14093	green	3.95028	7.38999	8.62701	4.54177	8.97974	7.03196	3.49855	11.0074	10.9143	6.31477	11.7948	12.9466	8.79315	11.5036	7.90902	7.57827	12.4254	6.60082	4.64188	3.81137	5.45574	2.85718	2.30129	6.51759	4.1829	18.6164	2.30491	1.58023	1.11687	2.13194	4.52207	10.6217	5.99179	2.88816	3.05297	3.3275
Aco001507	35.4069	8.34291	27.064	-18.721	0.590076	0.000151998	green	31.3381	43.8663	26.0069	22.3331	30.5629	25.7965	10.465	20.0843	22.7337	18.1389	36.4851	17.404	17.8618	29.6177	17.5125	14.6523	26.0633	17.957	9.90585	35.6962	26.483	14.379	14.9378	26.5555	14.5384	30.546	13.3942	18.3457	18.2865	17.9565	19.3309	20.0857	20.7468	30.4653	20.8358	23.2631
Aco031153	7.50228	1.05892	6.44337	-5.38445	0.469185	0.00389368	green	12.404	15.8708	16.756	13.0569	19.7095	19.0451	11.5866	17.6757	15.499	20.2863	13.1384	16.6784	15.1581	10.572	11.6384	9.37582	12.1004	10.6586	6.73899	23.4734	12.7211	3.59822	9.46041	13.0834	13.9522	14.9612	15.2382	11.735	8.00767	7.11261	5.70392	8.11692	7.27527	5.43243	8.01479	5.33575
Aco001756	12.6224	5.58548	7.03694	-1.45146	0.609433	7.97658e-05	green	6.10948	3.44886	2.36908	7.62814	1.75146	1.20712	2.94466	1.83179	0	4.08531	4.08256	0.481148	2.49616	5.77541	0	1.05657	3.00485	0.130491	0.230443	1.87422	0	3.27462	1.67864	6.62683	2.03645	1.53298	0.18369	0	0	0.258528	0.586404	0	0.303028	7.02031	7.16404	6.30448
Aco006486	23.2808	6.87544	16.4053	-9.5299	0.644829	2.18494e-05	green	194.45	175.145	140.978	205.3	177.272	140.711	61.2334	83.9026	50.5579	162.269	115.397	65.7974	113.855	159.23	65.8388	48.7945	113.54	85.4531	62.553	104.839	176.373	36.7182	29.1679	180.484	56.2437	164.081	23.9795	72.6785	64.2788	172.325	120.904	100.294	96.5413	138.292	92.7263	214.857
Aco010105	6.84223	1.61457	5.22766	-3.61309	0.489378	0.002453	green	15.5949	18.2049	11.9191	12.2003	17.0724	9.5188	17.4162	10.7902	11.8768	27.0466	18.962	15.3406	17.0836	14.3462	16.7723	18.0368	12.1449	10.1398	19.4715	7.89468	8.68525	14.6875	14.8698	22.7769	13.6834	21.0647	9.38537	12.9474	17.3214	14.2615	10.0333	9.36451	11.4419	5.05349	6.33899	5.87328
Aco021658	92.9966	39.1623	53.8343	-14.6719	0.783478	1.60979e-08	green	242.844	267.421	193.054	261.106	247.266	197.383	155.065	132.176	77.5354	176.313	189.773	131.019	164.278	204.712	106.851	110.861	169.787	100.256	102.513	104.261	131.934	81.795	88.4568	179.336	129.269	121.842	88.4746	96.7599	101.18	193.729	154.792	67.8157	50.8809	76.2439	91.6506	128.755
Aco000631	34.3969	5.46497	28.9319	-23.4669	0.625512	4.51751e-05	green	50.4952	54.2483	61.0297	52.8679	58.2431	67.6771	42.911	33.9012	39.2967	66.2217	54.8988	49.5599	39.0649	42.6235	43.7178	31.4922	41.767	26.6498	13.3692	26.4593	39.629	23.2771	38.7451	61.6795	55.2495	74.9237	37.7723	43.0908	27.9412	76.4394	19.6917	9.63162	11.1546	31.8612	31.9441	36.1835
Aco013418	1.27069	0.831696	0.438991	0.392705	0.47964	0.00307583	green	1.96941	3.11951	1.96063	2.89772	3.97789	2.50913	1.83076	3.00463	0.6297	2.92631	5.6297	1.06733	3.14539	2.10747	0.252577	2.38982	2.48266	0.846427	3.82606	0.717685	1.33223	1.81933	1.77292	2.27139	0.564946	1.81857	0.909257	1.18232	0.676434	1.09695	3.02038	1.29645	1.62849	1.49315	3.87601	2.61705
Aco018506	8.61392	2.21895	6.39497	-4.17602	0.535252	0.000769072	green	48.2038	35.686	39.9959	43.1754	32.6103	51.4795	41.0575	42.6911	35.9696	62.2788	39.8207	46.9823	37.7351	32.443	37.2463	30.6954	30.3253	25.8635	34.374	23.1849	47.4295	58.0571	35.383	50.867	23.4229	47.1772	41.0175	26.5064	24.8701	20.9345	14.4632	20.3107	19.5446	43.5246	36.3055	34.7226
Aco017934	29.6477	12.3339	17.3138	-4.97994	0.608288	8.29624e-05	green	118.529	115.761	95.2016	94.4066	80.3736	62.268	74.0052	69.227	60.1066	97.1135	65.0304	53.7777	70.6062	68.9795	54.381	59.5201	69.5795	61.1292	61.6275	131.358	71.2592	111.419	70.9639	101.572	51.1136	110.267	88.741	88.9084	49.8677	49.5624	53.9665	34.8022	42.4862	111.261	86.5572	90.9934
Aco000190	34.1632	21.5527	12.6105	8.94219	0.746338	1.73567e-07	green	42.535	47.2511	41.1237	28.0289	32.9502	33.1982	21.8637	26.0633	20.9933	35.402	29.0191	22.388	31.7098	34.8796	21.7477	18.8447	27.1602	29.8787	29.5228	37.4905	30.0351	28.9237	31.1449	38.0532	20.9018	43.1111	31.0185	22.107	21.3244	19.286	24.5867	24.7061	24.0227	30.8247	30.7263	30.8085
Aco022697	131.438	95.9507	35.4875	60.4631	0.922299	1.34365e-15	green	256.456	262.148	111.369	223.523	222.317	78.4761	103.433	99.2033	28.2156	284.916	168.326	39.7714	131.237	139.823	31.3834	49.5006	73.3419	31.299	48.1371	30.7742	32.6127	75.9487	98.8	279.284	34.5982	107.258	106.638	87.5847	21.7635	16.6592	12.2965	12.5563	10.2678	31.0779	29.1673	28.18
Aco015343	35.0565	21.4511	13.6054	7.84575	0.739727	2.54047e-07	green	101.992	97.5111	92.9015	77.34	75.0753	77.8429	64.4067	65.1666	57.3256	101.7	61.8156	48.2145	73.5289	80.6432	56.3251	49.933	69.0461	70.4694	68.9385	105.379	76.6703	57.75	84.4372	101.03	50.645	107.722	82.6751	58.388	43.1485	49.0911	46.323	43.3204	48.1544	86.6145	71.8034	75.4183
Aco018451	6.01295	1.24744	4.76551	-3.51807	0.343541	0.0402275	green	329.696	599.692	251.231	397.538	579.391	224.554	120.614	515.61	317.275	578.958	825.234	431.45	275.666	618.835	331.079	44.0195	365.644	287.789	68.2577	39.9871	55.5687	12.3368	43.7072	698.335	163.125	532.131	41.8378	1480.95	1115.76	751.013	36.6184	37.3564	33.6101	165.858	192.894	146.475
Aco006189	40.01	15.2036	24.8064	-9.60273	0.669474	8.0134e-06	green	563.497	748.144	484.599	728.746	786.838	538.745	322.868	446.678	248.908	563.321	668.688	452.694	478.437	576.253	351.425	289.452	440.128	320.575	423.51	339.811	300.394	255.544	165.385	430.567	488.908	397.552	161.182	457.348	436.978	682.567	316.126	185.142	176.093	219.693	304.464	248.013
Aco023127	21.7886	3.57125	18.2174	-14.6461	0.545935	0.000573003	green	121.158	108.151	116.067	96.6944	92.9948	109.001	88.8151	90.165	93.4679	112.436	86.7011	73.7114	69.8731	91.0189	80.9577	52.5957	84.9085	78.1505	94.4807	48.0088	81.136	64.6268	63.1626	122.666	82.3373	78.6796	62.1262	98.2467	86.0449	127.967	64.9615	49.7902	61.4923	20.7001	39.3913	27.8703
Aco000772	69.5886	25.2286	44.3601	-19.1315	0.709792	1.2496e-06	green	127.61	128.993	106.835	120.034	126.865	80.878	111.319	66.9266	55.2845	155.385	90.9196	55.1926	91.4387	82.8246	50.6731	108.477	63.3362	52.25	96.5938	43.8834	44.4199	115.924	94.6475	116.739	56.0645	93.2781	97.5162	86.9558	64.4706	70.1773	62.1309	41.7005	48.1391	44.7376	50.3494	40.8861
Aco015466	12.7727	6.73105	6.04162	0.689432	0.626199	4.40589e-05	green	431.51	343.789	170.085	376.336	309.987	188.444	455.926	566.472	275.062	867.751	640.341	378.533	525.131	675.238	369.319	208.332	547.641	308.854	195.171	564.105	176.692	195.818	254.474	1082.35	471.645	505.305	446.106	643.722	395.821	228.754	58.6768	11.5186	14.0538	207.692	231.88	210.403
Aco026473	118.873	75.7492	43.124	32.6253	0.919789	2.26193e-15	green	155.305	147.68	153.198	100.631	114.759	122.095	80.4363	104.072	56.0357	134.181	102.96	68.2	84.3254	112.923	57.0774	63.3492	98.1507	88.119	60.7148	56.6958	74.5189	46.218	58.5234	173.422	35.7852	114.838	52.5417	40.9526	47.3461	46.7025	29.4143	26.9443	38.9865	52.7212	73.6939	56.9894
Aco004649	43.9285	28.4605	15.468	12.9925	0.797423	5.83102e-09	green	16.0311	26.3953	12.7605	15.754	19.5295	12.1499	11.0783	12.7546	5.06905	19.1056	16.4549	7.4058	13.002	12.1982	6.19165	11.3924	11.2031	10.0166	11.8138	11.7681	10.9232	11.426	11.591	12.2826	3.46174	13.1273	9.97405	7.34611	5.8891	5.56465	5.93815	6.72953	8.7813	7.63122	9.22669	8.44964
Aco007836	21.6631	13.8208	7.84236	5.97839	0.746996	1.67e-07	green	33.2827	30.8445	36.0052	27.7693	27.008	31.3165	17.202	26.6546	11.0212	33.4872	27.1224	23.8676	22.2635	27.666	17.1883	13.4779	22.8152	13.5178	24.8729	12.9589	14.7841	25.1348	21.8349	51.9414	34.4165	23.4573	18.8694	12.7459	9.4362	20.0752	28.7858	10.3819	14.6287	19.2397	22.7739	18.5292
Aco016705	127.837	91.0575	36.779	54.2785	0.923269	1.09351e-15	green	710.615	750.682	526.964	725.307	659.363	518.394	249.628	408.238	120.407	733.96	795.298	305.782	410.987	744.678	181.647	129.773	425.434	145.969	111.235	100.146	77.476	60.6049	163.431	1324.48	217.482	348.806	148.611	127.739	52.4399	127.3	33.4856	9.68886	10.9922	26.2578	39.6985	34.5468
Aco013979	34.5964	22.9469	11.6495	11.2974	0.777	2.51674e-08	green	25.178	25.2416	17.503	18.1752	17.7861	15.2885	15.7551	10.5323	8.83306	16.548	10.8823	10.4742	19.7975	17.873	10.1126	12.1244	11.3226	14.6178	19.393	11.0501	12.9163	14.7311	14.6132	21.8776	9.9227	26.9147	14.4476	11.7538	10.9164	9.70164	6.72368	7.80042	6.44824	14.5377	13.6052	15.2794
Aco022865	40.3909	17.2277	23.1632	-5.93544	0.68403	4.23687e-06	green	43.9664	43.99	40.4513	42.5459	50.8844	50.2642	48.2012	36.2265	26.4166	50.6417	39.6618	27.7683	36.8006	38.8995	28.0062	42.4352	30.3583	27.6646	39.8778	25.3605	32.4202	27.7757	33.2304	42.089	29.508	29.7269	29.7352	28.9617	24.3112	33.1932	25.5912	19.8225	21.5023	19.5088	18.131	16.5492
Aco012655	26.8714	13.2374	13.634	-0.396545	0.695054	2.55145e-06	green	43.4547	41.3021	30.2573	32.263	32.8707	26.3101	17.9533	26.2004	21.9144	43.0906	26.1356	16.9562	22.6642	31.8446	15.0703	9.96637	31.6609	20.7792	24.9201	48.5945	39.3851	30.6531	16.0009	52.938	16.5461	38.7137	14.8821	11.7068	11.1868	14.6368	19.2183	20.3855	26.6072	34.5198	34.1133	34.9169
Aco004840	33.4778	19.3633	14.1145	5.2488	0.783228	1.63822e-08	green	20.713	15.1276	7.52706	16.2252	12.4128	10.019	12.9094	8.44173	5.62847	19.8914	11.2973	3.93618	10.6342	9.43221	3.14337	5.95006	8.8686	5.57348	7.25672	5.81086	14.4378	3.89032	4.28454	20.8582	17.2351	14.8877	1.24756	0	0	0	0	0	0	0	0	0
Aco000443	34.6847	3.59514	31.0896	-27.4945	0.626175	4.40978e-05	green	103.516	127.865	93.0699	85.2074	130.881	92.015	87.5635	136.941	84.4337	105.298	125.631	88.3046	101.714	129.926	82.7958	68.9256	104.894	67.7725	90.1275	53.6604	51.3901	107.293	101.094	146.434	128.759	115.17	100.754	84.9332	107.801	122.03	47.0528	27.2619	38.9253	90.1677	96.3712	83.1652
Aco012109	12.0631	5.48864	6.57445	-1.08582	0.571519	0.000271698	green	31.1143	21.9406	45.4299	24.1573	21.8878	39.095	17.1162	19.0969	25.4329	20.3911	15.5031	30.6666	17.7539	20.9345	25.1392	11.1697	15.5224	27.9999	14.0944	14.1313	13.0041	19.6928	17.02	56.8841	17.5892	49.8764	22.7484	9.89798	8.92033	15.3272	8.51224	5.3897	8.9802	26.7614	23.7867	25.4814
Aco001078	5.88723	1.96788	3.91935	-1.95147	0.466207	0.00415868	green	119.186	131.483	120.632	110.237	130.188	140.777	105.595	83.6558	62.6779	199.529	126.311	104.108	122.518	110.015	74.7711	91.8442	79.3462	75.0595	61.9711	68.238	68.8248	118.914	87.5802	165.494	146.067	95.7263	84.643	123.316	84.6094	236.583	92.5942	60.1991	78.4342	34.3801	56.7913	53.2714
Aco004041	36.5636	18.5514	18.0122	0.539161	0.749471	1.44303e-07	green	142.034	123.442	147.201	103.168	111.023	130.274	95.4669	86.1231	53.1472	149.744	84.4511	67.5508	128.863	95.7192	57.7669	126.125	86.968	67.5221	112.29	82.5065	62.7547	81.6335	69.7274	162.728	121.363	86.6038	56.6881	81.6114	92.1423	86.4984	36.251	17.4552	16.177	54.4656	70.6468	52.3492
Aco001264	36.2822	14.6678	21.6144	-6.94653	0.656769	1.35926e-05	green	29.7127	28.323	23.6127	23.1486	18.723	16.301	16.9595	8.23619	5.90584	22.2412	11.4778	11.6042	15.5148	11.0527	3.92932	14.335	11.9037	7.14342	22.1517	27.6897	8.53779	16.1685	15.8246	17.7016	4.32522	19.0854	23.1908	4.28379	3.12972	4.14762	4.63777	5.013	7.81092	12.6928	10.5911	7.53514
Aco003572	53.4546	29.5879	23.8667	5.72122	0.794393	7.31819e-09	green	562.635	575.451	365.53	587.189	471.602	293.771	310.629	354.715	257.755	417.825	374.999	182.161	270.799	347.304	191.506	242.743	332.537	199.584	236.168	267.943	280.564	299.377	273.571	509.823	223.796	377.381	368.715	245.48	234.773	123.31	134.473	148.014	132.313	483.233	461.359	482.768
Aco013813	10.0738	5.37449	4.69935	0.675144	0.512847	0.00138276	green	78.866	73.781	39.9289	23.4161	51.2377	22.5968	0.649213	23.6028	12.3568	1.26399	12.7907	5.7263	4.67679	28.816	5.34752	0.711885	39.3001	15.5365	6.28003	44.4528	79.2534	0.837806	1.15702	94.0303	1.86211	183.44	1.50931	18.8165	5.271	6.48152	19.6926	15.0093	21.6648	39.9802	21.7637	35.47
Aco016246	45.9688	18.1904	27.7784	-9.58793	0.71842	8.06083e-07	green	38.7937	43.1303	22.7295	41.0203	44.6445	25.628	15.0316	34.501	14.7548	27.9823	58.7197	24.8659	24.0695	68.2191	21.5603	16.3577	56.2589	19.0695	12.2965	30.6717	25.1923	14.0617	5.80827	48.815	26.8058	30.637	3.7268	9.26053	22.7957	32.7092	8.40774	3.72245	2.96067	13.5171	14.831	16.0159
Aco021516	38.4314	27.6407	10.7907	16.8499	0.837777	1.86111e-10	green	63.6276	51.5948	47.8225	51.1369	46.3152	46.9299	46.5802	44.5261	34.6219	59.2049	39.3209	40.7405	53.5985	47.9163	41.8134	34.9619	45.269	41.8533	45.4517	46.7938	53.6981	31.4147	33.8288	75.0402	30.3071	48.7646	32.134	38.4153	32.7072	37.3673	32.1427	22.3427	21.559	37.5699	36.6631	40.6865
Aco014378	49.6997	26.5067	23.193	3.31371	0.76714	4.83364e-08	green	47.1132	57.5937	47.0787	44.7055	47.9609	38.0852	43.2941	42.2167	28.5013	60.7379	45.3361	28.6322	47.4302	48.4378	30.3285	36.3271	43.0636	37.7236	43.7927	47.8109	37.8879	53.7045	43.6743	57.3819	25.305	54.4413	48.1285	46.6041	32.2802	29.9497	31.5884	29.4689	30.8825	47.9822	43.1292	40.9375
Aco011747	82.5204	46.0662	36.4542	9.61194	0.83454	2.53616e-10	green	394.568	395.68	276.491	287.439	255.252	179.228	173.096	145.517	152.163	262.103	174.668	136.782	173.007	185.957	140.255	141.787	161.426	140.003	144.273	196.06	165.001	182.732	202.986	288.11	113.881	269.458	173.405	131.75	125.599	111.179	75.6699	88.5767	111.319	224.228	235.454	208.165
Aco010990	29.3885	12.7751	16.6134	-3.83836	0.674317	6.50759e-06	green	34.2662	33.4461	39.0338	29.7022	37.6765	35.6044	27.2835	20.9423	16.7174	38.0429	29.8486	22.7239	31.9074	25.028	16.0212	33.5169	15.6912	11.7388	26.664	8.86984	12.127	20.5949	18.9652	30.8157	22.1933	22.244	24.477	22.9585	22.0448	25.1902	20.4483	9.96567	13.1246	16.1285	26.3266	21.1993
Aco001835	5.83955	3.84702	1.99253	1.85449	0.646541	2.0437e-05	green	6.1072	4.74394	4.74235	4.43034	4.62057	3.77658	2.7776	2.68278	1.94124	5.54008	4.82191	2.99976	4.46259	4.42437	2.11602	4.86931	3.4373	3.13552	6.1135	5.34478	4.48242	3.35216	3.40119	7.35761	3.17703	3.44801	3.64622	3.04015	2.38268	4.58028	4.09554	2.47421	3.64681	4.48039	4.18158	3.74925
Aco024743	0.644166	0.426381	0.217784	0.208597	0.479664	0.00307418	green	0.816354	0.14521	0.466872	1.59173	0.230779	0.534643	0.422226	0.699565	0.176578	0.495414	0.046888	0.1396	0.829081	0.780753	0.014891	0.279749	0.27648	0.846654	0.47166	0.329087	0.260949	0	0.024318	1.23593	0	0.508834	0.024982	0.063885	0.357084	0.045656	0	0.686136	0.482406	0.178851	0.266905	0
Aco008515	12.2563	11.2702	0.986187	10.284	0.377881	0.0230713	green	9.90888	9.04176	5.63896	15.7782	8.12575	7.48935	18.0335	6.99442	6.26143	20.9751	28.9137	13.7439	29.7766	24.6009	13.1781	10.0006	42.7499	30.4765	1.98218	4.81107	41.2993	2.52101	7.68163	144.363	65.815	41.7636	6.40329	35.1095	19.3599	13.7553	15.4572	8.03463	9.18299	30.8187	21.9492	14.424
Aco023284	55.0205	25.2363	29.7842	-4.54791	0.793486	7.82769e-09	green	18.8107	18.4119	9.64481	20.1062	20.2131	10.5837	13.374	11.5743	9.01158	20.9852	12.5836	8.49416	19.4047	14.4444	8.36088	13.5106	11.1166	7.75169	17.6332	8.49452	10.4301	17.8775	12.2598	23.1662	8.93582	16.0641	11.022	13.8876	9.55578	9.54025	3.39969	3.94269	3.12408	13.4179	11.4303	10.6986
Aco015881	62.0985	51.0057	11.0928	39.9129	0.880588	1.43757e-12	green	14.2386	13.3048	13.2044	11.7996	13.5057	9.44471	7.93971	11.2918	5.00022	18.3615	14.0101	6.15642	13.8201	18.1697	5.78888	3.41167	14.0698	8.91089	3.87181	4.46931	7.05493	8.04639	6.10429	33.1262	6.56342	20.7919	4.8389	5.95916	5.55769	5.0253	1.09976	0.625462	0.560735	6.75246	8.09056	6.21212
Aco019006	90.5629	66.0466	24.5163	41.5303	0.888188	4.99338e-13	green	535.66	470.785	272.841	381.726	316.099	243.004	35.5551	151.809	34.5279	159.892	314.696	41.784	92.5445	286.23	30.5295	20.113	229.16	65.6416	18.9744	48.8605	62.624	214.175	75.9473	818.418	28.4778	211.041	50.629	46.0051	26.6592	40.4858	11.2882	15.5643	11.7562	52.2421	68.7678	48.0223
Aco013734	24.7721	3.58601	21.1861	-17.6001	0.614107	6.78318e-05	green	133.567	130.208	88.7263	144.188	132.409	77.8135	125.517	116.224	69.4821	130.94	112.423	130.826	118.606	123.691	93.7153	125.747	172.493	93.9591	107.813	119.611	101.486	75.8431	57.5994	152.971	125.276	91.0388	75.9538	125.183	85.8017	120.94	79.4284	14.7162	27.5192	78.5555	73.7025	78.2407
Aco000710	69.0089	28.1767	40.8321	-12.6554	0.722818	6.40638e-07	green	35.4647	34.9694	29.9991	34.3533	32.0189	25.3955	27.8692	17.8609	16.4209	37.4694	20.8222	19.2537	34.5837	22.3321	16.0567	22.2062	13.2422	14.5307	27.6183	12.492	12.7358	20.5706	22.1303	24.6062	15.9247	22.8322	25.8537	27.1183	16.2416	14.0224	9.32317	11.4186	9.68063	16.4095	18.2396	17.8222
Aco001443	62.0753	27.0322	35.0431	-8.0109	0.783288	1.63134e-08	green	225.082	201.988	147.344	237.342	238.543	138.859	64.0396	115.797	38.2118	144.541	187.731	44.8563	109.247	223.09	36.8644	33.8883	180.986	80.463	35.6911	312.476	198.118	42.9762	29.9666	280.484	62.2316	197.061	43.6256	57.4918	26.7135	45.181	51.6421	16.8866	29.1627	150.305	121.513	150.697
Aco011215	127.253	86.7384	40.5147	46.2238	0.938071	3.21072e-17	green	125.076	124.186	90.2918	98.7408	87.2638	66.3449	66.9331	61.6229	34.955	110.959	76.6867	42.0899	71.8058	86.2303	40.7172	50.1974	77.4284	43.3304	47.786	46.267	46.8699	39.931	50.3986	109.003	38.6208	85.7732	62.3624	79.5539	51.2198	47.4329	27.1939	21.2749	26.1176	48.1063	38.5984	47.4892
Aco004994	45.5488	4.10315	41.4457	-37.3425	0.532895	0.000819582	green	44.1962	75.4844	70.1819	41.6511	53.3086	70.0156	14.7312	91.8085	71.9512	57.1122	89.5858	88.4975	39.0906	99.3352	56.164	5.62345	68.4102	63.5219	8.84729	44.881	31.3789	2.79236	4.64346	69.9402	21.3347	67.4306	7.89263	34.5098	20.9969	15.4289	21.722	25.4056	19.1132	41.6478	36.2	27.361
Aco014896	66.2536	53.0906	13.1631	39.9275	0.882434	1.11943e-12	green	14.3579	15.4881	12.9287	12.7954	10.7161	10.5208	6.04732	10.7267	1.82553	10.7395	11.334	1.99257	12.3831	19.8333	2.66586	4.28991	14.0436	8.61715	2.60961	10.1038	6.44518	1.47781	2.00181	31.4281	2.34928	10.2264	1.91092	2.41189	0.574854	2.4897	0.923736	0.770314	1.53649	4.22656	4.71638	3.83322
Aco006819	11.3917	1.0239	10.3678	-9.3439	0.386737	0.0198056	green	42.0934	43.095	62.8948	37.6138	38.4704	55.8494	25.9356	35.8269	40.1902	51.012	45.2247	58.8898	32.1087	39.871	54.6722	21.2551	31.3965	50.4099	8.9496	20.2959	44.4438	54.6188	18.1019	52.6755	26.103	79.6006	27.8655	48.6953	26.3996	30.5104	22.5295	32.221	22.4852	50.4278	37.1816	48.2096
Aco018512	136.74	76.4293	60.3104	16.119	0.871916	4.41633e-12	green	963.573	739.676	360.981	904.27	716.665	278.449	121.414	160.716	11.6623	537.939	418.701	39.6293	157.007	223.158	16.8643	27.8029	92.6263	17.393	9.86251	10.2528	5.99843	8.35807	20.6687	800.768	99.6778	95.3509	26.092	44.8973	1.84319	28.2609	17.8904	1.65886	4.01704	0.635387	2.26151	2.35987
Aco029167	6.67723	1.13461	5.54262	-4.40801	0.495945	0.00209791	green	81.8091	45.5005	94.1928	89.5787	56.6809	77.0758	43.1351	56.9963	53.4837	81.5586	52.2963	65.4052	69.4376	75.4114	59.3991	25.2616	49.9272	52.5215	19.9531	21.5341	46.5996	74.9676	19.6878	133.456	152.821	108.279	33.1204	53.1716	18.0396	50.3903	35.694	36.3687	31.8975	59.1657	62.5856	81.4435
Aco006883	7.05897	5.58696	1.47202	4.11494	0.599756	0.000110677	green	5.89711	4.67641	2.82356	13.1595	5.4593	1.3823	4.76848	5.17672	0	7.153	10.6111	2.63576	7.46639	10.7237	1.4789	2.10389	25.8812	3.6089	2.31279	7.20715	1.32306	0	1.17491	20.8092	5.45434	7.42904	2.73822	4.94291	0.286077	0.380137	4.30651	0.63163	0.566846	0.354187	1.48854	2.57836
Aco005779	41.1113	13.9333	27.1779	-13.2446	0.706994	1.43573e-06	green	27.1989	28.7294	17.1482	23.0367	25.9384	20.1878	22.7904	24.6308	10.9395	29.2424	25.9233	11.9692	29.2455	29.4632	11.9335	21.9344	20.5482	11.8596	28.784	18.6679	14.4354	18.9059	18.956	28.3158	21.0939	13.6211	20.7764	18.324	18.6774	23.0038	7.93606	7.02079	8.22462	11.7341	16.89	14.3342
Aco025483	19.0283	14.0637	4.96466	9.099	0.710535	1.20406e-06	green	9.05051	11.7089	14.5875	7.11646	9.23672	13.0108	3.46897	6.86454	3.78044	6.2277	9.06485	5.90551	6.80599	12.1043	3.5651	5.86202	11.8637	7.05316	6.07175	7.08974	2.34628	3.19198	6.28295	22.5281	5.65025	12.1776	6.28961	3.29756	2.22784	3.48108	2.30228	4.57253	6.07092	9.4636	11.2679	11.4611
Aco022104	36.3544	18.3985	17.9559	0.442651	0.709934	1.24076e-06	green	82.9803	109.424	61.5243	111.894	107.536	62.6537	37.9765	98.6863	34.7635	96.8045	135.808	51.9592	70.012	133.98	35.3957	36.6788	153.203	52.2022	33.7136	106.212	49.3065	14.703	24.8221	115.79	39.6334	117.536	28.4729	51.1731	22.6527	24.234	47.3645	46.9567	50.7162	105.582	81.7513	84.4607
Aco009288	51.3538	26.9076	24.4462	2.46137	0.759964	7.62155e-08	green	24.7325	21.0516	23.0934	19.4163	14.2021	17.3341	11.7615	6.87977	3.91935	18.7097	9.65556	6.94413	10.7545	10.7467	5.70003	12.1262	8.81753	4.80898	8.13516	3.76673	5.13181	18.7709	10.0131	26.4119	6.68881	10.301	5.00473	7.85754	6.2266	6.20537	11.4036	6.08784	7.93341	3.38266	4.91595	4.88532
Aco011340	12.3729	4.16297	8.20989	-4.04692	0.510996	0.00144886	green	121.944	88.058	56.2599	104.087	82.2044	52.8887	69.0221	55.4239	51.2372	86.6367	60.2249	51.8086	60.1323	57.9548	49.8794	50.4724	65.0141	50.7444	81.3608	114.013	75.5532	65.5446	55.1422	85.4643	49.6381	82.838	78.688	72.4958	45.7653	36.4745	63.3972	57.4752	57.8095	91.1758	85.9837	94.2485
Aco021743	22.0426	9.72712	12.3155	-2.58839	0.71269	1.08038e-06	green	17.7166	17.8048	19.2492	12.7905	18.6794	17.4196	12.6717	15.7743	10.0092	12.2071	14.6767	9.96763	12.2325	15.2857	10.1427	10.3504	15.0565	11.3795	15.6772	14.5149	12.4757	15.1204	11.2443	19.2272	13.7451	13.478	9.38185	8.905	9.36859	16.7412	9.00866	8.48631	10.7195	11.368	12.864	11.3098
Aco019270	4.11355	1.23704	2.87652	-1.63948	0.315995	0.0604516	green	4.8176	3.56727	1.09038	5.82511	4.18543	1.96082	4.97766	1.32183	0.395535	6.85097	4.59274	1.08489	1.64521	1.44812	0.735809	1.93314	1.19513	0.482966	0.2243	0.42986	0.40911	0	1.24225	13.4604	5.89166	3.60522	8.85713	15.9794	12.0738	6.26966	0	0	0	2.28642	0.315785	1.0678
Aco016263	28.9962	18.8807	10.1155	8.76521	0.765036	5.533e-08	green	152.158	185.304	98.1297	119.749	191.797	67.8776	18.1086	46.6016	15.9778	98.0474	167.62	31.3472	40.9883	116.365	22.2956	15.5724	77.5596	7.28652	4.59074	47.0203	28.3266	202.637	7.22827	251.93	33.8846	105.024	6.56578	11.4076	7.40979	8.35239	21.1862	17.056	22.4402	116.542	132.706	131.662
Aco009661	93.8226	52.6288	41.1938	11.435	0.817776	1.14044e-09	green	774.951	782.532	596.414	1225.42	1085.73	623.699	384.608	430.35	29.9102	929.218	982.716	275.845	578.479	739.984	98.3166	155.678	652.932	120.165	23.3901	180.403	118.396	28.7731	32.3623	767.092	337.332	385.698	123.016	324.986	12.8652	483.577	502.714	14.7136	24.6689	73.8541	107.346	161.007
Aco001563	192.405	109.263	83.1422	26.1209	0.926926	4.90495e-16	green	2528.07	2746.09	1677.83	2406.16	2555.72	1387.41	430.145	792.766	140.276	1437.17	1968.33	495.603	864.588	2045.69	260.821	230.809	1203.8	306.273	77.8182	191.512	267.049	165.747	96.036	2633.78	546.354	1443.09	135.793	532.204	212.735	551.692	436.087	88.1647	138.7	246.92	336.658	422.944
Aco004843	90.6464	59.218	31.4284	27.7896	0.87709	2.28367e-12	green	350.415	280.217	198.386	253.746	175.718	145.623	211.731	145.053	82.6685	271.893	167.131	119.448	196.428	155.074	84.0089	122.296	133.789	96.933	93.2301	107.182	85.6052	163.636	166.485	393.018	103.894	235.047	207.909	174.84	76.0702	89.7276	58.9939	30.7549	33.529	104.74	119.926	112.711
Aco022326	1.0729	0.810077	0.262818	0.547258	0.107938	0.530919	green	0	0	0	0	0	0	0	0	0	0.524394	0.571704	0	0	0.22861	0.403853	0	0.516513	0.339731	0	0	0.262602	0.220419	0	1.60979	1.22747	0	0	0.283926	0	0.384778	0	0.176835	1.18844	0.671635	0	0.27399
Aco008679	88.1615	47.7296	40.432	7.2976	0.872895	3.9071e-12	green	146.809	143.873	106.572	115.278	111.784	94.1343	76.8791	85.9771	52.0305	98.9709	83.6309	42.7541	81.0836	108.047	51.4489	60.5502	80.1624	54.1034	65.8116	114.911	66.8982	40.0283	51.7913	127.328	53.9463	82.8434	59.5741	79.3548	63.2612	72.0857	16.6737	15.0027	17.0722	32.2652	46.621	40.2615
Aco002928	29.4554	10.9863	18.4691	-7.48281	0.709685	1.25629e-06	green	19.4431	25.5021	20.8007	18.1906	18.3278	20.078	18.216	21.52	14.5849	12.9625	15.0124	13.6679	18.2061	16.3088	9.48071	15.1566	13.2178	12.5038	15.1217	11.5315	11.5264	7.77175	15.7042	20.891	12.2499	14.0801	12.6923	17.8158	14.4866	12.506	7.94838	5.78998	6.92076	9.60494	10.5764	11.2406
Aco003405	9.24291	8.11227	1.13065	6.98162	0.555317	0.000438877	green	2.73036	4.65713	1.56262	2.48803	4.0082	1.03338	1.01753	3.64672	0.703379	4.98568	11.6843	2.76699	3.49794	10.9401	1.27443	2.38515	11.2171	0.831373	0	3.07511	0.127566	0	0.627946	17.371	0.959794	28.1191	0.310098	0.510215	0.836606	0.405085	0	0	0	3.91629	3.03159	6.6863
Aco017563	24.922	5.15724	19.7647	-14.6075	0.601151	0.000105642	green	91.5886	101.544	111.984	75.5568	102.725	100.393	63.2565	77.7143	103.231	115.151	82.0573	97.1492	99.1057	72.6447	81.2413	65.4826	77.1961	104.403	31.0818	36.2707	37.9808	15.3414	53.2475	150.951	150.558	181.769	49.0372	0	0	0	0	0	0.07481	0.092424	0.057433	0
Aco004206	10.517	7.22879	3.28825	3.94053	0.551887	0.000484255	green	0.648426	0.610353	0.368106	0.32051	0.292989	0.099777	0	0.315337	0	0.271338	0.849666	0	0	1.10204	0	0	0.545494	0.079001	0.262593	0	0	0	0.108492	2.56972	0	0.099154	0	0	0	0	0	0.135535	0.232202	1.72033	0.393596	1.20267
Aco018578	35.956	20.2943	15.6617	4.63255	0.715975	9.14164e-07	green	218.829	352.5	148.362	228.335	323.272	142.926	97.8229	198.981	134.341	156.264	368.194	131.983	141.734	375.914	108.976	43.1149	260.932	169.551	70.3731	176.472	96.3532	57.7535	74.4919	294.1	50.9166	391.695	77.0124	108.578	61.1954	50.4752	128.386	163.499	132.849	186.808	114.746	145.411
Aco003317	8.92321	5.82083	3.10238	2.71844	0.616166	6.31051e-05	green	703.448	1085.57	558.382	893.393	1325.47	605.032	487.877	630.823	190.394	968.567	1384.36	330.648	761.636	1009.57	174.681	508.242	498.404	195.891	316.273	303.833	179.354	329.824	462.28	913.592	142.256	596.15	709.19	1334.05	246.135	241.46	1198.28	199.079	346.353	258.123	174.224	230.772
Aco004864	19.4288	12.0009	7.42797	4.57289	0.655833	1.41183e-05	green	68.4712	78.5592	71.6179	54.1623	52.366	54.5256	52.5878	53.6541	56.0965	74.4136	52.4494	47.1443	59.2855	54.6228	44.7006	35.832	41.1363	54.1087	62.3549	68.8235	48.4692	65.7789	59.326	82.7259	40.1874	83.834	54.6511	54.2938	44.4076	32.6047	43.5701	47.4108	50.1146	63.6583	57.7439	54.1795
Aco001499	131.533	77.1414	54.392	22.7493	0.873147	3.78518e-12	green	204.792	186.197	145.331	252.95	175.418	137.998	74.1384	69.7621	10.0866	190.823	119.553	28.2138	102.453	113.662	12.3181	31.5068	58.323	11.3932	13.9335	11.657	10.6445	14.5245	50.2074	197.984	29.0727	26.0808	52.1374	86.8057	23.4554	60.4176	12.9999	2.43697	4.19311	8.0077	16.1511	16.7198
Aco007964	57.1514	26.7281	30.4233	-3.69515	0.756244	9.59214e-08	green	123.204	171.055	181.723	97.8412	134.695	178.882	65.832	107.884	115.31	117.406	149.619	126.694	106.43	179.122	106.598	59.6289	118.297	125.997	67.6584	107.238	103.074	71.9716	73.1541	215.755	65.4076	218.844	64.0314	92.8982	59.4138	74.0755	56.455	44.5604	44.4367	99.1008	76.1564	84.0253
Aco012835	17.644	8.01389	9.63015	-1.61626	0.600665	0.000107373	green	50.2187	67.0415	33.1584	43.2002	90.546	26.1226	66.7503	77.2092	7.17352	101.157	58.9194	8.80262	44.5361	46.3423	1.31616	16.4426	24.6703	5.60701	12.5743	7.05459	1.30052	2.25811	41.7159	52.8372	15.2446	9.52599	55.6313	80.4558	30.5284	54.0496	4.36593	1.58775	1.27533	3.5797	7.28991	3.71399
Aco005064	8.04505	1.42673	6.61832	-5.19158	0.442807	0.00684094	green	27.6947	33.3852	22.2059	22.0655	21.383	21.5545	11.3322	17.9782	5.58542	14.0336	19.4303	4.26277	10.4753	27.3235	6.16633	11.5775	26.7966	8.83701	12.1501	17.3626	14.8195	7.86477	11.008	36.3739	8.98781	15.7388	12.5394	17.6772	13.8592	29.2339	24.0071	24.8482	28.4951	22.0176	31.9883	27.4773
Aco021964	38.0908	12.7685	25.3224	-12.5539	0.687681	3.59049e-06	green	26.414	24.4069	38.0956	24.3676	27.6512	38.8723	16.4499	20.9692	15.5091	20.4926	22.1993	21.0029	26.6285	38.28	15.3234	15.0396	34.7771	25.2083	13.7061	15.2637	24.0942	9.09235	9.69845	33.1947	25.185	27.2465	16.3415	7.33981	4.02221	16.8738	7.28461	2.29756	3.0821	8.3127	12.463	15.9131
Aco009636	29.8337	14.8933	14.9403	-0.0469645	0.665093	9.64228e-06	green	251.983	166.359	97.0592	233.105	178.231	95.8884	135.308	158.08	73.368	296.772	55.3761	30.5917	124.925	55.229	38.0996	42.327	31.194	23.9995	38.9563	112.25	14.9019	25.252	85.9952	203.371	112.708	43.7643	126.306	229.13	81.4639	79.827	10.7017	5.7556	4.32048	25.6409	44.6987	25.3821
Aco015597	7.09072	2.54482	4.5459	-2.00108	0.475476	0.00338166	green	315.278	415.009	128.599	250.512	316.701	73.7018	48.528	183.488	28.4204	76.9834	232.471	24.982	138.839	229.006	37.3901	30.3879	278.696	56.6876	440.762	475.273	124.478	75.8368	95.1605	205.977	19.9592	77.6133	133.739	48.0811	10.1366	7.05765	155.417	58.8174	65.0876	337.623	218.826	187.21
Aco027894	102.165	40.9059	61.2586	-20.3526	0.803067	3.77973e-09	green	166.398	155.823	107.912	135.457	143.495	103.043	0.785394	22.6348	8.21109	12.4132	55.9961	13.7032	1.16481	46.7268	12.1164	0.484659	44.855	10.5793	0.825126	3.80749	10.027	0.856966	0.415958	135.34	6.00049	163.174	2.62442	1.55649	0.918698	0.94803	9.00079	5.20932	5.6099	11.1994	8.6453	16.4253
Aco003225	147.633	79.1454	68.4877	10.6577	0.895983	1.55512e-13	green	130.389	177.087	123.789	180.822	148.135	123.222	44.8102	75.3899	24.7019	163.721	123.294	47.931	74.0093	130.963	30.4331	18.613	75.6942	26.7012	15.4238	29.2596	44.6669	6.18246	6.64532	157.419	60.2595	82.9124	10.8126	75.3463	39.555	91.265	18.334	3.82145	5.09967	23.47	30.3973	35.7186
Aco011911	81.0565	19.8537	61.2028	-41.3492	0.733536	3.59316e-07	green	278.166	301.299	216.414	312.376	258.773	223.928	128.743	178.168	115.008	219.622	215.833	294.31	169.948	221.763	188.932	71.7908	180.415	143.224	81.2682	142.912	155.856	85.0868	75.0546	167.344	134.307	203.729	94.1691	97.2225	50.7283	111.067	126.772	36.9832	44.5975	152.494	114.311	150.068
Aco004140	10.747	4.66291	6.08411	-1.42119	0.660719	1.15639e-05	green	0.418822	1.07221	1.13532	0.348699	0.387287	0.454997	0.663513	0.739157	0	0.671263	0.671186	0.163281	0	0.338789	0.209062	0.349118	0.324487	0	0	0.290815	0.176885	0.241416	0.130029	0.890684	0.051952	0.481243	0.406536	0	0	0	0.266569	0.266467	0.394675	0.31514	0.116112	0.109956
Aco007459	8.6108	5.73195	2.87885	2.8531	0.557105	0.000416757	green	35.2117	35.7143	29.1625	19.2069	25.419	26.6971	17.9556	26.0194	18.8844	28.5596	22.7861	27.7671	25.0367	27.8142	23.3301	21.7501	22.8618	37.6586	29.2155	27.6299	39.6917	30.5262	25.1597	48.3913	16.1602	55.265	20.0186	16.0523	13.6172	16.9365	12.0983	14.0935	20.7242	30.8878	25.3106	24.4839
Aco017825	11.6051	5.18305	6.42208	-1.23902	0.612938	7.06543e-05	green	141.389	146.648	110.771	111.43	137.613	107.561	98.8506	124.342	84.4288	93.6576	87.6542	78.1167	94.0189	104.582	66.591	97.8858	115.224	52.2335	81.959	83.6445	56.2368	103.669	88.3337	153.287	104.968	96.9235	104.004	107.197	96.0929	86.6404	101.183	73.9559	73.516	150.202	128.183	130.924
Aco010700	10.3327	2.03151	8.30115	-6.26964	0.51186	0.00141764	green	24.1711	22.8131	24.7082	22.8933	22.923	26.5536	23.2107	25.514	21.6887	23.3464	17.6297	26.0022	22.1538	19.8338	20.858	15.9518	18.3927	17.4309	20.6036	14.1198	17.7342	20.5029	23.187	23.7883	18.4397	18.1469	22.8657	16.5712	14.3343	19.1598	14.7144	12.4254	14.4689	19.4018	21.6838	21.9824
Aco006204	8.05155	0.680863	7.37068	-6.68982	0.433796	0.00821255	green	11.0786	15.8924	16.3243	9.51347	14.5187	18.0627	13.3522	16.4319	11.6018	17.4169	16.0026	10.4512	14.5283	15.0109	9.3426	10.8774	14.6611	10.0774	12.5069	12.3438	6.78114	14.5946	12.9341	16.1483	14.7358	13.0006	16.1366	12.0815	8.80411	8.89404	13.8124	11.7845	13.8182	6.56698	8.65386	4.9926
Aco012817	7.23215	3.37487	3.85728	-0.482408	0.597419	0.000119602	green	33.2317	47.2433	38.3765	26.8082	41.2401	33.6873	27.0797	27.2636	15.8823	31.4519	33.8266	22.3303	31.2431	35.6164	17.0381	33.3159	26.9741	23.1652	35.0848	21.5196	18.6084	31.7882	29.6867	30.6157	20.1431	31.8778	30.3317	41.5537	23.2876	30.5838	34.3312	13.8891	18.0108	22.1935	23.5261	20.2829
Aco011054	4.32328	0.396181	3.9271	-3.53092	0.245382	0.149163	green	36.9648	53.2727	39.3271	62.0314	61.9427	68.1049	33.7202	38.0135	19.5932	75.402	97.2211	39.8132	83.0779	76.4292	46.1539	47.015	93.7432	76.3406	24.631	36.8682	42.5488	16.354	10.4327	41.0383	70.883	34.7797	8.11261	43.287	48.885	95.4374	55.4565	42.3379	46.3165	43.9728	40.8926	46.1715
Aco022295	33.6445	15.7887	17.8558	-2.06713	0.732874	3.7266e-07	green	22.0984	17.3709	16.5926	17.8557	14.7137	16.1651	2.89496	14.33	12.7837	6.46142	6.3764	5.00614	7.72748	12.5222	5.99469	7.01329	15.3309	10.6132	4.38385	8.92219	18.8162	4.30231	8.52862	26.2903	4.53922	12.9476	4.53093	4.14634	1.84054	2.31068	3.65139	3.48423	3.11882	9.12865	7.60421	7.31342
Aco008405	22.8495	21.5904	1.25911	20.3313	0.71102	1.17515e-06	green	15.1317	19.3674	9.03181	10.5424	11.9453	6.92578	10.0208	24.0403	7.73362	47.3493	36.391	9.82093	21.019	47.8851	7.95132	6.21184	22.2033	11.3048	8.871	18.4597	7.64406	9.63707	13.5743	81.596	8.54994	36.2071	12.3438	12.8619	9.39202	8.0134	3.10674	3.18523	2.76354	11.8408	11.1454	8.05664
Aco003138	68.0797	13.5528	54.5269	-40.9741	0.640581	2.57438e-05	green	393.445	630.7	697.573	518.578	689.316	811.889	74.5309	422.087	158.269	264.196	860.291	536.478	130.831	757.108	405.546	46.402	928.999	383.138	14.8086	98.5269	266.07	9.94703	11.874	823.628	517.295	818.497	13.9642	141.208	54.8516	437.352	61.8926	24.8096	31.5203	171.136	229.539	535.874
Aco014052	77.2411	4.10437	73.1368	-69.0324	0.60067	0.000107355	green	211.806	210.987	254.047	190.247	205.268	250.099	174.77	229.41	224.476	175.747	195.167	186.945	180.719	223.547	192.715	207.191	255.704	176.983	180.531	150.523	189.62	128.349	172.429	231.65	170.758	209.402	145.243	177.919	108.209	136.627	32.4142	35.1634	36.8946	97.7461	170.975	124.119
Aco008334	14.3787	7.16224	7.2165	-0.0542653	0.355576	0.0333149	green	0.790746	3.65531	1.19933	3.73185	4.03693	0.663736	4.76211	0.503508	0	6.79566	7.71811	1.10148	6.05439	3.20357	1.00487	4.77296	3.44057	1.79143	4.32428	1.34219	6.14873	0	1.36016	40.9307	11.1719	6.041	3.56364	5.86234	3.93563	2.96354	0.666345	1.15525	0.316221	23.4444	18.8156	15.0782
Aco021176	12.502	6.08168	6.42033	-0.338651	0.5978	0.000118104	green	87.8883	89.6027	38.9596	46.0904	113.563	34.4082	40.5308	142.049	32.5835	77.257	169.776	36.21	58.7434	159.65	36.2603	47.928	124.496	57.8659	20.3565	99.5458	74.1217	10.0944	25.1467	142.086	58.4503	175.768	23.0027	105.626	56.0412	46.426	20.1237	25.5025	25.9787	81.6224	80.1878	83.3463
Aco004669	98.7276	43.3871	55.3405	-11.9534	0.844743	9.34034e-11	green	277.335	306.413	193.683	207.747	267.148	167.927	125.57	207.27	125.621	161.533	200.662	102.932	125.69	229.3	107.675	96.709	208.212	117.193	110.663	168.453	134.058	142.047	112.967	213.621	156.275	190.063	102.393	98.2904	129.552	165.231	85.0354	66.7093	78.956	118.622	121.009	105.456
Aco005552	44.2604	18.2583	26.0021	-7.74374	0.752771	1.18457e-07	green	3.77046	3.97134	3.70123	2.39296	1.1161	0.791333	1.20562	1.03869	0.270106	0.878841	0.989678	0.152979	1.1848	2.57866	0.854468	0.858136	2.50999	0.763696	0.122113	0.195002	0.270379	0.19391	0.761835	1.75868	0.112944	1.61417	0.577503	0.330647	0	0.048769	0.093929	0.08229	0.191948	0.438456	0.319626	0.745827
Aco009867	37.2701	23.0343	14.2357	8.79859	0.732086	3.89164e-07	green	18.0033	29.1134	14.1624	20.2725	26.8444	13.8248	21.718	19.0729	4.20449	67.2064	28.995	4.25674	38.8871	30.2576	3.28774	15.357	17.6184	3.62387	25.9293	9.63746	3.41275	14.9663	10.9311	35.1557	3.09444	8.20909	12.3581	9.09105	4.54855	4.21361	1.47338	0.709791	0.564824	4.20916	6.28417	5.39316
Aco016634	78.597	36.6024	41.9946	-5.39222	0.806166	2.96137e-09	green	49.0438	43.3654	49.6607	26.3688	23.0138	35.7606	17.0064	27.4604	21.0749	26.3026	21.2167	18.5866	19.2276	31.9025	14.3219	13.4393	19.6002	22.5674	15.0148	15.1945	16.8579	17.3672	18.6023	39.4525	12.9027	40.6891	15.9514	17.4751	7.83648	10.6059	8.60729	7.21426	11.8648	16.9743	14.7977	24.504
Aco017382	10.098	1.22096	8.877	-7.65605	0.36718	0.0276003	green	6.7313	8.66157	12.7364	7.72638	8.71503	12.9848	4.97631	14.3706	9.79335	18.9257	21.3013	18.4235	15.1376	20.4899	12.9161	10.4592	17.4475	11.2897	7.76388	6.53958	9.72898	8.02998	5.50665	17.3798	19.3068	17.3976	4.15707	15.8648	11.5836	16.6654	2.58913	3.91505	2.77847	7.62195	9.69776	10.1432
Aco011301	9.49622	3.71319	5.78303	-2.06984	0.574034	0.000251638	green	5.29074	7.65961	6.22427	5.37768	5.69441	5.89374	7.22795	3.11364	1.82061	9.28516	3.22959	2.59614	7.43462	3.96711	1.97587	4.57517	1.95006	2.29206	0.706782	0.307897	0.10272	7.31535	1.6291	9.01838	3.38823	3.28213	0.789503	8.18439	7.47972	6.71787	0.441918	0.439321	0.319823	2.03706	1.94435	2.04565
Aco025504	2.34593	1.03222	1.31371	-0.281486	0.449159	0.00599649	green	6.11454	6.5315	6.40697	6.64004	6.69008	5.62019	6.83897	5.72773	3.45335	8.52016	5.50988	4.80501	7.05221	6.74063	4.38546	2.74498	5.21573	4.12048	4.70765	5.8789	6.24922	2.81738	5.12388	2.88422	4.39266	5.24327	7.39841	5.00512	3.32605	3.06421	5.74494	2.01312	2.44091	6.7769	6.52662	7.48754
Aco003040	42.8623	26.6414	16.221	10.4204	0.811989	1.85008e-09	green	62.9549	85.8366	46.0949	63.2397	56.0682	28.9594	48.8804	48.5239	39.0969	94.6417	72.644	29.5737	56.9817	54.8609	33.2642	29.8419	39.7528	55.1449	34.6017	22.5229	18.8516	46.4744	45.2185	87.8804	35.0728	56.3144	57.3741	51.9628	30.4093	25.8584	11.2564	11.4907	11.6885	63.0108	47.5101	30.142
Aco001649	141.466	99.1053	42.3602	56.7451	0.937516	3.72098e-17	green	1277.48	1448.08	971.082	1406.57	1303.17	932.141	542.633	746.539	280.643	1554.7	1535.75	428.454	814.415	1490.59	314.868	270.954	896.462	374.526	209.218	472.976	426.246	147.339	189.167	2030.97	594.64	848.611	241.932	436.055	281.325	566.536	329.406	176.831	174.651	294.597	369.377	482.934
Aco007248	131.069	90.0055	41.0639	48.9416	0.923298	1.08676e-15	green	182.161	196.726	67.8506	185.811	161.216	55.6697	49.8846	85.1537	31.8927	106.186	143.455	30.2983	78.0578	148.374	21.1608	32.0349	107.637	27.827	24.5752	39.6581	42.5243	58.0167	29.635	175.475	28.3636	92.6752	29.9782	45.0397	25.0434	25.1069	25.5008	16.8256	15.6215	63.5938	48.6241	48.7838
Aco014751	101.063	53.8445	47.219	6.62555	0.827631	4.80494e-10	green	130.142	138.379	87.0475	124.744	125.199	79.5643	48.6317	59.9134	17.9635	105.925	130.31	39.7072	67.9892	92.6691	25.0555	30.4835	48.9383	25.4319	9.72987	11.093	21.3414	29.4091	22.1853	86.1254	22.2204	59.5047	28.852	63.1268	18.5596	15.6596	48.5618	50.3669	44.0085	48.923	34.6032	50.0012
Aco023326	48.2936	28.532	19.7616	8.77045	0.822594	7.52344e-10	green	57.2172	91.2428	63.1653	40.2992	78.1994	53.4132	37.6517	70.3679	37.6531	58.6348	90.6446	38.2945	57.3142	89.2785	37.4193	38.0371	64.6644	42.3838	44.8644	62.582	42.7196	46.9994	36.1578	85.8856	44.2136	70.0946	36.0275	34.2342	38.1265	42.0012	25.7861	19.7492	19.4979	53.5489	48.0913	49.0514
Aco021993	91.9115	69.6087	22.3028	47.3059	0.932285	1.40109e-16	green	204.316	185.267	156.605	179.186	165.284	142.093	149.607	130.154	96.2115	226.534	153.202	97.141	174.82	171.149	86.3151	111.45	155.537	105.387	117.798	131.371	126.989	79.6271	98.6889	206.214	87.5507	176.508	122.851	103.814	88.4961	84.9185	77.9733	65.6095	67.465	136.736	123.732	136.539
Aco014573	109.341	77.4555	31.8851	45.5704	0.928499	3.43053e-16	green	111.234	88.921	56.185	99.9451	90.1415	52.2248	61.1396	70.7884	27.3188	108.597	83.0374	36.9071	72.5571	92.1312	30.7733	36.4699	85.0855	31.0246	47.2306	61.5965	37.5352	41.6778	32.3855	116.355	33.7124	65.938	41.1878	32.6825	14.5168	24.7232	18.6206	6.22654	7.07475	25.7346	25.7737	19.3156
Aco031333	10.161	3.48187	6.67911	-3.19724	0.453459	0.00547719	green	451.852	630.156	408.507	551.434	733.338	552.813	462.261	511.406	211.085	778.377	900.112	215.777	294.623	517.868	182.564	239.17	260.724	153.313	162.882	67.2093	35.1896	77.27	391.405	425.786	260.145	132.304	456.663	1221.9	753.402	462.855	49.2686	50.1339	54.8949	34.2029	73.2499	50.387
Aco001052	7.95107	5.55432	2.39675	3.15758	0.6455	2.12858e-05	green	19.6686	27.8251	7.08718	17.4237	16.0208	3.78247	9.62706	12.1361	5.75331	25.0822	34.2454	2.80954	13.6215	31.0761	2.33073	8.65596	34.0567	5.39326	10.2158	11.0146	6.2242	38.4276	14.9684	29.1405	5.86282	39.6679	5.10315	0.987369	1.93581	3.087	2.98529	2.44485	2.6448	23.6468	13.0093	13.2609
Aco012533	71.4934	18.6559	52.8375	-34.1816	0.677152	5.75092e-06	green	1301.36	1264.36	1039.5	1406.88	1461.77	1144.84	467.21	709.567	284.2	985.478	1249.45	425.71	605.685	1215.78	310.552	269.005	800.425	350.319	166.672	323.525	527.357	378.185	167.174	1093.79	710.187	706.865	221.452	340.105	466.534	634.882	1337.77	591.981	861.562	457.701	566.132	464.876
Aco021886	3.68402	1.04419	2.63983	-1.59563	0.198366	0.246146	green	35.5441	37.4415	25.0264	40.4421	38.8496	18.4712	31.294	37.9289	26.2056	62.7408	43.6357	21.0724	38.8775	35.6255	18.3623	30.9161	20.117	12.6659	20.0842	5.04605	7.45066	15.0047	24.1671	51.0133	30.3494	18.3774	22.7071	122.977	33.4814	51.6596	62.0854	26.5395	33.716	14.0243	8.35558	11.7101
Aco013599	2.51429	1.8096	0.704689	1.10491	0.304485	0.0709843	green	2.50804	1.61027	1.65292	0.402717	0.324566	0.954253	0.101623	0.300345	0.708433	0	0.42303	0.301069	0	0	1.08898	0	0.109637	0.119718	0.663387	2.46414	2.03489	0	0.260698	8.74474	2.85098	0	0.791303	0.518338	0.418227	3.51021	0	0.363958	0.674136	2.14311	2.3553	4.40597
Aco003002	31.7835	13.6378	18.1457	-4.50797	0.670235	7.75741e-06	green	687.789	559.286	595.286	575.061	442.175	506.653	562.992	268.068	276.188	519.512	287.737	289.563	423.761	297.122	302.415	336.256	267.576	308.315	324.471	223.486	292.921	391.118	407.917	560.174	303.967	503.448	441.32	297.32	321.947	345.332	328.515	245.395	364.054	425.949	363.553	371.677
Aco003618	35.085	20.2778	14.8072	5.47059	0.753421	1.13896e-07	green	51.5822	50.2242	47.4121	41.533	45.6187	32.9563	25.7093	27.4659	18.7207	37.6956	31.4128	25.9127	28.9814	34.407	21.9416	24.2228	39.0184	32.1809	32.1706	48.1905	35.5414	46.3606	27.2008	54.919	20.3385	34.9374	24.4265	23.2063	19.5593	19.1008	27.3468	19.0796	23.8849	44.3536	32.5712	35.716
Aco009966	16.6899	11.3502	5.33964	6.01059	0.68331	4.37608e-06	green	70.2953	59.3728	33.8398	71.4626	77.5866	37.9018	44.2462	76.8408	39.2408	93.8367	87.6599	43.1711	56.5884	70.4922	41.5992	37.366	60.4923	53.7987	35.4384	25.2598	22.7157	30.5463	42.7349	83.2293	66.7671	53.4607	48.4367	42.6825	34.6518	39.3525	38.708	30.9791	57.0546	38.874	52.0419	38.9383
Aco024875	16.835	5.71858	11.1164	-5.39782	0.639309	2.70265e-05	green	0.88261	1.80382	0.64693	0.677622	1.11547	1.12189	0.489088	1.7054	0.769599	1.63583	1.09806	0.644394	0.889034	0.959908	0.618428	0	0.66905	0.385428	0	0.532477	0	0.372415	0	0.616689	0.710132	0.253174	0.277244	0	0.300368	0.323825	0	0	0.251561	0.05894	0.492534	0
Aco029563	79.0974	31.3577	47.7397	-16.3819	0.743306	2.06993e-07	green	195.472	262.208	203.162	281.934	275.203	205.203	109.087	119.616	48.855	195.915	240.335	105.727	150.015	196.893	65.8191	55.1632	130.299	54.3295	39.2329	71.5544	75.6288	57.356	38.4768	130.502	123.9	115.547	50.639	138.273	68.814	158.657	160.538	32.8869	56.4682	100.667	104.413	108.839
Aco013319	128.552	98.2333	30.3185	67.9148	0.946136	3.18915e-18	green	630.44	912.778	340.796	684.44	859.529	305.13	243.394	313.451	56.6995	751.553	708.017	82.4953	358.362	543.862	40.5264	116.59	230.96	37.2445	16.4169	22.3303	15.9304	5.57204	36.3336	1142.48	123.103	495.808	131.737	330.66	28.3203	55.4617	5.03316	6.97602	15.0953	199.938	208.823	191.962
Aco003236	71.0648	41.4386	29.6262	11.8124	0.823176	7.14859e-10	green	23.4023	19.7259	17.9633	17.0155	13.3897	15.2645	14.0858	13.2069	11.8009	18.8795	10.6714	13.5695	16.6513	12.3815	8.9445	8.37093	10.0333	8.61937	11.0049	10.964	9.59257	14.3308	13.1103	21.9233	8.8456	12.2994	13.9351	10.0691	9.61308	9.852	5.47949	4.67402	5.99755	12.3209	11.3051	13.2702
Aco007005	1.27836	0.656688	0.621669	0.0350186	0.369971	0.0263541	green	7.99416	8.36588	8.28075	8.1934	8.25629	7.42185	9.46429	6.57591	3.85654	11.4256	5.93437	5.37796	8.06827	8.04459	4.92917	3.78492	5.60651	5.66794	5.65819	6.67057	7.43747	4.39603	6.79057	4.48991	5.23404	6.26925	9.44904	5.48922	4.02932	3.94378	9.82794	4.04801	4.75294	8.22962	8.20449	11.1091
Aco013197	37.1129	18.3941	18.7188	-0.324684	0.749271	1.46027e-07	green	144.92	109.951	124.593	127.148	92.1224	104.217	88.3831	72.9903	71.7031	119.038	75.5496	87.8584	86.8883	82.678	88.0935	83.0786	85.7779	96.9041	71.0561	64.8523	91.9858	48.9268	68.5398	113.412	46.9825	136.326	74.797	101.927	39.8759	48.2352	51.1111	39.5273	48.8806	68.869	58.5677	66.9012
Aco017027	71.4201	34.311	37.1091	-2.79805	0.785041	1.442e-08	green	61.4125	59.1815	29.1331	47.189	34.8886	23.3487	38.3538	32.1526	13.4629	52.9888	31.0484	13.3843	33.4449	33.1093	13.7781	31.3149	26.1369	13.295	30.2298	29.142	13.3296	36.0253	38.5441	55.2004	27.3152	31.9572	43.6802	27.5332	16.6486	13.8075	26.1485	12.9885	16.1765	27.4018	21.7001	19.1489
Aco012477	81.4349	29.2571	52.1778	-22.9208	0.84198	1.2326e-10	green	190.772	202.45	180.605	173.942	179.988	178.431	130.042	157.137	97.0204	210.09	173.098	106.433	134.712	145.24	56.6711	98.2639	151.717	63.3387	70.7831	91.4296	105.37	34.7581	119.835	169.14	118.099	147.962	98.4724	142.411	70.0554	94.9488	14.6739	11.3333	10.7022	161.189	109.237	130.22
Aco011994	6.91944	4.85135	2.06809	2.78326	0.28722	0.0894138	green	8.76083	10.7543	8.74203	14.0413	13.0017	9.1646	11.7822	12.7751	7.99479	22.6751	53.9384	17.3076	29.0852	35.4774	19.2531	13.0818	42.5997	29.6926	6.97019	7.84639	21.658	22.0727	7.4309	104.712	66.0542	30.717	4.15936	38.8064	46.9817	47.4779	11.5989	7.1867	6.30101	21.7232	34.5604	17.8931
Aco001436	8.14127	1.18467	6.9566	-5.77193	0.431699	0.00856365	green	45.1312	59.0312	32.5882	48.1809	70.1488	34.8476	43.8921	57.5966	25.2011	46.2205	42.4832	22.477	43.0078	47.0566	22.8895	36.7811	55.8417	25.6984	40.8472	56.9483	34.2849	37.5155	36.0684	32.8737	60.5807	24.6226	41.0902	49.6458	44.5917	47.5687	18.8193	20.0711	23.1253	36.8005	35.5565	35.9768
Aco014461	7.22648	5.23432	1.99216	3.24215	0.437942	0.00755484	green	2.7118	2.97948	3.9354	1.40462	2.88597	3.42764	0	4.83684	0.459267	2.65396	1.51675	3.3768	1.58048	6.2503	2.69507	0.367572	3.0997	6.35768	0	1.48814	2.37586	0	0	16.9689	10.5012	7.53802	0.434498	2.02233	1.17181	3.53171	2.87111	1.09915	2.30938	0.991416	0.743366	1.8285
Aco005353	3.50794	1.89071	1.61723	0.273474	0.499366	0.00193146	green	60.8996	54.4817	35.3132	69.6892	60.2834	20.319	47.186	22.1329	9.52004	70.6235	45.2523	22.1928	81.09	44.0369	13.8165	47.9409	37.7996	19.5357	22.7024	32.2496	33.0089	17.2011	24.663	32.2884	17.8791	42.4203	23.7398	95.4106	41.9102	28.2164	33.5664	26.9831	16.6167	47.7674	34.2903	32.1949
Aco014183	81.8646	47.2625	34.6021	12.6604	0.844977	9.12058e-11	green	365.447	329.387	319.169	335.803	270.228	291.146	217.743	159.949	130.86	297.465	231.231	177.486	258.312	256.576	150.042	168.94	192.618	196.259	222.645	121.828	243.298	58.3084	114.432	326.477	110.512	281.811	115.157	118.727	105.062	182.569	102.789	55.445	53.5383	72.3302	91.6268	102.038
Aco002804	19.6432	17.6009	2.04222	15.5587	0.686258	3.83072e-06	green	52.6417	54.4539	44.8385	39.1023	47.2431	42.4475	22.6528	37.3287	20.5568	66.4974	65.3612	31.1409	41.1025	80.5357	24.1045	18.4555	43.8131	48.8884	18.7833	30.9204	37.0063	18.9869	23.8462	153.73	17.8295	181.472	18.7249	23.4014	16.0573	18.9477	16.8068	14.6271	14.6466	30.7386	27.6402	28.2303
Aco005661	9.25599	4.41943	4.83656	-0.41713	0.532436	0.000829765	green	15.355	19.0988	2.55446	17.9224	11.0722	0.754006	13.9091	4.45075	1.37043	16.838	7.22523	0.228723	7.24224	3.78899	1.47291	7.72832	2.05302	7.90546	7.60439	1.10549	2.5816	9.9123	6.32849	17.2803	2.17891	2.40505	7.1335	5.81711	2.64148	0.146032	3.99382	3.00295	4.39796	24.6589	13.0839	9.96834
Aco017108	2.17277	1.07167	1.1011	-0.0294362	0.556975	0.000418327	green	2.86043	5.01489	6.18945	2.65583	8.10623	3.98437	1.83361	5.48509	0.479946	2.92899	3.43729	1.24229	7.12879	5.97462	2.94782	2.98506	3.78095	2.54634	3.0948	5.1279	2.75666	2.4053	5.89243	4.51026	2.96808	3.37075	2.46855	3.80155	1.35217	1.35164	0.178424	1.02216	2.14847	2.06556	1.75303	1.89952
Aco006143	10.4676	9.9667	0.500899	9.4658	0.619067	5.69503e-05	green	2.12884	3.10588	1.30215	2.35602	2.19027	0.70004	0.6724	2.54685	0.258686	1.85947	2.95109	0.250311	3.45907	6.52998	0.122272	0.872478	10.4061	0.199703	1.84917	1.5869	0.305731	0	1.16045	14.938	0.041387	0.949082	1.35195	1.9014	0.085324	0	0.021108	0	0.121197	2.78924	1.42595	1.66661
Aco014105	8.58322	3.61143	4.97178	-1.36035	0.482252	0.0028966	green	187.439	283.674	167.457	262.418	417.821	227.311	168.917	240.851	78.3183	592.777	602.384	192.03	367.534	451.961	107.231	104.888	224.99	69.8271	75.5218	61.986	77.3921	11.7826	16.8118	438.805	201.262	163.782	46.2756	488.484	443.023	484.901	194.527	165.956	154.248	23.3943	33.9194	40.1023
Aco015495	5.44882	1.92626	3.52256	-1.5963	0.397457	0.0163771	green	7.18862	5.22853	2.205	9.11171	8.04467	4.55484	5.99337	5.98677	3.23746	9.46371	7.64828	2.84736	8.3123	4.91657	2.53186	5.31276	2.3803	0.393248	4.1494	0.687762	0.385632	5.73911	2.26715	2.08702	3.56741	0.928113	2.07764	9.29763	6.01998	2.01868	4.53426	1.47012	2.09917	2.52771	3.07707	1.84881
Aco002236	7.44876	1.35119	6.09758	-4.74639	0.490853	0.00236897	green	49.4744	52.8248	51.6683	40.3893	50.2364	46.125	36.695	39.6572	43.6604	48.3397	63.2	57.6318	47.4543	50.5265	49.7452	44.0291	46.9551	46.3277	49.1111	65.7783	70.7457	50.2229	45.0907	60.2315	36.4097	63.1228	33.442	51.3108	36.4928	33.8163	27.6421	22.4067	27.5065	34.7448	33.5462	35.2609
Aco024505	11.9879	10.4986	1.48929	9.00933	0.731071	4.11414e-07	green	3.19363	11.0803	4.41448	0	0	1.8014	2.1233	3.42093	1.97738	8.84648	5.06676	1.60098	0.636718	5.08482	0	2.15897	0	2.85582	3.75909	0	0	0	0	9.84397	0	6.4345	0	0	0.388571	0	0	0	0	0	0	0
Aco002224	14.3865	2.77966	11.6069	-8.8272	0.527334	0.000950632	green	12.8305	17.8838	12.5917	13.2244	19.0307	10.735	15.7694	20.6373	10.5034	17.2515	16.9626	11.345	19.4424	18.0819	9.5788	14.7038	15.6789	7.18029	15.7916	20.8762	7.9857	8.69261	15.9678	18.2279	21.2248	8.01985	13.0217	9.35536	9.68912	10.5779	6.00263	3.98333	4.51729	6.25943	6.89405	4.33581
Aco018955	57.8203	38.5203	19.3	19.2203	0.81909	1.01935e-09	green	14.3463	8.63626	5.46779	14.593	4.67302	2.24558	0	0	0	4.20868	5.2412	0.285289	1.30542	12.252	0	0	3.74026	0	0	0	0.514848	0	0	14.7536	0	1.35567	0	0	0	0.505037	0.74704	0	0.461485	0	0	0
Aco005755	41.2907	12.6193	28.6714	-16.0521	0.72856	4.71549e-07	green	219.969	301.106	162.526	252.565	293.568	176.712	84.5313	158.593	57.2558	193.424	278.356	133.46	101.681	233.519	95.7268	21.4459	165.066	119.837	11.3745	25.415	59.4849	30.4601	29.1493	295.168	115.531	324.872	53.2613	329.709	119.65	204.58	14.8928	8.0433	9.36566	153.998	215.944	207.812
Aco001814	89.8041	61.9314	27.8727	34.0587	0.851797	4.48631e-11	green	101.222	104.588	61.551	105.89	114.23	51.5784	58.0303	48.7213	29.8847	109.426	81.5441	35.6636	65.1119	80.3653	30.6024	39.7311	55.3202	32.845	44.1546	33.2565	30.2352	33.8076	38.927	91.3316	40.9996	64.5245	36.2586	39.5008	30.6808	40.1665	51.3304	56.3357	51.9616	39.7369	45.8915	43.7171
Aco006031	96.4555	21.1426	75.3129	-54.1703	0.722356	6.56426e-07	green	57.3134	65.3985	57.3708	62.3532	61.5572	55.0204	29.9425	37.6875	27.3051	44.1748	49.6881	50.123	41.3601	62.0801	40.6169	20.8161	52.977	42.739	21.5376	39.449	54.1396	15.1658	15.2621	45.647	36.5015	49.7861	14.7112	25.0504	22.9634	49.0881	19.3987	8.38358	10.201	29.3094	31.8035	39.3896
Aco018249	0.356744	0.13195	0.224794	-0.0928434	0.397708	0.0163031	green	2.70424	1.31426	2.21748	2.13806	1.55089	1.51365	1.91391	0	0	2.1585	2.06714	1.28838	3.82196	2.19119	1.86161	0	0	0.29862	1.24368	0	0	0	3.19198	2.18855	2.10732	2.86258	0.874034	0	1.58585	3.11548	0.450537	0.738022	0.761103	1.05957	2.37153	0
Aco009168	42.1549	22.8236	19.3313	3.49234	0.76615	5.15191e-08	green	16.3053	14.8474	9.26607	15.5893	12.3926	7.23941	5.98457	8.43278	4.34593	10.9173	11.4232	5.36171	7.67668	10.8625	5.79587	6.5813	11.7408	6.18846	10.4396	11.7895	11.3419	5.78921	5.46253	10.3252	5.20545	10.7145	5.71543	6.79624	3.75219	5.6967	3.84362	4.57248	4.51042	11.5961	9.92423	11.4034
Aco006786	19.1024	5.70297	13.3994	-7.69644	0.61261	7.14641e-05	green	165.095	229.251	114.086	146.302	218.856	121.668	45.2094	88.8777	51.8823	96.7672	230.591	166.473	79.5308	147.442	68.2912	32.2823	84.0266	58.1937	38.118	104.694	256.676	38.0514	19.0934	97.7245	35.1827	81.7961	19.4234	43.8871	9.13373	24.1144	72.8812	14.0635	16.0921	62.9004	47.1994	55.466
Aco023861	99.4828	46.3425	53.1403	-6.79777	0.797396	5.84266e-09	green	40.7796	29.644	15.3653	41.3208	35.432	4.13799	1.43182	6.85892	0.514877	11.4964	23.3557	3.00618	5.87884	13.8678	0.60006	1.31656	9.7359	0.340515	0.123194	0.507355	0.188442	0	0.241981	21.5326	1.65679	1.39605	0.399637	1.12737	0	0	2.08045	0.059854	0	1.59942	3.20878	5.62767
Aco007869	26.0225	12.5935	13.429	-0.835486	0.654309	1.50145e-05	green	49.5202	84.3505	51.6015	80.8866	98.7145	62.7794	28.9559	34.8847	2.872	50.4366	84.1563	15.4959	47.5179	102.564	6.53421	26.4127	66.1947	11.2544	9.62879	18.4011	5.70093	10.7417	2.09181	48.2161	27.6438	45.8714	2.54373	54.2984	9.95451	50.8323	75.1158	23.2081	20.5098	24.5386	38.9892	39.2565
Aco016177	41.0403	29.1825	11.8578	17.3247	0.765986	5.20643e-08	green	27.4691	42.7423	4.80082	41.1489	54.5343	2.49427	10.3908	15.1592	0.954267	36.97	30.5575	0.567653	17.3644	19.5189	0	9.97937	32.4994	0.636985	0	3.69705	1.74459	0	0.232441	21.8432	0	10.3312	0.775903	5.4062	0.093768	0	6.509	2.56666	9.6253	16.4265	6.58578	8.75074
[truncated: 20,456 more rows]
